# Supplementary material for: Synthesis of 4-(trichloromethyl)pyrido[2′,1′:3,4]pyrazino[2,1-b]quinazolinones through a cyclized dearomatization and trichloromethylation cascade strategy
Source: Royal Society of Chemistry journal article supplement (doi:10.1039/d3ob02084c), 2024-01-01

Supporting Information

**Synthesis of 4-(trichloromethyl)pyrido[2',1':3,4]pyrazino  
[2,1-b]quinazolinones through a Cyclized Dearomatization  
and Trichlomethylation Cascade Strategy**

Xu Zhang, Meng-Yan Wei, Jun-Cheng Su,\* Cui Liang, Cheng-Xue Pan, Gui-Fa Su,\*  
and Dong-Liang Mo\*

*State Key Laboratory for Chemistry and Molecular Engineering of Medicinal  
Resources, Key Laboratory for Chemistry and Molecular Engineering of Medicinal  
Resources (Ministry of Education of China), Collaborative Innovation Center for  
Guangxi Ethnic Medicine, School of Chemistry and Pharmaceutical Sciences, Guangxi  
Normal University, 15 Yu Cai Road, Guilin, 541004, China. E-mail:  
su\_juncheng@163.com; gfysslgx@163.com; moeastlight@mailbox.gxnu.edu.cn*

**Contents**

|     |                                                                   |     |
|-----|-------------------------------------------------------------------|-----|
| 1.  | General experimental information                                  | S2  |
| 2.  | Synthesis of compounds <b>2</b>                                   | S2  |
| 3.  | Gram scalable preparation of <b>2a</b>                            | S15 |
| 4.  | Synthesis of compounds <b>3a-5a</b>                               | S15 |
| 5.  | Synthesis of compounds <b>6-7</b>                                 | S18 |
| 6.  | Mechanistic studies                                               | S21 |
| 7.  | Synthesis of compounds <b>1</b>                                   | S23 |
| 8.  | X-ray structures for compound <b>3a</b>                           | S35 |
| 9.  | References                                                        | S36 |
| 10. | NMR spectra for compounds <b>2, 3a, 4a, 5a, 6, 7</b> and <b>1</b> | S36 |

## 1. General experimental information

$^1\text{H}$  NMR,  $^{13}\text{C}$  NMR and  $^{19}\text{F}$  NMR spectra were recorded at ambient temperature using 400, 500 or 600 MHz spectrometers. The data are reported as follows: chemical shift in ppm from internal tetramethylsilane on the  $\delta$  scale, multiplicity (br = broad, s = singlet, d = doublet, t = triplet, q = quartet, m = multiplet), coupling constants (Hz), and integration. High resolution mass spectra were acquired on an LTQ FT spectrometer, and were obtained by peak matching. Melting points are reported uncorrected. Analytical thin layer chromatography was performed on 0.25 mm extra hard silica gel plates with UV254 fluorescent indicator. Chromatography was performed using with 300-400 mesh silica gel ( $\text{SiO}_2$ ). Unless otherwise noted, all reagents and solvents were obtained from commercial sources and, where appropriate, purified prior to use.

## 2. Synthesis of compounds 2

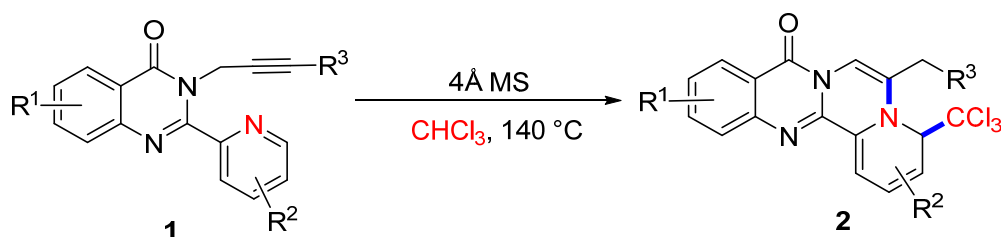

**General procedure A:** A 25 mL reaction flask was charged with compounds **1** (0.20 mmol) and 4Å MS (500 mg).  $\text{CHCl}_3$  (2 mL) was then added via syringe and the reaction vessel was sealed with a Teflon cap. The reaction mixture was stirred vigorously at 140 °C in an oil bath for 12-48 h until **1** was consumed completely (monitored by TLC). At this time, the solvent was removed under reduced pressure and the crude product was purified by flash column chromatography (1/10 to 1/6, ethyl acetate/petroleum ether) to afford compounds **2**.

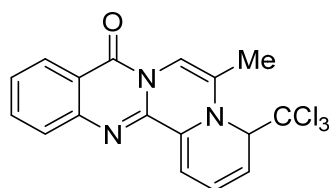

**2a**

**6-methyl-4-(trichloromethyl)pyrido[2',1':3,4]pyrazino[2,1-b]quinazolin-9(4H)-**

**one (2a).** **1a** (0.052 g, 0.20 mmol) ran for 16 h. Purification using medium pressure chromatography (eluent with a mixed ethyl acetate/petroleum ether = 1/6) afforded **2a**. A yellow solid, 0.048 g, 63% yield; Mp: 184–185 °C; <sup>1</sup>H NMR (400 MHz, CDCl<sub>3</sub>) δ 8.31 (d, *J* = 8.0 Hz, 1H), 7.75-7.69 (m, 2H), 7.47-7.43 (m, 1H), 7.13 (s, 1H), 6.90 (d, *J* = 6.4 Hz, 1H), 6.75 (dd, *J* = 9.2, 6.4 Hz, 1H), 5.94 (dd, *J* = 8.8, 6.4 Hz, 1H), 5.22 (d, *J* = 6.4 Hz, 1H), 2.26 (s, 3H); <sup>13</sup>C NMR (125 MHz, CDCl<sub>3</sub>) δ 157.5, 147.3, 144.2, 134.5, 132.5, 128.4, 128.3, 127.6, 127.0, 126.8, 119.9, 113.9, 106.1, 103.6, 102.5, 66.6, 16.7; HRMS (ESI) *m/z* calcd for C<sub>17</sub>H<sub>13</sub>Cl<sub>3</sub>N<sub>3</sub>O [M + H]<sup>+</sup>: 380.0119, found 380.0111.

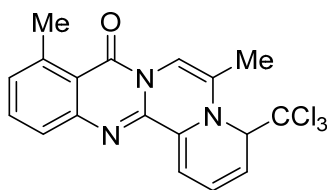

**2b**

**6,10-dimethyl-4-(trichloromethyl)pyrido[2',1':3,4]pyrazino[2,1-b]quinazolin-9(4H)-one (2b).** **1b** (0.055 g, 0.20 mmol) ran for 18 h. Purification using medium pressure chromatography (eluent with a mixed ethyl acetate/petroleum ether = 1/10) afforded **2b**. A yellow solid, 0.045 g, 57% yield; Mp: 188–189 °C; <sup>1</sup>H NMR (400 MHz, CDCl<sub>3</sub>) δ 7.61-7.55 (m, 2H), 7.22 (d, *J* = 6.4 Hz, 1H), 7.13 (s, 1H), 6.94 (d, *J* = 6.0 Hz, 1H), 6.76 (dd, *J* = 8.8, 6.4 Hz, 1H), 5.94 (dd, *J* = 8.4, 6.4 Hz, 1H), 5.22 (d, *J* = 6.4 Hz, 1H), 2.89 (s, 3H), 2.26 (s, 3H); <sup>13</sup>C NMR (150 MHz, CDCl<sub>3</sub>) δ 157.7, 148.5, 144.0, 141.5, 133.7, 132.3, 129.5, 128.4, 128.1, 125.6, 118.4, 113.9, 106.0, 103.7, 102.4, 66.6, 23.2, 16.8; HRMS (ESI) *m/z* calcd for C<sub>18</sub>H<sub>15</sub>Cl<sub>3</sub>N<sub>3</sub>O [M + H]<sup>+</sup>: 394.0275, found 394.0275.

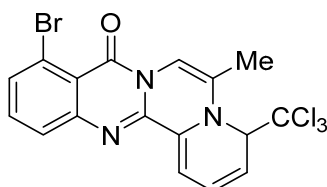

**2c**

**10-bromo-6-methyl-4-(trichloromethyl)pyrido[2',1':3,4]pyrazino[2,1-b]quinazolin-9(4H)-one (2c).** **1c** (0.068 g, 0.20 mmol) ran for 18 h. Purification using medium pressure chromatography (eluent with a mixed ethyl acetate/petroleum ether

= 1/10) afforded **2c**. A yellow solid, 0.046 g, 50% yield; Mp: 182–183 °C; <sup>1</sup>H NMR (400 MHz, CDCl<sub>3</sub>) δ 7.68 (d, *J* = 8.0 Hz, 2H), 7.49-7.45 (m, 1H), 7.12 (s, 1H), 6.91 (d, *J* = 6.0 Hz, 1H), 6.75 (dd, *J* = 8.8, 6.4 Hz, 1H), 5.95 (dd, *J* = 8.4, 6.8 Hz, 1H), 5.22 (d, *J* = 6.4 Hz, 1H), 2.25 (s, 3H); <sup>13</sup>C NMR (100 MHz, CDCl<sub>3</sub>) δ 155.4, 149.3, 144.6, 134.1, 133.3, 131.9, 128.8, 128.3, 127.5, 121.8, 117.9, 114.4, 106.6, 103.5, 102.4, 66.5, 16.8; HRMS (ESI) *m/z* calcd for C<sub>17</sub>H<sub>12</sub>BrCl<sub>3</sub>N<sub>3</sub>O [M + H]<sup>+</sup>: 457.9224, found 457.9206.

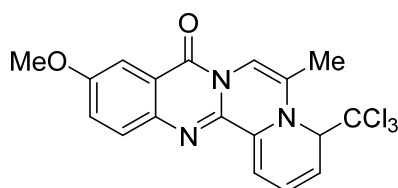

**2d**

**11-methoxy-6-methyl-4-(trichloromethyl)pyrido[2',1':3,4]pyrazino[2,1-b]quinazolin-9(4H)-one (2d).** **1d** (0.058 g, 0.20 mmol) ran for 12 h. Purification using medium pressure chromatography (eluent with a mixed ethyl acetate/petroleum ether = 1/6) afforded **2d**. A yellow solid, 0.041 g, 50% yield; Mp: 180–181 °C; <sup>1</sup>H NMR (400 MHz, CDCl<sub>3</sub>) δ 7.65-7.63 (m, 2H), 7.35 (dd, *J* = 9.2, 2.8 Hz, 1H), 7.14 (s, 1H), 6.85 (d, *J* = 5.6 Hz, 1H), 6.74 (dd, *J* = 9.2, 6.4 Hz, 1H), 5.92 (dd, *J* = 8.4, 6.4 Hz, 1H), 5.21 (d, *J* = 6.4 Hz, 1H), 3.93 (s, 3H), 2.26 (s, 3H); <sup>13</sup>C NMR (100 MHz, CDCl<sub>3</sub>) δ 158.5, 157.3, 142.2, 132.8, 129.3, 128.4, 128.3, 125.1, 120.8, 113.4, 106.1, 105.2, 103.8, 102.6, 66.6, 55.9, 16.7; HRMS (ESI) *m/z* calcd for C<sub>18</sub>H<sub>15</sub>Cl<sub>3</sub>N<sub>3</sub>O<sub>2</sub> [M + H]<sup>+</sup>: 410.0224, found 410.0211.

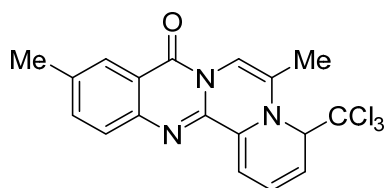

**2e**

**6,11-dimethyl-4-(trichloromethyl)pyrido[2',1':3,4]pyrazino[2,1-b]quinazolin-9(4H)-one (2e).** **1e** (0.055 g, 0.20 mmol) ran for 12 h. Purification using medium pressure chromatography (eluent with a mixed ethyl acetate/petroleum ether = 1/6) afforded **2e**. A yellow solid, 0.050 g, 64% yield; Mp: 186–187 °C; <sup>1</sup>H NMR (400 MHz, CDCl<sub>3</sub>) δ 8.09 (s, 1H), 7.62 (d, *J* = 8.4 Hz, 1H), 7.56 (d, *J* = 8.4 Hz, 1H), 7.14 (s, 1H),

6.88 (d,  $J = 6.0$  Hz, 1H), 6.75 (dd,  $J = 9.2, 6.4$  Hz, 1H), 5.93 (dd,  $J = 8.8, 6.8$  Hz, 1H), 5.22 (d,  $J = 6.4$  Hz, 1H), 2.49 (s, 3H), 2.26 (s, 3H);  $^{13}\text{C}$  NMR (100 MHz,  $\text{CDCl}_3$ )  $\delta$  157.5, 145.4, 143.4, 137.1, 136.0, 132.7, 128.4, 128.1, 127.5, 126.3, 119.7, 113.6, 105.5, 103.7, 102.6, 66.6, 21.4, 16.7; HRMS (ESI)  $m/z$  calcd for  $\text{C}_{18}\text{H}_{15}\text{Cl}_3\text{N}_3\text{O}$   $[\text{M} + \text{H}]^+$ : 394.0275, found 394.0275.

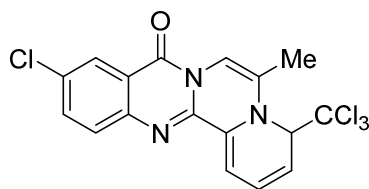

**2f**

**11-chloro-6-methyl-4-(trichloromethyl)pyrido[2',1':3,4]pyrazino[2,1-b]quinazolin-9(4H)-one (2f).** **1f** (0.059 g, 0.20 mmol) ran for 14 h. Purification using medium pressure chromatography (eluent with a mixed ethyl acetate/petroleum ether = 1/6) afforded **2f**. A yellow solid, 0.050 g, 60% yield; Mp: 201–202 °C;  $^1\text{H}$  NMR (400 MHz,  $\text{CDCl}_3$ )  $\delta$  8.25 (s, 1H), 7.69–7.64 (m, 2H), 7.10 (s, 1H), 6.92 (d,  $J = 6.0$  Hz, 1H), 6.76 (dd,  $J = 9.2, 6.4$  Hz, 1H), 5.96 (dd,  $J = 8.8, 6.4$  Hz, 1H), 5.22 (d,  $J = 6.4$  Hz, 1H), 2.26 (s, 3H);  $^{13}\text{C}$  NMR (100 MHz,  $\text{CDCl}_3$ )  $\delta$  156.4, 145.7, 144.4, 134.9, 132.6, 132.2, 129.2, 128.9, 128.4, 126.3, 120.8, 114.3, 106.5, 103.5, 102.4, 66.6, 16.7; HRMS (ESI)  $m/z$  calcd for  $\text{C}_{17}\text{H}_{12}\text{Cl}_4\text{N}_3\text{O}$   $[\text{M} + \text{H}]^+$ : 413.9729, found 413.9716.

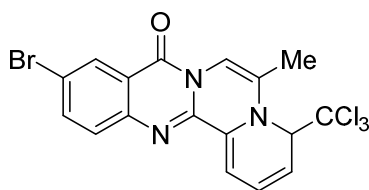

**2g**

**11-bromo-6-methyl-4-(trichloromethyl)pyrido[2',1':3,4]pyrazino[2,1-b]quinazolin-9(4H)-one (2g).** **1g** (0.068 g, 0.20 mmol) ran for 17 h. Purification using medium pressure chromatography (eluent with a mixed ethyl acetate/petroleum ether = 1/6) afforded **2g**. A yellow solid, 0.055 g, 60% yield; Mp: 196–197 °C;  $^1\text{H}$  NMR (400 MHz,  $\text{CDCl}_3$ )  $\delta$  8.41 (d,  $J = 2.0$  Hz, 1H), 7.80–7.77 (m, 1H), 7.58 (d,  $J = 8.8$  Hz, 1H), 7.09 (s, 1H), 6.89 (d,  $J = 6.0$  Hz, 1H), 6.75 (dd,  $J = 8.8, 6.0$  Hz, 1H), 5.96 (dd,  $J = 8.8, 6.4$  Hz, 1H), 5.21 (d,  $J = 6.0$  Hz, 1H), 2.26 (s, 3H);  $^{13}\text{C}$  NMR (100 MHz,  $\text{CDCl}_3$ )  $\delta$

156.3, 146.2, 144.5, 137.6, 132.3, 129.4, 129.3, 128.9, 128.4, 121.2, 120.2, 114.2, 106.4, 103.5, 102.4, 66.6, 16.7; HRMS (ESI)  $m/z$  calcd for  $C_{17}H_{12}BrCl_3N_3O$   $[M + H]^+$ : 457.9224, found 457.9212.

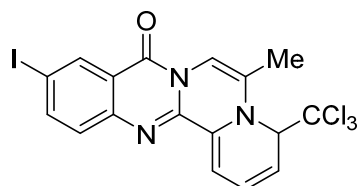

**2h**

**11-iodo-6-methyl-4-(trichloromethyl)pyrido[2',1':3,4]pyrazino[2,1-b]quinazolin-9(4H)-one (2h).** **1h** (0.077 g, 0.20 mmol) ran for 14 h. Purification using medium pressure chromatography (eluent with a mixed ethyl acetate/petroleum ether = 1/6) afforded **2h**. A yellow solid, 0.056 g, 55% yield; Mp: 191–192 °C;  $^1H$  NMR (400 MHz,  $CDCl_3$ )  $\delta$  8.60 (s, 1H), 7.96–7.94 (m, 1H), 7.41 (d,  $J = 8.8$  Hz, 1H), 7.08 (s, 1H), 6.87 (d,  $J = 6.0$  Hz, 1H), 6.74 (dd,  $J = 9.2, 6.4$  Hz, 1H), 5.95 (dd,  $J = 8.8, 6.4$  Hz, 1H), 5.21 (d,  $J = 6.0$  Hz, 1H), 2.25 (s, 3H);  $^{13}C$  NMR (100 MHz,  $CDCl_3$ )  $\delta$  156.1, 146.7, 144.7, 143.1, 135.7, 132.4, 129.4, 128.7, 128.4, 121.5, 114.2, 106.3, 103.6, 102.4, 91.0, 66.6, 16.7; HRMS (ESI)  $m/z$  calcd for  $C_{17}H_{12}Cl_3IN_3O$   $[M + H]^+$ : 505.9085, found 505.9069.

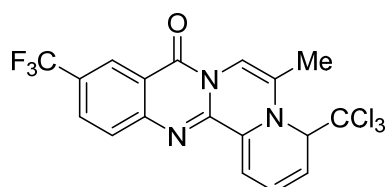

**2i**

**6-methyl-4-(trichloromethyl)-11-(trifluoromethyl)pyrido[2',1':3,4]pyrazino[2,1-b]quinazolin-9(4H)-one (2i).** **1i** (0.066 g, 0.20 mmol) ran for 20.5 h. Purification using medium pressure chromatography (eluent with a mixed ethyl acetate/petroleum ether = 1/10) afforded **2i**. A yellow solid, 0.041 g, 46% yield; Mp: 189–190 °C;  $^1H$  NMR (400 MHz,  $CDCl_3$ )  $\delta$  8.57 (s, 1H), 7.91 (d,  $J = 7.6$  Hz, 1H), 7.78 (d,  $J = 8.8$  Hz, 1H), 7.11 (s, 1H), 6.93 (d,  $J = 6.0$  Hz, 1H), 6.77 (dd,  $J = 8.8, 6.4$  Hz, 1H), 5.98 (dd,  $J = 8.8, 6.8$  Hz, 1H), 5.23 (d,  $J = 6.4$  Hz, 1H), 2.27 (s, 3H);  $^{13}C$  NMR (100 MHz,  $CDCl_3$ )  $\delta$  156.9, 149.6, 145.9, 132.2, 130.4 (q,  $J = 2.9$  Hz), 129.2 (q,  $J = 27.0$  Hz), 128.6, 128.3 (q,  $J = 8.8$  Hz), 128.2, 125.0 (d,  $J = 4.4$  Hz), 122.3 (q,  $J = 270.5$  Hz), 119.7, 114.6,

107.0, 103.5, 102.3, 66.5, 16.7;  $^{19}\text{F}$  NMR (376 MHz,  $\text{CDCl}_3$ )  $\delta$  -62.4; HRMS (ESI)  $m/z$  calcd for  $\text{C}_{18}\text{H}_{12}\text{Cl}_3\text{F}_3\text{N}_3\text{O}$   $[\text{M} + \text{H}]^+$ : 447.9993, found 447.9986.

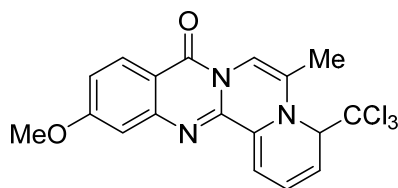

**2j**

**12-methoxy-6-methyl-4-(trichloromethyl)pyrido[2',1':3,4]pyrazino[2,1-b]quinazolin-9(4H)-one (2j).** **1j** (0.058 g, 0.20 mmol) ran for 21.5 h. Purification using medium pressure chromatography (eluent with a mixed ethyl acetate/petroleum ether = 1/6) afforded **2j**. A yellow solid, 0.044 g, 54% yield; Mp: 174–175 °C;  $^1\text{H}$  NMR (400 MHz,  $\text{CDCl}_3$ )  $\delta$  8.19 (d,  $J$  = 8.8 Hz, 1H), 7.21 (s, 1H), 7.13 (s, 1H), 7.05 (s, 1H), 7.04–6.98 (m, 1H), 6.76 (dd,  $J$  = 8.8, 6.4 Hz, 1H), 5.95 (dd,  $J$  = 8.4, 6.4 Hz, 1H), 5.22 (d,  $J$  = 6.4 Hz, 1H), 3.92 (s, 3H), 2.26 (s, 3H);  $^{13}\text{C}$  NMR (100 MHz,  $\text{CDCl}_3$ )  $\delta$  164.9, 156.8, 149.0, 144.9, 132.1, 128.6, 128.4, 128.2, 117.6, 114.1, 113.3, 107.4, 106.4, 103.6, 102.5, 66.6, 55.8, 16.7; HRMS (ESI)  $m/z$  calcd for  $\text{C}_{18}\text{H}_{15}\text{Cl}_3\text{N}_3\text{O}_2$   $[\text{M} + \text{H}]^+$ : 410.0224, found 410.0211.

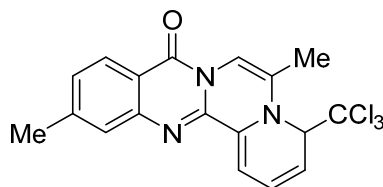

**2k**

**6,12-dimethyl-4-(trichloromethyl)pyrido[2',1':3,4]pyrazino[2,1-b]quinazolin-9(4H)-one (2k).** **1k** (0.055 g, 0.20 mmol) ran for 20.5 h. Purification using medium pressure chromatography (eluent with a mixed ethyl acetate/petroleum ether = 1/6) afforded **2k**. A yellow solid, 0.049 g, 62% yield; Mp: 185–186 °C;  $^1\text{H}$  NMR (400 MHz,  $\text{CDCl}_3$ )  $\delta$  8.19 (d,  $J$  = 8.0 Hz, 1H), 7.52 (s, 1H), 7.29–7.26 (m, 1H), 7.13 (s, 1H), 6.91 (d,  $J$  = 6.0 Hz, 1H), 6.76 (dd,  $J$  = 8.8, 6.0 Hz, 1H), 5.94 (dd,  $J$  = 8.8, 6.4 Hz, 1H), 5.22 (d,  $J$  = 6.4 Hz, 1H), 2.49 (s, 3H), 2.26 (s, 3H);  $^{13}\text{C}$  NMR (100 MHz,  $\text{CDCl}_3$ )  $\delta$  157.4, 147.4, 145.6, 144.3, 132.6, 128.5, 128.4, 128.1, 127.3, 126.8, 117.5, 113.8, 105.8, 103.7, 102.6, 66.6, 21.9, 16.7; HRMS (ESI)  $m/z$  calcd for  $\text{C}_{18}\text{H}_{15}\text{Cl}_3\text{N}_3\text{O}$   $[\text{M} + \text{H}]^+$ : 394.0275,

found 394.0266.

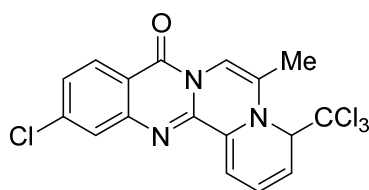

**2l**

**12-chloro-6-methyl-4-(trichloromethyl)pyrido[2',1':3,4]pyrazino[2,1-b]quinazolin-9(4H)-one (2l).** **1l** (0.059 g, 0.20 mmol) ran for 20.5 h. Purification using medium pressure chromatography (eluent with a mixed ethyl acetate/petroleum ether = 1/6) afforded **2l**. A black solid, 0.051 g, 62% yield; Mp: 220–221 °C; <sup>1</sup>H NMR (400 MHz, CDCl<sub>3</sub>) δ 8.22 (d, *J* = 8.4 Hz, 1H), 7.70 (s, 1H), 7.40 (dd, *J* = 8.8, 1.6 Hz, 1H), 7.09 (s, 1H), 6.90 (d, *J* = 6.0 Hz, 1H), 6.76 (dd, *J* = 9.2, 6.4 Hz, 1H), 5.96 (dd, *J* = 8.4, 6.4 Hz, 1H), 5.22 (d, *J* = 6.4 Hz, 1H), 2.26 (s, 3H); <sup>13</sup>C NMR (100 MHz, CDCl<sub>3</sub>) δ 156.9, 148.3, 145.3, 140.7, 132.3, 128.7, 128.4, 128.3, 127.3, 127.0, 118.3, 114.3, 106.5, 103.6, 102.3, 66.5, 16.7; HRMS (ESI) *m/z* calcd for C<sub>17</sub>H<sub>12</sub>Cl<sub>4</sub>N<sub>3</sub>O [M + H]<sup>+</sup>: 413.9729, found 413.9720.

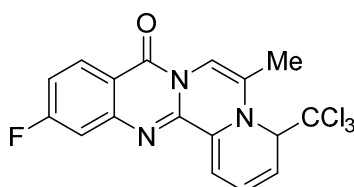

**2m**

**12-fluoro-6-methyl-4-(trichloromethyl)pyrido[2',1':3,4]pyrazino[2,1-b]quinazolin-9(4H)-one (2m).** **1m** (0.056 g, 0.20 mmol) ran for 21.5 h. Purification using medium pressure chromatography (eluent with a mixed ethyl acetate/petroleum ether = 1/10) afforded **2m**. A yellow solid, 0.040 g, 50% yield; Mp: 173–174 °C; <sup>1</sup>H NMR (400 MHz, CDCl<sub>3</sub>) δ 8.32 (dd, *J* = 8.8, 6.4 Hz, 1H), 7.37 (d, *J* = 9.6 Hz, 1H), 7.19–7.14 (m, 1H), 7.11 (s, 1H), 6.93 (d, *J* = 6.0 Hz, 1H), 6.76 (dd, *J* = 9.2, 6.4 Hz, 1H), 5.96 (dd, *J* = 8.4, 6.8 Hz, 1H), 5.23 (d, *J* = 6.4 Hz, 1H), 2.27 (s, 3H); <sup>13</sup>C NMR (150 MHz, CDCl<sub>3</sub>) δ 167.4, 165.8, 156.8, 149.5 (d, *J* = 13.5 Hz), 145.4, 132.2, 129.8 (d, *J* = 10.5 Hz), 128.6 (d, *J* = 36.0 Hz), 116.7, 115.8 (d, *J* = 24.0 Hz), 114.3, 112.7 (d, *J* = 21.0



Hz), 106.6, 103.6, 102.3, 66.6, 16.7;  $^{19}\text{F}$  NMR (376 MHz,  $\text{CDCl}_3$ )  $\delta$  -102.8; HRMS (ESI)  $m/z$  calcd for  $\text{C}_{17}\text{H}_{12}\text{Cl}_3\text{FN}_3\text{O}$   $[\text{M} + \text{H}]^+$ : 398.0024, found 398.0021.

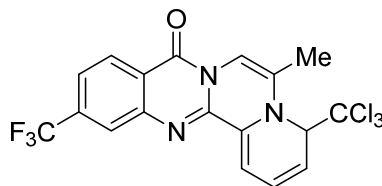

**2n**

**6-methyl-4-(trichloromethyl)-12-(trifluoromethyl)pyrido[2',1':3,4]pyrazino[2,1-b]quinazolin-9(4H)-one (2n).** **1n** (0.066 g, 0.20 mmol) ran for 20.5 h. Purification using medium pressure chromatography (eluents with a mixed ethyl acetate/petroleum ether = 1/10) afforded **2n**. A yellow solid, 0.055 g, 62% yield; Mp: 210–211 °C;  $^1\text{H}$  NMR (400 MHz,  $\text{CDCl}_3$ )  $\delta$  8.40 (d,  $J$  = 8.8 Hz, 1H), 7.97 (s, 1H), 7.63 (d,  $J$  = 8.4 Hz, 1H), 7.10 (s, 1H), 6.92 (d,  $J$  = 6.0 Hz, 1H), 6.76 (dd,  $J$  = 8.8, 6.4 Hz, 1H), 5.97 (dd,  $J$  = 8.8, 6.4 Hz, 1H), 5.22 (d,  $J$  = 6.4 Hz, 1H), 2.27 (s, 3H);  $^{13}\text{C}$  NMR (100 MHz,  $\text{CDCl}_3$ )  $\delta$  156.7, 147.4, 145.4, 136.3 (q,  $J$  = 32.9 Hz), 132.1, 129.2, 128.3 (q,  $J$  = 8.8 Hz), 127.4 (q,  $J$  = 271.2 Hz), 125.2 (q,  $J$  = 4.4 Hz), 122.5 (q,  $J$  = 2.9 Hz), 122.1, 122.0, 114.6, 106.7, 103.5, 102.3, 66.5, 16.7;  $^{19}\text{F}$  NMR (376 MHz,  $\text{CDCl}_3$ )  $\delta$  -63.3; HRMS (ESI)  $m/z$  calcd for  $\text{C}_{18}\text{H}_{12}\text{Cl}_3\text{F}_3\text{N}_3\text{O}$   $[\text{M} + \text{H}]^+$ : 447.9993, found 447.9984.

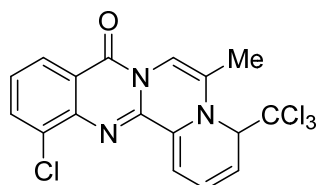

**2o**

**13-chloro-6-methyl-4-(trichloromethyl)pyrido[2',1':3,4]pyrazino[2,1-b]quinazolin-9(4H)-one (2o).** **1o** (0.059 g, 0.20 mmol) ran for 20.5 h. Purification using medium pressure chromatography (eluents with a mixed ethyl acetate/petroleum ether = 1/10) afforded **2o**. A yellow solid, 0.044 g, 53% yield; Mp: 202–203 °C;  $^1\text{H}$  NMR (400 MHz,  $\text{CDCl}_3$ )  $\delta$  8.21 (d,  $J$  = 8.0 Hz, 1H), 7.81 (d,  $J$  = 7.6 Hz, 1H), 7.36–7.32 (m, 1H), 7.08 (s, 1H), 7.04 (d,  $J$  = 6.0 Hz, 1H), 6.77 (dd,  $J$  = 8.8, 6.4 Hz, 1H), 5.95 (dd,  $J$  = 8.8, 6.4 Hz, 1H), 5.23 (d,  $J$  = 6.0 Hz, 1H), 2.27 (s, 3H);  $^{13}\text{C}$  NMR (100 MHz,  $\text{CDCl}_3$ )  $\delta$  157.1, 144.6, 144.2, 134.6, 132.4, 132.1, 128.9, 128.5, 126.5, 125.8, 121.5, 114.0,

106.7, 103.6, 102.4, 66.6, 16.8; HRMS (ESI)  $m/z$  calcd for  $C_{17}H_{12}Cl_4N_3O$   $[M + H]^+$ : 413.9729, found 413.9714.

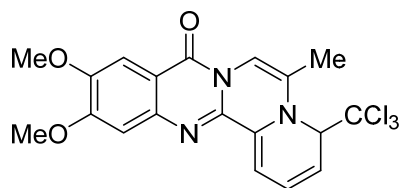

**2p**

**11,12-dimethoxy-6-methyl-4-(trichloromethyl)pyrido[2',1':3,4]pyrazino[2,1-b]quinazolin-9(4H)-one (2p).** **1p** (0.064 g, 0.20 mmol) ran for 21 h. Purification using medium pressure chromatography (eluent with a mixed ethyl acetate/petroleum ether = 1/6) afforded **2p**. A yellow solid, 0.054 g, 62% yield; Mp: 190–191 °C;  $^1H$  NMR (400 MHz,  $CDCl_3$ )  $\delta$  7.61 (s, 1H), 7.19 (s, 1H), 7.16 (s, 1H), 6.89 (d,  $J = 6.0$  Hz, 1H), 6.76 (dd,  $J = 9.2, 6.8$  Hz, 1H), 5.93 (dd,  $J = 8.8, 6.8$  Hz, 1H), 5.23 (d,  $J = 6.0$  Hz, 1H), 4.01 (s, 6H), 2.27 (s, 3H);  $^{13}C$  NMR (150 MHz,  $CDCl_3$ )  $\delta$  156.6, 155.3, 149.4, 143.5, 143.1, 132.5, 128.4, 128.3, 113.6, 113.4, 107.7, 105.8, 105.4, 103.7, 102.7, 66.6, 56.4, 56.3, 16.7; HRMS (ESI)  $m/z$  calcd for  $C_{19}H_{17}Cl_3N_3O_3$   $[M + H]^+$ : 440.0330, found 440.0333.

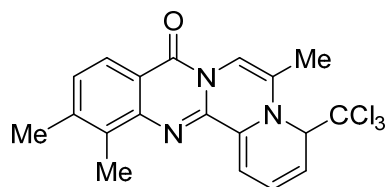

**2q**

**6,12,13-trimethyl-4-(trichloromethyl)pyrido[2',1':3,4]pyrazino[2,1-b]quinazolin-9(4H)-one (2q).** **1q** (0.058 g, 0.20 mmol) ran for 20.5 h. Purification using medium pressure chromatography (eluent with a mixed ethyl acetate/petroleum ether = 1/10) afforded **2q**. A yellow solid, 0.050 g, 61% yield; Mp: 221–222 °C;  $^1H$  NMR (400 MHz,  $CDCl_3$ )  $\delta$  8.06 (d,  $J = 8.0$  Hz, 1H), 7.27 (d,  $J = 8.0$  Hz, 1H), 7.12 (s, 1H), 6.95 (d,  $J = 6.0$  Hz, 1H), 6.76 (dd,  $J = 9.2, 6.4$  Hz, 1H), 5.92 (dd,  $J = 8.4, 6.4$  Hz, 1H), 5.23 (d,  $J = 6.4$  Hz, 1H), 2.58 (s, 3H), 2.43 (s, 3H), 2.26 (s, 3H);  $^{13}C$  NMR (100 MHz,  $CDCl_3$ )  $\delta$  158.0, 145.6, 143.5, 142.7, 134.0, 133.1, 128.9, 128.5, 127.8, 123.8, 117.9, 113.2, 105.2, 103.9, 102.7, 66.7, 21.0, 16.7, 13.1; HRMS (ESI)  $m/z$  calcd for  $C_{19}H_{17}Cl_3N_3O$   $[M + H]^+$ : 408.0432, found 408.0417.

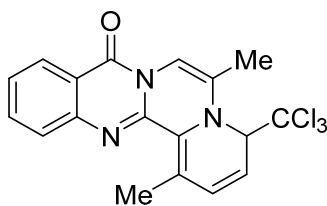

**2r**

**1,6-dimethyl-4-(trichloromethyl)pyrido[2',1':3,4]pyrazino[2,1-b]quinazolin-9(4H)-one (2r).** **1r** (0.055 g, 0.20 mmol) ran for 40 h. Purification using medium pressure chromatography (eluents with a mixed ethyl acetate/petroleum ether = 1/6) afforded **2r**. A yellow solid, 0.030 g, 38% yield; Mp: 235–236 °C; <sup>1</sup>H NMR (500 MHz, CDCl<sub>3</sub>) δ 8.32 (d, *J* = 7.5 Hz, 1H), 7.75-7.70 (m, 2H), 7.48-7.45 (m, 1H), 7.07 (s, 1H), 6.50 (d, *J* = 9.0 Hz, 1H), 6.04 (dd, *J* = 8.5, 6.5 Hz, 1H), 5.05 (d, *J* = 6.5 Hz, 1H), 2.48 (s, 3H), 2.19 (s, 3H); <sup>13</sup>C NMR (125 MHz, CDCl<sub>3</sub>) δ 157.3, 146.9, 144.4, 134.3, 134.1, 130.3, 127.6, 126.9, 126.8, 126.1, 120.1, 119.7, 116.5, 102.6, 102.0, 65.9, 20.2, 16.8; HRMS (ESI) *m/z* calcd for C<sub>18</sub>H<sub>15</sub>Cl<sub>3</sub>N<sub>3</sub>O [M + H]<sup>+</sup>: 394.0275, found 394.0275.

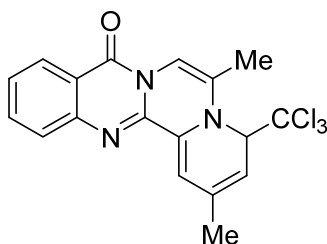

**2s**

**2,6-dimethyl-4-(trichloromethyl)pyrido[2',1':3,4]pyrazino[2,1-b]quinazolin-9(4H)-one (2s).** **1s** (0.055 g, 0.20 mmol) ran for 15.5 h. Purification using medium pressure chromatography (eluents with a mixed ethyl acetate/petroleum ether = 1/6) afforded **2s**. A yellow solid, 0.041 g, 52% yield; Mp: 170–171 °C; <sup>1</sup>H NMR (400 MHz, CDCl<sub>3</sub>) δ 8.31 (d, *J* = 8.0 Hz, 1H), 7.75-7.70 (m, 2H), 7.47-7.43 (m, 1H), 7.10 (s, 1H), 6.79 (s, 1H), 5.67 (d, *J* = 6.0 Hz, 1H), 5.14 (d, *J* = 6.4 Hz, 1H), 2.25 (s, 3H), 2.10 (s, 3H); <sup>13</sup>C NMR (100 MHz, CDCl<sub>3</sub>) δ 157.5, 147.4, 144.3, 137.6, 134.4, 132.0, 128.4, 127.6, 127.0, 126.7, 120.0, 110.0, 109.0, 104.3, 102.0, 67.2, 20.6, 16.7; HRMS (ESI) *m/z* calcd for C<sub>18</sub>H<sub>15</sub>Cl<sub>3</sub>N<sub>3</sub>O [M + H]<sup>+</sup>: 394.0275, found 394.0265.

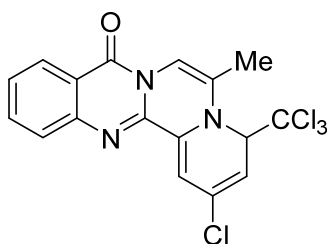

**2t**

**2-chloro-6-methyl-4-(trichloromethyl)pyrido[2',1':3,4]pyrazino[2,1-b]quinazolin-9(4H)-one (2t).** **1t** (0.059 g, 0.20 mmol) ran for 22.5 h. Purification using medium pressure chromatography (eluents with a mixed ethyl acetate/petroleum ether = 1/6) afforded **2t**. A yellow solid, 0.040 g, 48% yield; Mp: 215–216 °C; <sup>1</sup>H NMR (400 MHz, CDCl<sub>3</sub>) δ 8.31 (d, *J* = 6.4 Hz, 1H), 7.77 (s, 1H), 7.76 (s, 1H), 7.50–7.48 (m, 1H), 7.18 (s, 1H), 6.93 (s, 1H), 5.92 (d, *J* = 4.8 Hz, 1H), 5.25 (d, *J* = 5.2 Hz, 1H), 2.28 (s, 3H); <sup>13</sup>C NMR (100 MHz, CDCl<sub>3</sub>) δ 157.3, 146.9, 143.0, 134.8, 134.7, 133.9, 127.6, 127.5, 127.3, 127.1, 119.9, 109.3, 106.9, 103.2, 103.1, 68.1, 16.8; HRMS (ESI) *m/z* calcd for C<sub>17</sub>H<sub>12</sub>Cl<sub>4</sub>N<sub>3</sub>O [M + H]<sup>+</sup>: 413.9729, found 413.9717.

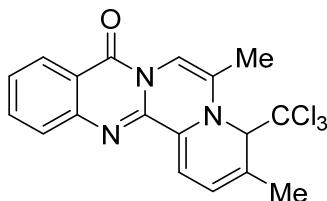

**2u**

**3,6-dimethyl-4-(trichloromethyl)pyrido[2',1':3,4]pyrazino[2,1-b]quinazolin-9(4H)-one (2u).** **1u** (0.055 g, 0.20 mmol) ran for 22 h. Purification using medium pressure chromatography (eluents with a mixed ethyl acetate/petroleum ether = 1/6) afforded **2u**. A yellow solid, 0.020 g, 25% yield; Mp: 197–198 °C; <sup>1</sup>H NMR (400 MHz, CDCl<sub>3</sub>) δ 8.29 (d, *J* = 7.6 Hz, 1H), 7.82–7.73 (m, 2H), 7.48–7.44 (m, 1H), 7.04 (s, 1H), 6.76 (s, 1H), 6.70 (d, *J* = 6.4 Hz, 1H), 4.29 (d, *J* = 6.4 Hz, 1H), 2.18 (s, 6H); <sup>13</sup>C NMR (100 MHz, CDCl<sub>3</sub>) δ 157.4, 146.6, 142.3, 134.6, 131.5, 127.5, 127.0, 126.9, 124.9, 123.7, 119.5, 111.3, 105.3, 100.2, 97.9, 60.3, 21.6, 17.0; HRMS (ESI) *m/z* calcd for C<sub>18</sub>H<sub>15</sub>Cl<sub>3</sub>N<sub>3</sub>O [M + H]<sup>+</sup>: 394.0275, found 394.0265.

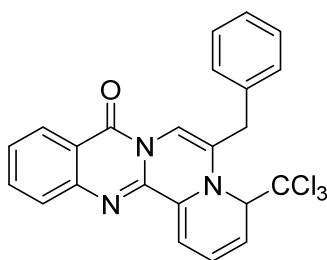

**2v**

**6-benzyl-4-(trichloromethyl)pyrido[2',1':3,4]pyrazino[2,1-b]quinazolin-9(4H)-one (2v).** **1v** (0.067 g, 0.20 mmol) ran for 48 h. Purification using medium pressure chromatography (eluent with a mixed ethyl acetate/petroleum ether = 1/10) afforded **2v**. A black solid, 0.028 g, 31% yield; Mp: 272–273 °C; <sup>1</sup>H NMR (400 MHz, CDCl<sub>3</sub>) δ 8.31 (d, *J* = 8.0 Hz, 1H), 7.80–7.74 (m, 2H), 7.50–7.46 (m, 1H), 7.35–7.32 (m, 2H), 7.29 (d, *J* = 7.2 Hz, 2H), 7.23 (d, *J* = 7.2 Hz, 2H), 6.97 (d, *J* = 6.0 Hz, 1H), 6.60 (dd, *J* = 8.8, 6.0 Hz, 1H), 5.55 (dd, *J* = 9.2, 7.2 Hz, 1H), 5.07 (d, *J* = 6.4 Hz, 1H), 4.13 (d, *J* = 17.2 Hz, 1H), 3.95 (d, *J* = 17.2 Hz, 1H); <sup>13</sup>C NMR (100 MHz, CDCl<sub>3</sub>) δ 157.5, 147.0, 144.5, 135.2, 134.7, 131.9, 130.8, 129.1, 128.1, 127.9, 127.5, 127.4, 127.1, 127.0, 119.9, 114.5, 106.9, 104.3, 103.6, 66.7, 35.8; HRMS (ESI) *m/z* calcd for C<sub>23</sub>H<sub>17</sub>Cl<sub>3</sub>N<sub>3</sub>O [M + H]<sup>+</sup>: 456.0432, found 456.0425.

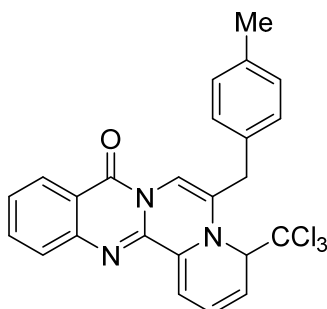

**2w**

**6-(4-methylbenzyl)-4-(trichloromethyl)pyrido[2',1':3,4]pyrazino[2,1-b]quinazolin-9(4H)-one (2w).** **1w** (0.070 g, 0.20 mmol) ran for 48 h. Purification using medium pressure chromatography (eluent with a mixed ethyl acetate/petroleum ether = 1/10) afforded **2w**. A yellow solid, 0.019 g, 20% yield; Mp: 180–181 °C; <sup>1</sup>H NMR (400 MHz, CDCl<sub>3</sub>) δ 8.32 (d, *J* = 8.0 Hz, 1H), 7.76 (d, *J* = 4.0 Hz, 2H), 7.49–7.45 (m, 1H), 7.23 (s, 1H), 7.14–7.08 (m, 4H), 6.94 (d, *J* = 6.0 Hz, 1H), 6.60 (dd, *J* = 9.2, 6.4

Hz, 1H), 5.57 (dd,  $J = 9.2, 6.8$  Hz, 1H), 5.10 (d,  $J = 6.4$  Hz, 1H), 4.08 (d,  $J = 17.2$  Hz, 1H), 3.90 (d,  $J = 16.8$  Hz, 1H), 2.33 (s, 3H);  $^{13}\text{C}$  NMR (100 MHz,  $\text{CDCl}_3$ )  $\delta$  157.6, 147.3, 144.4, 137.0, 134.6, 132.4, 132.1, 132.0, 131.0, 129.7, 127.9, 127.6, 127.1, 126.9, 120.1, 114.4, 106.5, 104.2, 103.7, 66.7, 35.4, 21.1; HRMS (ESI)  $m/z$  calcd for  $\text{C}_{24}\text{H}_{19}\text{Cl}_3\text{N}_3\text{O}$   $[\text{M} + \text{H}]^+$ : 470.0588, found 470.0574.

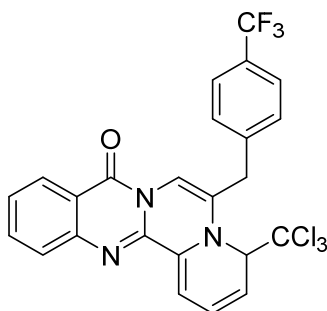

**2x**

**4-(trichloromethyl)-6-(4-(trifluoromethyl)benzyl)pyrido[2',1':3,4]pyrazino[2,1-b]quinazolin-9(4H)-one (2x).** **1x** (0.081 g, 0.20 mmol) ran for 48 h. Purification using medium pressure chromatography (eluent with a mixed ethyl acetate/petroleum ether = 1/10) afforded **2x**. A yellow solid, 0.035 g, 33% yield; Mp: 205–206 °C;  $^1\text{H}$  NMR (400 MHz,  $\text{CDCl}_3$ )  $\delta$  8.32 (d,  $J = 8.0$  Hz, 1H), 7.77 (d,  $J = 3.2$  Hz, 2H), 7.61 (d,  $J = 8.0$  Hz, 2H), 7.50-7.46 (m, 1H), 7.36 (d,  $J = 8.0$  Hz, 2H), 7.27 (s, 1H), 6.97 (d,  $J = 6.0$  Hz, 1H), 6.63 (dd,  $J = 9.2, 6.4$  Hz, 1H), 5.59 (dd,  $J = 8.8, 6.4$  Hz, 1H), 4.96 (d,  $J = 6.4$  Hz, 1H), 4.22 (d,  $J = 17.2$  Hz, 1H), 3.98 (d,  $J = 17.2$  Hz, 1H);  $^{13}\text{C}$  NMR (100 MHz,  $\text{CDCl}_3$ )  $\delta$  157.6, 147.2, 144.2, 139.4, 134.8, 132.0, 130.3 (q,  $J = 32.1$  Hz), 129.7, 128.4, 128.2, 128.0 (q,  $J = 270.6$  Hz), 127.6, 127.1, 126.0 (q,  $J = 3.6$  Hz), 122.9 (q,  $J = 34.3$  Hz), 119.9, 114.4, 106.9, 104.8, 103.5, 66.7, 35.5;  $^{19}\text{F}$  NMR (376 MHz,  $\text{CDCl}_3$ )  $\delta$  -62.5; HRMS (ESI)  $m/z$  calcd for  $\text{C}_{24}\text{H}_{16}\text{Cl}_3\text{F}_3\text{N}_3\text{O}$   $[\text{M} + \text{H}]^+$ : 524.0306, found 524.0290.

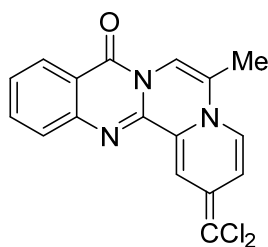

**2aa**

**2-(dichloromethylene)-6-methylpyrido[2',1':3,4]pyrazino[2,1-b]quinazolin-**

**9(2H)-one (2aa).** **1a** (0.052 g, 0.20 mmol) with  $\text{CHBrCl}_2$  (2 mL) ran for 16 h. Purification using medium pressure chromatography (eluent with a mixed ethyl acetate/petroleum ether = 1/10) afforded **2aa**. A yellow solid, 0.010 g, 15% yield; Mp: 227–228 °C;  $^1\text{H}$  NMR (600 MHz,  $\text{CDCl}_3$ )  $\delta$  8.36 (d,  $J$  = 9.6 Hz, 1H), 7.79–7.74 (m, 2H), 7.72 (s, 1H), 7.60 (d,  $J$  = 4.2 Hz, 1H), 7.44–7.41 (m, 1H), 7.17 (s, 1H), 7.03 (d,  $J$  = 4.2 Hz, 1H), 2.64 (s, 3H);  $^{13}\text{C}$  NMR (150 MHz,  $\text{CDCl}_3$ )  $\delta$  157.9, 148.4, 141.1, 134.8, 127.2, 127.1, 126.3, 125.9, 125.4, 124.0, 122.4, 119.9, 118.0, 117.0, 112.0, 107.1, 19.0; HRMS (ESI)  $m/z$  calcd for  $\text{C}_{17}\text{H}_{12}\text{Cl}_2\text{N}_3\text{O}$   $[\text{M} + \text{H}]^+$ : 344.0352, found 344.0341.

### 3. Gram scalable preparation of 2a

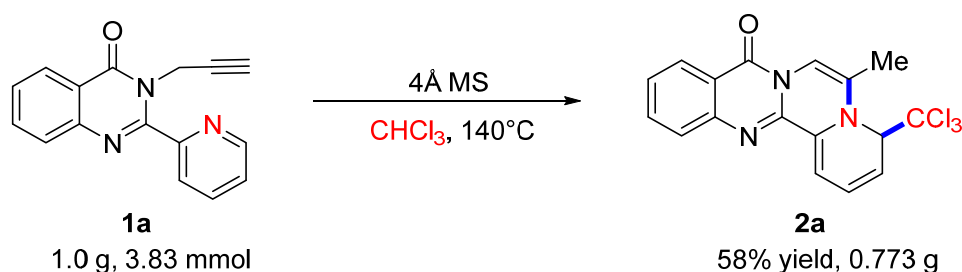

A 100 mL reaction flask was charged with **1a** (1.0 g, 3.83 mmol) and 4 Å MS (9.6 g).  $\text{CHCl}_3$  (40 mL) was then added via syringe and the reaction vessel was sealed with a Teflon cap. The reaction mixture was heated at 140 °C in an oil bath for 16 h until **1a** was consumed completely (monitored by TLC). At this time, the solvent was removed under reduced pressure and the crude product was purified by flash column chromatography (1/10 to 1/6, ethyl acetate/petroleum ether) to afford 4-(trichloromethyl)pyrido[2',1':3,4]pyrazino [2,1-b]quinazolinones **2a** (0.773 g, 58% yield).

### 4. Synthesis of compounds 3a-5a

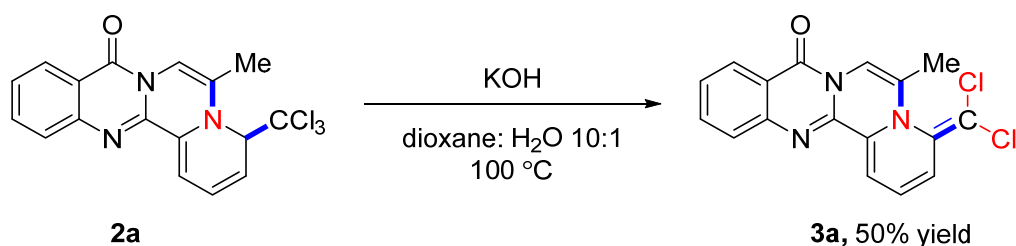

A 25 mL reaction flask was charged with **2a** (0.076 g, 0.2 mmol) and KOH (0.112 g,

10 equiv.). 1,4-dioxane (2 mL) and H<sub>2</sub>O (0.2 mL) were then added via syringe and the reaction vessel was sealed with a Teflon cap. The reaction mixture was heated at 100 °C in an oil bath for 3 h until **2a** was consumed completely (monitored by TLC). At this time, the solvent was removed under reduced pressure and the crude product was purified by flash column chromatography (1/10, ethyl acetate/petroleum ether) to afford 4-(dichloromethylene)-6-methylpyrido[2',1':3,4]pyrazino[2,1-b]quinazolin-9(4H)-one **3a**.

**4-(dichloromethylene)-6-methylpyrido[2',1':3,4]pyrazino[2,1-b]quinazolin-9(4H)-one (3a)**. A reddish brown solid, 0.034 g, 50% yield; Mp: 261–262 °C; <sup>1</sup>H NMR (500 MHz, CDCl<sub>3</sub>) δ 8.32 (d, *J* = 7.5 Hz, 1H), 7.77-7.74 (m, 1H), 7.71 (d, *J* = 8.0 Hz, 1H), 7.49-7.46 (m, 1H), 7.17 (s, 1H), 7.02 (d, *J* = 6.5 Hz, 1H), 6.74 (d, *J* = 9.5 Hz, 1H), 6.52 (dd, *J* = 10.0, 6.5 Hz, 1H), 2.12 (s, 3H); <sup>13</sup>C NMR (125 MHz, CDCl<sub>3</sub>) δ 157.6, 147.3, 143.9, 134.7, 134.6, 132.5, 127.7, 127.5, 127.1, 127.0, 125.5, 122.4, 120.1, 108.4, 105.3, 103.5, 16.8; HRMS (ESI) *m/z* calcd for C<sub>17</sub>H<sub>12</sub>Cl<sub>2</sub>N<sub>3</sub>O [M + H]<sup>+</sup>: 344.0352, found 344.0366.

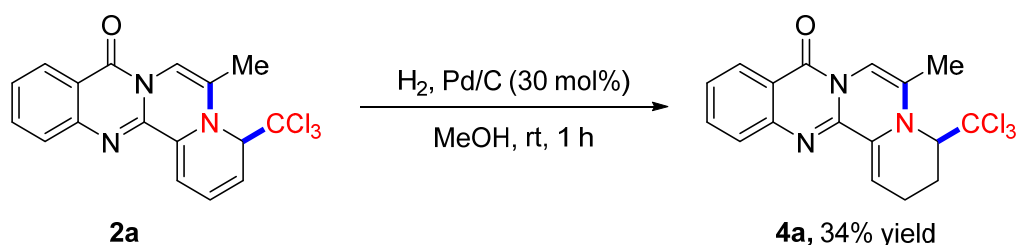

A Schlenk flask was charged with **2a** (0.076 g, 0.20 mmol), MeOH (2.0 mL) and Pd/C (30%, 0.023 g). Then, the reaction mixture was performed in the presence of hydrogen (A balloon filled with hydrogen). The reaction mixture was stirred at room temperature for 1 h until **2a** was consumed completely (monitored by TLC). After completion, the mixture was filtered and the filtrate was concentrated under reduced pressure. The crude product was purified by flash column chromatography (1/5, ethyl acetate/petroleum ether) to afford 6-methyl-4-(trichloromethyl)-3,4-dihydropyrido[2',1':3,4]pyrazino[2,1-b]quinazolin-9(2H)-one **4a**.

**6-methyl-4-(trichloromethyl)-3,4-dihydropyrido[2',1':3,4]pyrazino[2,1-**



**b]quinazolin-9(2H)-one (4a).** A yellow solid, 0.026 g, 34% yield; Mp: 173–174 °C; <sup>1</sup>H NMR (500 MHz, CDCl<sub>3</sub>) δ 8.27 (d, *J* = 8.0 Hz, 1H), 7.70 (d, *J* = 4.0 Hz, 2H), 7.44–7.40 (m, 1H), 6.80 (s, 1H), 6.53 (s, 1H), 4.61 (d, *J* = 5.0 Hz, 1H), 2.90–2.85 (m, 1H), 2.77–2.68 (m, 1H), 2.50–2.44 (m, 1H), 2.17 (s, 3H), 2.08–2.00 (m, 1H); <sup>13</sup>C NMR (125 MHz, CDCl<sub>3</sub>) δ 157.6, 147.2, 145.1, 134.2, 130.8, 129.2, 127.4, 126.9, 126.6, 120.1, 108.3, 102.4, 98.3, 64.6, 21.7, 19.3, 17.5; HRMS (ESI) *m/z* calcd for C<sub>17</sub>H<sub>15</sub>Cl<sub>3</sub>N<sub>3</sub>O [M + H]<sup>+</sup>: 382.0275, found 382.0294.

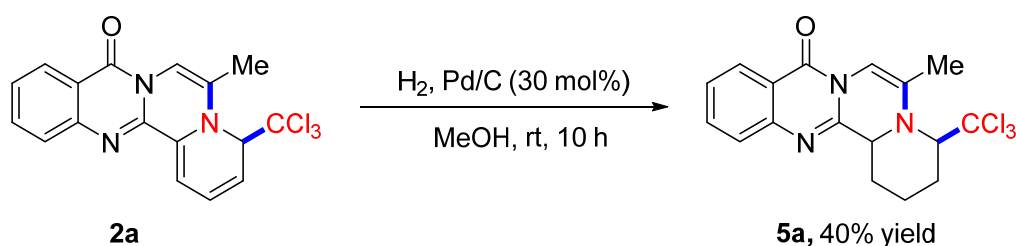

A Schlenk flask was charged with **2a** (0.076 g, 0.20 mmol), MeOH (2.0 mL) and Pd/C (30%, 0.023 g). Then, the reaction mixture was performed in the presence of hydrogen (A balloon filled with hydrogen). The reaction mixture was stirred at room temperature for 10 h until **2a** was consumed completely (monitored by TLC). After completion, the mixture was filtered and the filtrate was concentrated under reduced pressure. The crude product was purified by flash column chromatography (1/4, ethyl acetate/petroleum ether) to afford 6-methyl-4-(trichloromethyl)-1,3,4,14b-tetrahydro pyrido[2',1':3,4]pyrazino[2,1-b]quinazolin-9(2H)-one **5a**.

**6-methyl-4-(trichloromethyl)-1,3,4,14b-tetrahydropyrido[2',1':3,4]pyrazino[2,1-b]quinazolin-9(2H)-one(5a).** A yellow solid, 0.031 g, 40% yield; Mp: 128–129 °C; <sup>1</sup>H NMR (500 MHz, CDCl<sub>3</sub>) δ 8.32 (d, *J* = 8.0 Hz, 1H), 7.70–7.67 (m, 2H), 7.45–7.42 (m, 1H), 6.96 (s, 1H), 4.48–4.45 (m, 1H), 3.91–3.87 (m, 1H), 2.62–2.55 (m, 1H), 2.52–2.47 (m, 1H), 2.36 (t, *J* = 5.0 Hz, 1H), 2.16 (s, 3H), 2.07–1.98 (m, 2H), 1.62–1.52 (m, 1H); <sup>13</sup>C NMR (125 MHz, CDCl<sub>3</sub>) δ 157.7, 148.7, 147.7, 136.7, 133.5, 127.5, 127.0, 126.3, 120.4, 106.8, 104.2, 65.5, 58.3, 25.9, 21.8, 18.3, 16.2; HRMS (ESI) *m/z* calcd for C<sub>17</sub>H<sub>17</sub>Cl<sub>3</sub>N<sub>3</sub>O [M + H]<sup>+</sup>: 384.0432, found 384.0423.

## 5. Synthesis of compounds 6 and 7

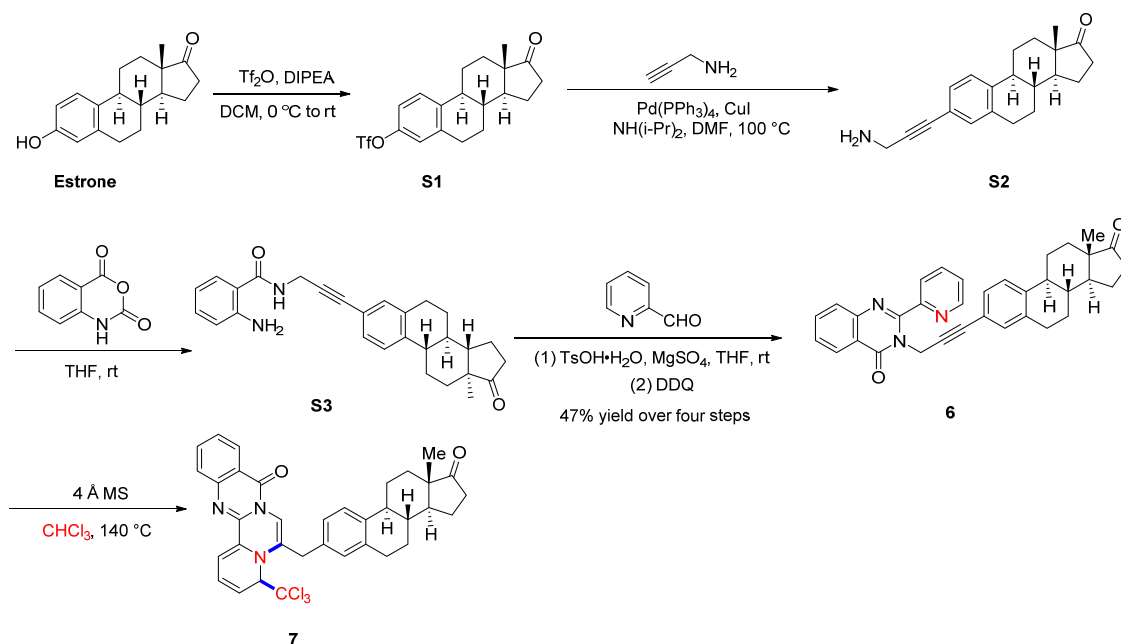

**Procedure:** estrone (1.0 equiv.) and DIPEA (1.1 equiv.) was sequentially dissolved in dry DCM. The resulting mixture was stirred at 25 °C for 0.5 h, following by dropwise addition of Tf<sub>2</sub>O (1.1 equiv.) at 0 °C. After that, the mixture was warmed to room temperature, and stirred overnight. When the reaction was completed, 10% HCl was added to the solution to quench the reaction, and then the mixture was extracted with DCM. The organic layer was washed with saturated NaHCO<sub>3</sub> and saturated brine, dried over anhydrous Na<sub>2</sub>SO<sub>4</sub>, filtered and concentrated in vacuo. The crude product was purified by flash column chromatography (1/10, ethyl acetate/petroleum ether) to afford compound **S1**.

A mixture of **S1** (1.0 equiv.), prop-2-yn-1-amine (1.5 equiv.), diisopropylamine (3.0 equiv.), and Pd(PPh<sub>3</sub>)<sub>4</sub> (0.1 equiv.), CuI (0.1 equiv.) was dissolved in DMF and stirred at 100 °C for 8 h under nitrogen. The reaction mixture was diluted with water and extracted with EtOAc, the combined organic layers were washed with brine for three time, dried by Na<sub>2</sub>SO<sub>4</sub>, filtered and concentrated in vacuo. The crude product was purified by flash column chromatography (1/10, methanol/dichloromethane) to afford compound **S2**.

A mixture of isatoic anhydride (1.0 equiv.) and **S2** (1.5 equiv.) was dissolved in THF and stirred at room temperature for 12 h until isatoic anhydride was consumed

completely (monitored by TLC). At this time, the solvent was removed under reduced pressure and the crude product was purified by flash column chromatography (1/20, ethyl acetate/dichloromethane) to afford compound **S3**.

A mixture of **S3** (1.0 equiv.), 2-pyridinecarboxaldehyde (1.0 equiv.), MgSO<sub>4</sub> (3.0 equiv.) and TsOH·H<sub>2</sub>O (0.3 equiv.) was dissolved in THF and stirred at room temperature for 4 h under nitrogen until **S3** was consumed completely (monitored by TLC). Then DDQ (1.2 equiv.) was added. The resulting reaction mixture was stirred at room temperature for an additional 15 min (monitored by TLC). At this time, the solvent was removed under reduced pressure and the crude product was purified by flash column chromatography (1/2, ethyl acetate/ petroleum ether) to afford compound **6** with 47% yield.

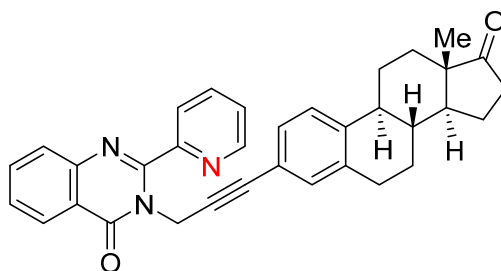

**6**

**3-(3-((8R,9S,13S,14S)-13-methyl-17-oxo-7,8,9,11,12,13,14,15,16,17-decahydro-6H-cyclopenta[a]phenanthren-3-yl)prop-2-yn-1-yl)-2-(pyridin-2-yl)quinazolin-4(3H)-one (6)**. A yellow solid, 0.27 g, 47% yield; Mp: 131-132 °C; <sup>1</sup>H NMR (500 MHz, CDCl<sub>3</sub>) δ 8.74 (d, *J* = 4.0 Hz, 1H), 8.38 (d, *J* = 7.5 Hz, 1H), 7.94-7.89 (m, 2H), 7.79-7.75 (m, 2H), 7.55-7.52 (m, 1H), 7.48-7.45 (m, 1H), 7.13 (d, *J* = 8.5 Hz, 1H), 6.92 (d, *J* = 7.0 Hz, 2H), 5.53 (s, 2H), 2.80-2.78 (m, 2H), 2.51-2.45 (m, 1H), 2.35-2.33 (m, 1H), 2.24-2.22 (m, 1H), 2.16-2.08 (m, 1H), 2.02-1.92 (m, 2H), 1.63-1.48 (m, 3H), 1.46-1.33 (m, 2H), 1.26 (t, *J* = 7.0 Hz, 2H), 0.87 (s, 3H); <sup>13</sup>C NMR (125 MHz, CDCl<sub>3</sub>) δ 220.6, 161.5, 153.6, 152.8, 148.7, 146.9, 140.4, 137.2, 136.4, 134.5, 132.2, 128.9, 127.6, 127.5, 127.2, 125.1, 124.9, 124.6, 121.0, 119.4, 83.4, 83.1, 50.4, 47.8, 44.3, 37.8, 35.7, 34.2, 31.4, 28.9, 26.2, 25.4, 21.5, 13.7; HRMS (ESI) *m/z* calcd for C<sub>34</sub>H<sub>31</sub>N<sub>3</sub>NaO<sub>2</sub> [M + H]<sup>+</sup>: 536.2308, found 536.2303.

A 25 mL reaction flask was charged with **6** (0.2 mmol) and 4Å MS (500 mg). CHCl<sub>3</sub>

(2 mL) was then added via syringe and the reaction vessel was sealed with a Teflon cap. The reaction mixture was stirred vigorously at 140 °C in an oil bath for 48 h until **6** was consumed completely (monitored by TLC). At this time, the solvent was removed under reduced pressure and the crude product was purified by flash column chromatography (1/10 to 1/6, ethyl acetate/petroleum ether) to afford compound **7** with 30% yield (0.038 g).

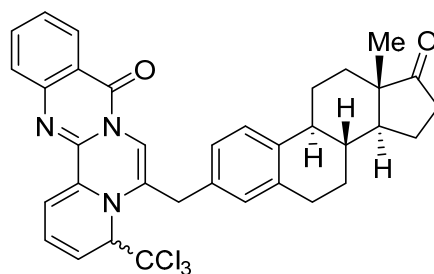

**7** (*dr* = 2.8:1)

**(R)-6-(((8R,9S,13S,14S)-13-methyl-17-oxo-7,8,9,11,12,13,14,15,16,17-decahydro-6H-cyclopenta[a]phenanthren-3-yl)methyl)-4-(trichloromethyl)pyrido[2',1':3,4]pyrazino[2,1-b]quinazolin-9(4H)-one (7)**. A yellow solid, 0.038 g, 30% yield; Mp: 282–283 °C; *Major isomer*: <sup>1</sup>H NMR (600 MHz, CDCl<sub>3</sub>) δ 8.31-8.29 (m, 1H), 7.79-7.73 (m, 2H), 7.49-7.45 (m, 1H), 7.25-7.20 (m, 2H), 7.04-6.98 (m, 2H), 6.96-6.93 (m, 1H), 6.64-6.58 (m, 1H), 5.64-5.60 (m, 1H), 5.13-5.11 (m, 1H), 4.04 (d, *J* = 20.4 Hz, 1H), 3.88 (d, *J* = 20.4 Hz, 1H), 2.88-2.83 (m, 2H), 2.54-2.39 (m, 4H), 2.18-2.13 (m, 1H), 2.09-2.02 (m, 3H), 1.67-1.61 (m, 2H), 1.55-1.50 (m, 3H), 0.92 (s, 3H); <sup>13</sup>C NMR (150 MHz, CDCl<sub>3</sub>) δ 220.9, 157.5, 147.1, 144.4, 138.9, 137.2, 134.7, 132.4, 131.0, 129.6, 128.4, 127.9, 127.5, 127.1, 127.0, 126.0, 125.6, 125.3, 119.9, 114.6, 104.2, 103.7, 101.0, 99.9, 66.7, 50.5, 48.0, 38.0, 35.8, 35.1, 31.5, 26.4, 25.7, 21.6, 13.8; *Minor isomer*: <sup>1</sup>H NMR (600 MHz, CDCl<sub>3</sub>) δ 8.28-8.27 (m, 1H), 7.74-7.63 (m, 2H), 7.49-7.45 (m, 1H), 7.25-7.20 (m, 2H), 7.15-7.08 (m, 2H), 6.93-6.90 (m, 1H), 6.70-6.68 (m, 1H), 5.61-5.56 (m, 1H), 5.08-5.06 (m, 1H), 3.82 (d, *J* = 19.8 Hz, 1H), 3.74 (d, *J* = 19.8 Hz, 1H), 2.88-2.83 (m, 2H), 2.31-2.29 (m, 4H), 2.13-2.11 (m, 1H), 2.01-1.99 (m, 3H), 1.60-1.59 (m, 2H), 1.48-1.47 (m, 3H), 0.91 (s, 3H); <sup>13</sup>C NMR (150 MHz, CDCl<sub>3</sub>) δ 220.8, 157.5, 147.1, 144.4, 138.9, 137.1, 132.7, 132.1, 131.0, 128.6, 128.4, 127.8, 127.7, 127.5, 127.1, 126.0, 125.5, 125.3, 119.9, 114.6, 104.2, 103.7, 100.8, 99.9, 66.7, 50.5, 48.0, 38.0, 35.7,

35.1, 31.5, 26.4, 25.7, 21.6, 13.8; HRMS (ESI)  $m/z$  calcd for  $C_{35}H_{33}Cl_3N_3O_2$   $[M + H]^+$ : 632.1633, found 632.1606.

## 6. Mechanistic studies

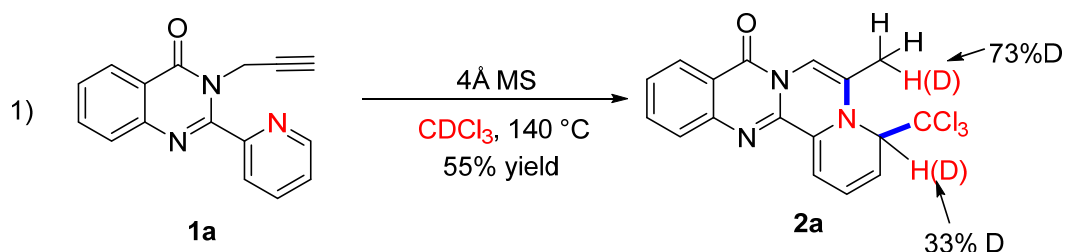

In a 25 mL reaction flask was charged with **1a** (0.20 mmol) and 4 Å MS (500 mg).  $CDCl_3$  (2 mL) was then added via syringe and the reaction vessel was sealed with a Teflon cap. The reaction mixture was stirred vigorously at 140 °C in an oil bath for 16 h until **1a** was consumed completely (monitored by TLC). At this time, the solvent was removed under reduced pressure and the crude product was purified by flash column chromatography (1/6, ethyl acetate/petroleum ether) to afford compound **D-2a**.

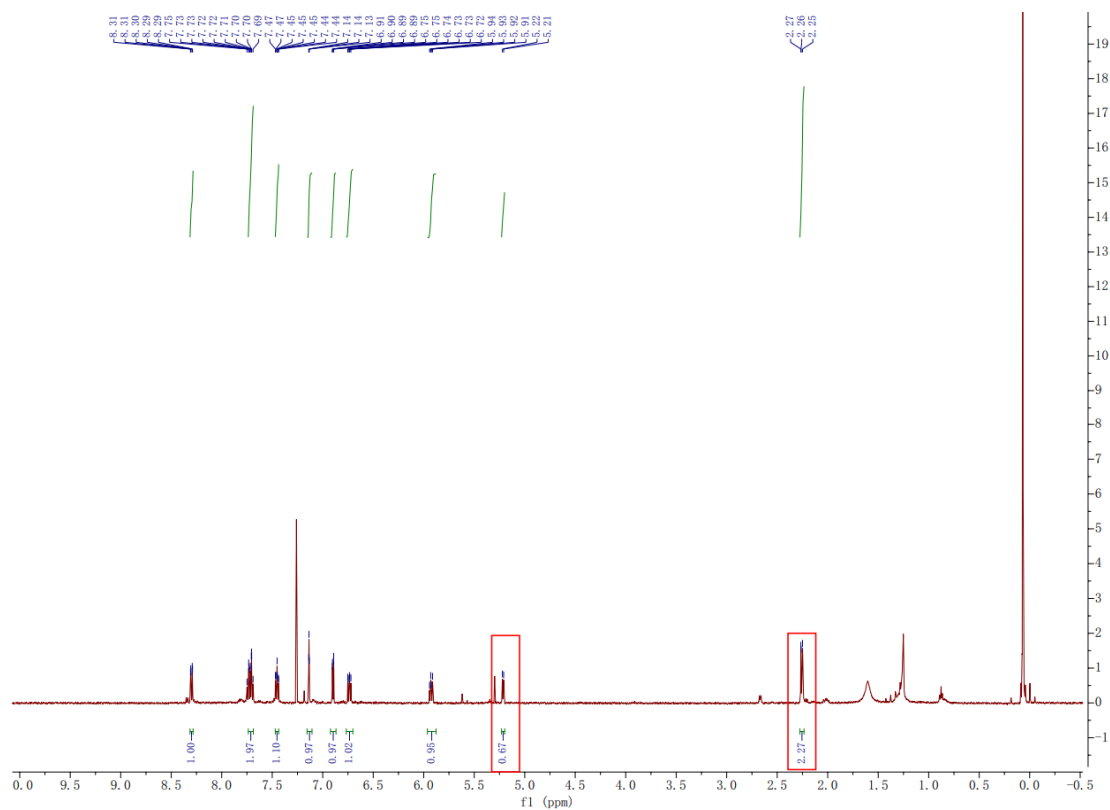

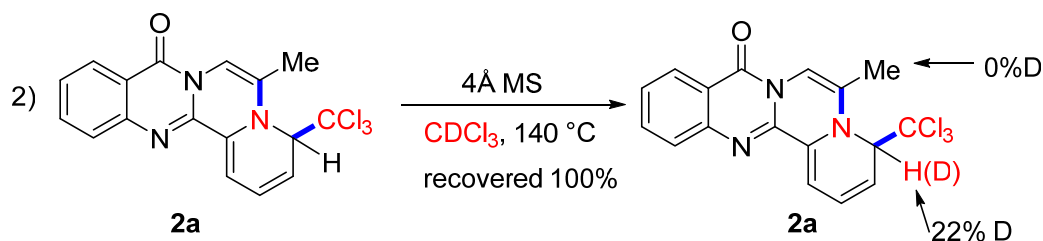

In a 25 mL reaction flask was charged with **2a** (0.20 mmol) and 4Å MS (500 mg). CDCl<sub>3</sub> (2 mL) was then added via syringe and the reaction vessel was sealed with a Teflon cap. The reaction mixture was stirred vigorously at 140 °C in an oil bath for 16 h and monitored by <sup>1</sup>H NMR.

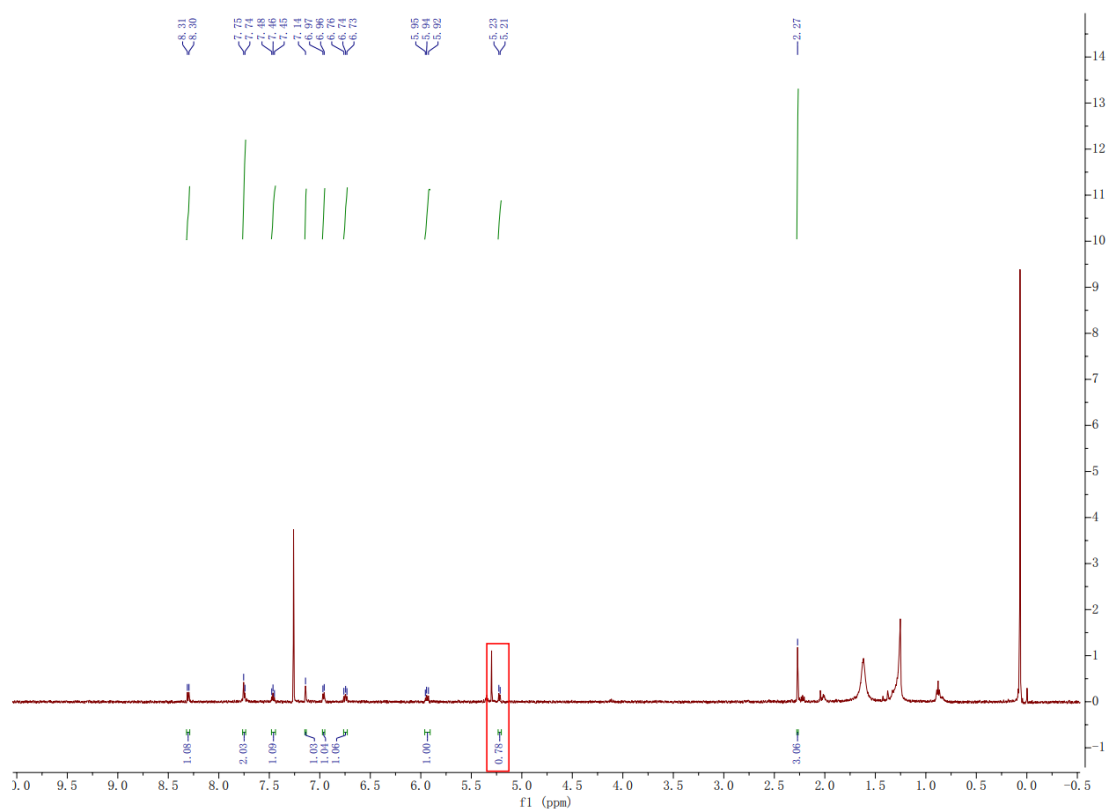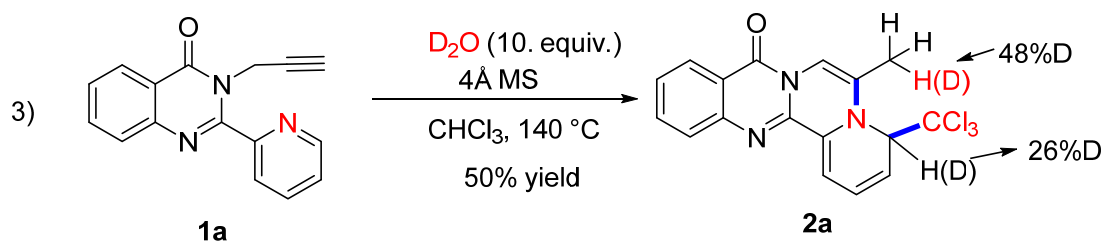

In a 25 mL reaction flask was charged with **1a** (0.20 mmol) and 4Å MS (500 mg) under. D<sub>2</sub>O (0.036 mL, 10 equiv.) and CHCl<sub>3</sub> (2 mL) was then added via syringe and the reaction vessel was sealed with a Teflon cap. The reaction mixture was stirred vigorously at 140 °C in an oil bath for 16 h until **1a** was consumed completely

(monitored by TLC). At this time, the solvent was removed under reduced pressure and the crude product was purified by flash column chromatography (1/6, ethyl acetate/petroleum ether) to afford compound **D-2a**.

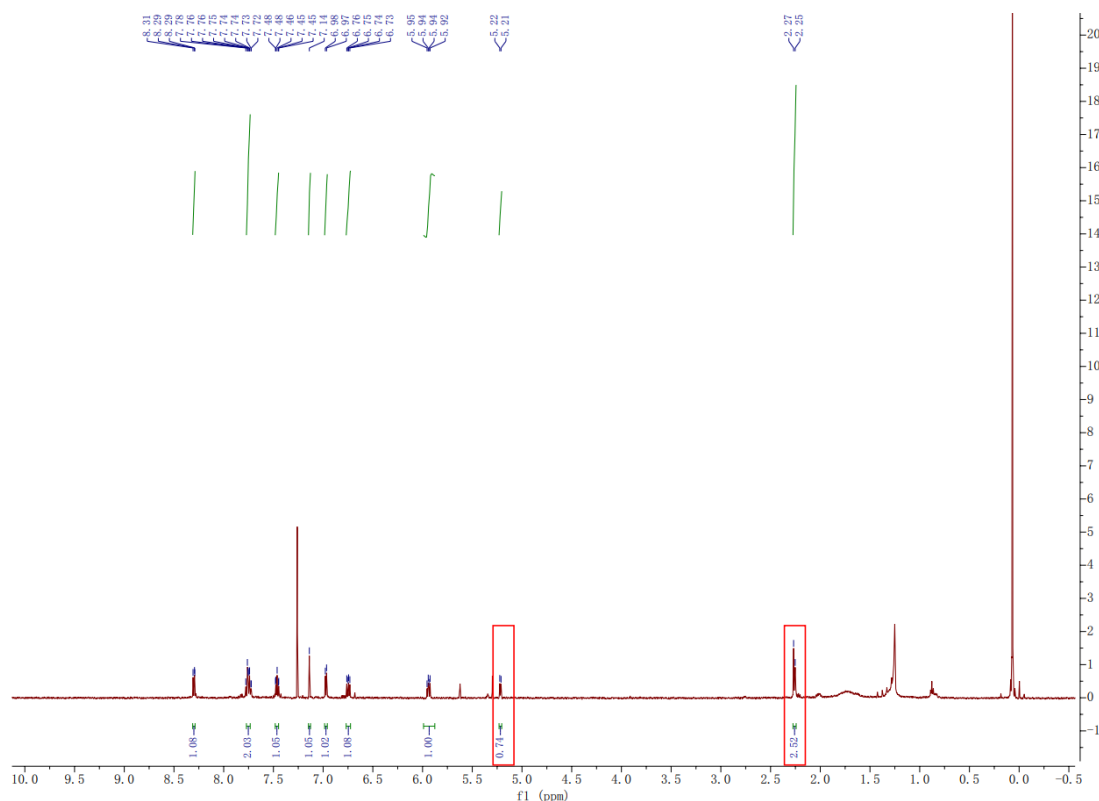

## 7. Synthesis of compounds **1**

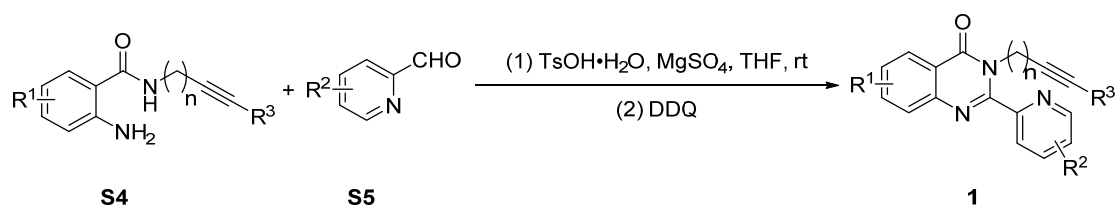

Alkynyl anilines derivatives **S4** was prepared according to literature method.<sup>[1]</sup> pyridine aldehyde **S5** was purchased from Energy.

To a stirred mixture of N-alkynyl anilines **S4** (1 mmol, 1.0 equiv.), pyridine aldehyde **S5** (1 mmol, 1.0 equiv.) and anhydrous magnesium sulfate (0.36 g, 3.0 equiv.) in THF (5 mL, 0.2 M) was added p-toluene sulfonic acid (0.057 g, 0.3 equiv.) at 25 °C under nitrogen. The resulting mixture was stirred at 25 °C for 4-12 h. After completion indicated by TLC, 2,3-dicyano-5,6-dichlorobenzoquinone (DDQ, 0.272 g, 1.2 equiv.) was added. The resulting reaction mixture was stirred at room temperature for an

additional 15 min (monitored by TLC). The reaction was concentrated under reduced pressure. The crude product was purified by flash column chromatography (1/6 to 1/1, ethyl acetate/petroleum ether) to afford **1a-1z** and **6**.

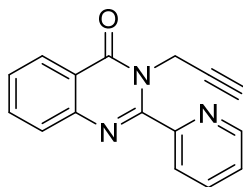

**1a**

**3-(prop-2-yn-1-yl)-2-(pyridin-2-yl)quinazolin-4(3H)-one (1a).** Purification by flash column chromatography (2/1, ethyl acetate/petroleum ether) to afford **1a**. A off-white solid, 0.188 g, 72% yield; Mp: 158-159 °C; <sup>1</sup>H NMR (400 MHz, DMSO-*d*<sub>6</sub>) δ 8.74 (d, *J* = 4.4 Hz, 1H), 8.24 (d, *J* = 8.0 Hz, 1H), 8.10-8.06 (m, 1H), 7.95 (d, *J* = 8.0 Hz, 1H), 7.91 (d, *J* = 7.6 Hz, 1H), 7.77 (d, *J* = 8.0 Hz, 1H), 7.66-7.62 (m, 2H), 5.11 (d, *J* = 2.0 Hz, 2H), 3.09 (s, 1H); <sup>13</sup>C NMR (125 MHz, DMSO-*d*<sub>6</sub>) δ 160.6, 152.6, 152.5, 148.5, 146.5, 137.8, 135.1, 128.0, 127.6, 126.5, 125.3, 125.1, 120.3, 78.7, 74.4, 33.7; HRMS (ESI) *m/z* calcd for C<sub>16</sub>H<sub>12</sub>N<sub>3</sub>O [M + H]<sup>+</sup>: 262.0975, found 262.0996.

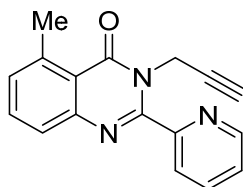

**1b**

**5-methyl-3-(prop-2-yn-1-yl)-2-(pyridin-2-yl)quinazolin-4(3H)-one (1b).** Purification by flash column chromatography (2/1, ethyl acetate/petroleum ether) to afford **1b**. A white solid, 0.132 g, 48% yield; Mp: 182-183 °C; <sup>1</sup>H NMR (400 MHz, CDCl<sub>3</sub>) δ 8.72 (d, *J* = 4.4 Hz, 1H), 7.94-7.89 (m, 2H), 7.63-7.57 (m, 2H), 7.47-7.44 (m, 1H), 7.29 (d, *J* = 6.0 Hz, 1H), 5.11 (d, *J* = 2.0 Hz, 2H), 2.93 (s, 3H), 2.04 (s, 1H); <sup>13</sup>C NMR (100 MHz, CDCl<sub>3</sub>) δ 161.9, 153.3, 152.3, 148.7, 148.4, 141.5, 137.4, 133.7, 130.2, 125.9, 124.9, 124.7, 119.5, 78.6, 71.3, 33.6, 23.1; HRMS (ESI) *m/z* calcd for C<sub>17</sub>H<sub>14</sub>N<sub>3</sub>O [M + H]<sup>+</sup>: 276.1131, found 276.1146.



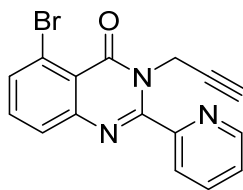

**1c**

**5-bromo-3-(prop-2-yn-1-yl)-2-(pyridin-2-yl)quinazolin-4(3H)-one (1c).**

Purification by flash column chromatography (2/1, ethyl acetate/petroleum ether) to afford **1c**. A white solid, 0.081 g, 24% yield; Mp: 190–191 °C; <sup>1</sup>H NMR (400 MHz, CDCl<sub>3</sub>) δ 8.72 (d, *J* = 4.4 Hz, 1H), 7.94-7.91 (m, 2H), 7.78 (d, *J* = 8.0 Hz, 1H), 7.71 (d, *J* = 8.0 Hz, 1H), 7.55 (d, *J* = 8.4 Hz, 1H), 7.51-7.47 (m, 1H), 5.27 (d, *J* = 1.6 Hz, 2H), 2.05 (s, 1H); <sup>13</sup>C NMR (100 MHz, CDCl<sub>3</sub>) δ 159.5, 152.8, 152.7, 149.1, 148.6, 137.4, 134.2, 134.0, 127.7, 124.9, 121.7, 119.0, 78.1, 71.7, 33.9; HRMS (ESI) *m/z* calcd for C<sub>16</sub>H<sub>11</sub>BrN<sub>3</sub>O [M + H]<sup>+</sup>: 340.0080, found 340.0099.

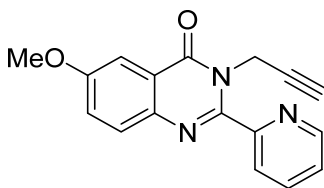

**1d**

**6-methoxy-3-(prop-2-yn-1-yl)-2-(pyridin-2-yl)quinazolin-4(3H)-one (1d).**

Purification by flash column chromatography (2/1, ethyl acetate/petroleum ether) to afford **1d**. A pale yellow solid, 0.131 g, 45% yield; Mp: 190-191 °C; <sup>1</sup>H NMR (400 MHz, CDCl<sub>3</sub>) δ 8.72 (d, *J* = 4.4 Hz, 1H), 7.95-7.90 (m, 2H), 7.73-7.68 (m, 2H), 7.47-7.44 (m, 1H), 7.39-7.36 (m, 1H), 5.32 (d, *J* = 2.4 Hz, 2H), 3.95 (s, 3H), 2.03 (s, 1H); <sup>13</sup>C NMR (125 MHz, CDCl<sub>3</sub>) δ 161.5, 159.0, 153.4, 150.3, 148.6, 141.6, 137.4, 129.3, 125.0, 124.9, 124.6, 121.8, 106.5, 78.4, 71.6, 55.9, 33.9; HRMS (ESI) *m/z* calcd for C<sub>17</sub>H<sub>14</sub>N<sub>3</sub>O<sub>2</sub> [M + H]<sup>+</sup>: 292.1081, found 292.1108.

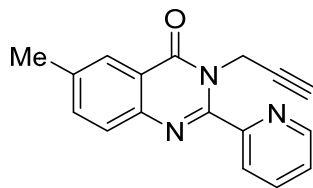

**1e**

**6-methyl-3-(prop-2-yn-1-yl)-2-(pyridin-2-yl)quinazolin-4(3H)-one (1e).**

Purification by flash column chromatography (2/1, ethyl acetate/petroleum ether) to afford **1e**. A off-white solid, 0.212 g, 77% yield; Mp: 166-167 °C; <sup>1</sup>H NMR (400 MHz, CDCl<sub>3</sub>) δ 8.72 (d, *J* = 4.4 Hz, 1H), 8.15 (s, 1H), 7.95-7.90 (m, 2H), 7.67 (d, *J* = 8.0 Hz, 1H), 7.61 (d, *J* = 8.4 Hz, 1H), 7.47-7.44 (m, 1H), 5.29 (d, *J* = 2.0 Hz, 2H), 2.52 (s, 3H), 2.02 (s, 1H); <sup>13</sup>C NMR (125 MHz, CDCl<sub>3</sub>) δ 161.6, 153.4, 151.7, 148.6, 144.9, 138.0, 137.4, 136.1, 127.5, 126.6, 125.0, 124.7, 120.7, 78.4, 71.5, 33.8, 21.4; HRMS (ESI) *m/z* calcd for C<sub>17</sub>H<sub>14</sub>N<sub>3</sub>O [M + H]<sup>+</sup>: 276.1131, found 276.1154.

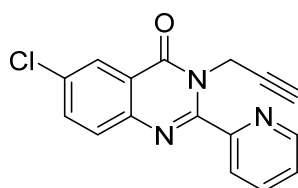

**1f**

**6-chloro-3-(prop-2-yn-1-yl)-2-(pyridin-2-yl)quinazolin-4(3H)-one (1f)**. Purification by flash column chromatography (2/1, ethyl acetate/petroleum ether) to afford **1f**. A off-white solid, 0.233 g, 79% yield; Mp: 167-168 °C; <sup>1</sup>H NMR (400 MHz, CDCl<sub>3</sub>) δ 8.72 (d, *J* = 4.4 Hz, 1H), 8.31 (s, 1H), 7.94 (d, *J* = 4.4 Hz, 2H), 7.70 (s, 2H), 7.49-7.46 (m, 1H), 5.30 (d, *J* = 2.4 Hz, 2H), 2.03 (s, 1H); <sup>13</sup>C NMR (100 MHz, CDCl<sub>3</sub>) δ 160.6, 153.0, 152.6, 148.7, 145.4, 137.5, 135.0, 133.4, 129.4, 126.5, 125.1, 124.9, 121.9, 78.0, 71.9, 34.0; HRMS (ESI) *m/z* calcd for C<sub>16</sub>H<sub>11</sub>ClN<sub>3</sub>O [M + H]<sup>+</sup>: 296.0585, found 296.0602.

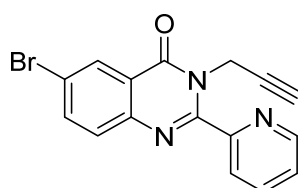

**1g**

**6-bromo-3-(prop-2-yn-1-yl)-2-(pyridin-2-yl)quinazolin-4(3H)-one (1g)**. Purification by flash column chromatography (2/1, ethyl acetate/petroleum ether) to afford **1g**. A white solid, 0.159 g, 47% yield; Mp: 165-166 °C; <sup>1</sup>H NMR (400 MHz, CDCl<sub>3</sub>) δ 8.72 (d, *J* = 4.8 Hz, 1H), 8.49 (s, 1H), 7.94 (d, *J* = 4.8 Hz, 2H), 7.87 (dd, *J* = 8.8, 2.0 Hz, 1H), 7.64 (d, *J* = 8.4 Hz, 1H), 7.49-7.48 (m, 1H), 5.30 (d, *J* = 2.4 Hz, 2H), 2.03 (s, 1H); <sup>13</sup>C NMR (100 MHz, CDCl<sub>3</sub>) δ 160.4, 153.0, 152.8, 148.7, 145.8, 137.8,

137.5, 129.7, 129.5, 125.1, 124.9, 122.3, 121.2, 78.0, 71.9, 34.0; HRMS (ESI)  $m/z$  calcd for  $C_{16}H_{11}BrN_3O$   $[M + H]^+$ : 340.0080, found 340.0096.

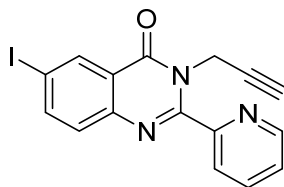

**1h**

**6-iodo-3-(prop-2-yn-1-yl)-2-(pyridin-2-yl)quinazolin-4(3H)-one (1h).** Purification by flash column chromatography (2/1, ethyl acetate/petroleum ether) to afford **1h**. A grey solid, 0.205 g, 53% yield; Mp: 166-167 °C;  $^1H$  NMR (400 MHz,  $CDCl_3$ )  $\delta$  8.73-8.70 (m, 2H), 8.06-8.04 (m, 1H), 7.94 (d,  $J = 5.6$  Hz, 2H), 7.50-7.46 (m, 2H), 5.31 (d,  $J = 2.4$  Hz, 2H), 2.03 (s, 1H);  $^{13}C$  NMR (125 MHz,  $CDCl_3$ )  $\delta$  160.2, 153.0, 152.9, 148.7, 146.3, 143.4, 137.4, 136.0, 129.5, 125.1, 124.9, 122.5, 92.2, 78.1, 71.8, 34.0; HRMS (ESI)  $m/z$  calcd for  $C_{16}H_{11}IN_3O$   $[M + H]^+$ : 387.9941, found 387.9976.

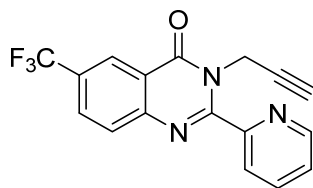

**1i**

**3-(prop-2-yn-1-yl)-2-(pyridin-2-yl)-6-(trifluoromethyl)quinazolin-4(3H)-one (1i).** Purification by flash column chromatography (2/1, ethyl acetate/petroleum ether) to afford **1i**. A yellow solid, 0.171 g, 52% yield; Mp: 125-126 °C;  $^1H$  NMR (400 MHz,  $CDCl_3$ )  $\delta$  8.73 (d,  $J = 4.4$  Hz, 1H), 8.64 (s, 1H), 7.98-7.92 (m, 3H), 7.86 (d,  $J = 8.8$  Hz, 1H), 7.50-7.48 (m, 1H), 5.33 (d,  $J = 1.6$  Hz, 2H), 2.04 (s, 1H);  $^{13}C$  NMR (100 MHz,  $CDCl_3$ )  $\delta$  160.9, 154.3, 152.8, 149.0, 148.7, 137.5, 130.8 (q,  $J = 3.0$  Hz), 129.9 (q,  $J = 33.6$  Hz), 128.7, 127.6 (q,  $J = 270.5$  Hz), 125.2 (q,  $J = 2.9$  Hz), 125.1, 120.8, 77.8, 72.0, 34.0;  $^{19}F$  NMR (376 MHz,  $CDCl_3$ )  $\delta$  -62.4; HRMS (ESI)  $m/z$  calcd for  $C_{17}H_{11}F_3N_3O$   $[M + H]^+$ : 330.0849, found 330.0872.

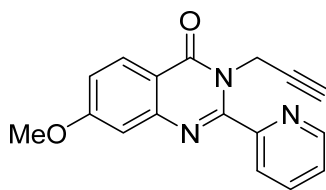

**1j**

**7-methoxy-3-(prop-2-yn-1-yl)-2-(pyridin-2-yl)quinazolin-4(3H)-one (1j).**

Purification by flash column chromatography (2/1, ethyl acetate/petroleum ether) to afford **1j**. A grey solid, 0.099 g, 34% yield; Mp: 138-139 °C; <sup>1</sup>H NMR (400 MHz, CDCl<sub>3</sub>) δ 8.72 (d, *J* = 4.8 Hz, 1H), 8.26 (d, *J* = 8.8 Hz, 1H), 7.92 (d, *J* = 4.0 Hz, 2H), 7.46 (d, *J* = 4.4 Hz, 1H), 7.14 (d, *J* = 2.0 Hz, 2H), 5.25 (d, *J* = 2.0 Hz, 2H), 3.90 (s, 3H), 2.02 (s, 1H); <sup>13</sup>C NMR (100 MHz, CDCl<sub>3</sub>) δ 164.7, 161.0, 153.3, 153.2, 149.1, 148.7, 137.4, 128.7, 124.9, 124.7, 117.7, 114.4, 108.3, 78.4, 71.5, 55.7, 33.6; HRMS (ESI) *m/z* calcd for C<sub>17</sub>H<sub>14</sub>N<sub>3</sub>O<sub>2</sub> [M + H]<sup>+</sup>: 292.1081, found 292.1102.

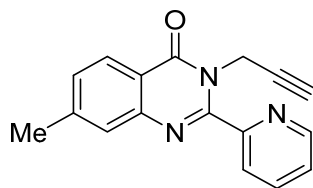

**1k**

**7-methyl-3-(prop-2-yn-1-yl)-2-(pyridin-2-yl)quinazolin-4(3H)-one (1k).**

Purification by flash column chromatography (2/1, ethyl acetate/petroleum ether) to afford **1k**. A off-white solid, 0.094 g, 34% yield; Mp: 155-156 °C; <sup>1</sup>H NMR (400 MHz, CDCl<sub>3</sub>) δ 8.72 (d, *J* = 4.8 Hz, 1H), 8.25 (d, *J* = 8.0 Hz, 1H), 7.93-7.89 (m, 2H), 7.55 (s, 1H), 7.47-7.44 (m, 1H), 7.36 (d, *J* = 8.0 Hz, 1H), 5.28 (d, *J* = 2.4 Hz, 2H), 2.51 (s, 3H), 2.02 (s, 1H); <sup>13</sup>C NMR (100 MHz, CDCl<sub>3</sub>) δ 161.5, 153.4, 152.5, 148.6, 147.0, 145.7, 137.4, 129.2, 127.4, 127.0, 125.0, 124.7, 118.5, 78.5, 71.5, 33.7, 21.9; HRMS (ESI) *m/z* calcd for C<sub>17</sub>H<sub>14</sub>N<sub>3</sub>O [M + H]<sup>+</sup>: 276.1131, found 276.1156.

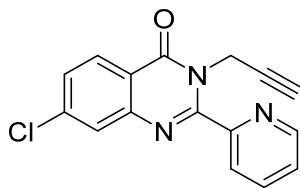

**1l**

**7-chloro-3-(prop-2-yn-1-yl)-2-(pyridin-2-yl)quinazolin-4(3H)-one (1l).** Purification

by flash column chromatography (2/1, ethyl acetate/petroleum ether) to afford **1l**. A off-white solid, 0.068 g, 23% yield; Mp: 180-181 °C; <sup>1</sup>H NMR (400 MHz, CDCl<sub>3</sub>) δ 8.72 (d, *J* = 4.4 Hz, 1H), 8.30 (d, *J* = 8.8 Hz, 1H), 7.94 (d, *J* = 4.0 Hz, 2H), 7.75 (s, 1H), 7.50-7.47 (m, 2H), 5.30 (d, *J* = 2.0 Hz, 2H), 2.03 (s, 1H); <sup>13</sup>C NMR (100 MHz, CDCl<sub>3</sub>) δ 161.0, 153.6, 153.0, 148.7, 147.9, 140.8, 137.5, 128.6, 128.2, 127.3, 125.1, 125.0, 119.4, 78.1, 71.8, 33.9; HRMS (ESI) *m/z* calcd for C<sub>16</sub>H<sub>11</sub>ClN<sub>3</sub>O [M + H]<sup>+</sup>: 296.0585, found 296.0599.

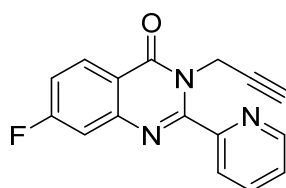

**1m**

**7-fluoro-3-(prop-2-yn-1-yl)-2-(pyridin-2-yl)quinazolin-4(3H)-one (1m).**

Purification by flash column chromatography (2/1, ethyl acetate/petroleum ether) to afford **1m**. A off-white solid, 0.084 g, 30% yield; Mp: 177-178 °C; <sup>1</sup>H NMR (400 MHz, CDCl<sub>3</sub>) δ 8.73 (d, *J* = 4.8 Hz, 1H), 8.40 (dd, *J* = 8.8, 6.0 Hz, 1H), 7.95-7.92 (m, 2H), 7.50-7.47 (m, 1H), 7.42 (dd, *J* = 9.6, 2.0 Hz, 1H), 7.28-7.23 (m, 1H), 5.30 (d, *J* = 2.4 Hz, 2H), 2.04 (s, 1H); <sup>13</sup>C NMR (100 MHz, CDCl<sub>3</sub>) δ 167.9, 165.3, 160.8, 153.7, 153.0, 149.1 (d, *J* = 13.2 Hz), 148.7, 137.5, 130.0 (d, *J* = 10.2 Hz), 125.1 (d, *J* = 10.2 Hz), 117.7, 116.5 (d, *J* = 24.1 Hz), 113.0 (d, *J* = 21.9 Hz), 78.1, 71.8, 33.8; <sup>19</sup>F NMR (376 MHz, CDCl<sub>3</sub>) δ -102.7; HRMS (ESI) *m/z* calcd for C<sub>16</sub>H<sub>11</sub>FN<sub>3</sub>O [M + H]<sup>+</sup>: 280.0881, found 280.0904.

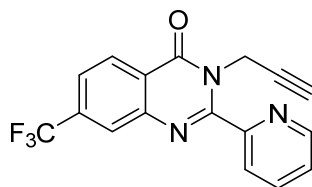

**1n**

**3-(prop-2-yn-1-yl)-2-(pyridin-2-yl)-7-(trifluoromethyl)quinazolin-4(3H)-one (1n).**

Purification by flash column chromatography (2/1, ethyl acetate/petroleum ether) to afford **1n**. A white solid, 0.138 g, 42% yield; Mp: 138-139 °C; <sup>1</sup>H NMR (400 MHz, CDCl<sub>3</sub>) δ 8.73 (d, *J* = 4.8 Hz, 1H), 8.49 (d, *J* = 8.0 Hz, 1H), 8.05 (s, 1H), 7.98-7.93 (m,

2H), 7.75 (d,  $J = 8.4$  Hz, 1H), 7.51-7.48 (m, 1H), 5.35 (d,  $J = 2.4$  Hz, 2H), 2.04 (s, 1H);  $^{13}\text{C}$  NMR (100 MHz,  $\text{CDCl}_3$ )  $\delta$  160.8, 153.7, 152.8, 148.7, 146.9, 137.5, 136.7 (q,  $J = 32.1$  Hz), 128.3, 125.4 (q,  $J = 3.6$  Hz), 125.2, 125.1, 124.7 (q,  $J = 272.0$  Hz), 123.6 (q,  $J = 2.9$  Hz), 123.2, 77.9, 72.0, 34.0;  $^{19}\text{F}$  NMR (376 MHz,  $\text{CDCl}_3$ )  $\delta$  -63.3; HRMS (ESI)  $m/z$  calcd for  $\text{C}_{17}\text{H}_{11}\text{F}_3\text{N}_3\text{O}$   $[\text{M} + \text{H}]^+$ : 330.0849, found 330.0869.

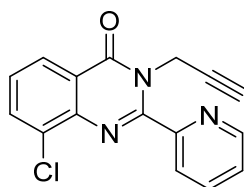

**1o**

**7-chloro-3-(prop-2-yn-1-yl)-2-(pyridin-2-yl)quinazolin-4(3H)-one (1o).**

Purification by flash column chromatography (2/1, ethyl acetate/petroleum ether) to afford **1o**. A off-white solid, 0.089 g, 30% yield; Mp: 229-230 °C;  $^1\text{H}$  NMR (400 MHz,  $\text{CDCl}_3$ )  $\delta$  8.71 (d,  $J = 4.4$  Hz, 1H), 8.29 (d,  $J = 8.0$  Hz, 1H), 8.11 (d,  $J = 7.6$  Hz, 1H), 7.96-7.72 (m, 1H), 7.87 (d,  $J = 7.6$  Hz, 1H), 7.49-7.43 (m, 2H), 5.43 (d,  $J = 2.0$  Hz, 2H), 2.03 (s, 1H);  $^{13}\text{C}$  NMR (100 MHz,  $\text{CDCl}_3$ )  $\delta$  161.2, 153.1, 152.7, 148.3, 143.7, 137.5, 134.9, 132.2, 127.6, 126.0, 125.8, 125.0, 122.5, 78.2, 71.7, 34.0; HRMS (ESI)  $m/z$  calcd for  $\text{C}_{16}\text{H}_{11}\text{ClN}_3\text{O}$   $[\text{M} + \text{H}]^+$ : 296.0585, found 296.0610.

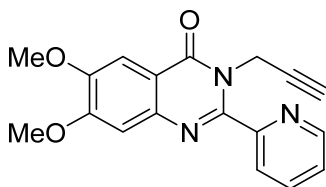

**1p**

**6,7-dimethoxy-3-(prop-2-yn-1-yl)-2-(pyridin-2-yl)quinazolin-4(3H)-one (1p).**

Purification by flash column chromatography (2/1, ethyl acetate/petroleum ether) to afford **1p**. A off-white solid, 0.080 g, 25% yield; Mp: 216-217 °C;  $^1\text{H}$  NMR (400 MHz,  $\text{CDCl}_3$ )  $\delta$  8.72 (d,  $J = 3.2$  Hz, 1H), 7.92 (s, 2H), 7.68 (s, 1H), 7.47-7.45 (m, 1H), 7.17 (s, 1H), 5.29 (s, 2H), 4.02 (s, 3H), 3.99 (s, 3H), 2.03 (s, 1H);  $^{13}\text{C}$  NMR (100 MHz,  $\text{CDCl}_3$ )  $\delta$  160.8, 155.1, 153.3, 151.4, 149.7, 148.7, 143.1, 137.4, 124.9, 124.6, 114.4, 108.1, 106.0, 78.5, 71.5, 56.4, 56.3, 33.8; HRMS (ESI)  $m/z$  calcd for  $\text{C}_{18}\text{H}_{16}\text{N}_3\text{O}_3$   $[\text{M} + \text{H}]^+$ : 322.1186, found 322.1214.

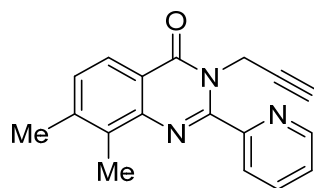

**1q**

**7,8-dimethyl-3-(prop-2-yn-1-yl)-2-(pyridin-2-yl)quinazolin-4(3H)-one (1q).**

Purification by flash column chromatography (2/1, ethyl acetate/petroleum ether) to afford **1q**. A off-white solid, 0.147 g, 51% yield; Mp: 130-131 °C; <sup>1</sup>H NMR (400 MHz, CDCl<sub>3</sub>) δ 8.72 (d, *J* = 4.4 Hz, 1H), 8.13 (d, *J* = 8.0 Hz, 1H), 8.03 (d, *J* = 8.0 Hz, 1H), 7.93-7.90 (m, 1H), 7.47-7.43 (m, 1H), 7.35 (d, *J* = 8.0 Hz, 1H), 5.39 (d, *J* = 1.6 Hz, 2H), 2.57 (s, 3H), 2.45 (s, 3H), 1.98 (s, 1H); <sup>13</sup>C NMR (100 MHz, CDCl<sub>3</sub>) δ 162.2, 153.9, 150.7, 148.2, 145.2, 143.6, 137.2, 134.3, 129.5, 125.4, 124.5, 124.0, 118.9, 78.8, 71.3, 33.5, 20.9, 13.0; HRMS (ESI) *m/z* calcd for C<sub>18</sub>H<sub>16</sub>N<sub>3</sub>O [M + H]<sup>+</sup>: 290.1288, found 290.1311.

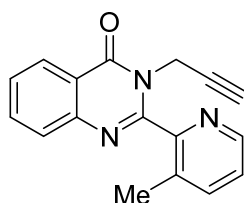

**1r**

**2-(3-methylpyridin-2-yl)-3-(prop-2-yn-1-yl)quinazolin-4(3H)-one (1r).**

Purification by flash column chromatography (2/1, ethyl acetate/petroleum ether) to afford **1r**. A white solid, 0.061 g, 22% yield; Mp: 186-187 °C; <sup>1</sup>H NMR (400 MHz, CDCl<sub>3</sub>) δ 8.55 (d, *J* = 4.0 Hz, 1H), 8.39 (d, *J* = 7.6 Hz, 1H), 7.81-7.77 (m, 1H), 7.74-7.71 (m, 2H), 7.57-7.53 (m, 1H), 7.39 (dd, *J* = 7.6, 4.8 Hz, 1H), 4.91 (s, 2H), 2.43 (s, 3H), 2.05 (s, 1H); <sup>13</sup>C NMR (100 MHz, CDCl<sub>3</sub>) δ 161.3, 152.2, 151.8, 147.0, 146.7, 139.3, 134.6, 133.3, 127.6, 127.1, 124.7, 121.1, 77.6, 71.5, 33.4, 18.7; HRMS (ESI) *m/z* calcd for C<sub>17</sub>H<sub>14</sub>N<sub>3</sub>O [M + H]<sup>+</sup>: 276.1131, found 276.1150.

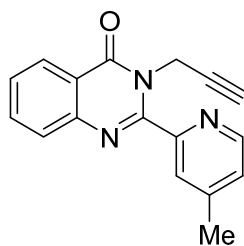

**1s**

**2-(4-methylpyridin-2-yl)-3-(prop-2-yn-1-yl)quinazolin-4(3H)-one (1s).** Purification by flash column chromatography (2/1, ethyl acetate/petroleum ether) to afford **1s**. A off-white solid, 0.149 g, 54% yield; Mp: 160-161 °C; <sup>1</sup>H NMR (400 MHz, CDCl<sub>3</sub>) δ 8.58 (d, *J* = 4.8 Hz, 1H), 8.38 (d, *J* = 8.0 Hz, 1H), 7.81-7.77 (m, 3H), 7.56-7.52 (m, 1H), 7.29 (d, *J* = 4.4 Hz, 1H), 5.28 (d, *J* = 2.0 Hz, 2H), 2.49 (s, 3H), 2.05 (s, 1H); <sup>13</sup>C NMR (100 MHz, CDCl<sub>3</sub>) δ 161.6, 153.0, 152.8, 148.9, 148.5, 147.0, 134.6, 127.7, 127.6, 127.1, 125.8, 125.7, 121.0, 78.4, 71.5, 33.9, 21.2; HRMS (ESI) *m/z* calcd for C<sub>17</sub>H<sub>14</sub>N<sub>3</sub>O [M + H]<sup>+</sup>: 276.1131, found 276.1157.

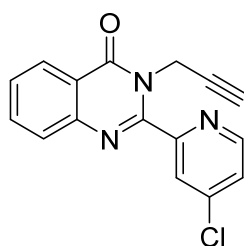

**1t**

**2-(4-chloropyridin-2-yl)-3-(prop-2-yn-1-yl)quinazolin-4(3H)-one (1t).** Purification by flash column chromatography (2/1, ethyl acetate/petroleum ether) to afford **1t**. A white solid, 0.100 g, 34% yield; Mp: 190-191 °C; <sup>1</sup>H NMR (400 MHz, CDCl<sub>3</sub>) δ 8.61 (d, *J* = 5.2 Hz, 1H), 8.37 (d, *J* = 7.6 Hz, 1H), 8.00 (s, 1H), 7.82-7.75 (m, 2H), 7.57-7.54 (m, 1H), 7.48 (d, *J* = 4.0 Hz, 1H), 5.34 (s, 2H), 2.05 (s, 1H); <sup>13</sup>C NMR (100 MHz, CDCl<sub>3</sub>) δ 161.4, 154.5, 151.3, 149.4, 146.7, 145.4, 134.7, 127.9, 127.7, 127.2, 125.6, 125.1, 121.0, 78.2, 71.9, 33.6; HRMS (ESI) *m/z* calcd for C<sub>16</sub>H<sub>11</sub>ClN<sub>3</sub>O [M + H]<sup>+</sup>: 296.0585, found 296.0605.

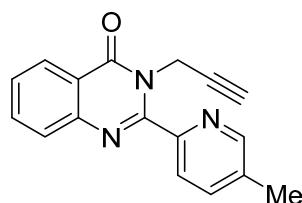

**1u**

**2-(5-methylpyridin-2-yl)-3-(prop-2-yn-1-yl)quinazolin-4(3H)-one (1u).** Purification by flash column chromatography (2/1, ethyl acetate/petroleum ether) to afford **1u**. A yellow solid, 0.160 g, 58% yield; Mp: 156-157 °C; <sup>1</sup>H NMR (400 MHz, CDCl<sub>3</sub>) δ 8.54 (s, 1H), 8.36 (d, *J* = 8.0 Hz, 1H), 7.86 (d, *J* = 7.6 Hz, 1H), 7.79-7.71 (m, 3H), 7.54-7.50 (d, *J* = 4.4 Hz, 1H), 5.30 (d, *J* = 2.0 Hz, 2H), 2.45 (s, 3H), 2.03 (s, 1H); <sup>13</sup>C NMR (100



MHz, CDCl<sub>3</sub>)  $\delta$  161.6, 152.6, 150.6, 149.0, 147.0, 137.8, 134.9, 134.5, 127.7, 127.5, 127.1, 124.6, 120.9, 78.5, 71.5, 33.8, 18.5; HRMS (ESI)  $m/z$  calcd for C<sub>17</sub>H<sub>14</sub>N<sub>3</sub>O [M + H]<sup>+</sup>: 276.1131, found 276.1147.

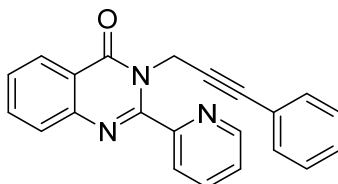

**1v**

**3-(3-phenylprop-2-yn-1-yl)-2-(pyridin-2-yl)quinazolin-4(3H)-one (1v).** Purification by flash column chromatography (2/1, ethyl acetate/petroleum ether) to afford **2v**. A yellow solid, 0.179 g, 53% yield; Mp: 105-106 °C; <sup>1</sup>H NMR (400 MHz, CDCl<sub>3</sub>)  $\delta$  8.75 (d,  $J$  = 4.4 Hz, 1H), 8.40 (d,  $J$  = 8.0 Hz, 1H), 7.96-7.90 (m, 2H), 7.81-7.76 (m, 2H), 7.57-7.53 (m, 1H), 7.49-7.46 (m, 1H), 7.25-7.19 (m, 3H), 7.15 (d,  $J$  = 6.8 Hz, 2H), 5.57 (s, 2H), 1.59 (s, 1H); <sup>13</sup>C NMR (100 MHz, CDCl<sub>3</sub>)  $\delta$  161.5, 153.6, 152.8, 148.7, 147.0, 137.3, 134.5, 131.7, 128.4, 128.1, 127.7, 127.6, 127.2, 124.9, 124.7, 122.2, 121.0, 83.9, 83.3, 34.1; HRMS (ESI)  $m/z$  calcd for C<sub>22</sub>H<sub>15</sub>N<sub>3</sub>NaO [M + Na]<sup>+</sup>: 360.1107, found 360.1122.

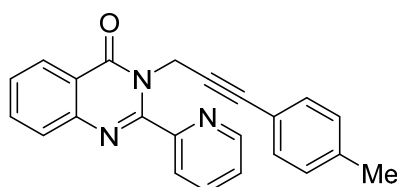

**1w**

**2-(pyridin-2-yl)-3-(3-(p-tolyl)prop-2-yn-1-yl)quinazolin-4(3H)-one (1w).** Purification by flash column chromatography (2/1, ethyl acetate/petroleum ether) to afford **1w**. A yellow solid, 0.176 g, 50% yield; Mp: 145-146 °C; <sup>1</sup>H NMR (400 MHz, CDCl<sub>3</sub>)  $\delta$  8.74 (d,  $J$  = 4.8 Hz, 1H), 8.39 (d,  $J$  = 8.0 Hz, 1H), 7.94-7.89 (m, 2H), 7.78-7.75 (m, 2H), 7.56-7.52 (m, 1H), 7.48-7.45 (m, 1H), 7.04-7.00 (m, 4H), 5.55 (s, 2H), 2.28 (s, 3H); <sup>13</sup>C NMR (100 MHz, CDCl<sub>3</sub>)  $\delta$  161.5, 153.7, 152.8, 148.7, 147.0, 138.6, 137.2, 134.5, 131.6, 128.9, 127.7, 127.5, 127.2, 124.9, 124.6, 121.0, 119.1, 83.9, 83.1, 34.1, 21.4; HRMS (ESI)  $m/z$  calcd for C<sub>23</sub>H<sub>18</sub>N<sub>3</sub>O [M + H]<sup>+</sup>: 352.1444, found 352.1461.

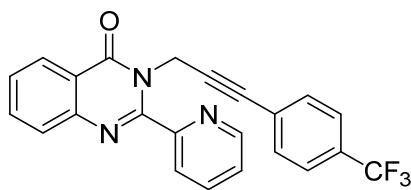

**1x**

**2-(pyridin-2-yl)-3-(3-(4-(trifluoromethyl)phenyl)prop-2-yn-1-yl)quinazolin-4(3H)-one (1x).** Purification by flash column chromatography (2/1, ethyl acetate/petroleum ether) to afford **1x**. A yellow solid, 0.137 g, 32% yield; Mp: 164-165 °C; <sup>1</sup>H NMR (400 MHz, CDCl<sub>3</sub>) δ 8.76 (d, *J* = 4.4 Hz, 1H), 8.40 (d, *J* = 7.6 Hz, 1H), 7.98-7.91 (m, 2H), 7.80-7.77 (m, 2H), 7.58-7.54 (m, 1H), 7.48 (d, *J* = 8.0 Hz, 3H), 7.27 (d, *J* = 7.6 Hz, 2H), 5.61 (s, 2H); <sup>13</sup>C NMR (100 MHz, CDCl<sub>3</sub>) δ 161.6, 153.5, 152.5, 149.5 (q, *J* = 255.2 Hz), 148.7, 137.4 (q, *J* = 25.5 Hz), 137.3, 134.7, 131.9, 130.6 (q, *J* = 32.8 Hz), 127.7, 127.6, 127.2, 126.0, 125.1 (q, *J* = 3.6 Hz), 124.8, 122.4, 120.9, 86.5, 81.9, 34.1; <sup>19</sup>F NMR (376 MHz, CDCl<sub>3</sub>) δ -63.3; <sup>19</sup>F NMR (376 MHz, CDCl<sub>3</sub>) δ -62.9; HRMS (ESI) *m/z* calcd for C<sub>23</sub>H<sub>14</sub>F<sub>3</sub>N<sub>3</sub>NaO [M + Na]<sup>+</sup>: 428.0981, found 428.0997.

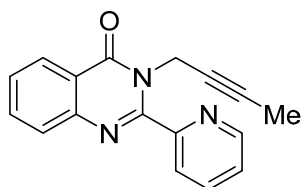

**1y**

**3-(but-2-yn-1-yl)-2-(pyridin-2-yl)quinazolin-4(3H)-one (1y).** Purification by flash column chromatography (2/1, ethyl acetate/petroleum ether) to afford **1y**. A grey solid, 0.154 g, 56% yield; Mp: 160-161 °C; <sup>1</sup>H NMR (400 MHz, CDCl<sub>3</sub>) δ 8.72 (d, *J* = 4.4 Hz, 1H), 8.37 (d, *J* = 7.6 Hz, 1H), 7.94-7.89 (m, 2H), 7.80-7.74 (m, 2H), 7.55-7.49 (m, 1H), 7.47-7.44 (m, 1H), 5.18 (d, *J* = 2.0 Hz, 2H), 1.60 (s, 3H); <sup>13</sup>C NMR (100 MHz, CDCl<sub>3</sub>) δ 161.6, 153.5, 152.9, 148.7, 147.0, 137.2, 134.4, 127.6, 127.4, 127.1, 124.7, 124.6, 121.1, 79.6, 73.6, 34.2; HRMS (ESI) *m/z* calcd for C<sub>17</sub>H<sub>14</sub>N<sub>3</sub>O [M + H]<sup>+</sup>: 276.1131, found 276.1145.

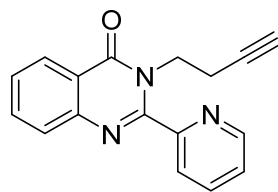

**1z**

**3-(but-3-yn-1-yl)-2-(pyridin-2-yl)quinazolin-4(3H)-one (1z).** Purification by flash column chromatography (2/1, ethyl acetate/petroleum ether) to afford **1z**. A off-white solid, 0.248 g, 90% yield; Mp: 138-139 °C; <sup>1</sup>H NMR (400 MHz, CDCl<sub>3</sub>) δ 8.71 (d, *J* = 4.4 Hz, 1H), 8.34 (d, *J* = 8.4 Hz, 1H), 7.93-7.90 (m, 2H), 7.79-7.73 (m, 2H), 7.54-7.50 (m, 1H), 7.46-7.45 (m, 1H), 4.37 (t, *J* = 7.2 Hz, 2H), 2.80-2.77 (m, 2H), 1.88 (s, 1H); <sup>13</sup>C NMR (100 MHz, CDCl<sub>3</sub>) δ 162.1, 153.7, 153.5, 148.6, 146.9, 137.4, 134.4, 127.5, 127.4, 126.8, 125.1, 124.7, 120.9, 80.6, 70.2, 44.3, 18.4; HRMS (ESI) *m/z* calcd for C<sub>17</sub>H<sub>14</sub>N<sub>3</sub>O [M + H]<sup>+</sup>: 276.1131, found 276.1128.

### 8. X-ray structures for compound 3a

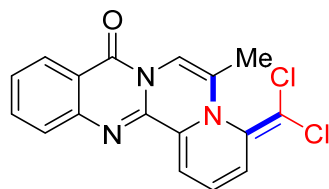

**3a**

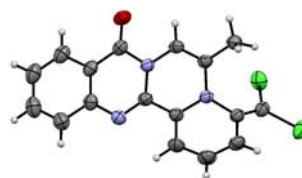

X-ray of **3a**

**Figure S1:** ORTEP diagram of **3a** at 50% ellipsoid probability

The preparation of crystal of **3a**: compound **3a** (30 mg) was dissolved in DCM (5 mL) at room temperature. n-Hexane (1.0 mL) was dropped carefully to the mixture. Then, the flask was capped with thin film. Finally, a needle crystal was obtained for 4 days.

**Table S1.** Crystal data and structure refinement details for compound **3a**.

|                             |                                                                  |
|-----------------------------|------------------------------------------------------------------|
| Empirical formula           | C <sub>17</sub> H <sub>11</sub> Cl <sub>2</sub> N <sub>3</sub> O |
| Formula weight ( <i>M</i> ) | 344.19                                                           |
| Crystal system              | Monoclinic                                                       |
| Space group                 | P 1 21/c 1                                                       |

---

|                                                   |                                                           |
|---------------------------------------------------|-----------------------------------------------------------|
| $a/\text{\AA}$                                    | 14.9897 (4)                                               |
| $b/\text{\AA}$                                    | 4.88490 (10)                                              |
| $c/\text{\AA}$                                    | 21.3648 (5)                                               |
| $\alpha/^\circ$                                   | 90                                                        |
| $\beta/^\circ$                                    | 107.901 (3)                                               |
| $\gamma/^\circ$                                   | 90                                                        |
| $V/\text{\AA}^3$                                  | 1488.66 (7)                                               |
| $Z$                                               | 4                                                         |
| Dc (Mg cm <sup>-3</sup> )                         | 1.536                                                     |
| F (000)                                           | 704                                                       |
| 2 $\theta$ range for data collection ( $^\circ$ ) | 3.098 to 77.464                                           |
| Reflections collected                             | 9563                                                      |
| Independent reflections                           | 2880 [R(int) = 0.0376]                                    |
| Goodness-of-fit on F <sup>2</sup>                 | 1.061                                                     |
| Final R indices [I > 2 $\sigma$ (I)]              | R <sub>1</sub> = 0.0365, $\omega$ R <sub>2</sub> = 0.0964 |
| R indices (all data)                              | R <sub>1</sub> = 0.0464, $\omega$ R <sub>2</sub> = 0.1003 |

---

## 9. References

[1] Kong, X.-F.; Zhan, F.; He, G.-X.; Pan, C.-X.; Gu, C.-X.; Lu, K.; Mo, D.-L.; Su, G.-F. *J. Org. Chem.* **2018**, *83*, 2006.

## 10. NMR spectra for compounds 2, 3a, 4a, 5a, 6, 7 and 1

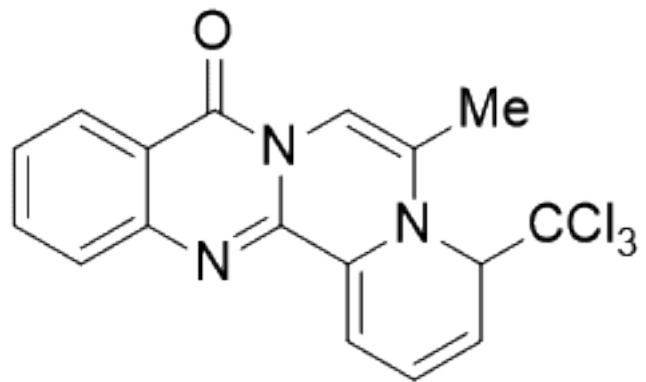

**2a**

400 MHz, CDCl<sub>3</sub>

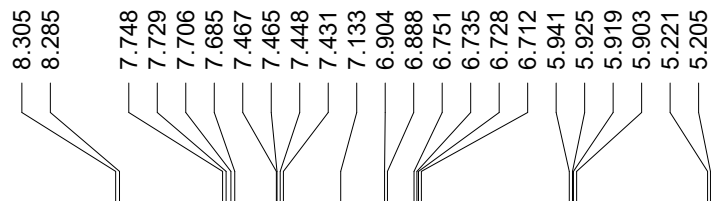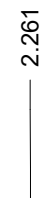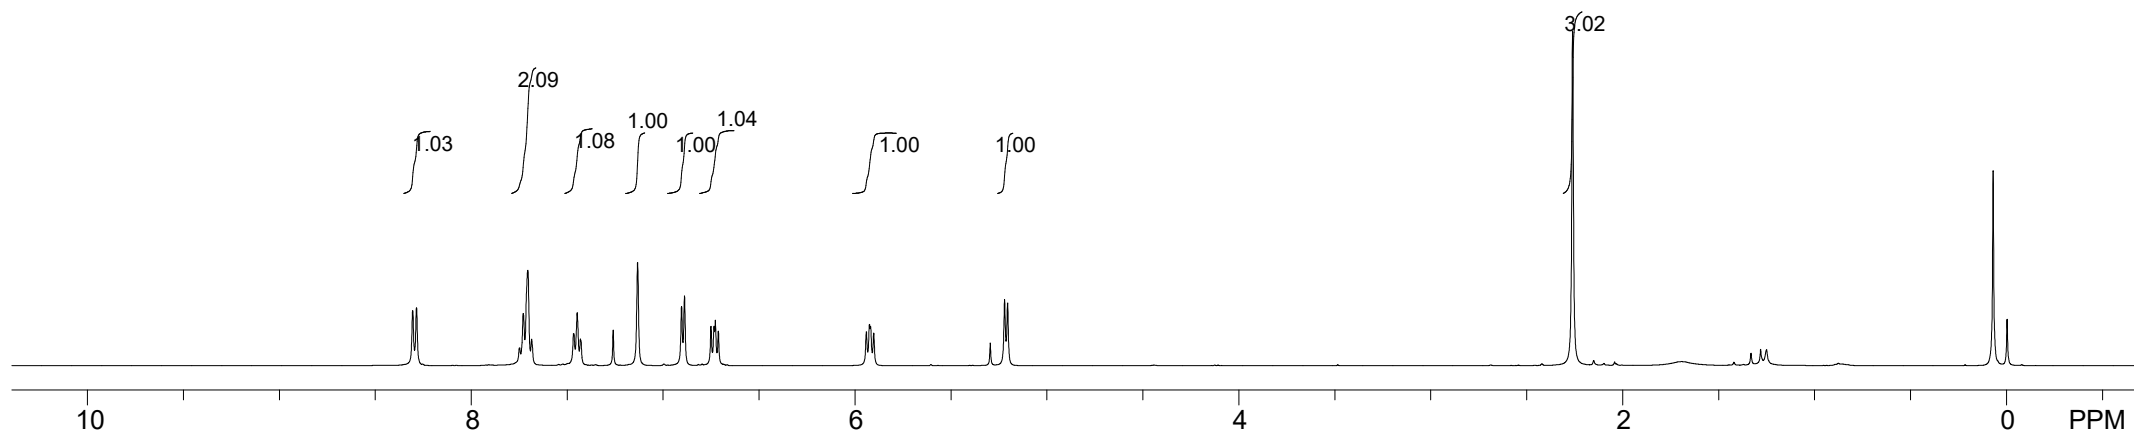

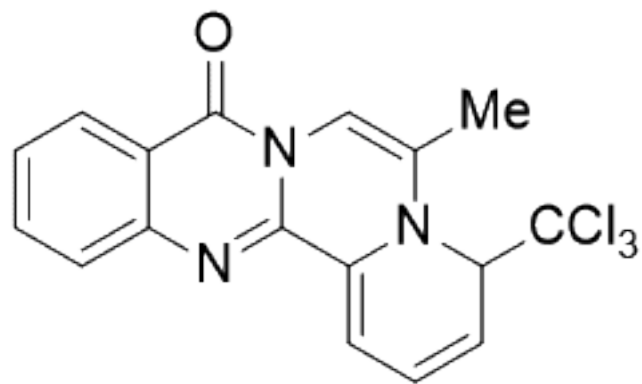

**2a**

125 MHz, CDCl<sub>3</sub>

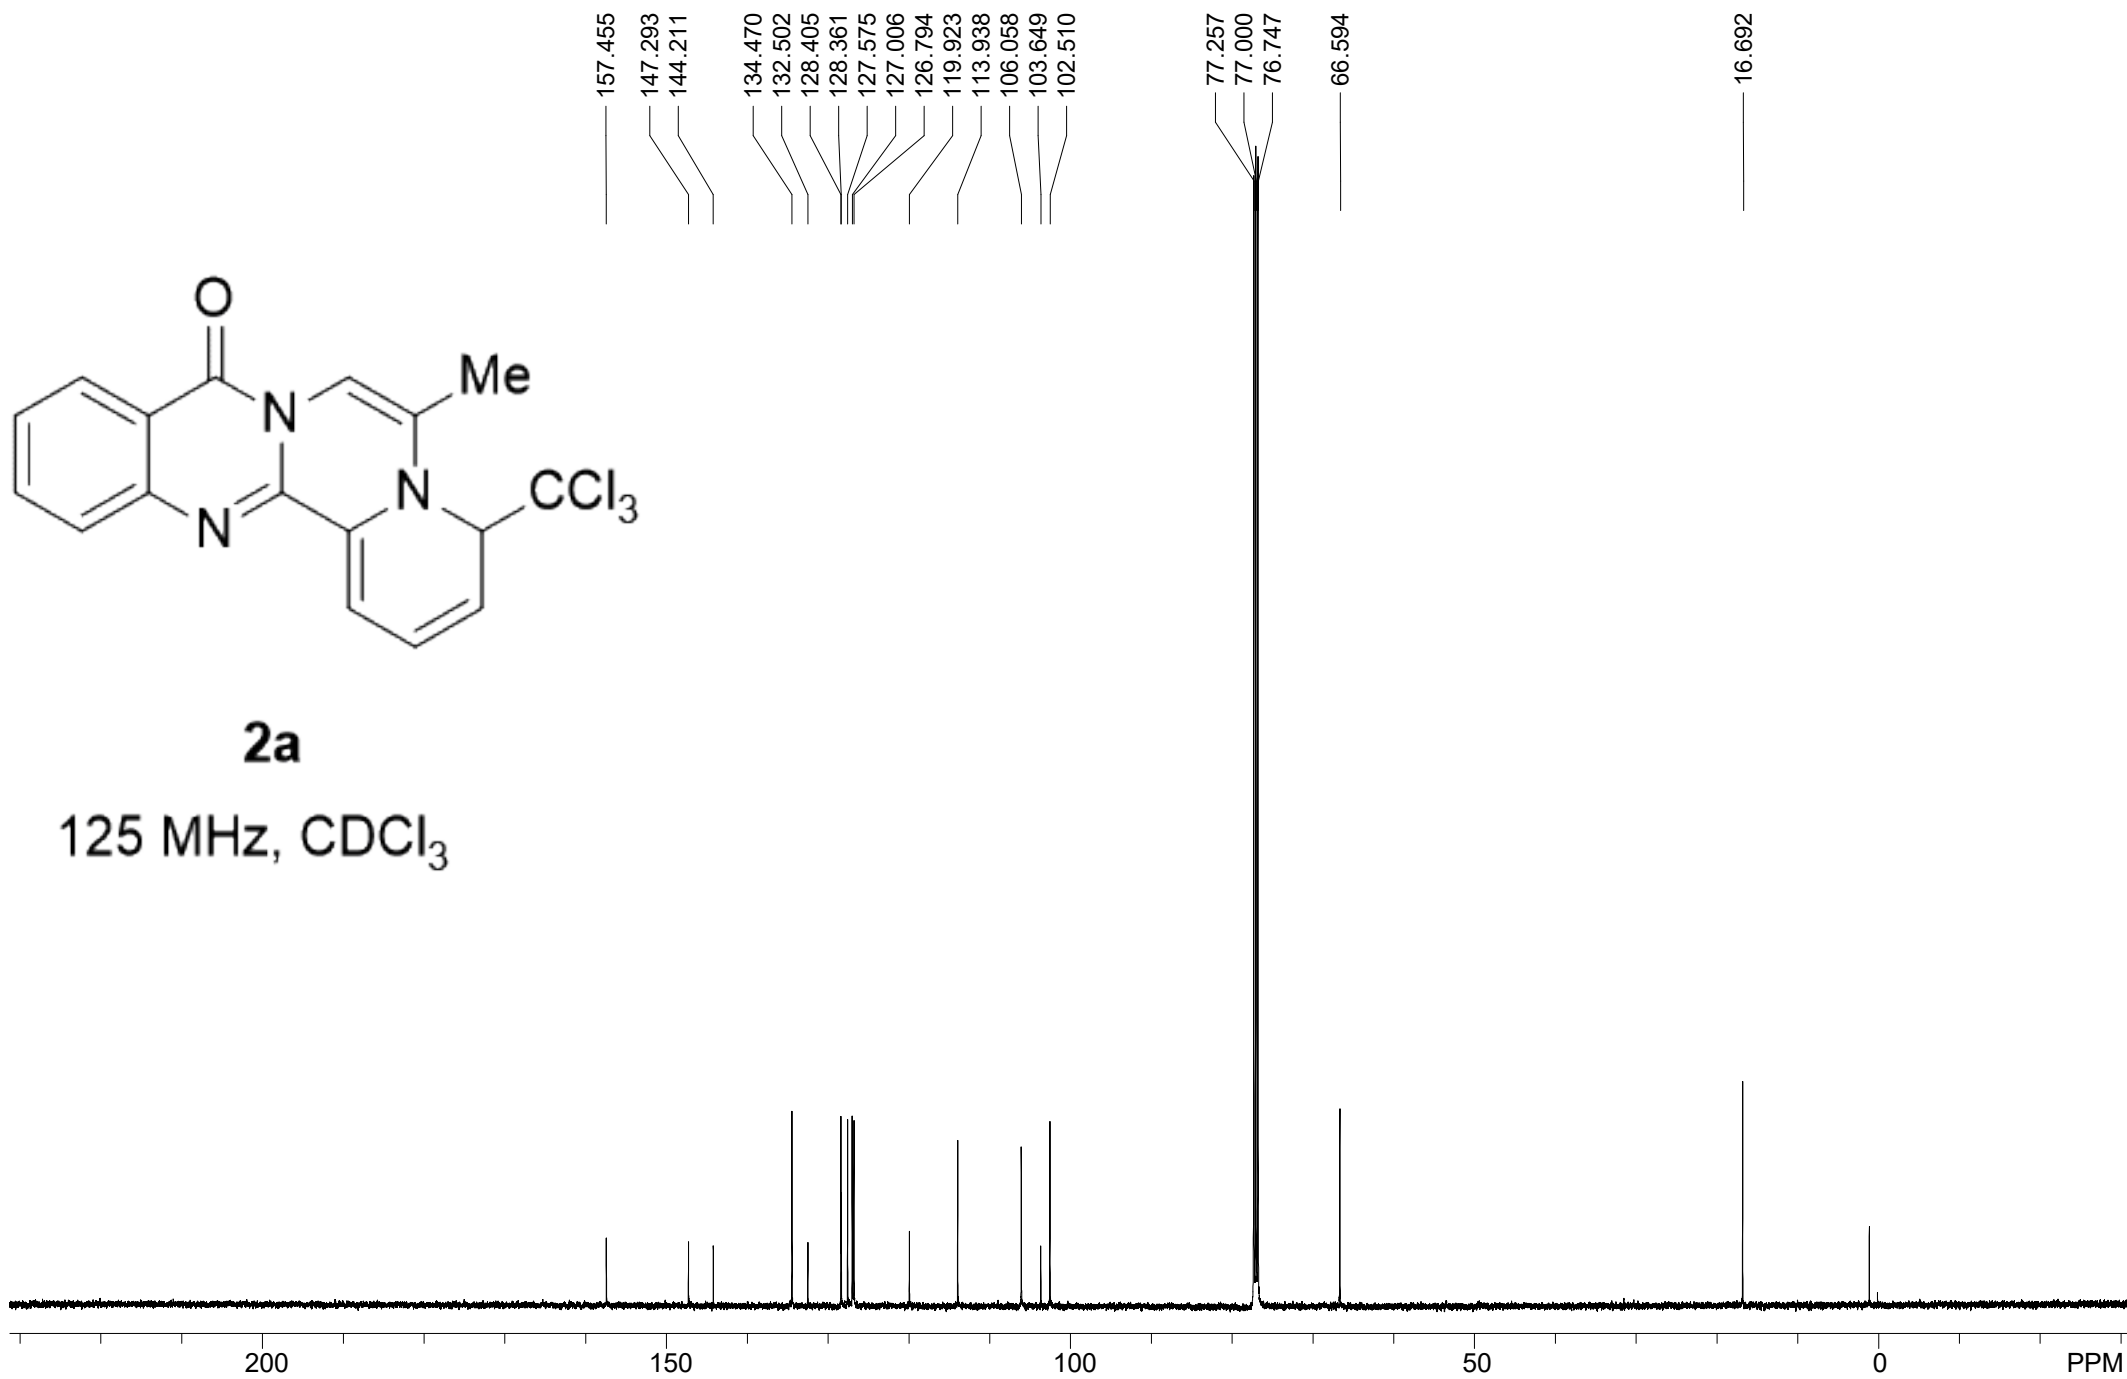

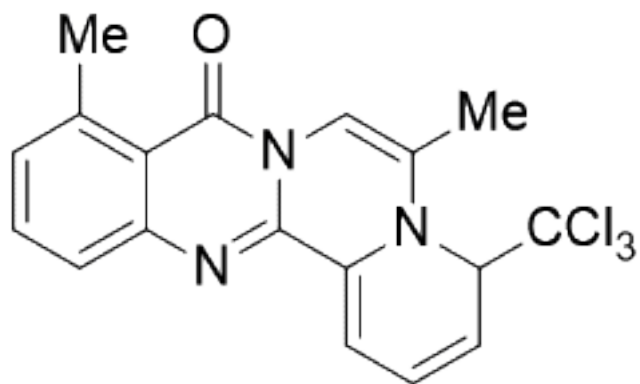

**2b**

400 MHz, CDCl<sub>3</sub>

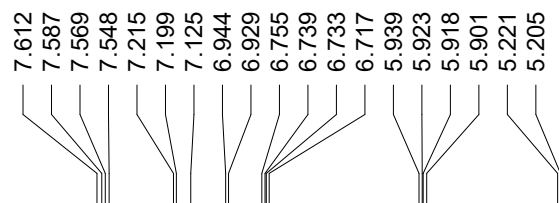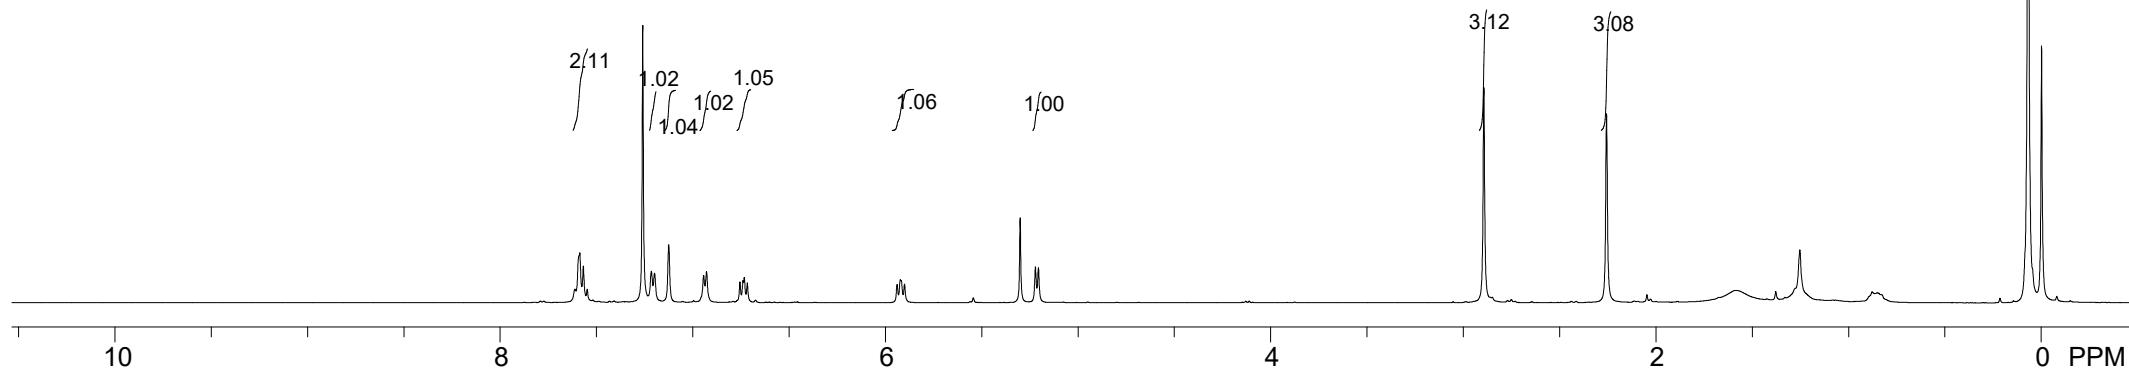

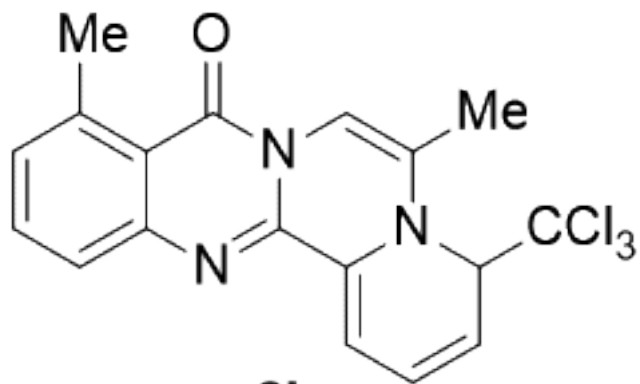

**2b**

150 MHz, CDCl<sub>3</sub>

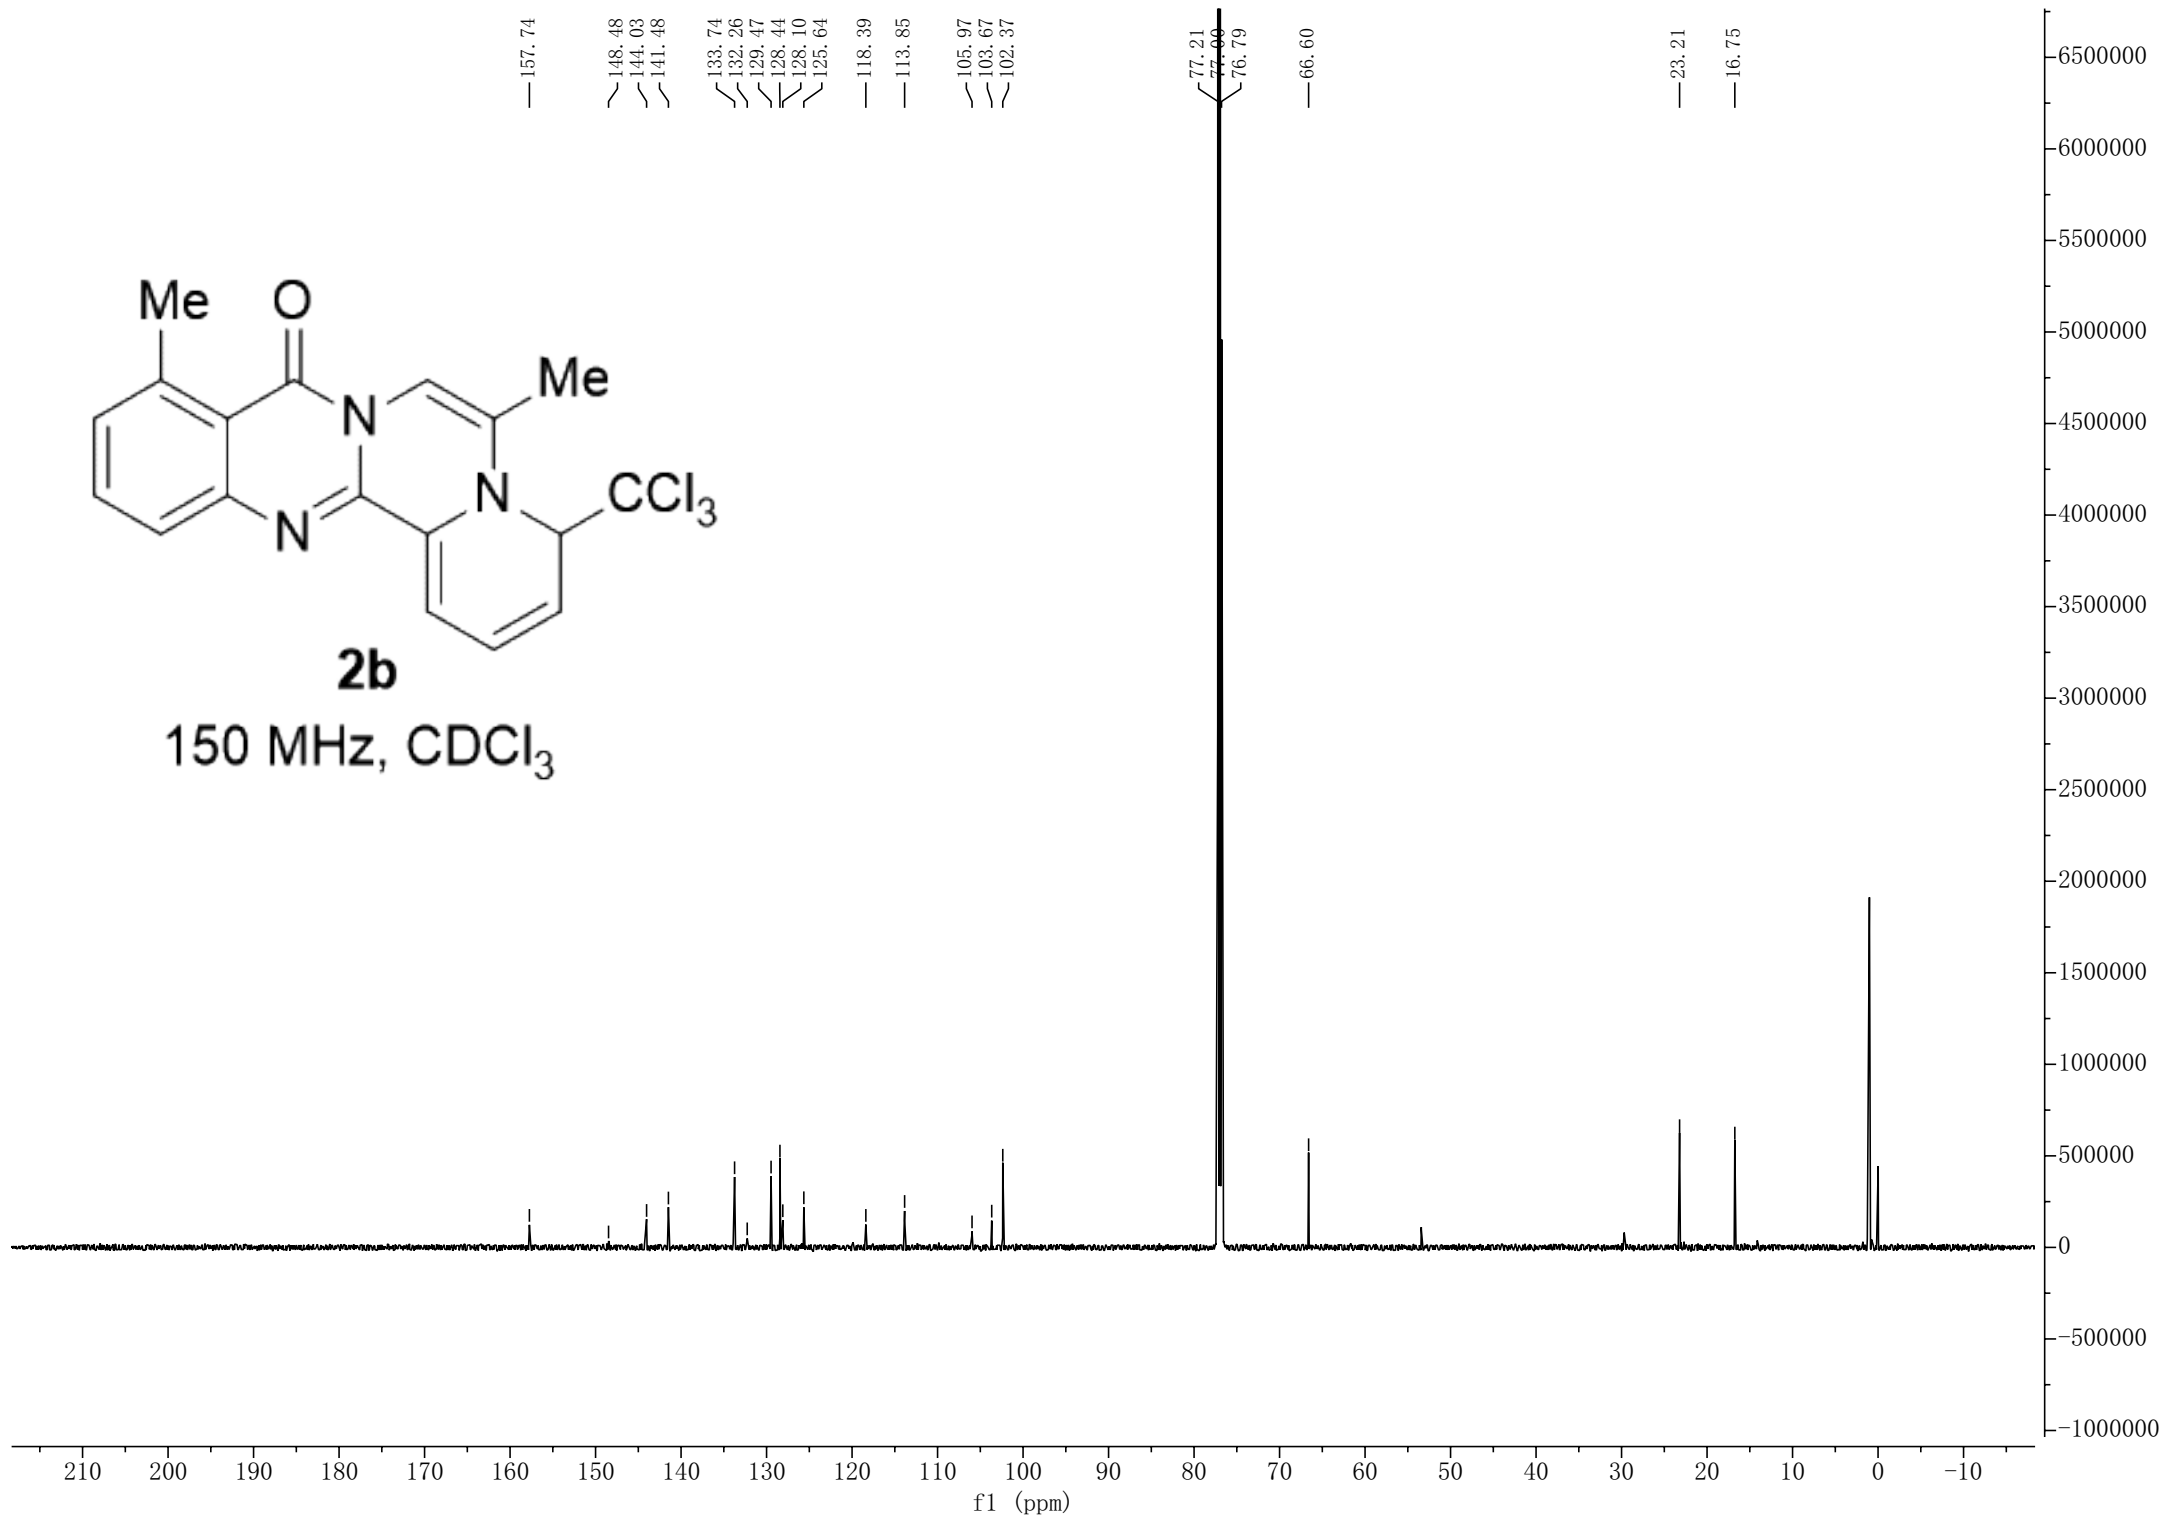



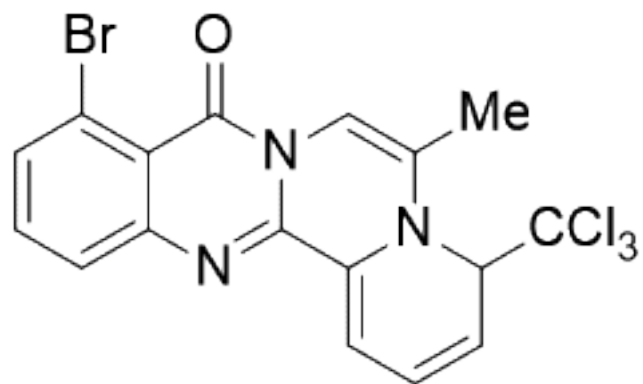

**2c**

400 MHz, CDCl<sub>3</sub>

7.683  
7.663  
7.491  
7.471  
7.451  
7.118  
6.907  
6.892  
6.748  
6.732  
6.726  
6.710  
5.949  
5.933  
5.928  
5.911  
5.215  
5.199

2.249

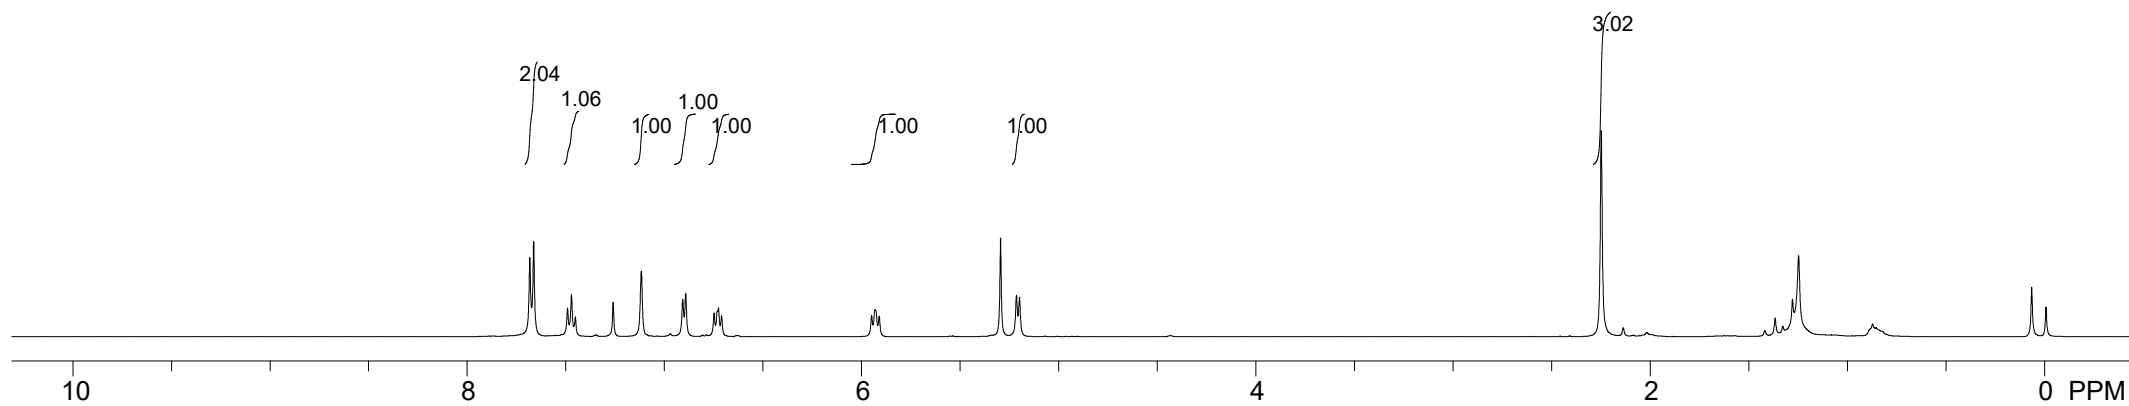

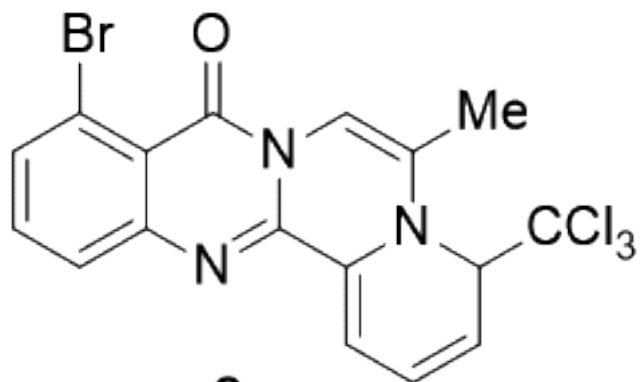

**2c**

100 MHz, CDCl<sub>3</sub>

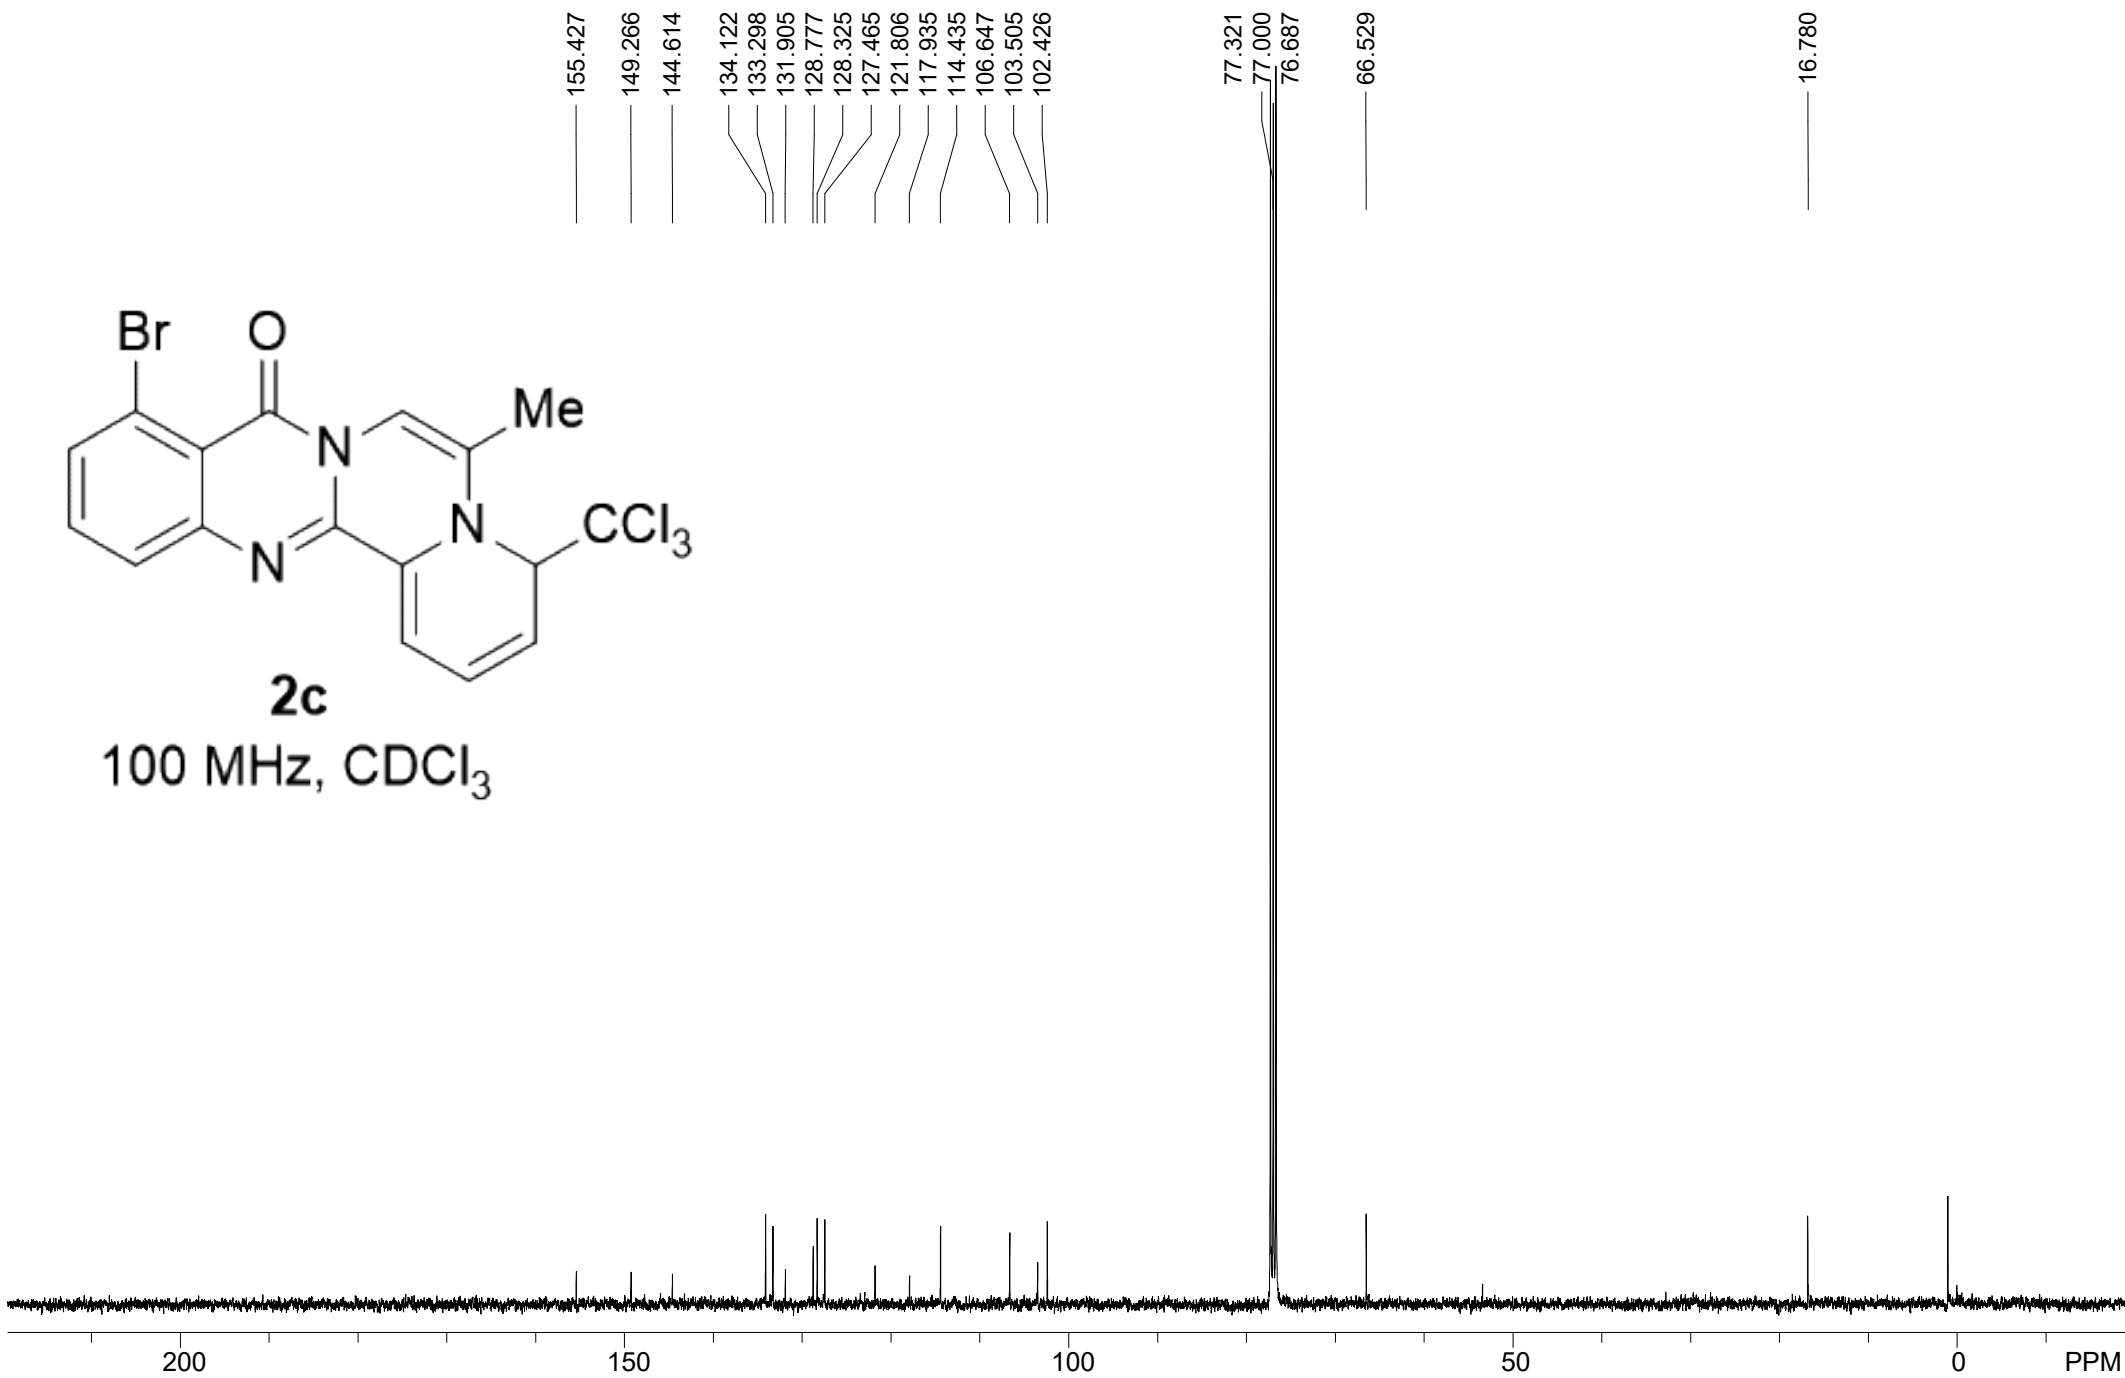

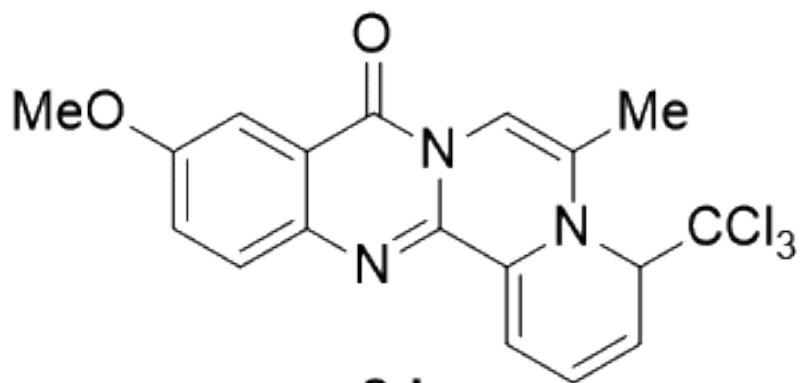

**2d**  
400 MHz, CDCl<sub>3</sub>

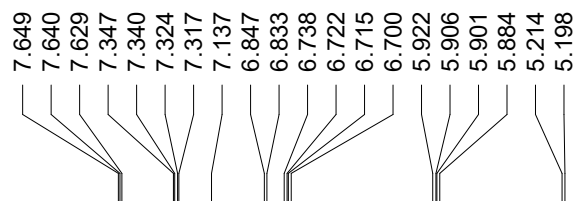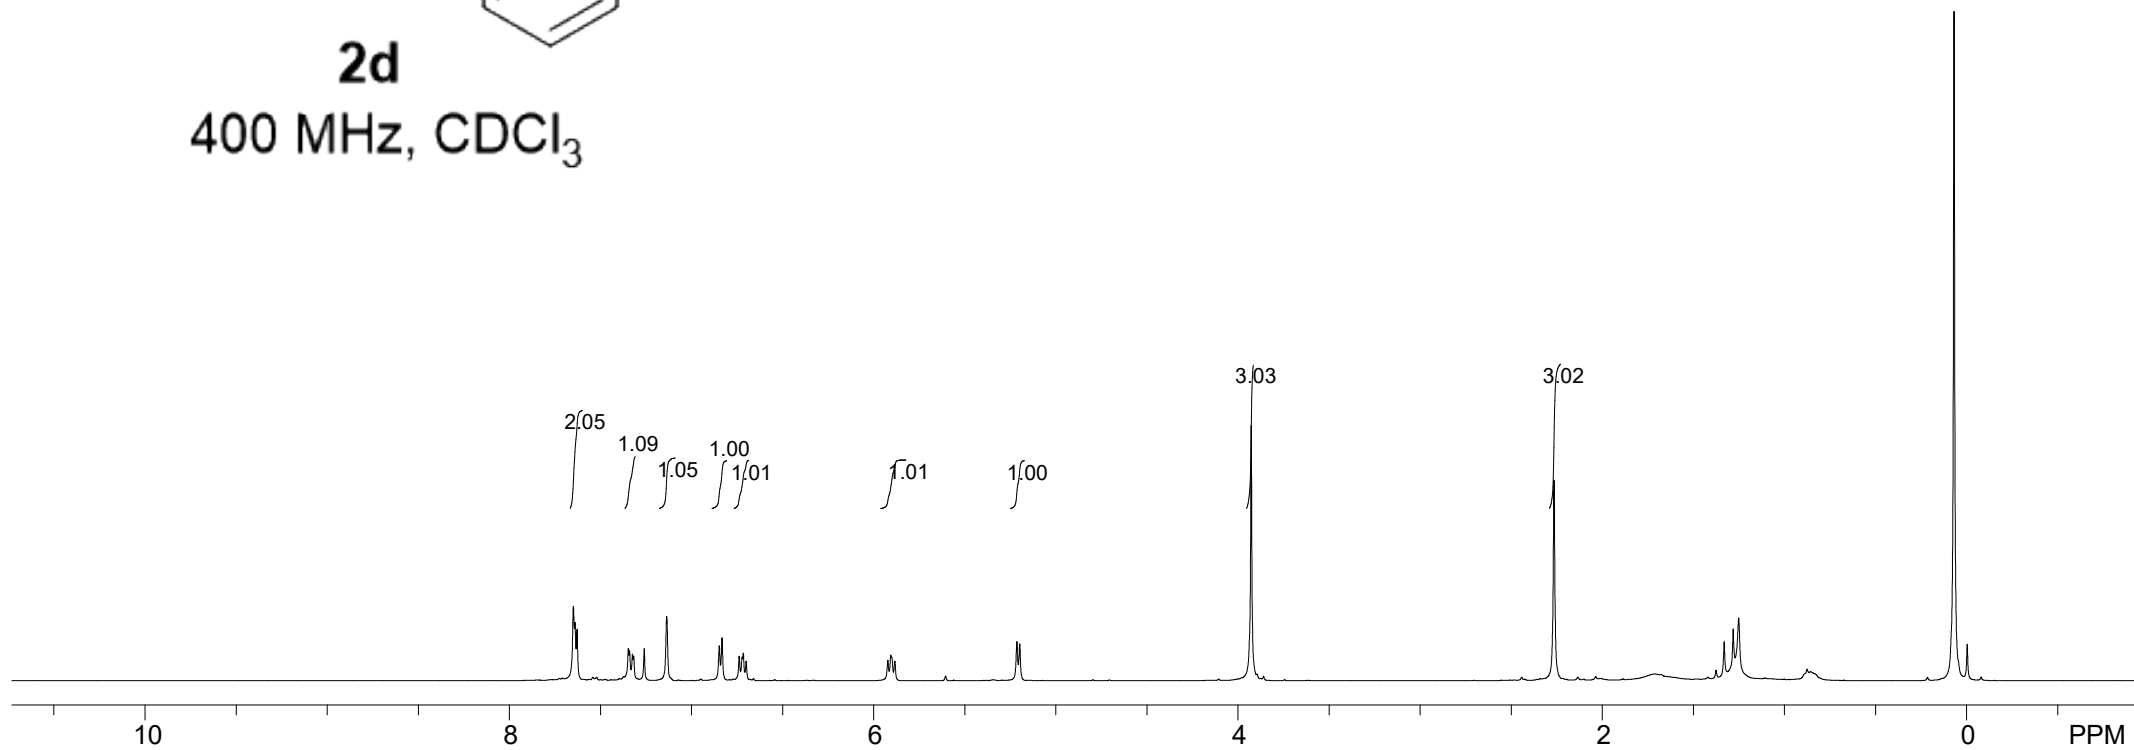

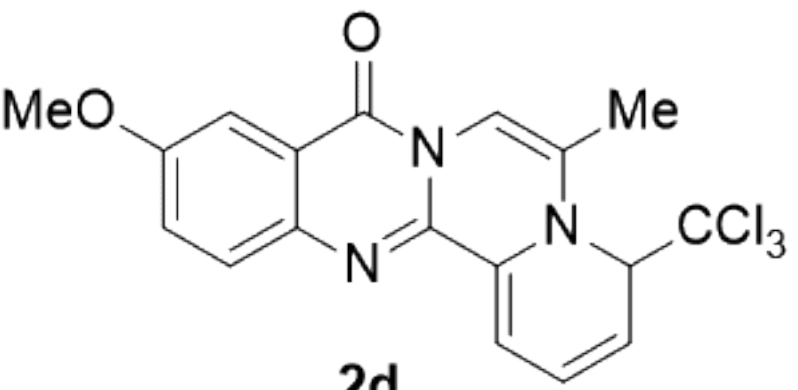

100 MHz, CDCl<sub>3</sub>

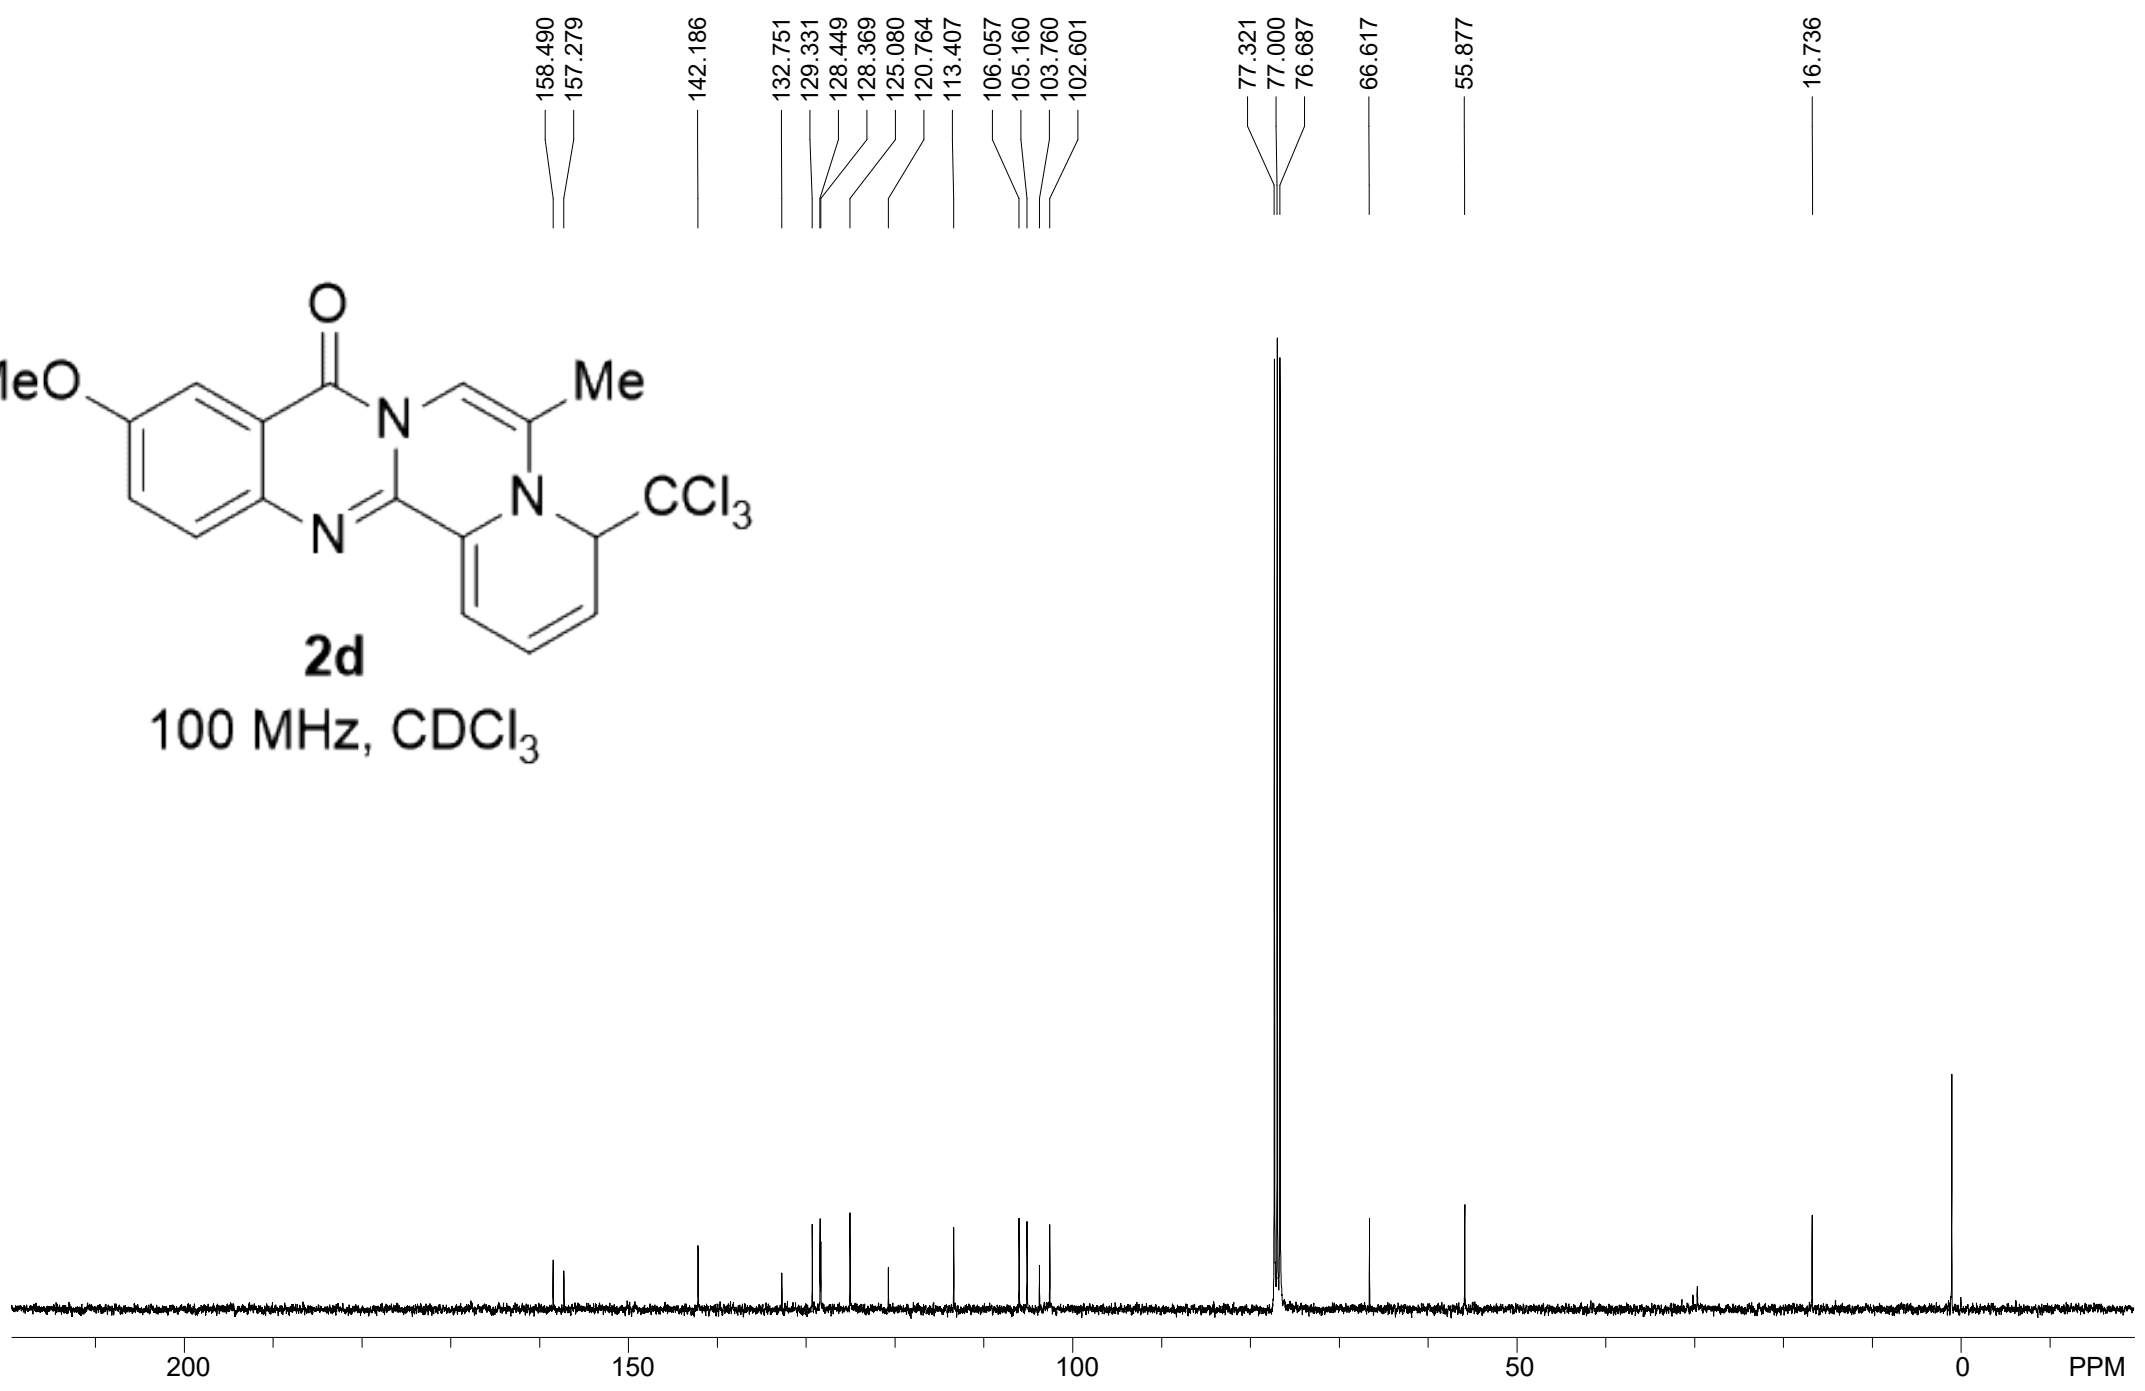

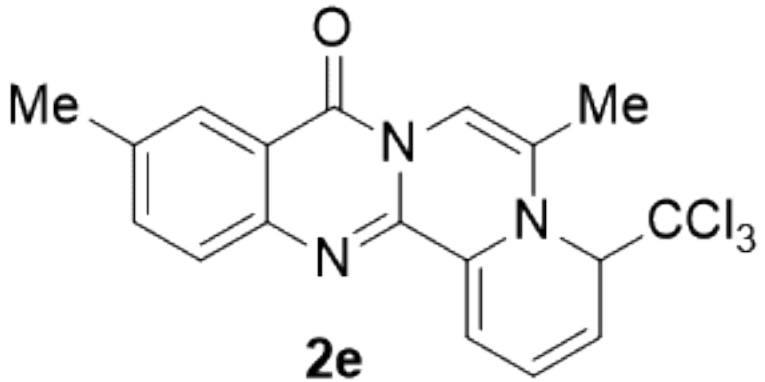

400 MHz, CDCl<sub>3</sub>

8.091  
 7.617  
 7.596  
 7.561  
 7.540  
 7.138  
 6.877  
 6.862  
 6.746  
 6.730  
 6.723  
 6.708  
 5.932  
 5.915  
 5.910  
 5.893  
 5.220  
 5.204

2.488  
 2.260

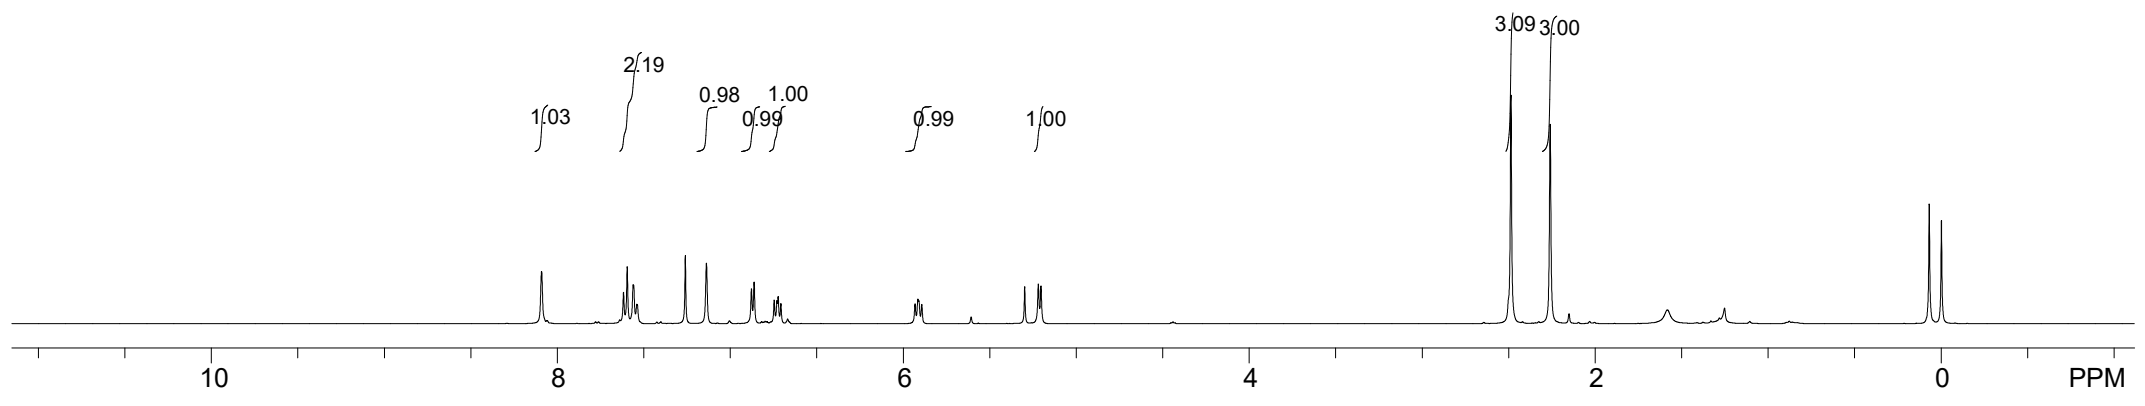

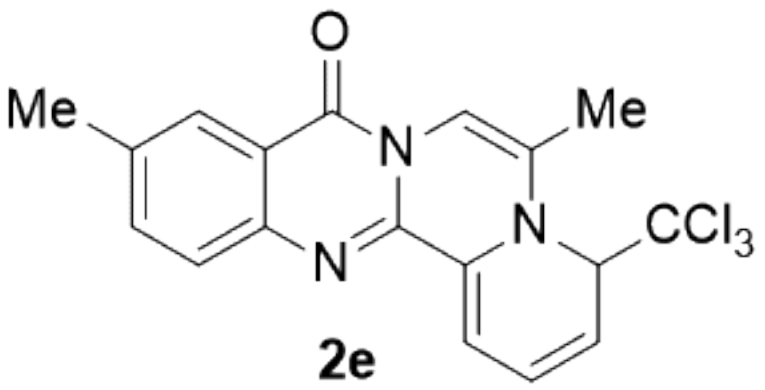

100 MHz, CDCl<sub>3</sub>

- 157.454
- 145.409
- 143.440
- 137.075
- 135.996
- 132.700
- 128.420
- 128.106
- 127.450
- 126.320
- 119.663
- 113.582
- 105.524
- 103.723
- 102.601
- 77.321
- 77.000
- 76.687
- 66.602
- 21.351
- 16.692

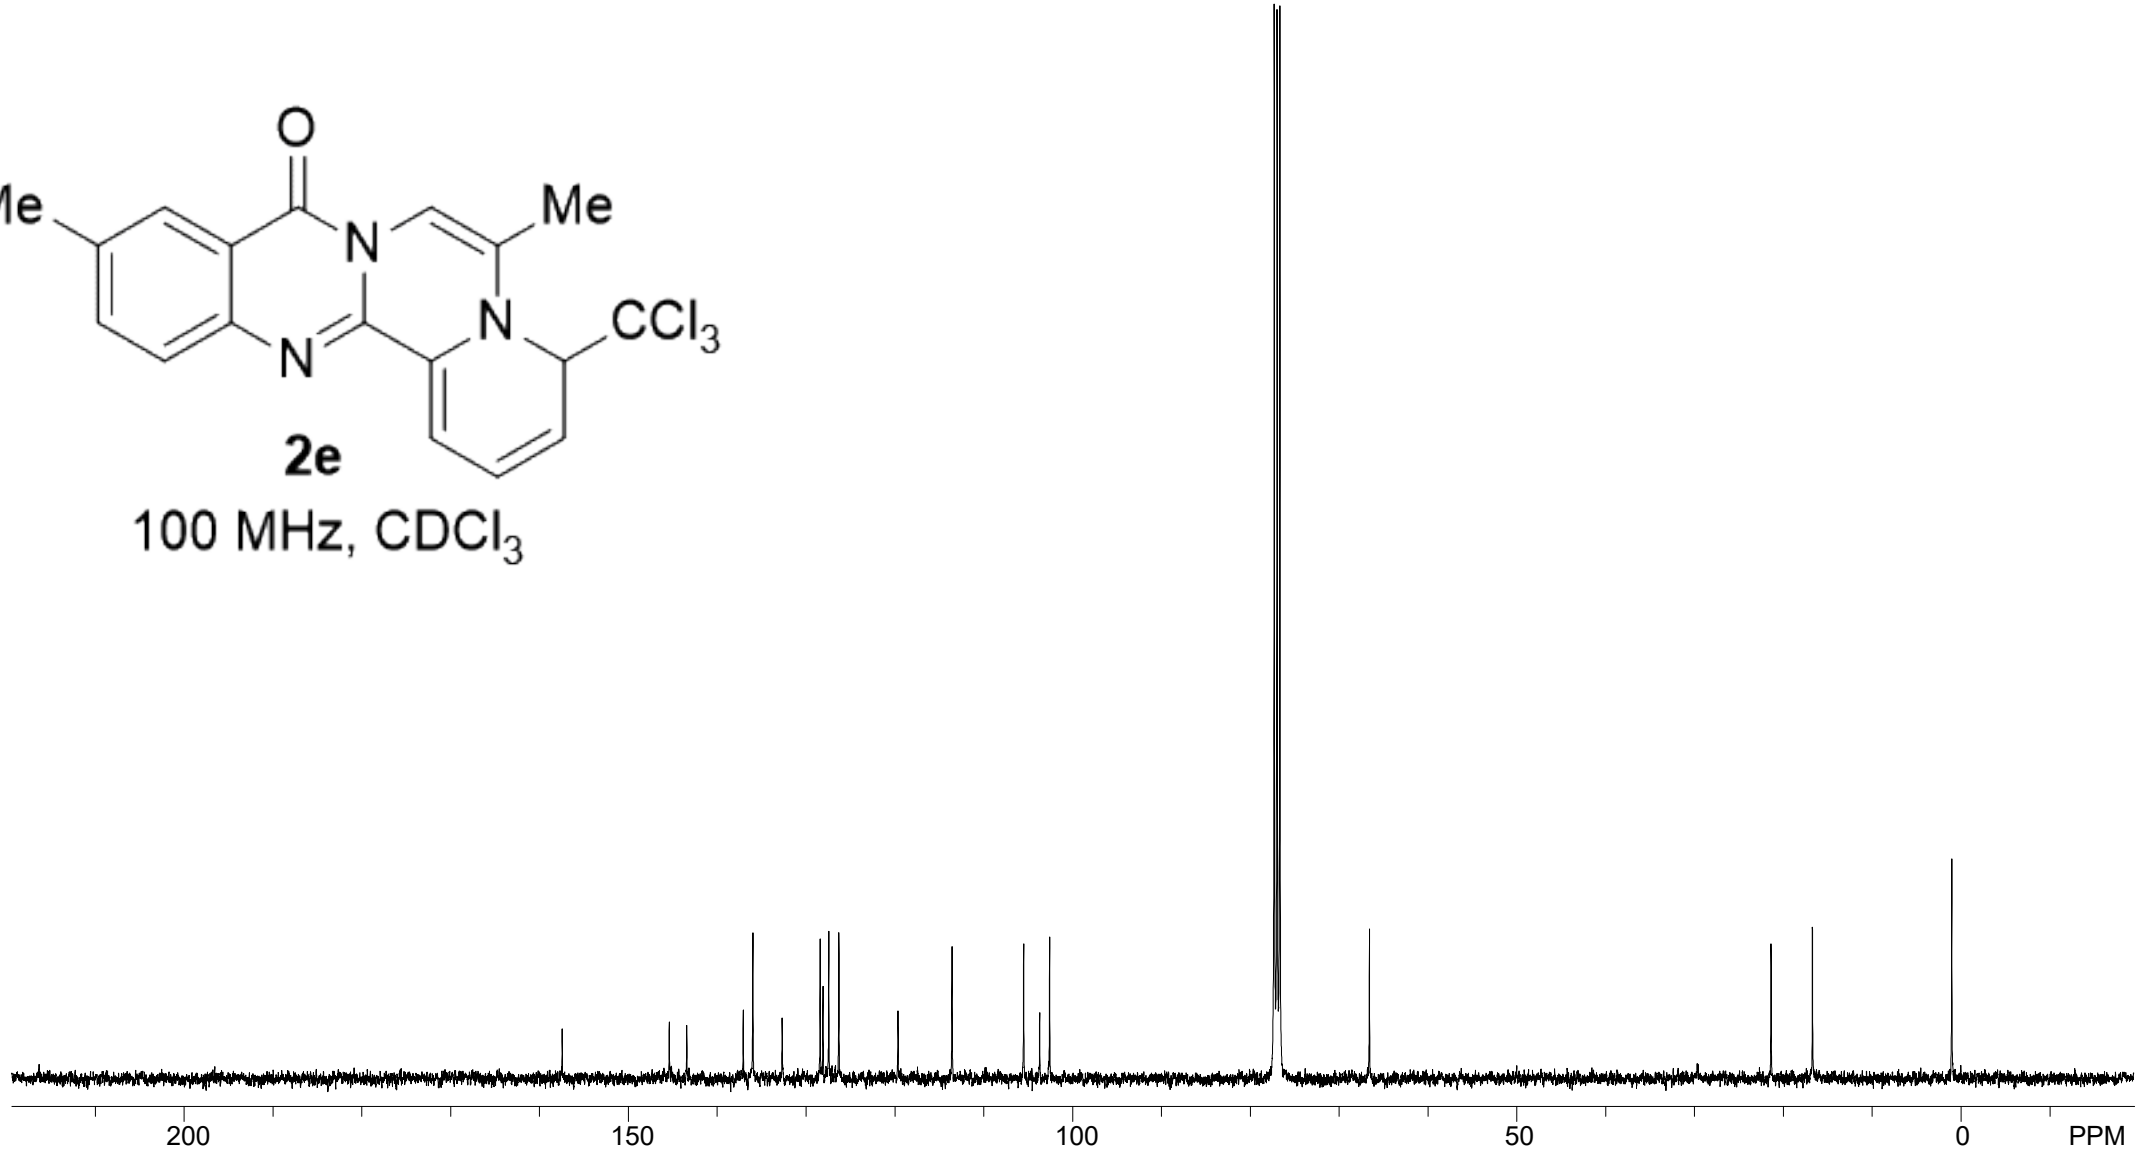

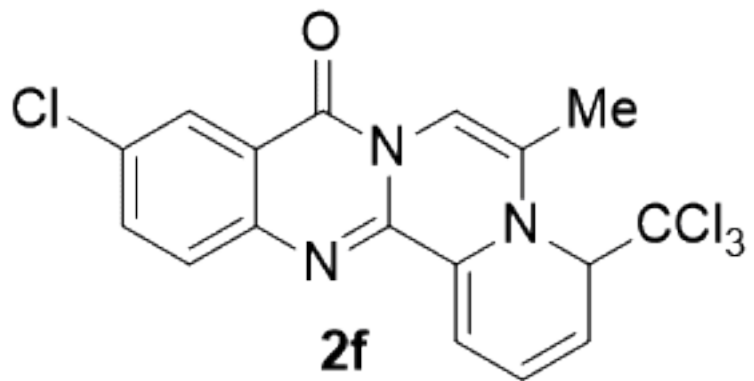

400 MHz, CDCl<sub>3</sub>

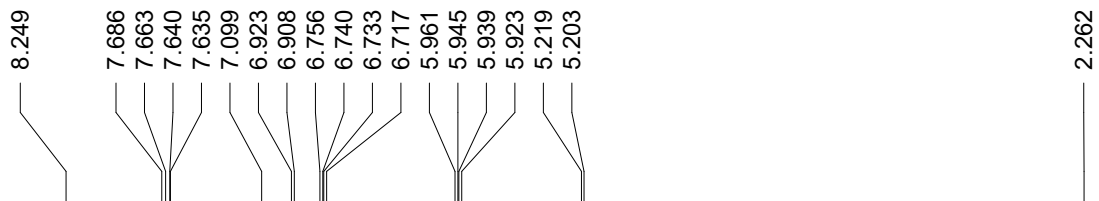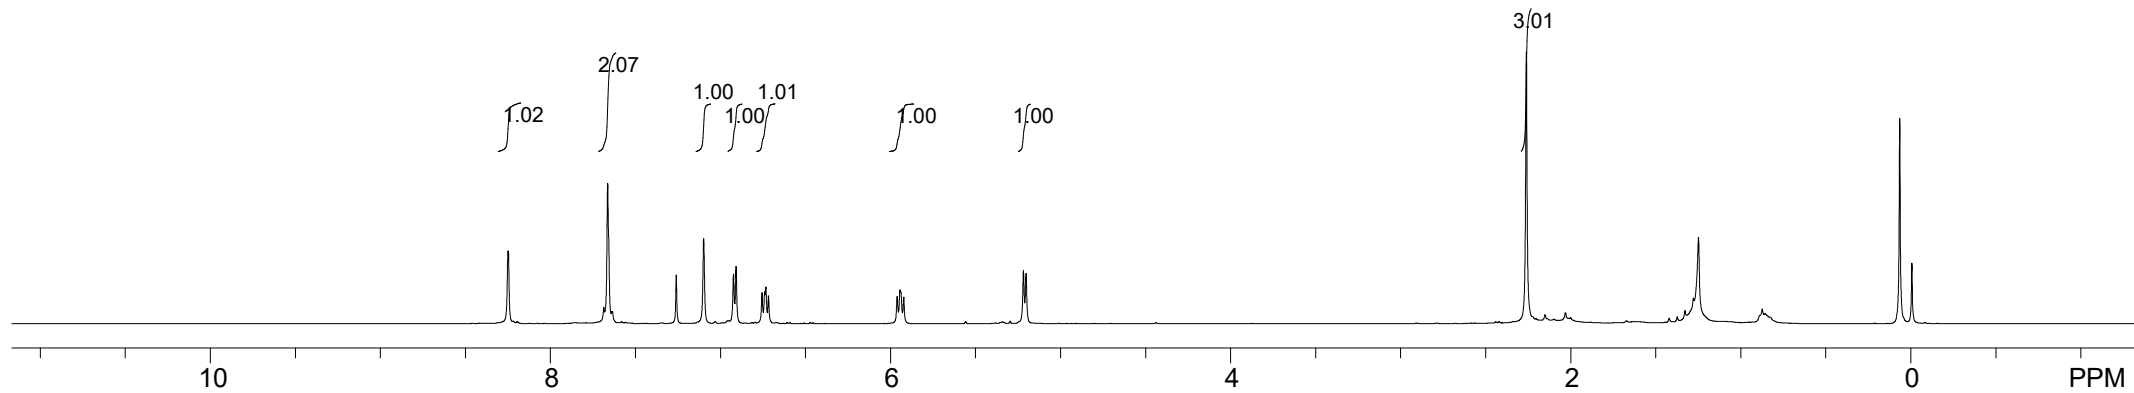

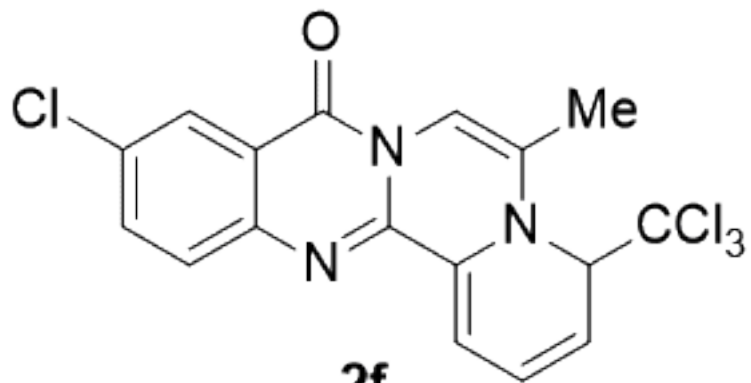

**2f**

100 MHz, CDCl<sub>3</sub>

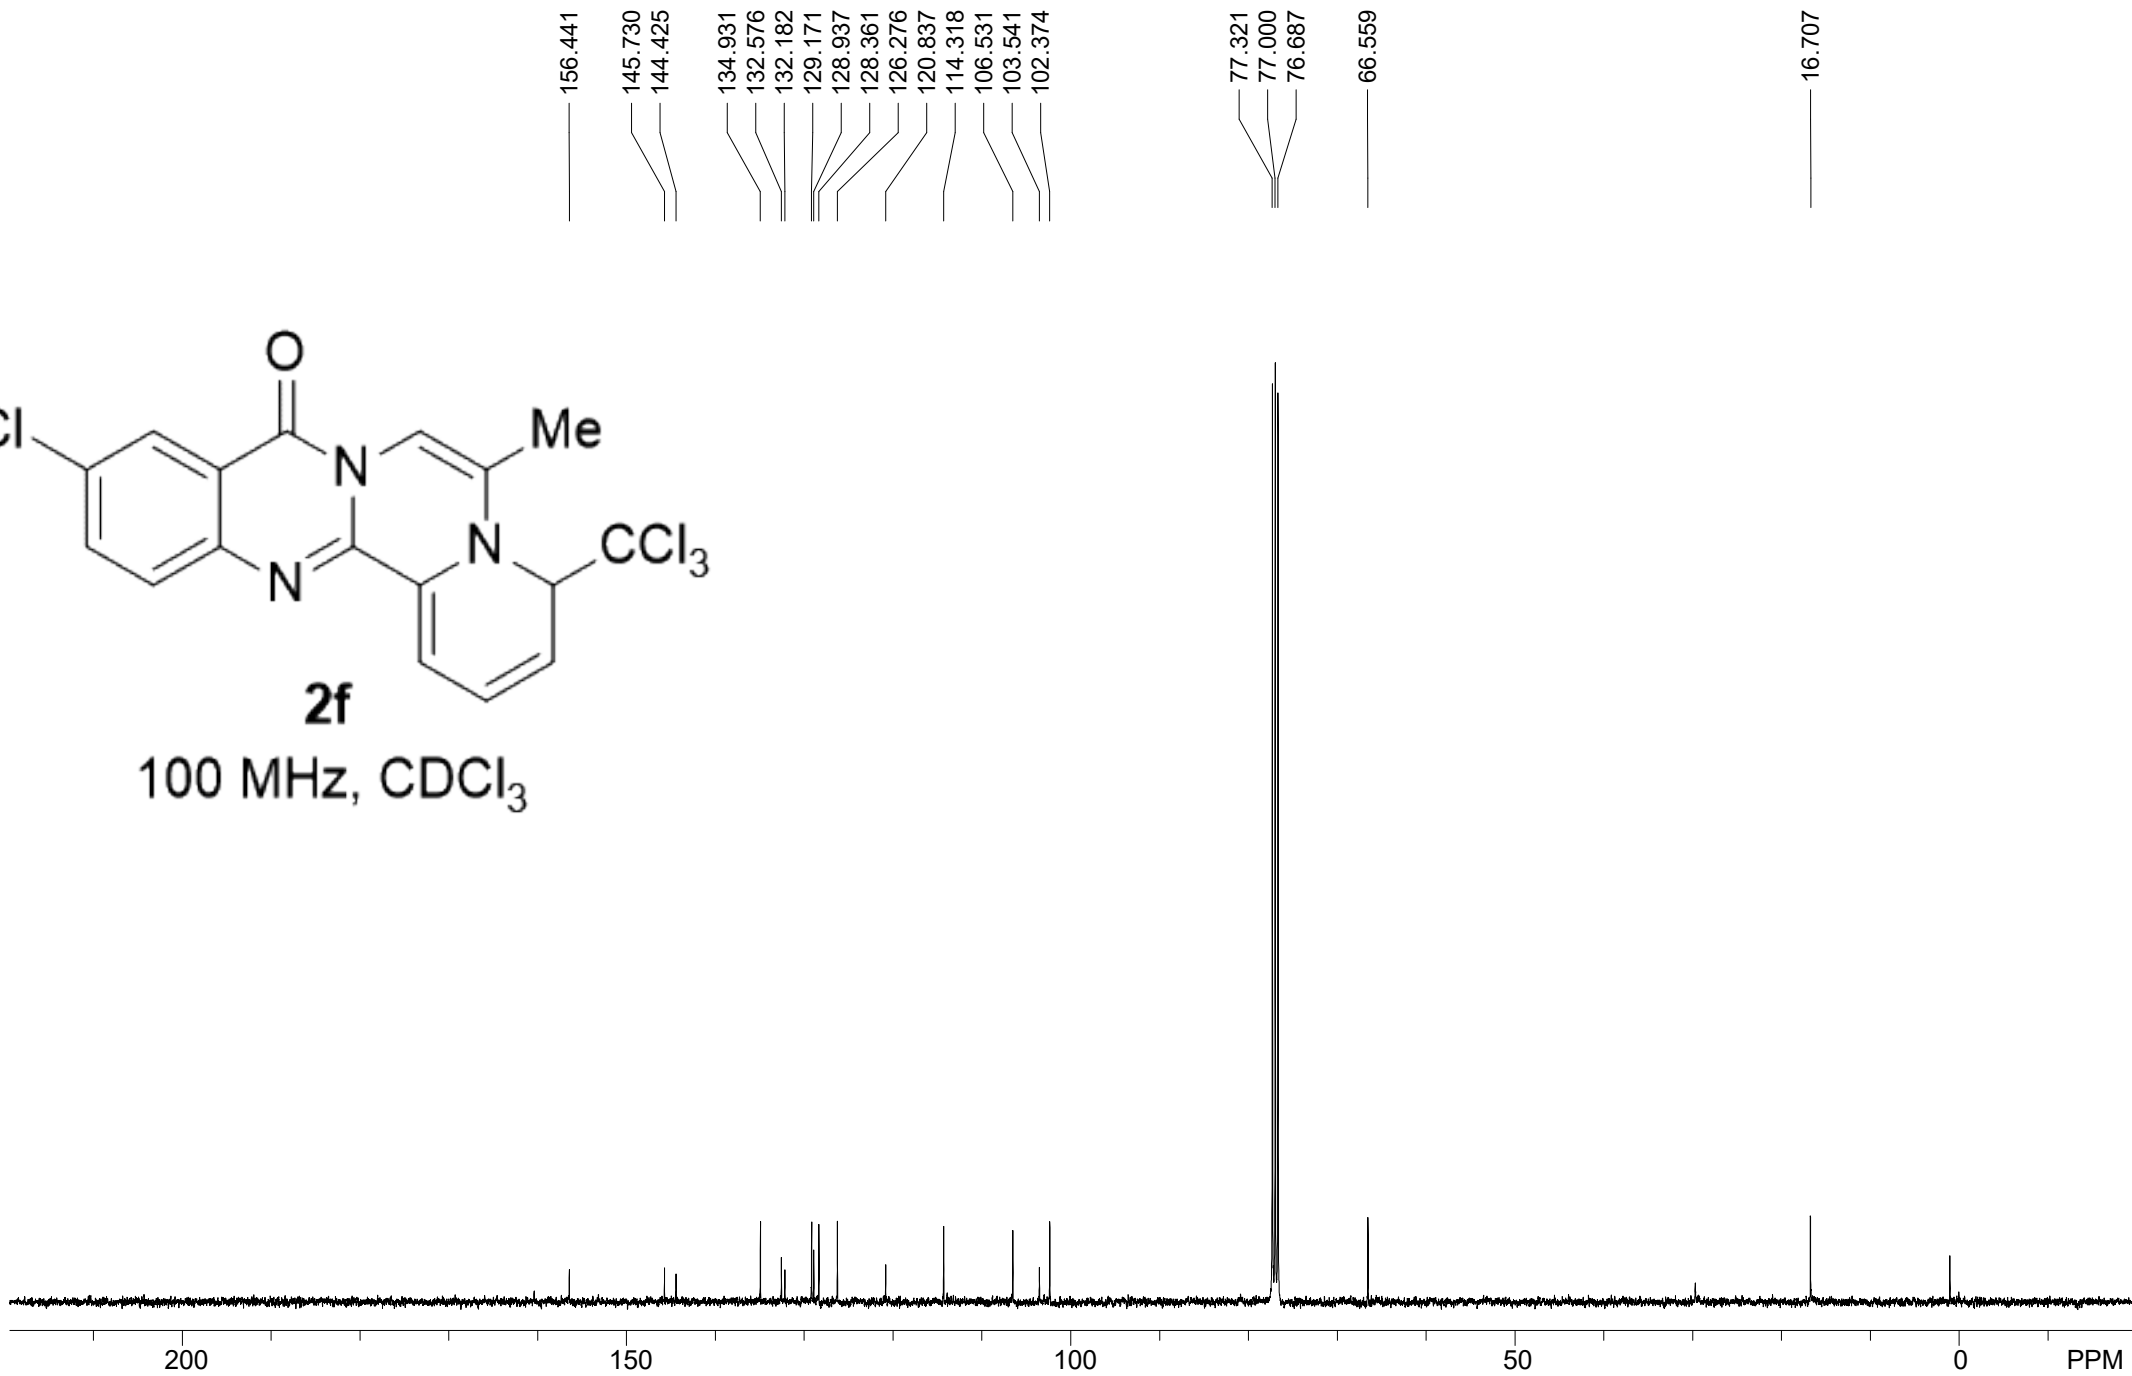



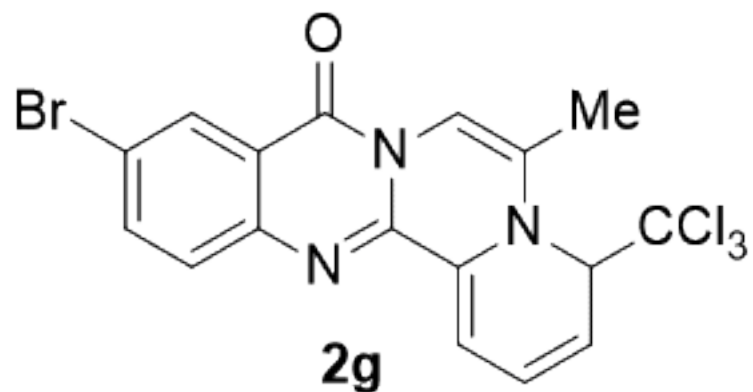

400 MHz, CDCl<sub>3</sub>

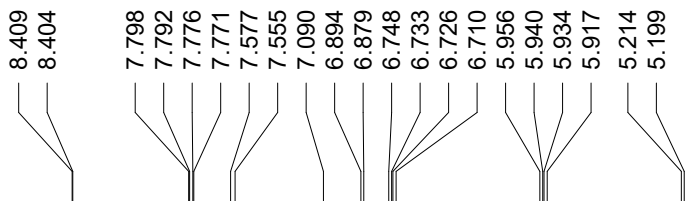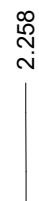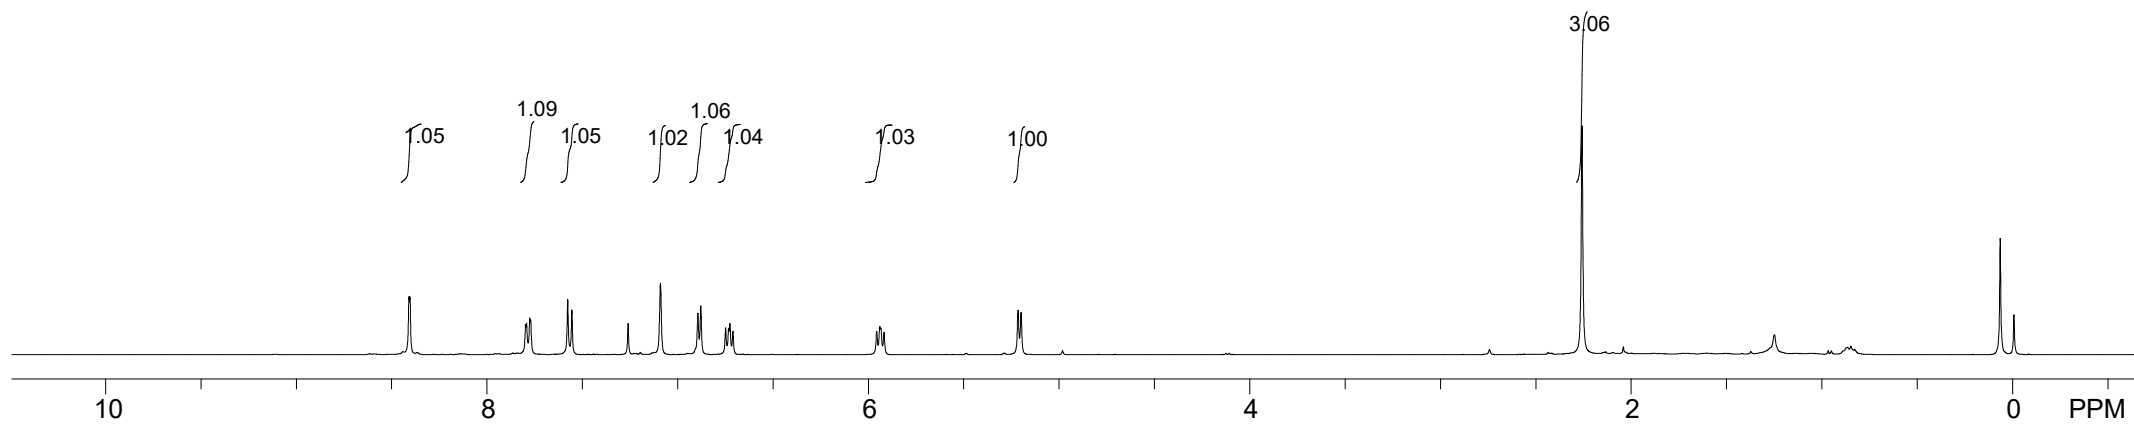

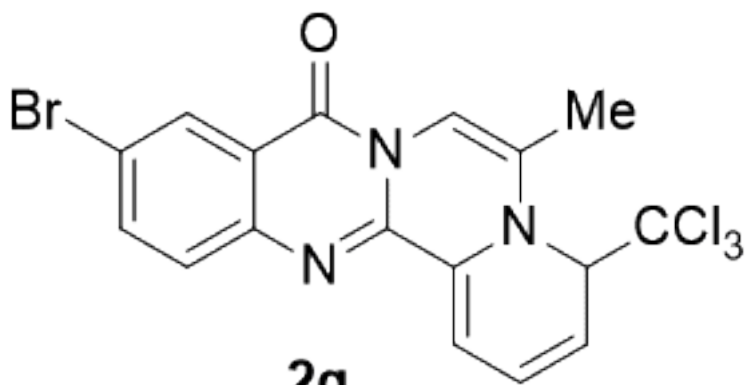

**2g**

100 MHz, CDCl<sub>3</sub>

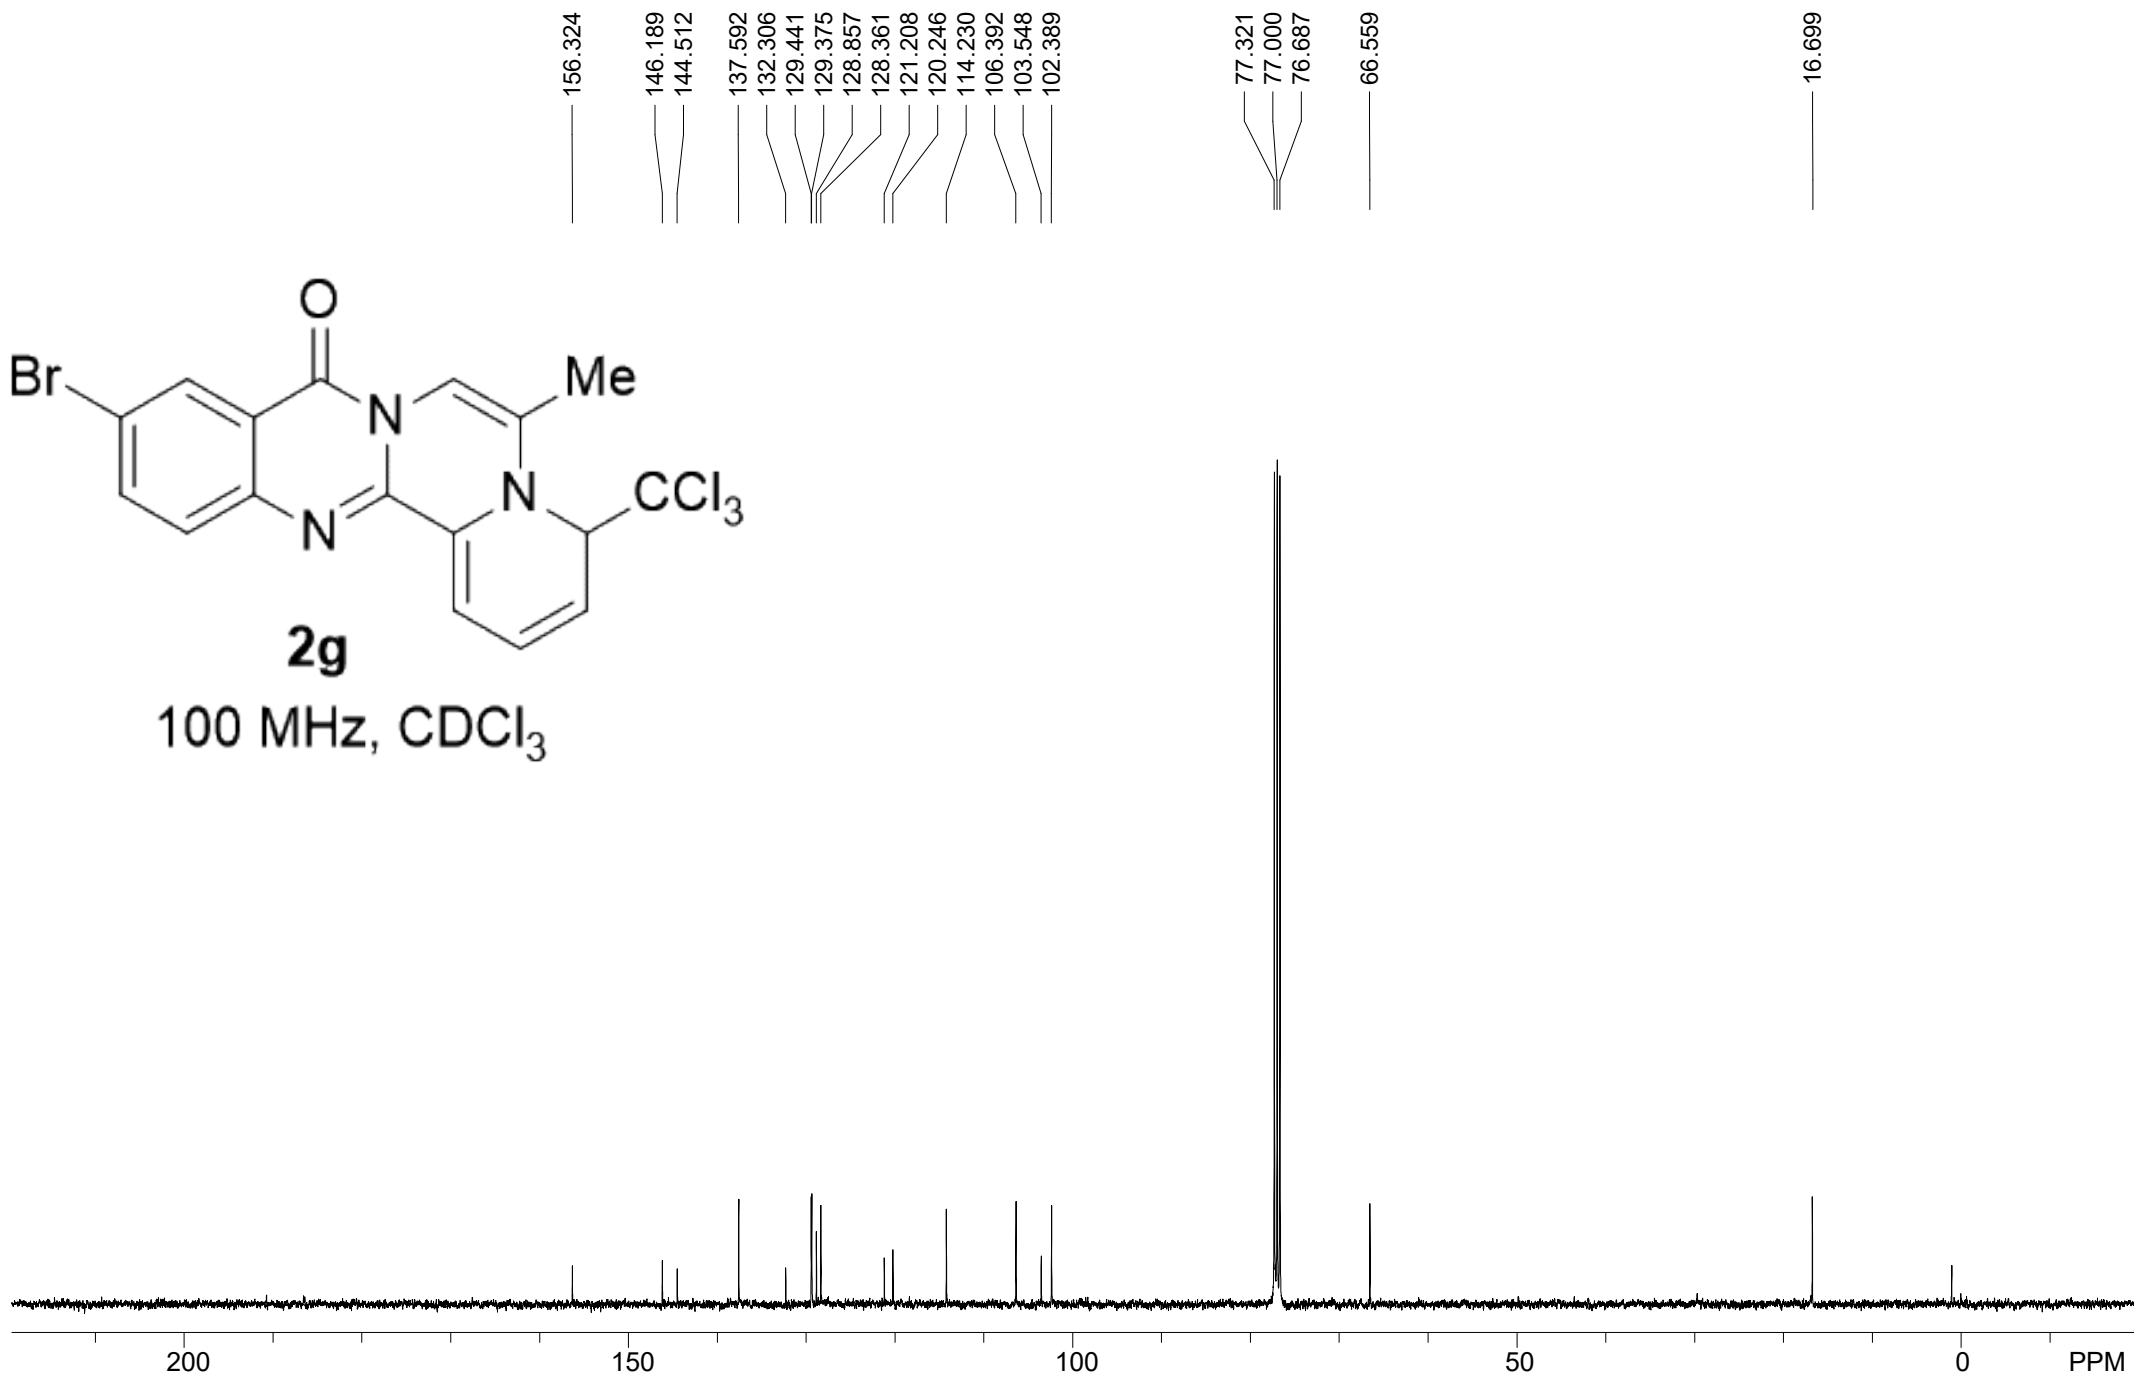

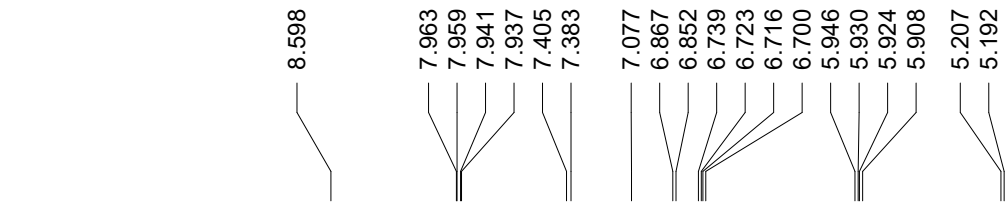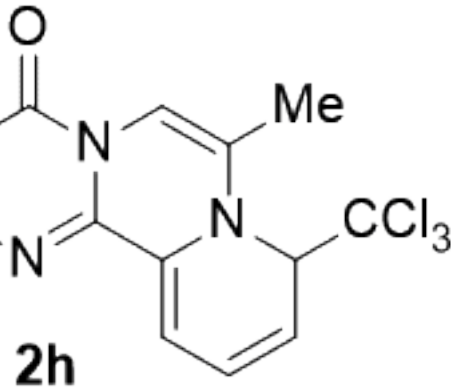

400 MHz, CDCl<sub>3</sub>

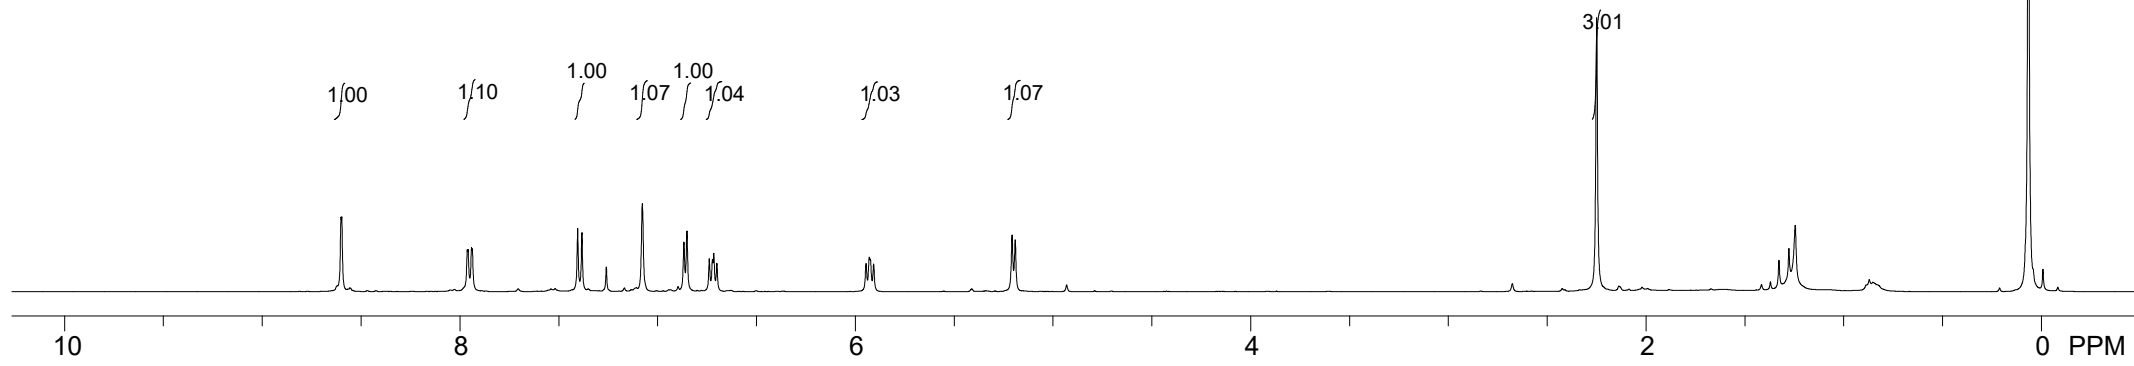

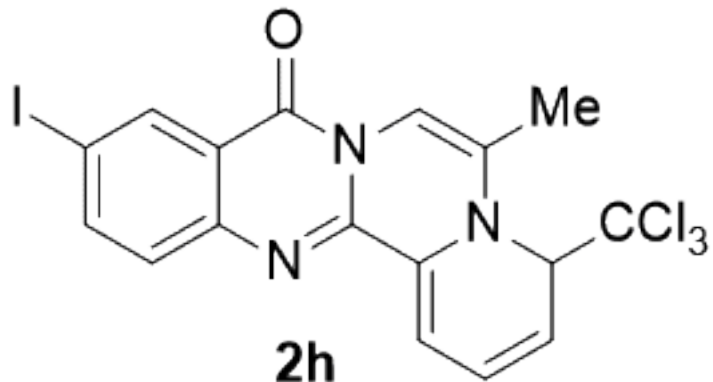

100 MHz, CDCl<sub>3</sub>

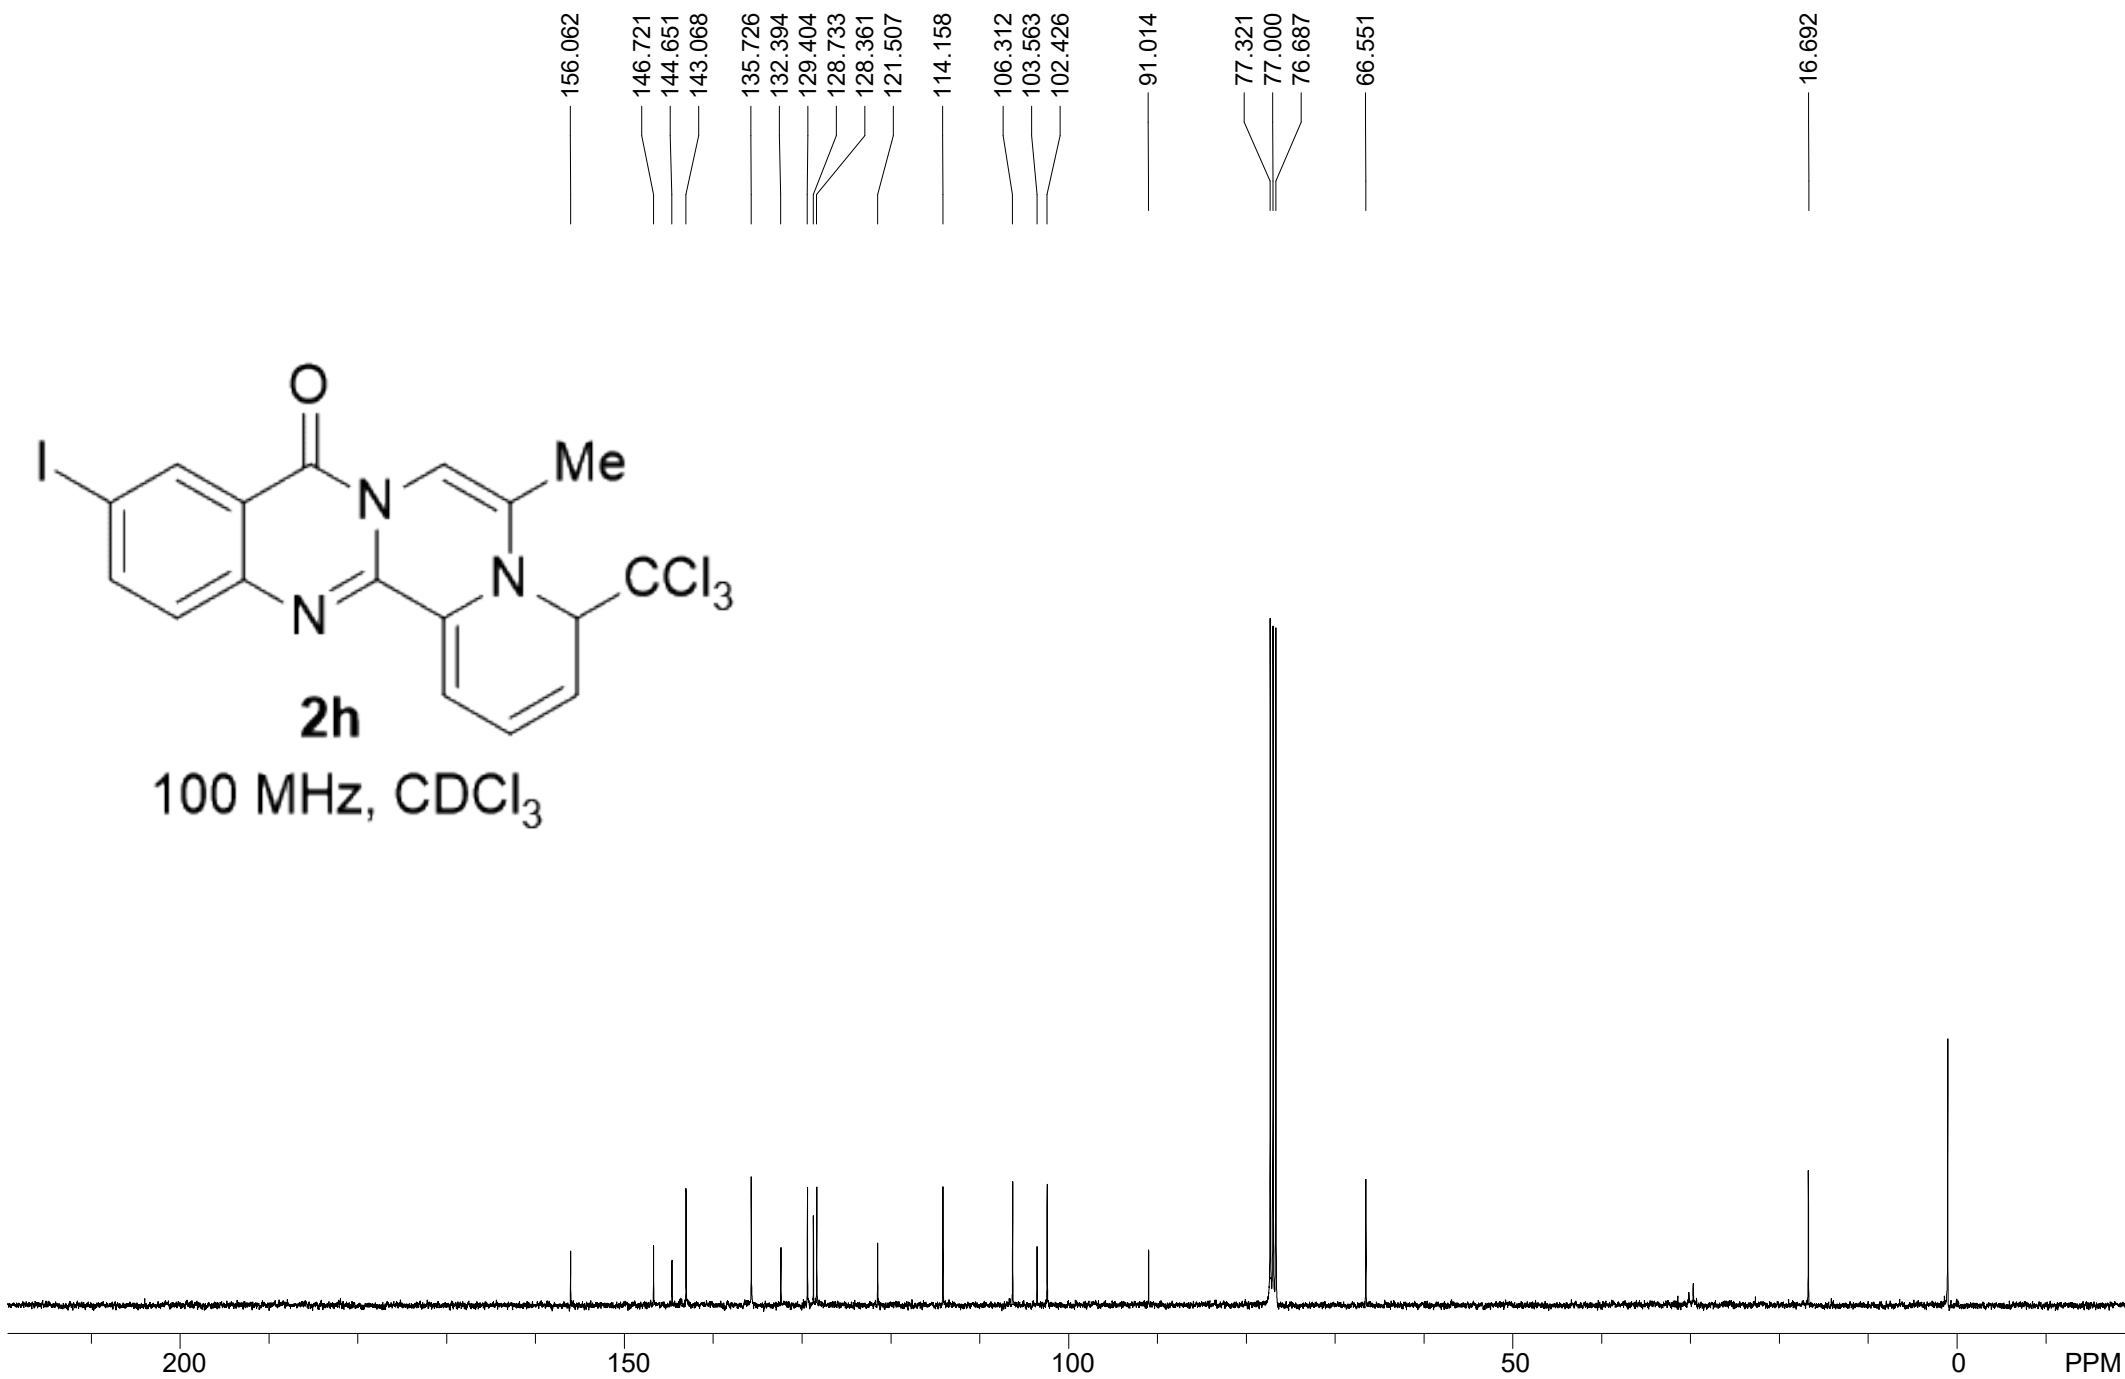

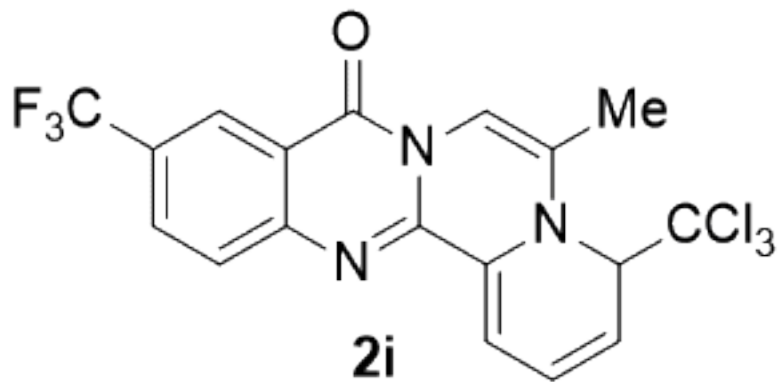

400 MHz, CDCl<sub>3</sub>

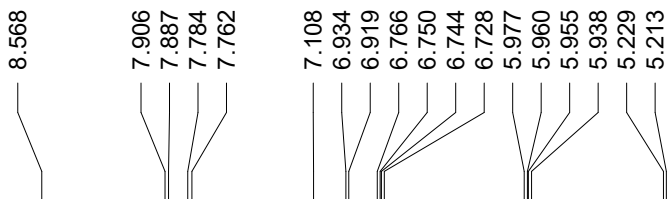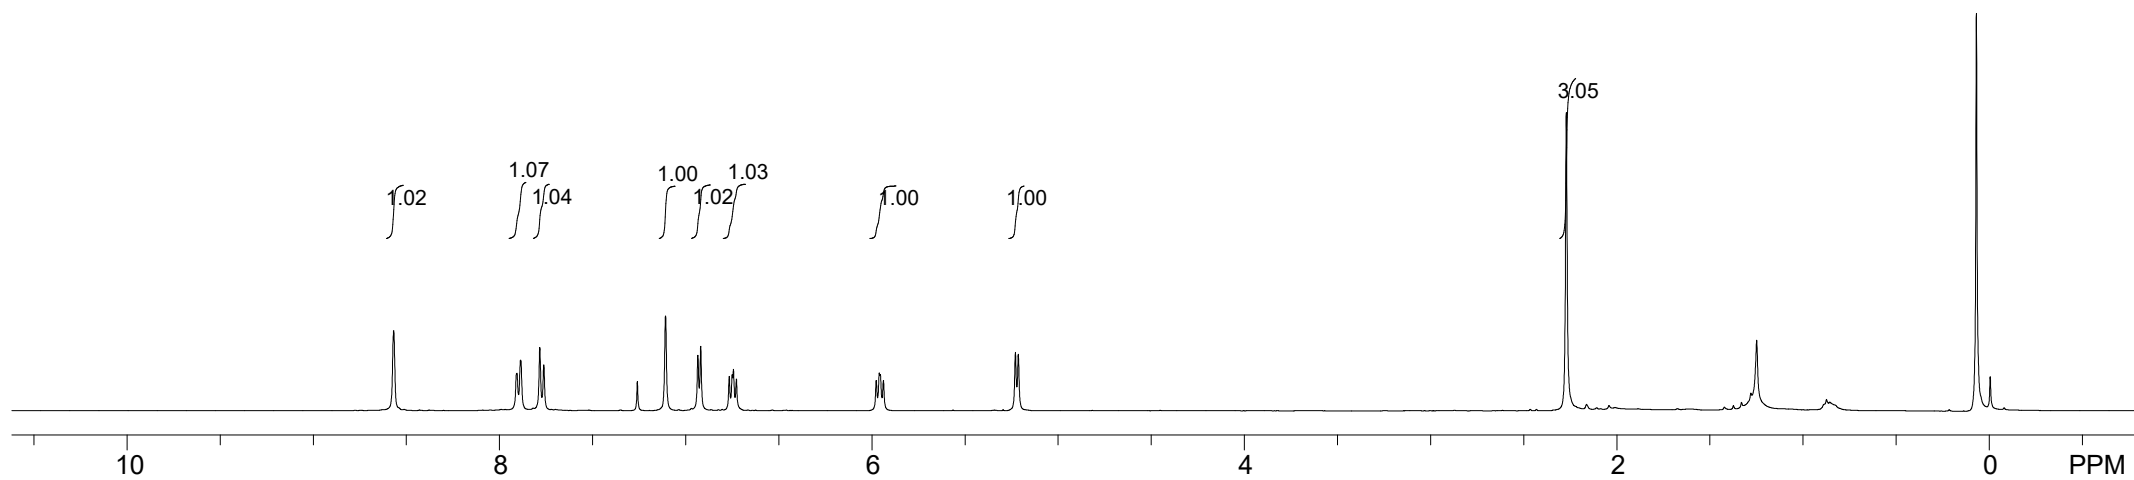

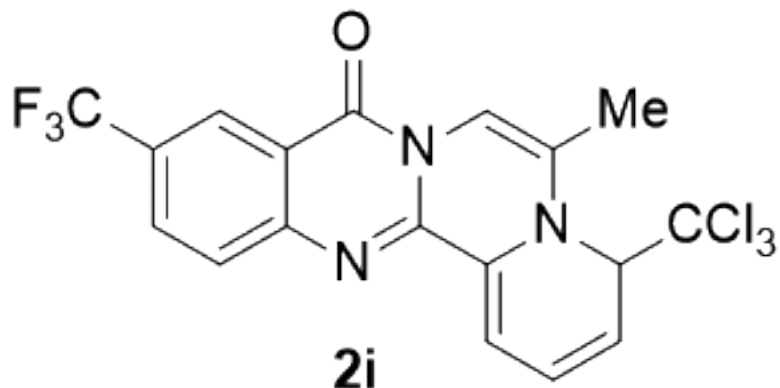

100 MHz, CDCl<sub>3</sub>

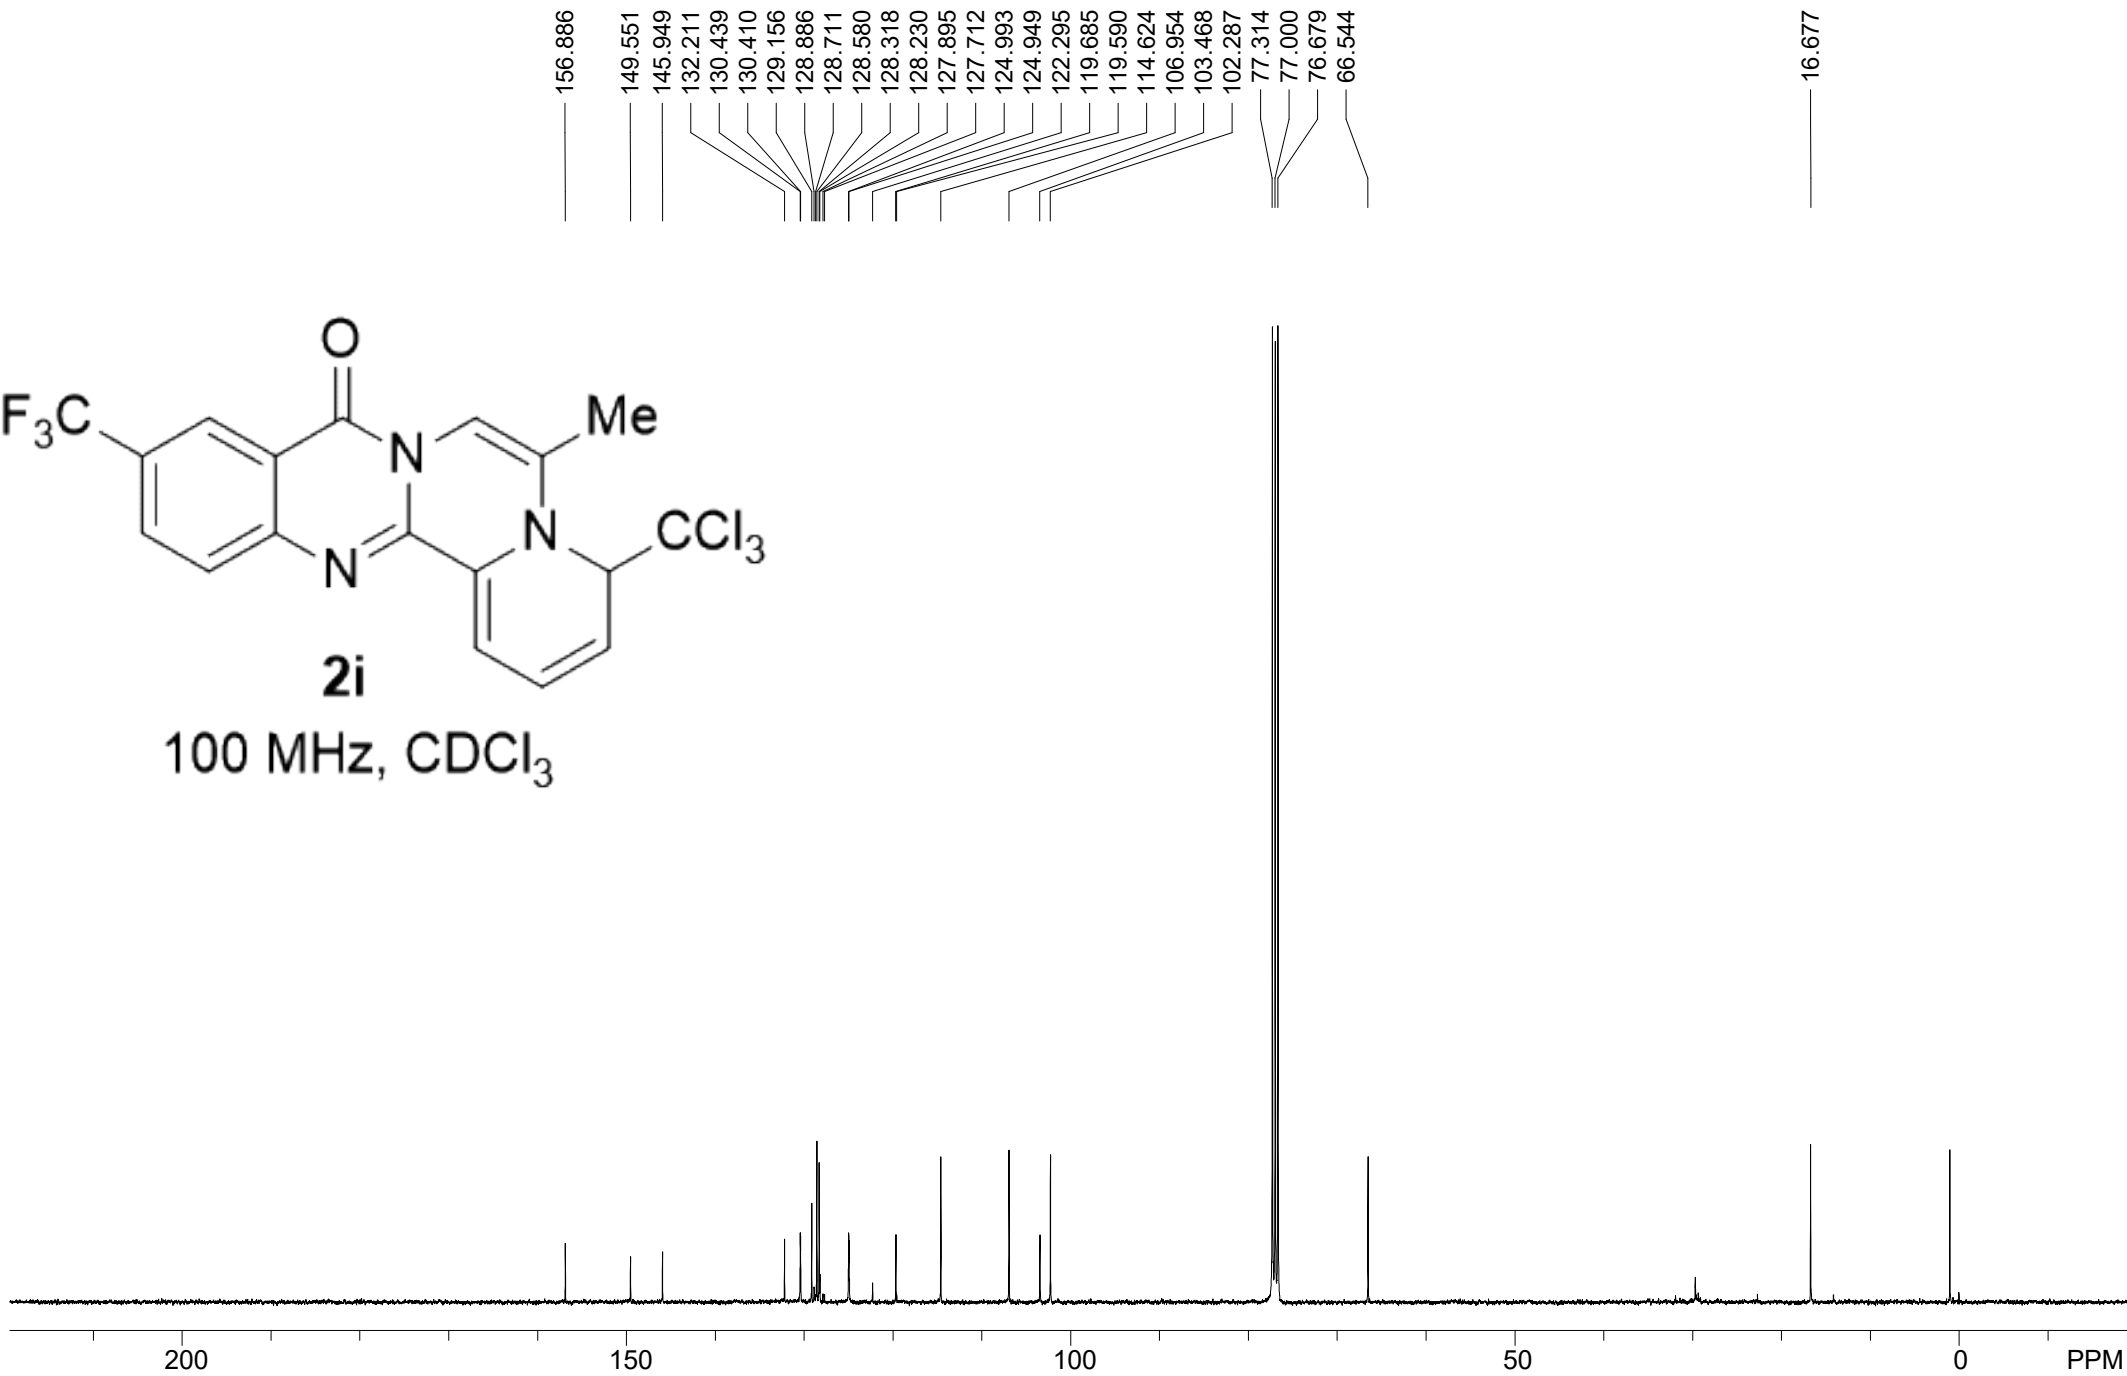

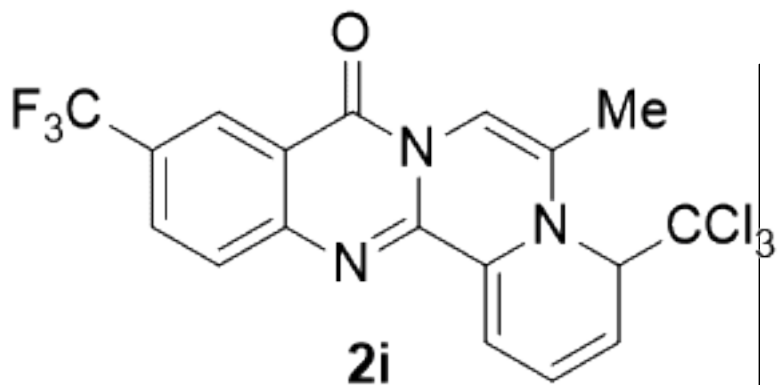

376 MHz, CDCl<sub>3</sub>

62.370

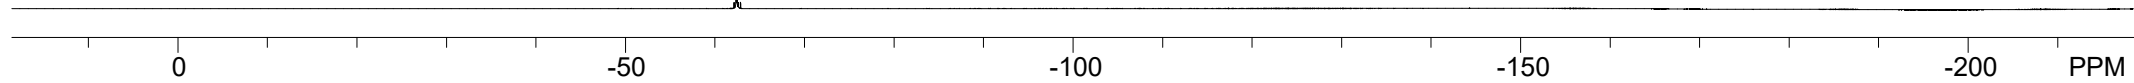

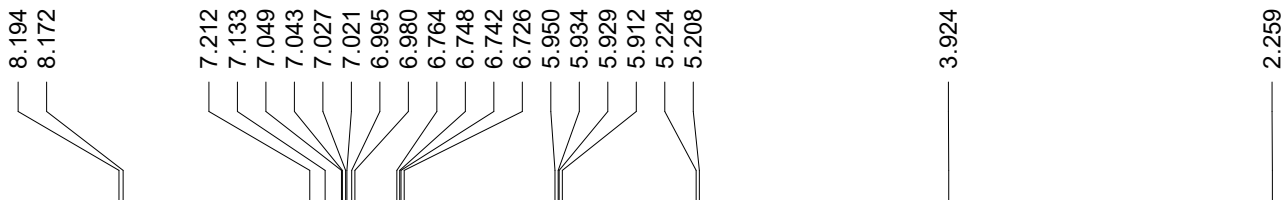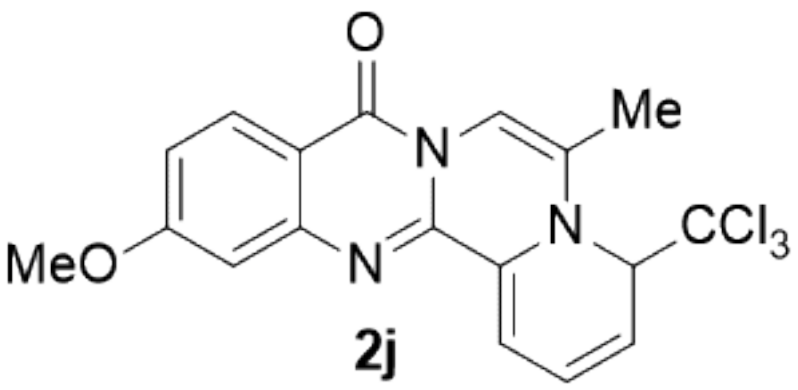

400 MHz, CDCl<sub>3</sub>

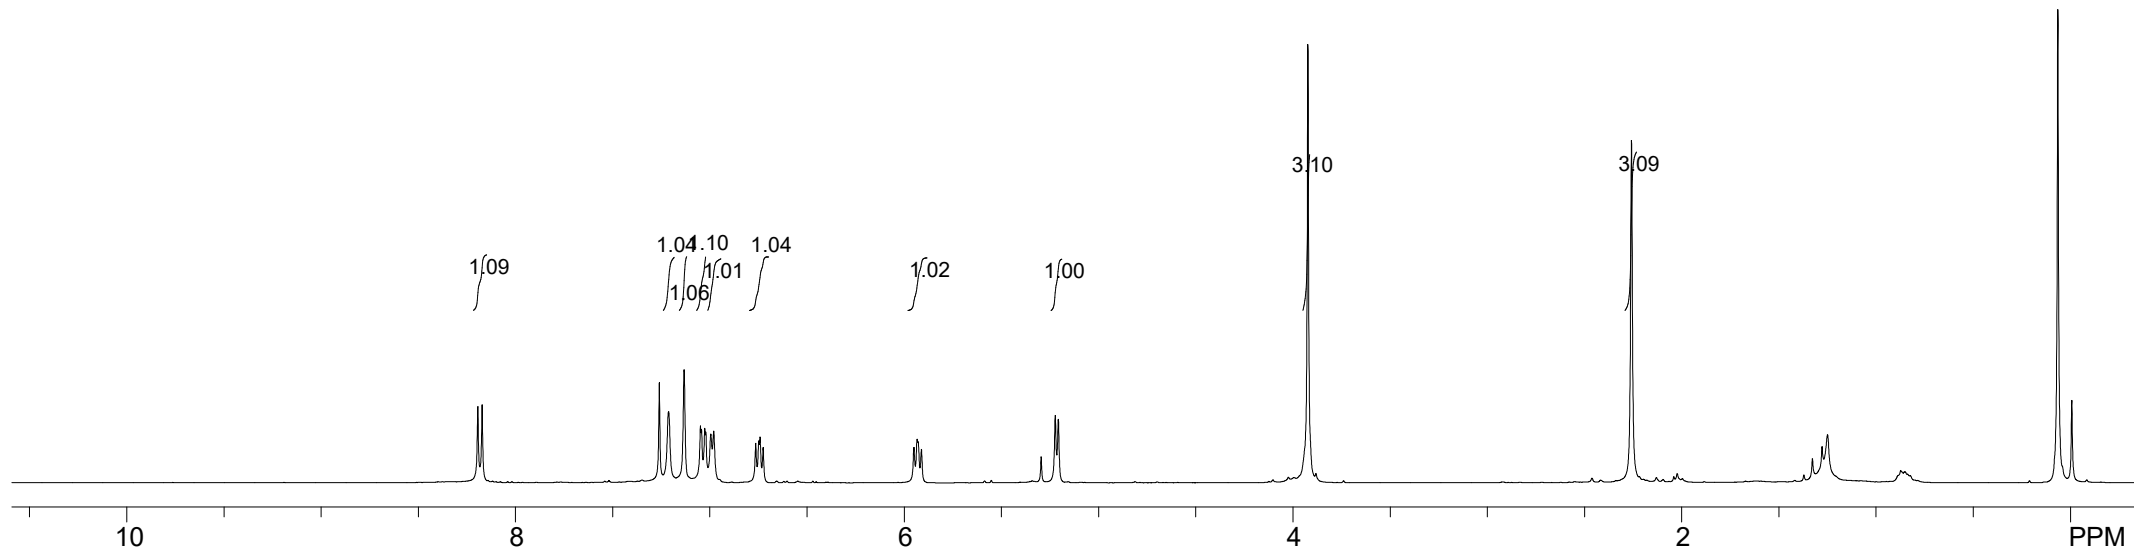



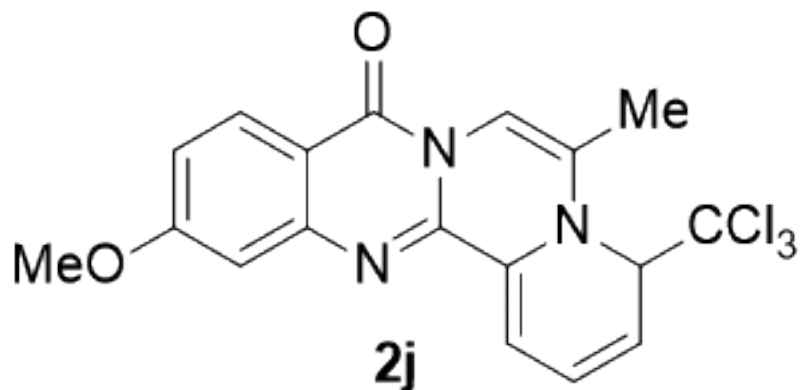

100 MHz, CDCl<sub>3</sub>

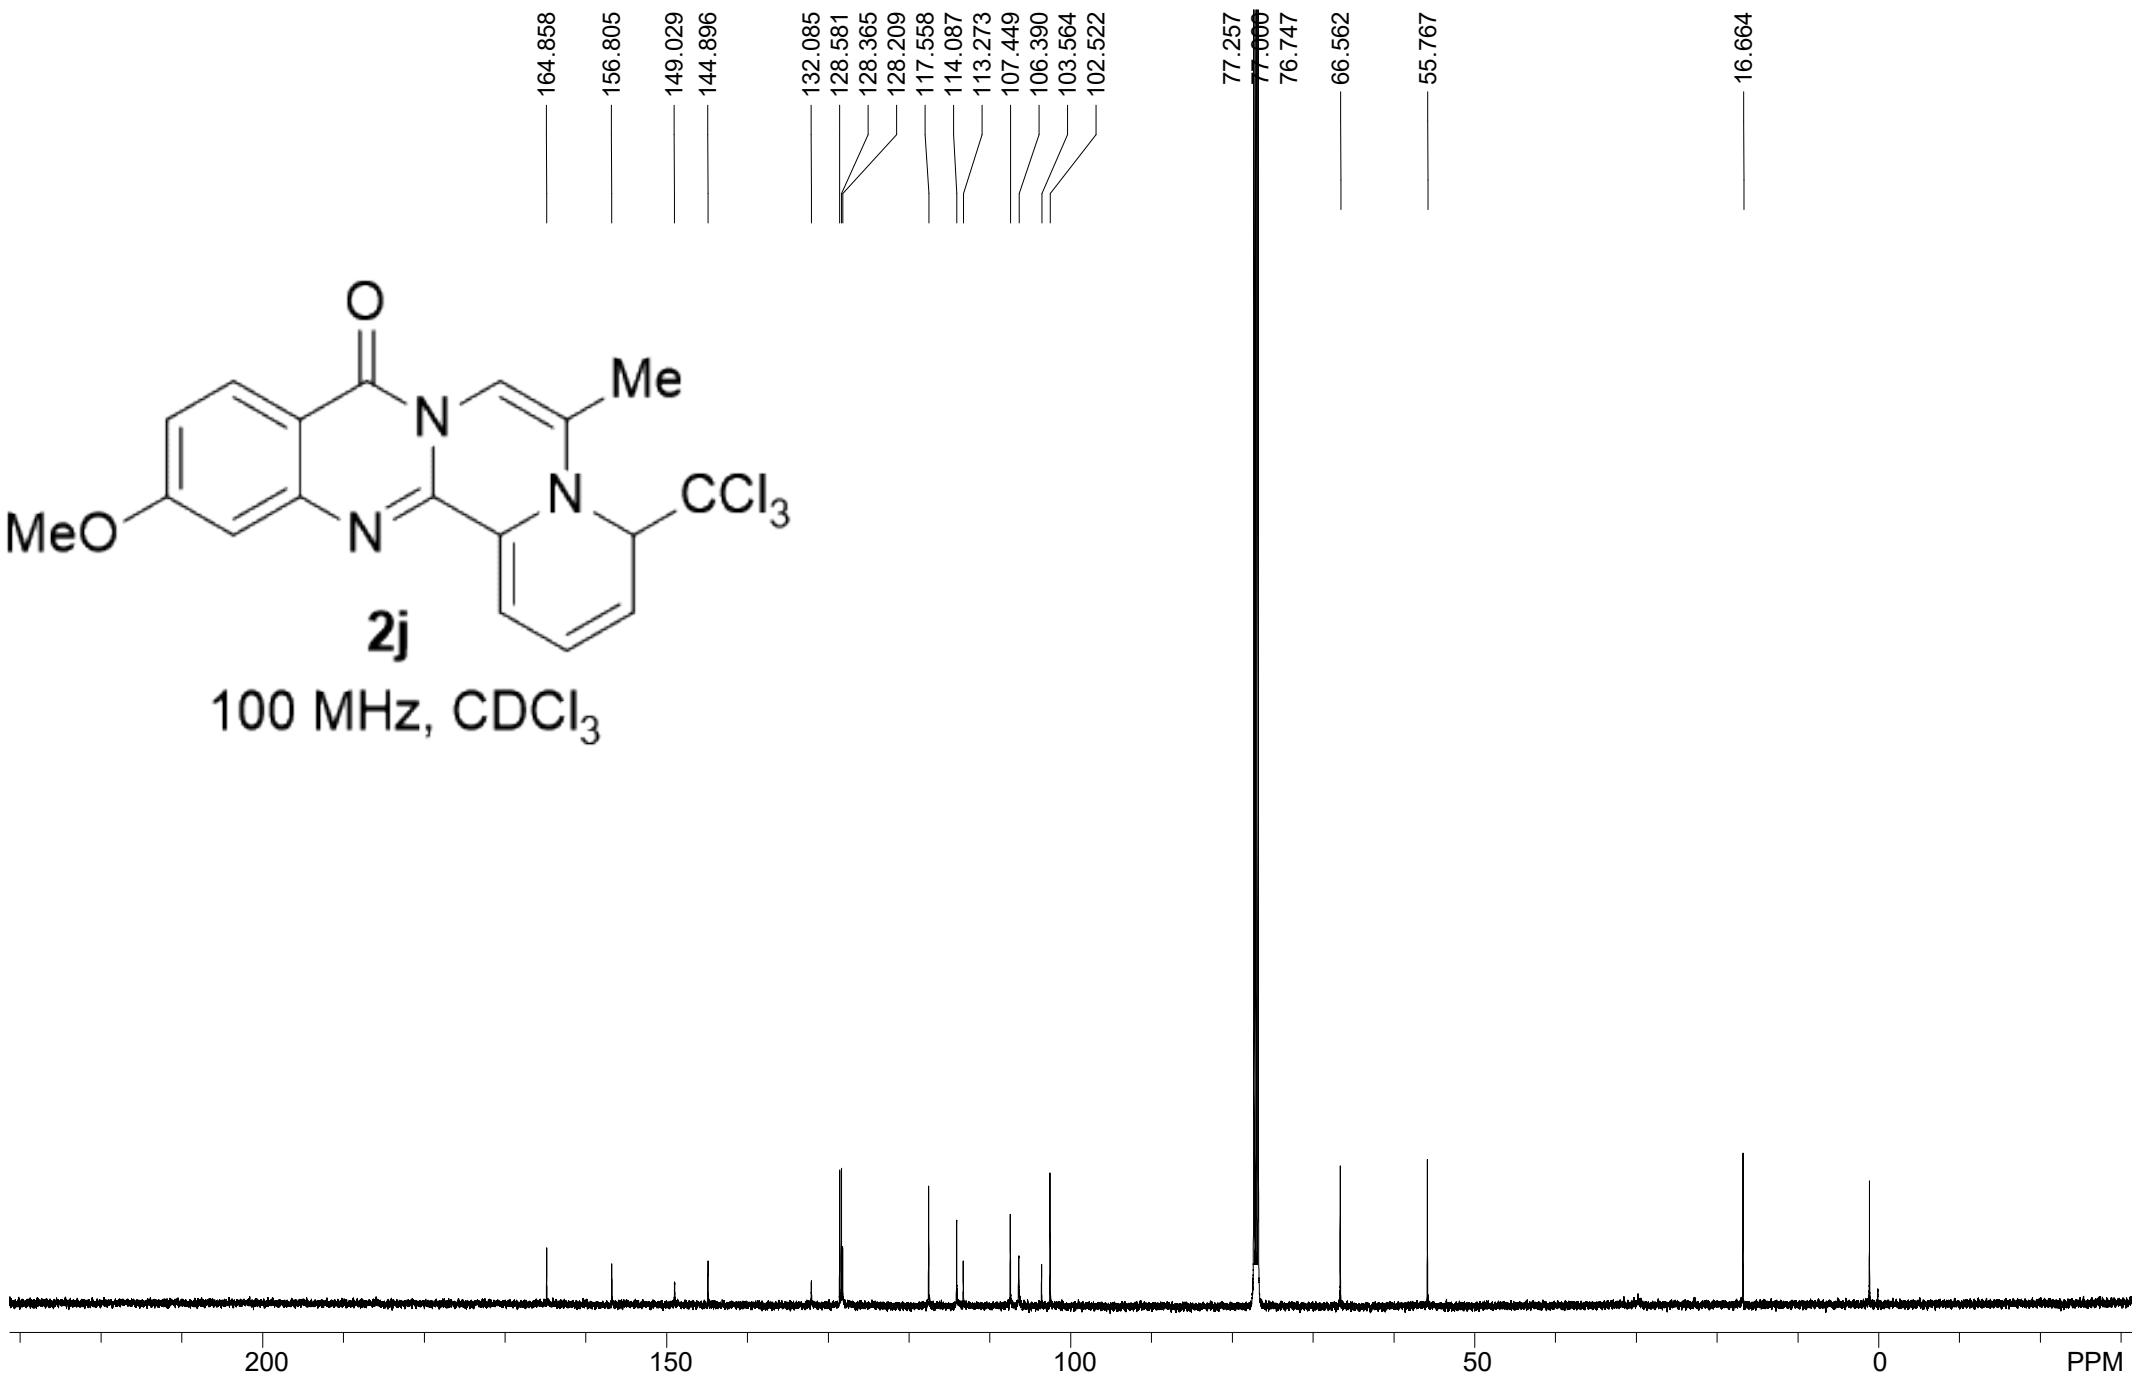

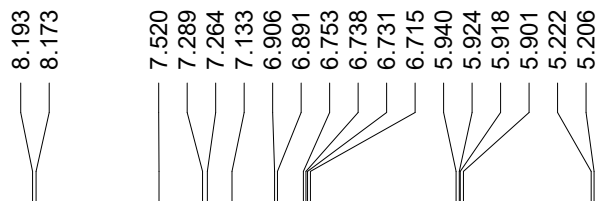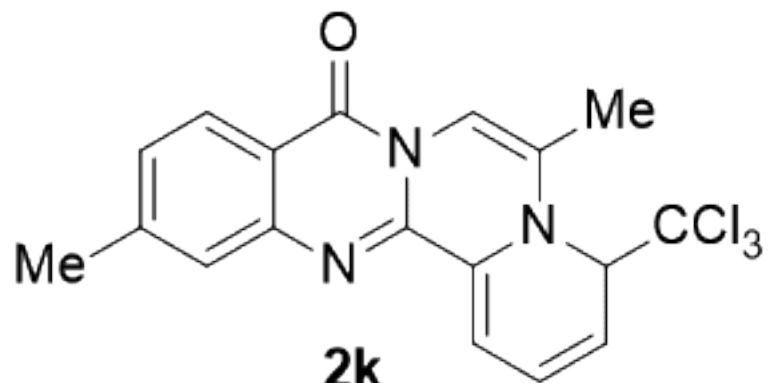

400 MHz, CDCl<sub>3</sub>

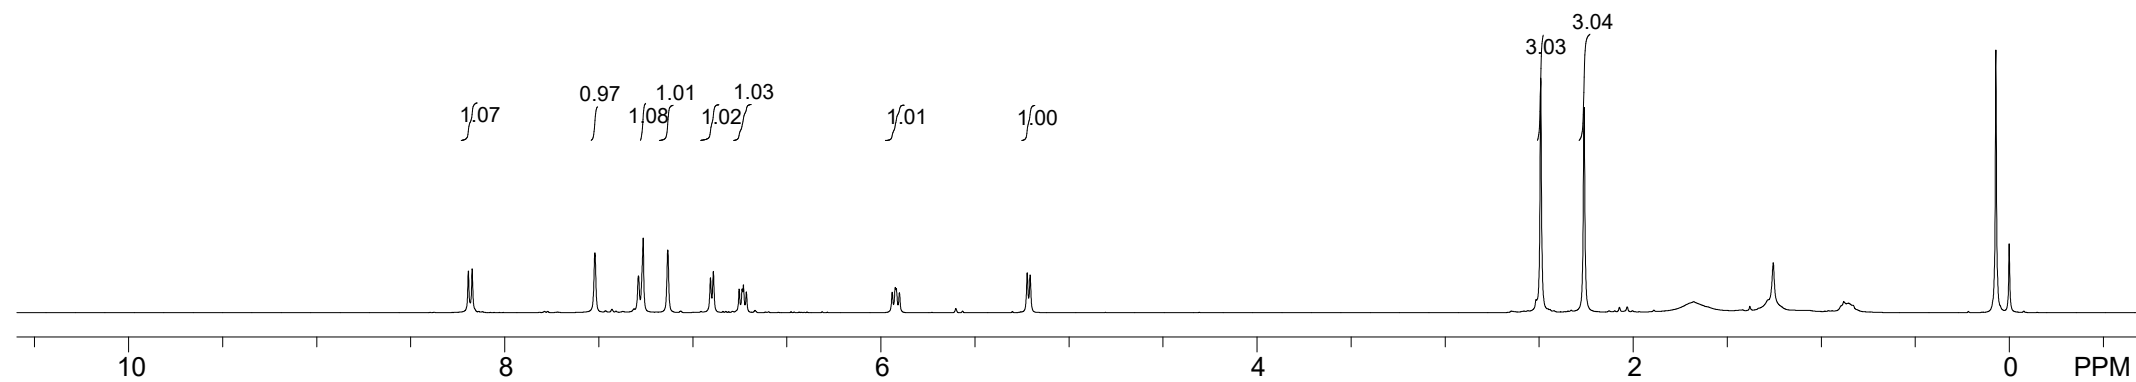

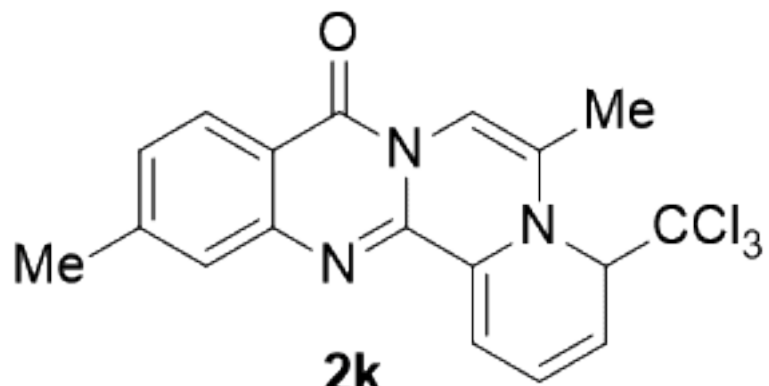

100 MHz, CDCl<sub>3</sub>

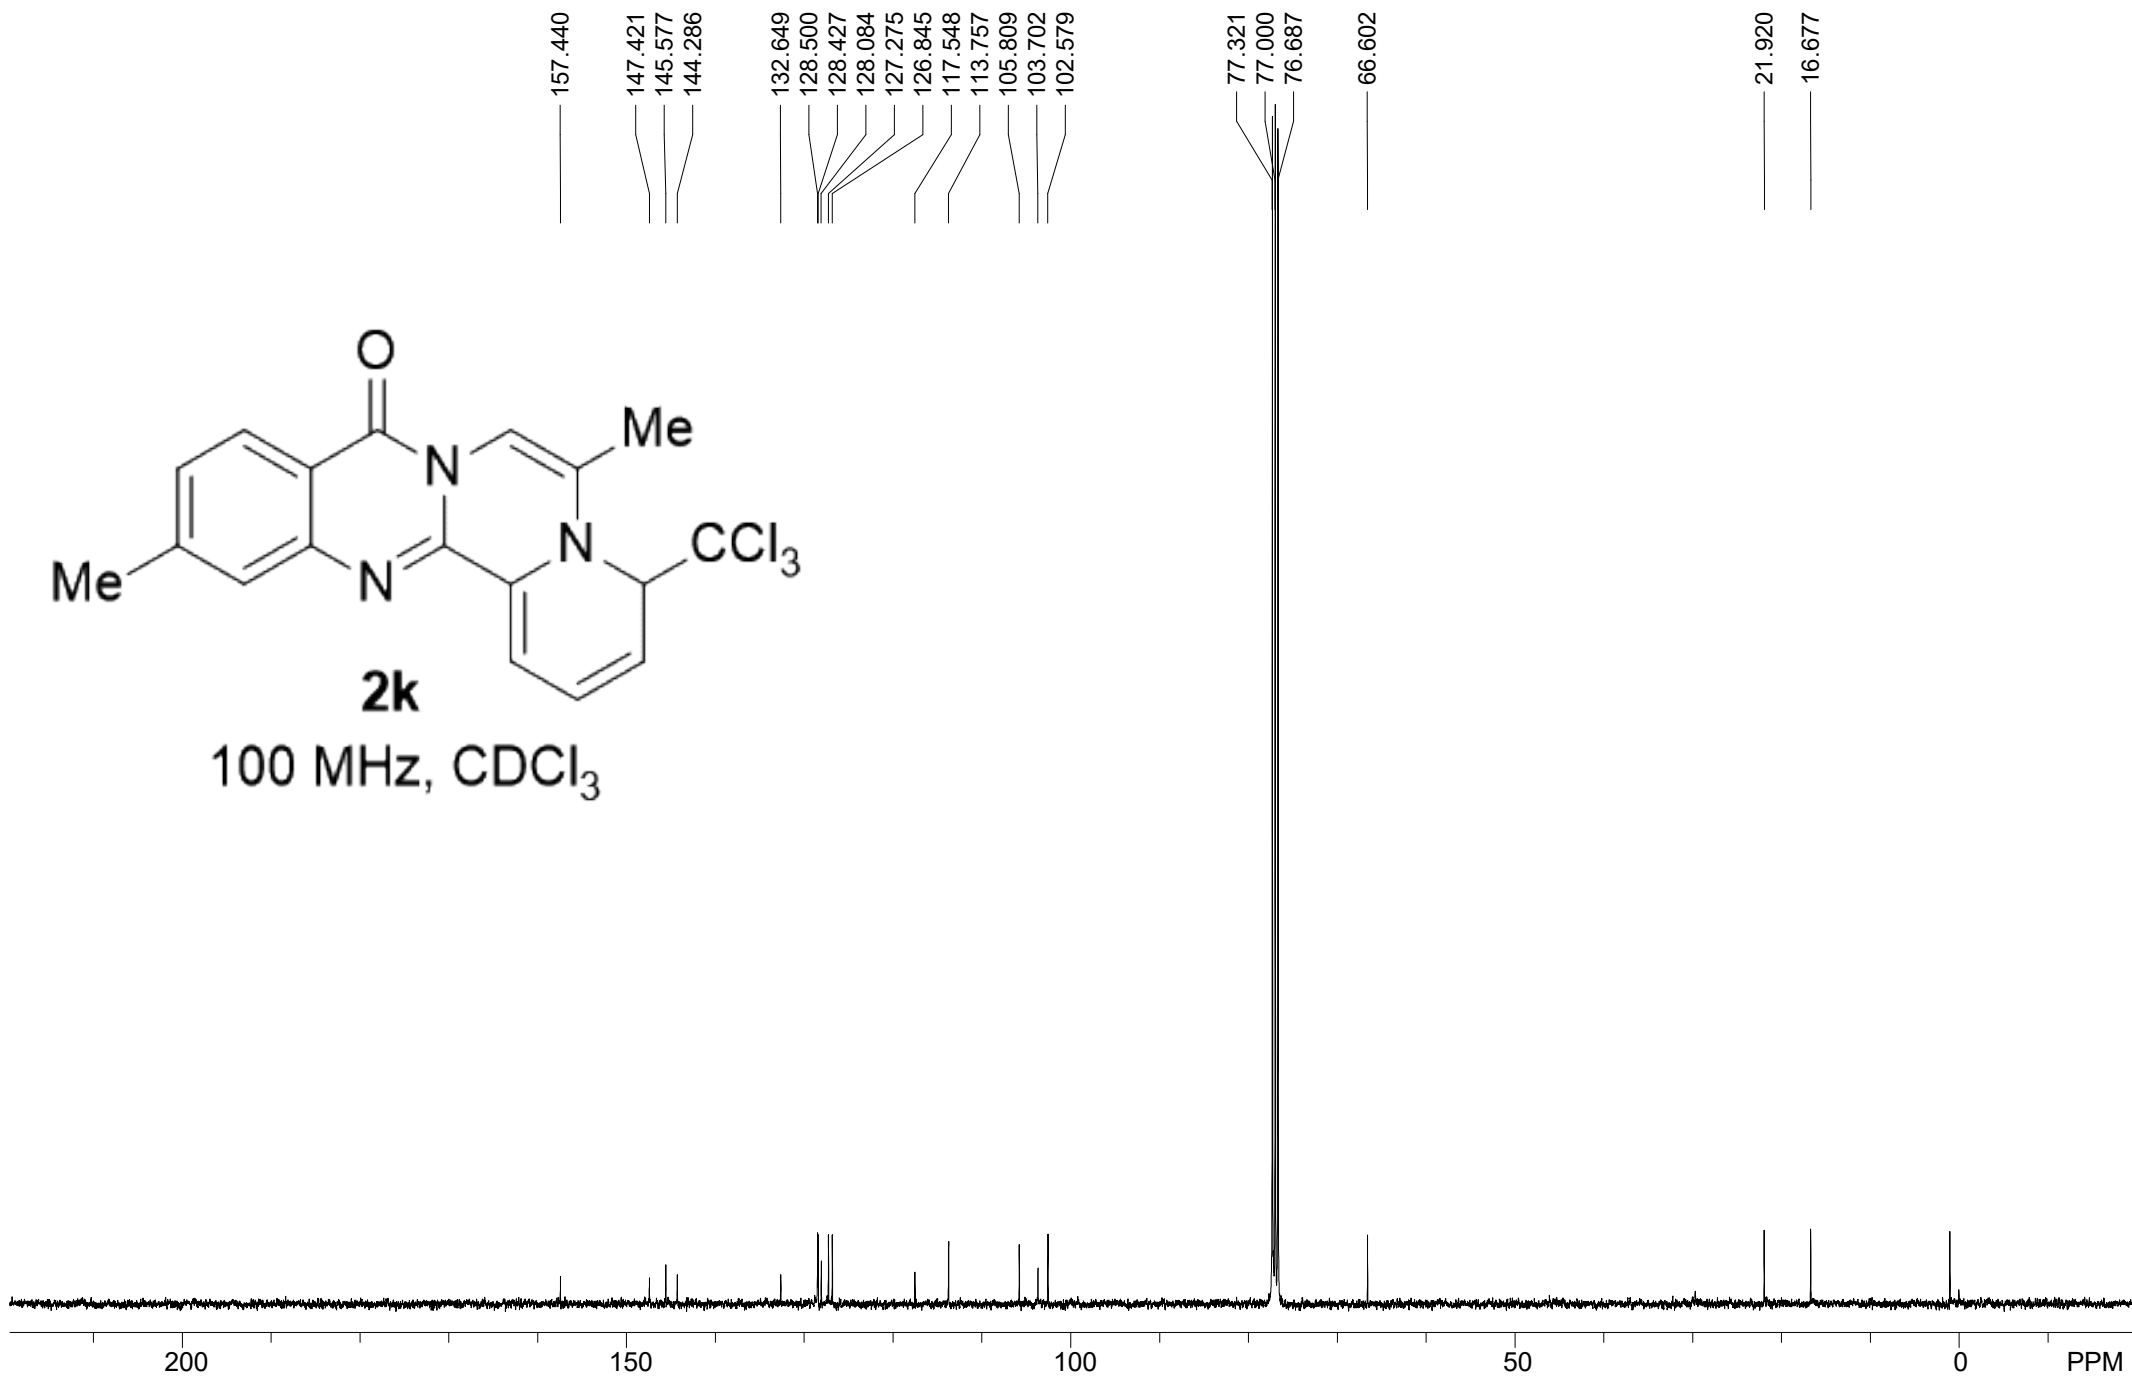

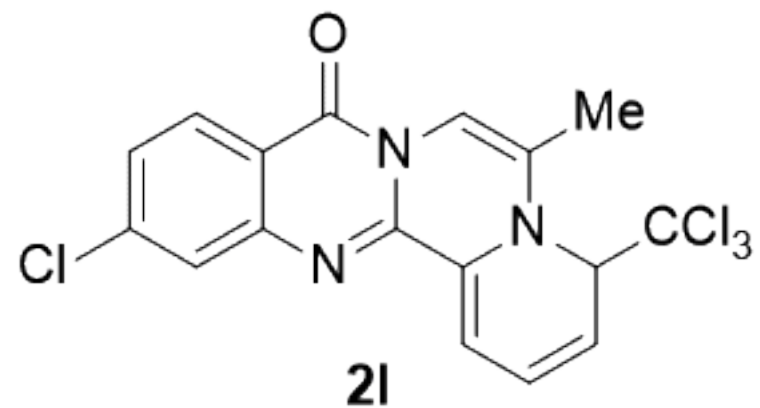

**21**  
400 MHz, CDCl<sub>3</sub>

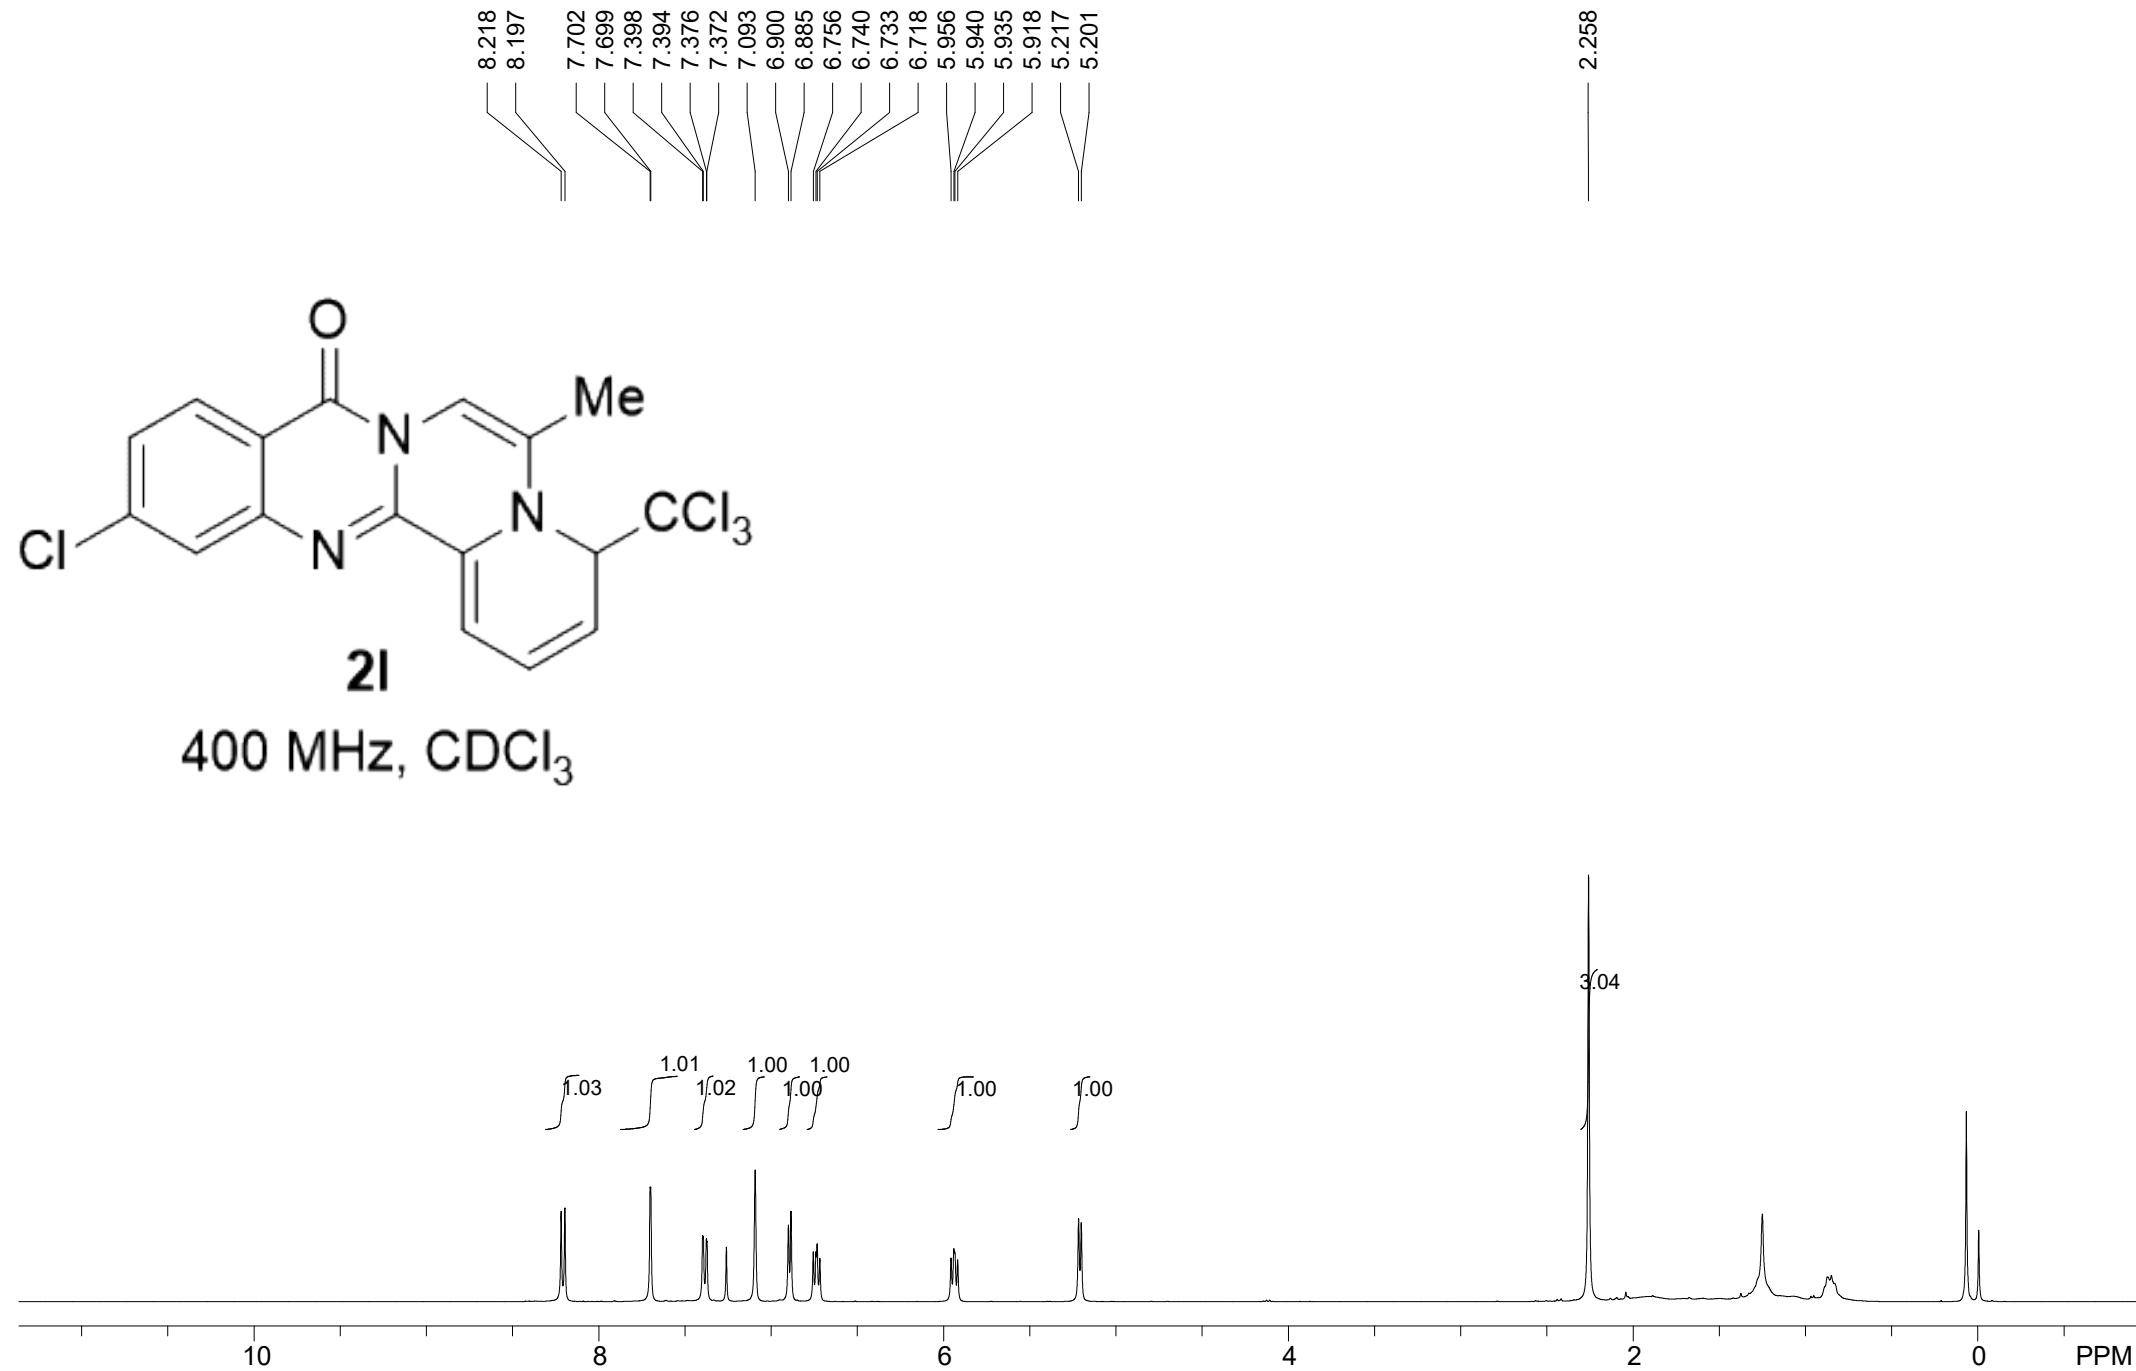

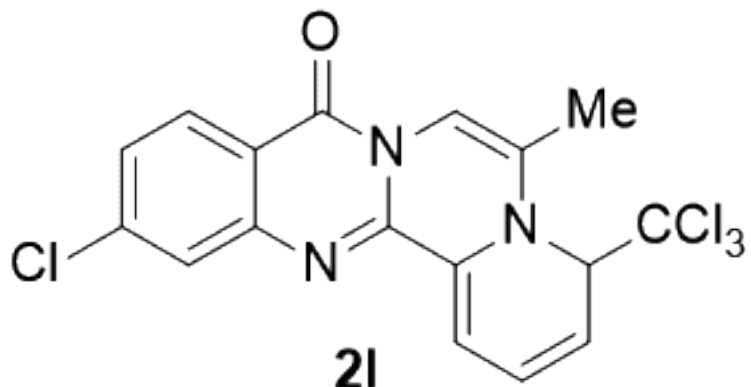

100 MHz, CDCl<sub>3</sub>

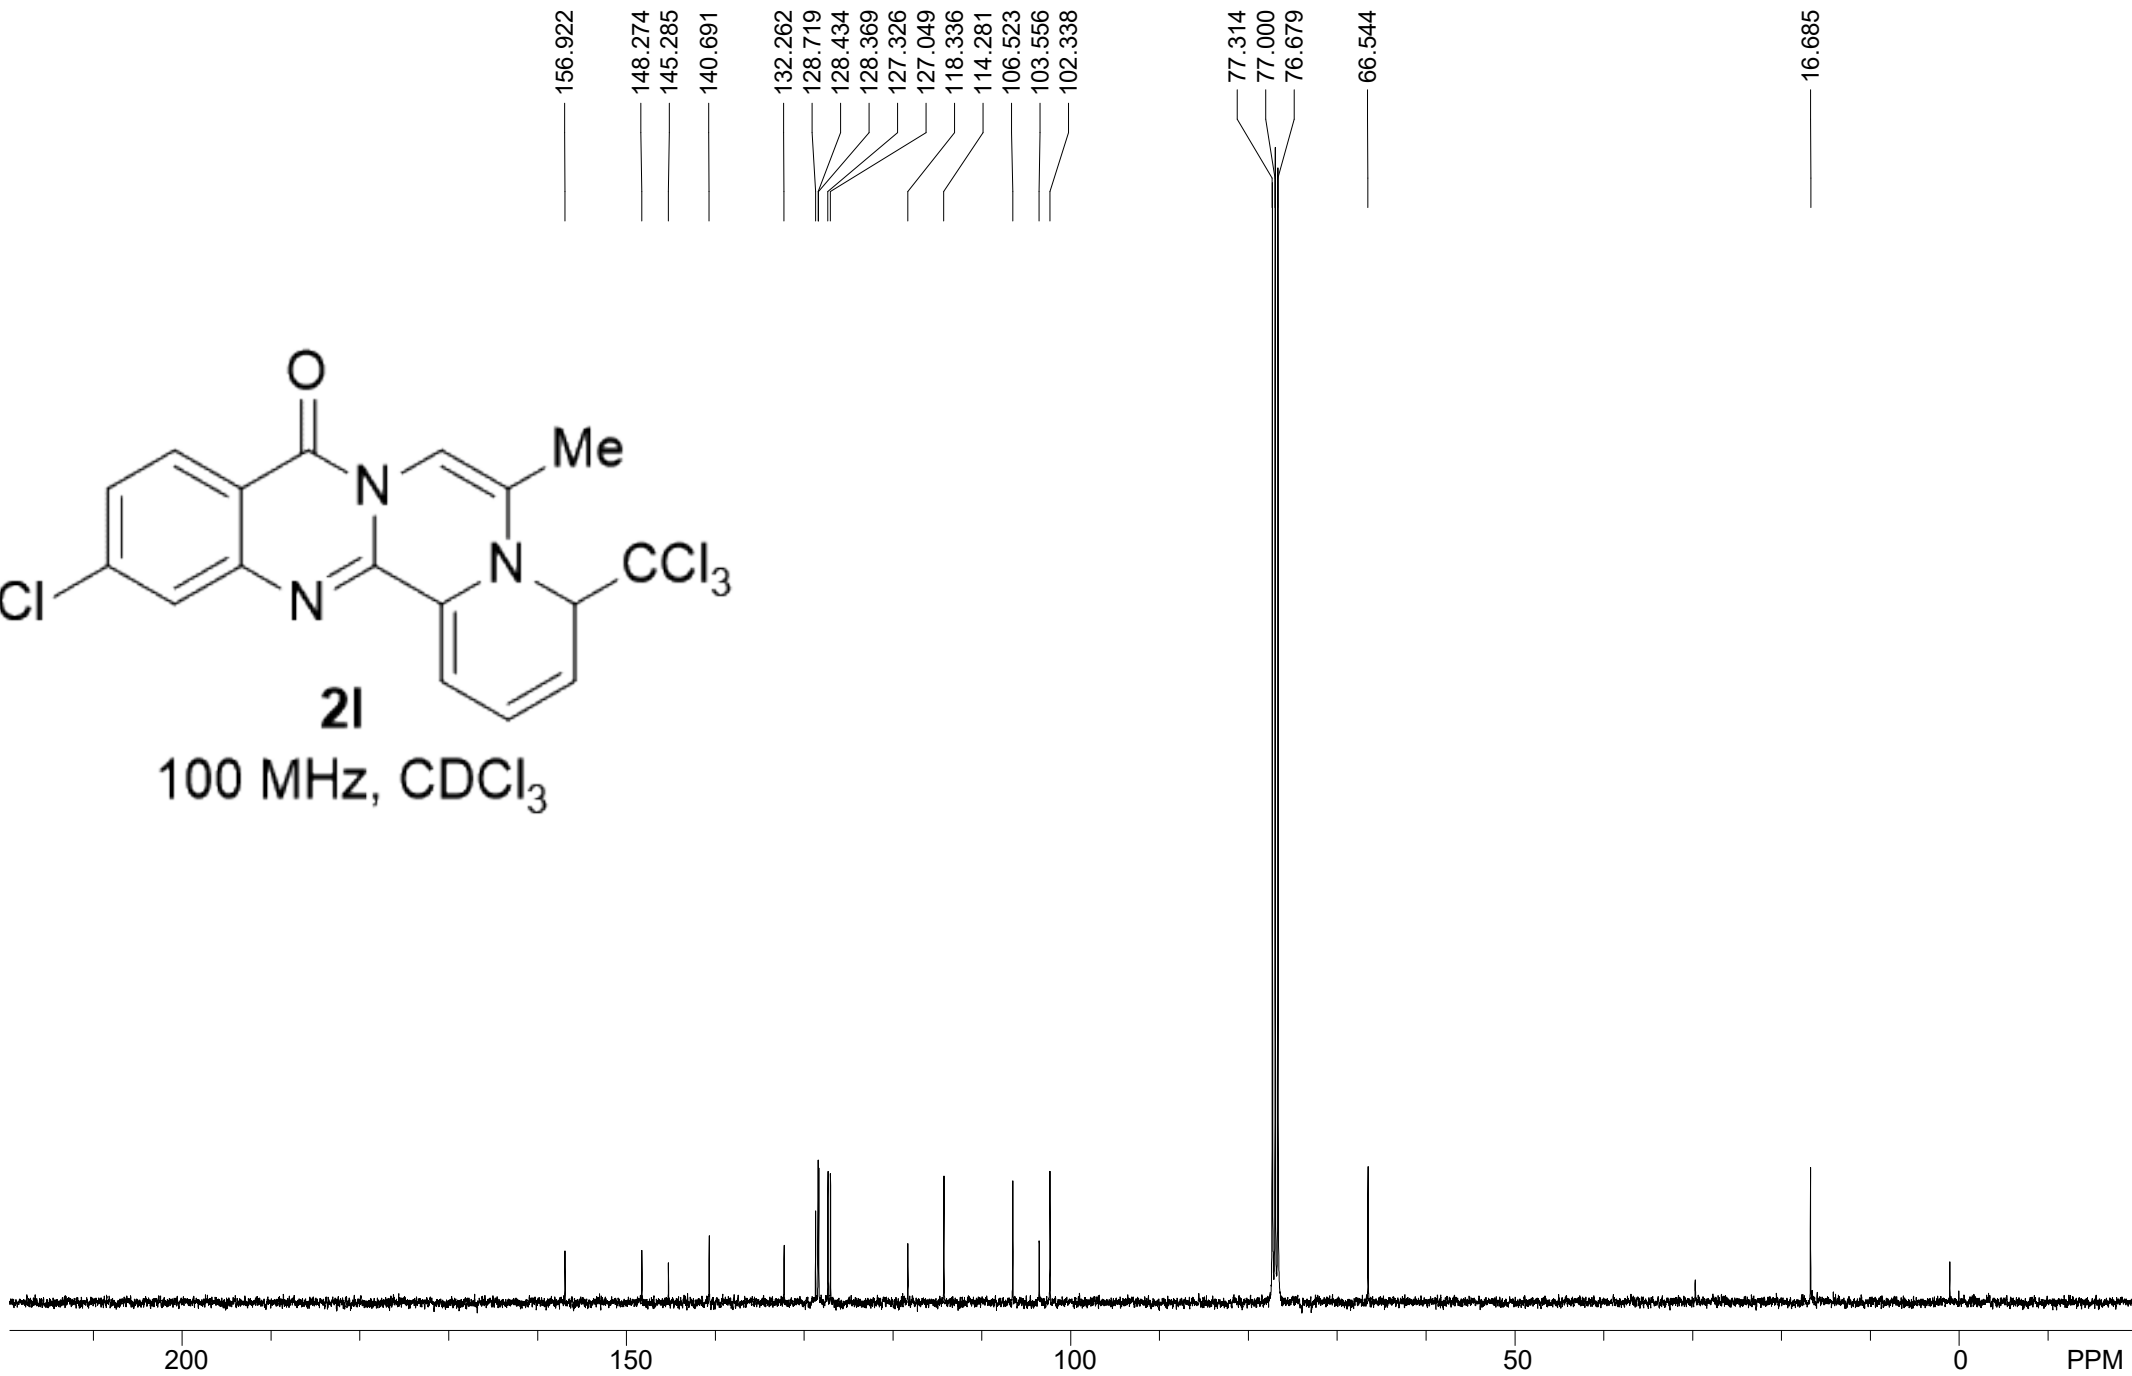

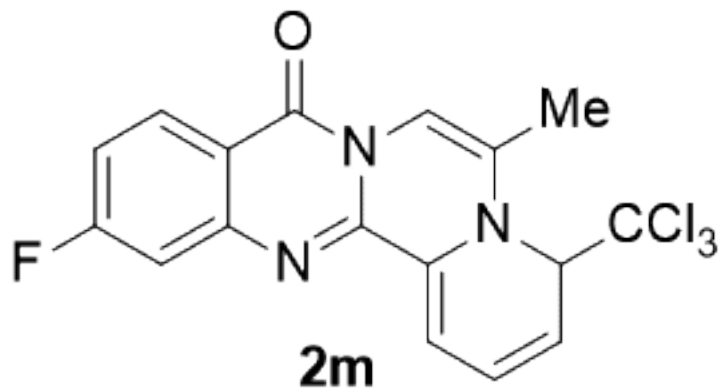

400 MHz, CDCl<sub>3</sub>

8.321  
8.305  
8.299  
8.283  
7.374  
7.350  
7.192  
7.187  
7.171  
7.149  
7.144  
7.109  
6.925  
6.910  
6.763  
6.747  
6.740  
6.724  
5.962  
5.945  
5.941  
5.923  
5.225  
5.210

2.263

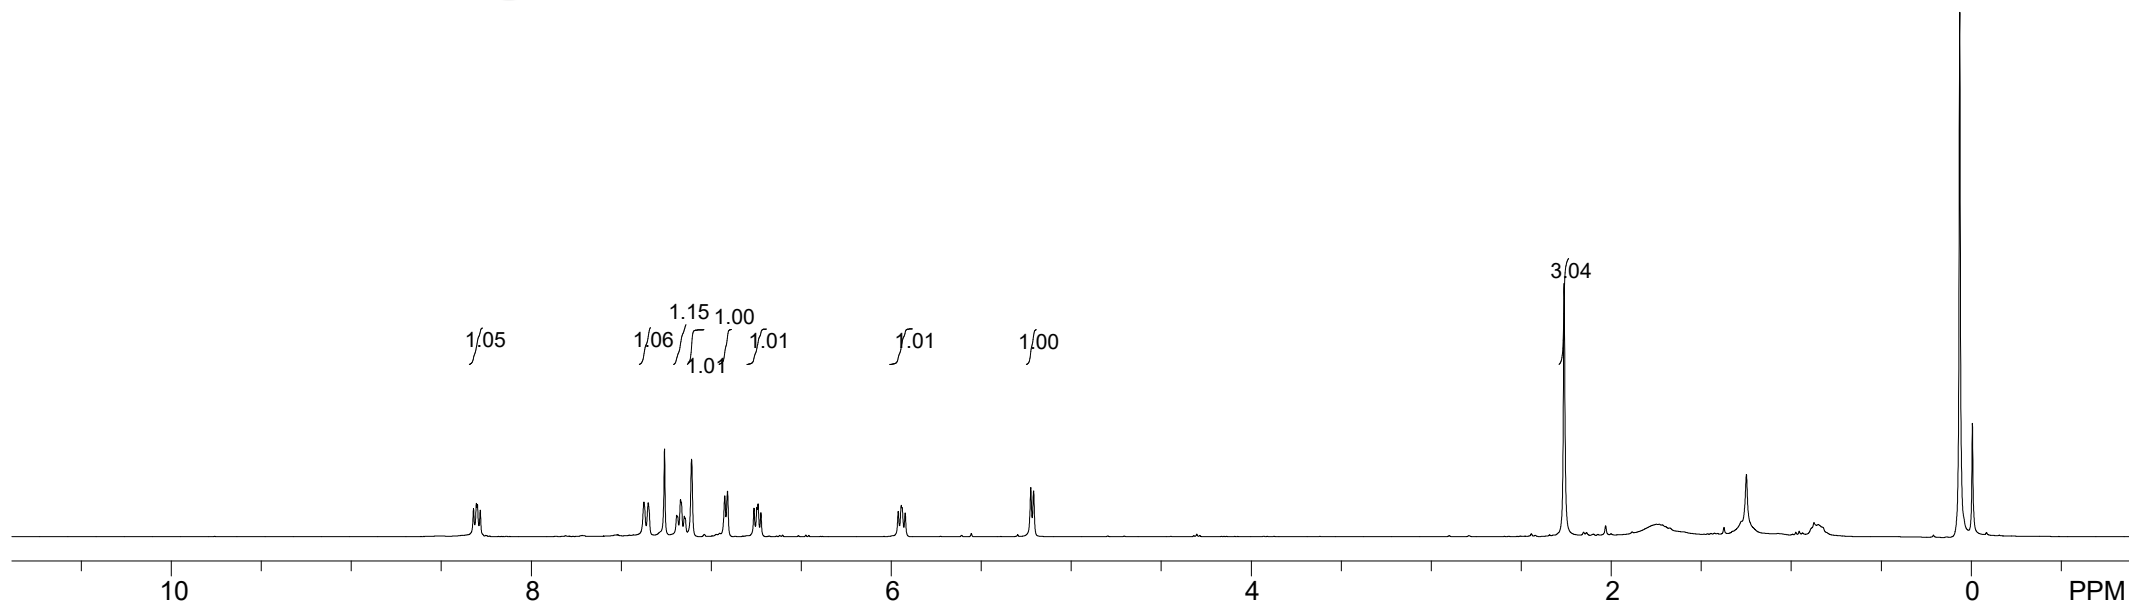

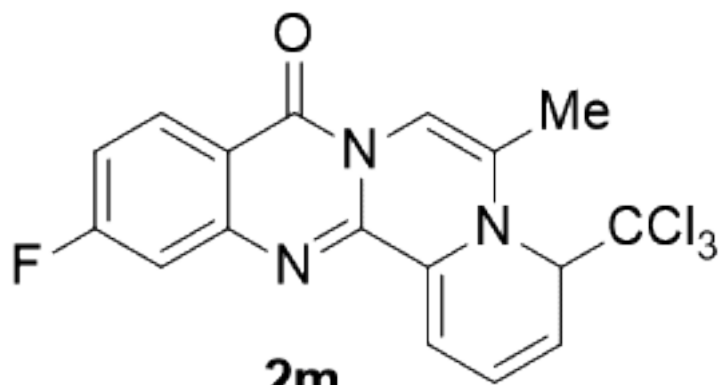

**2m**

150 MHz, CDCl<sub>3</sub>

167.44  
165.75  
156.82  
149.47  
149.38  
145.35  
132.22  
129.80  
129.73  
128.61  
128.37  
116.66  
115.81  
115.65  
114.28  
112.74  
112.60  
106.55  
103.55  
102.33

77.21  
77.00  
76.79  
66.56

16.69

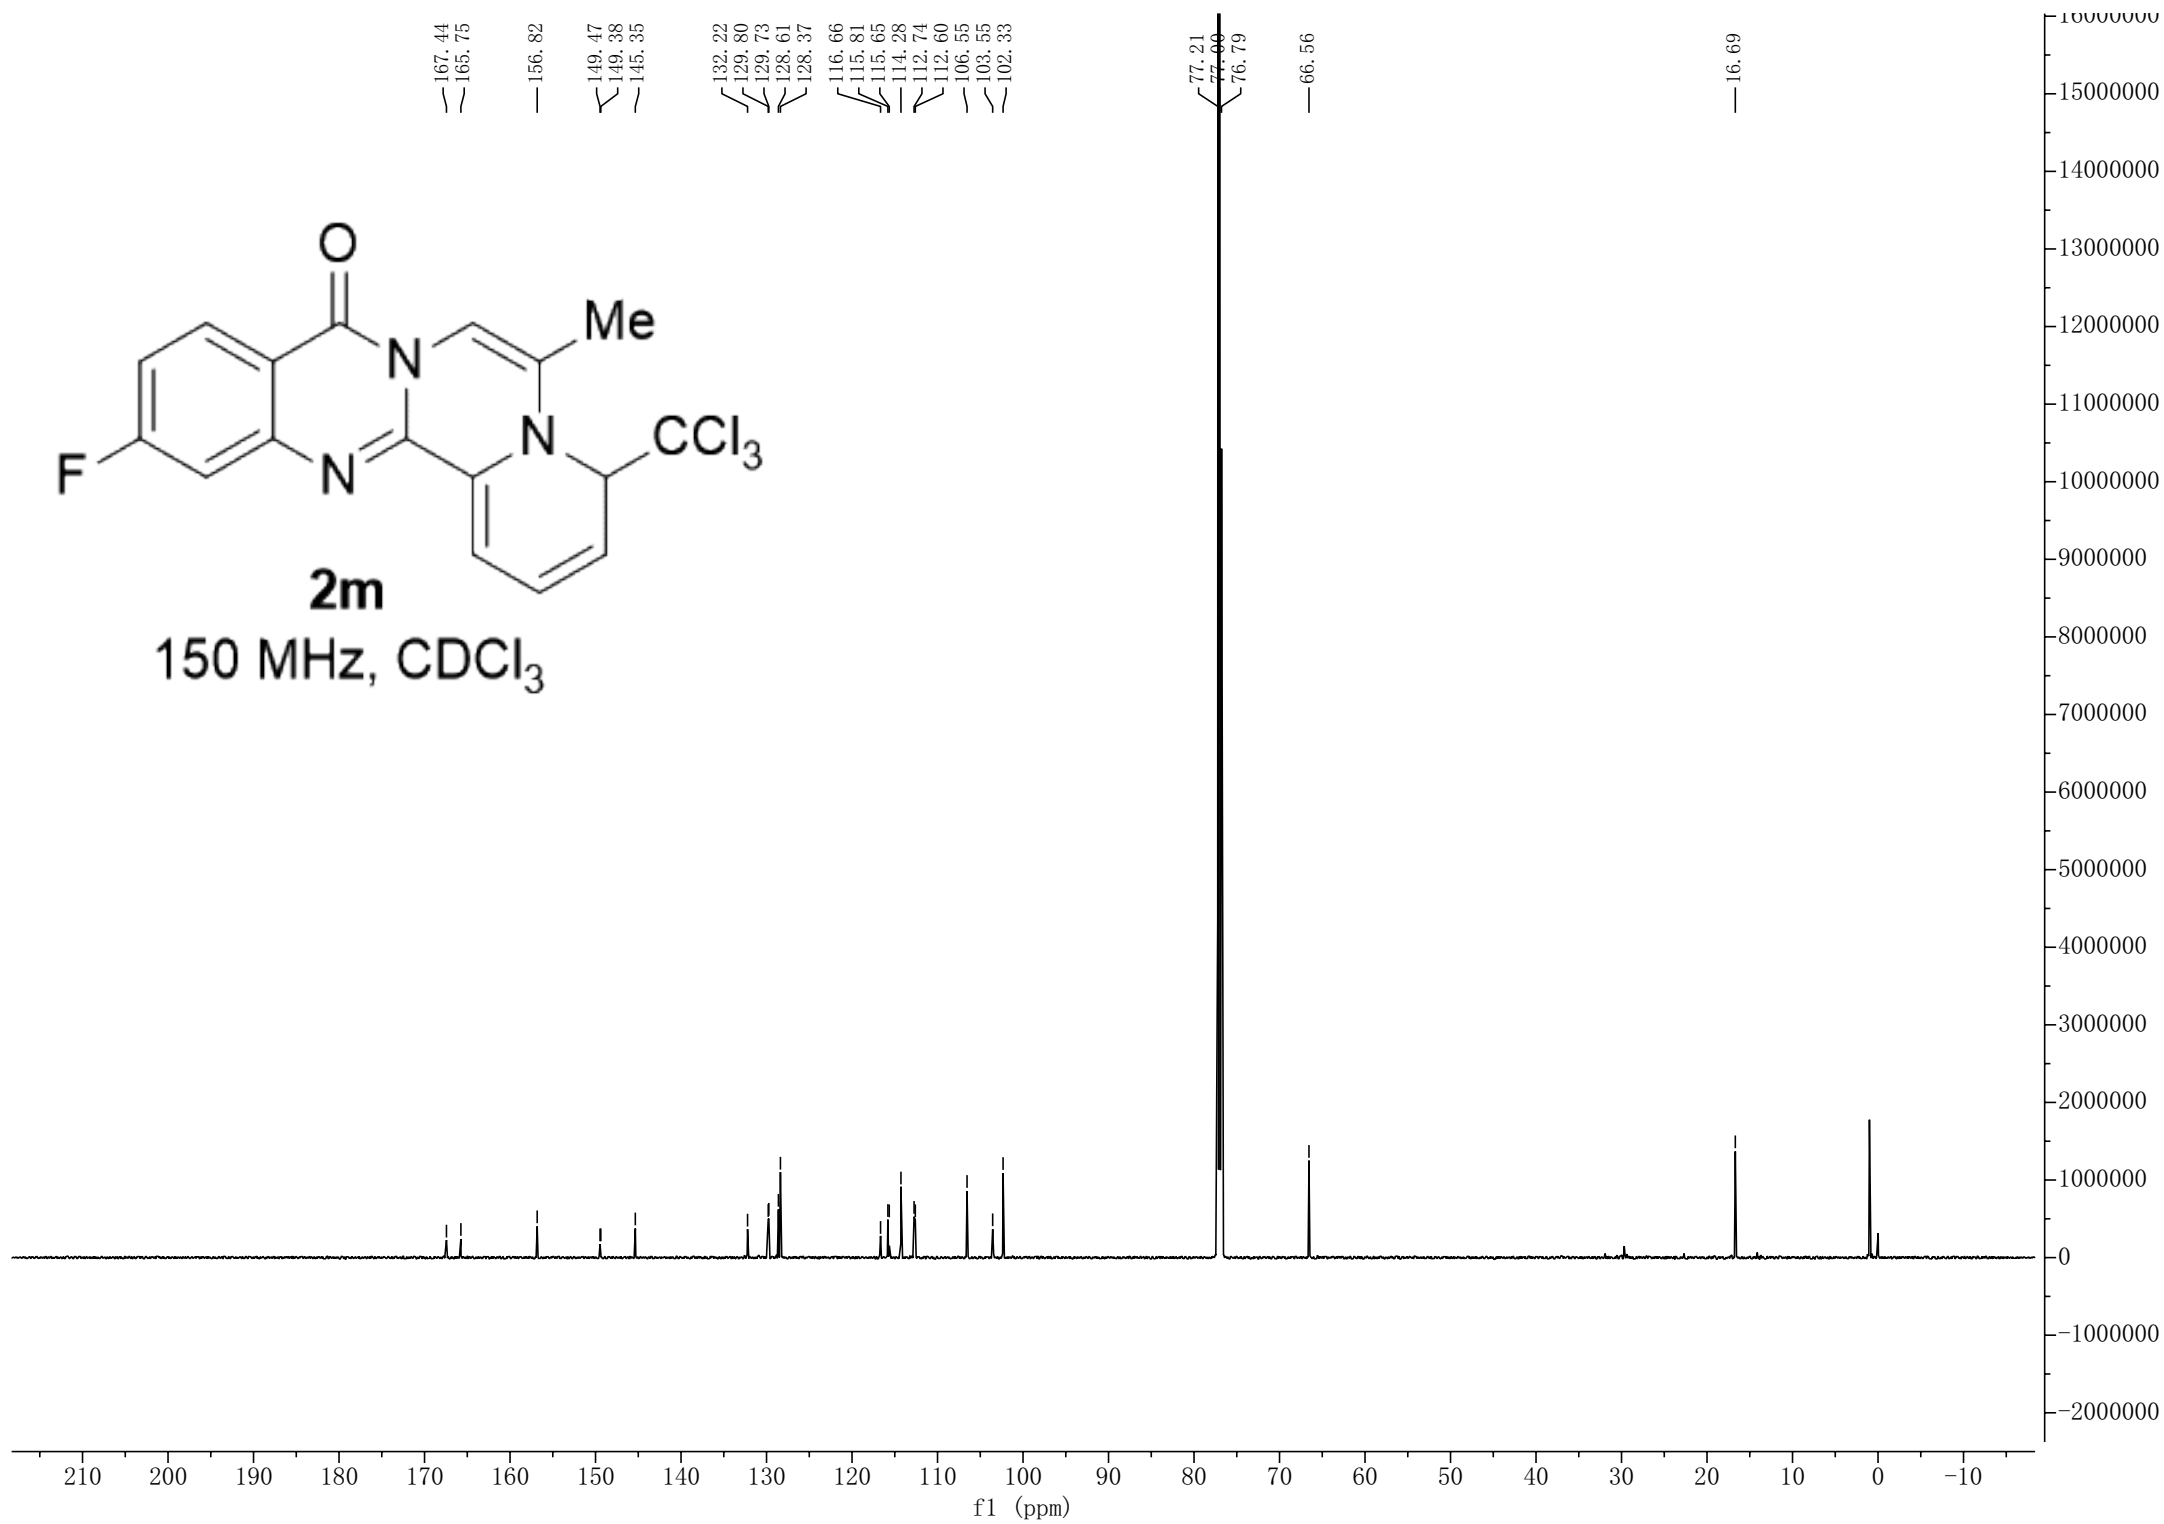

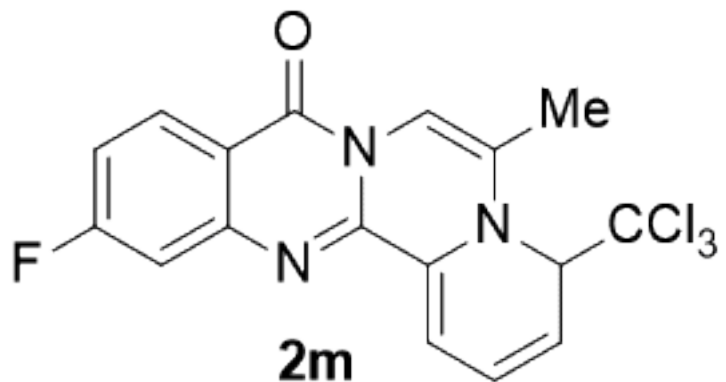

376 MHz, CDCl<sub>3</sub>

-102.830

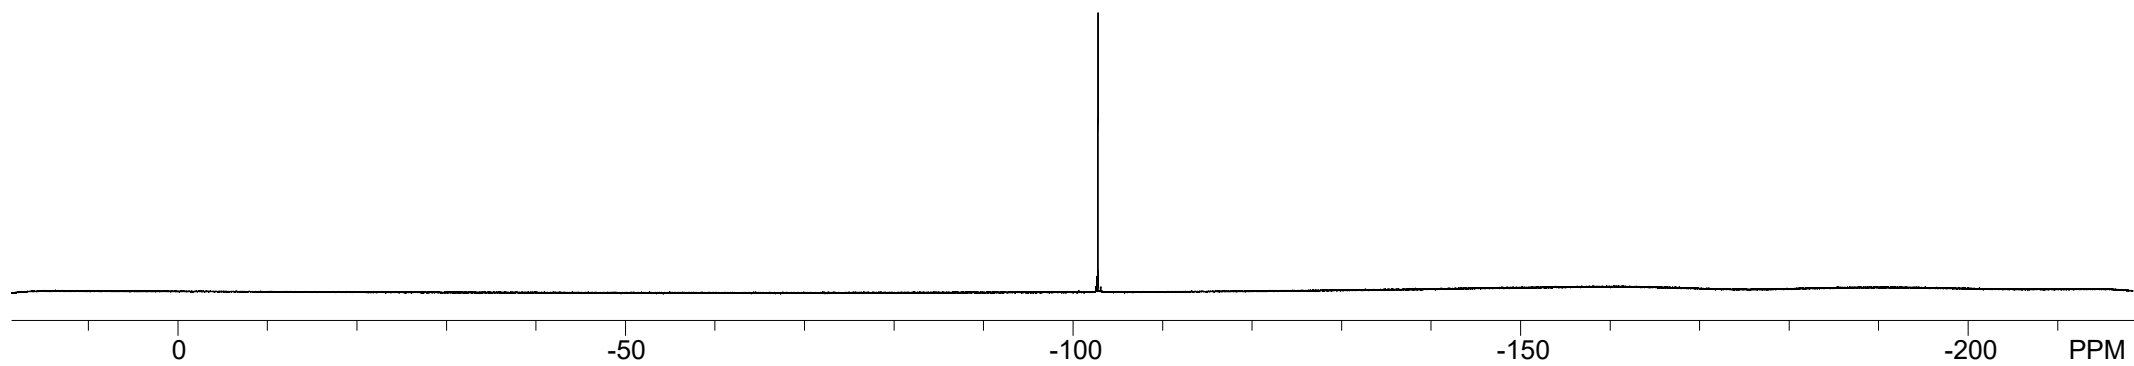



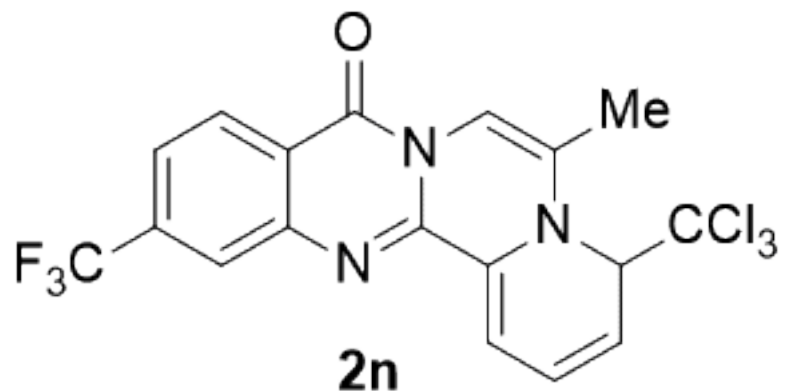

400 MHz, CDCl<sub>3</sub>

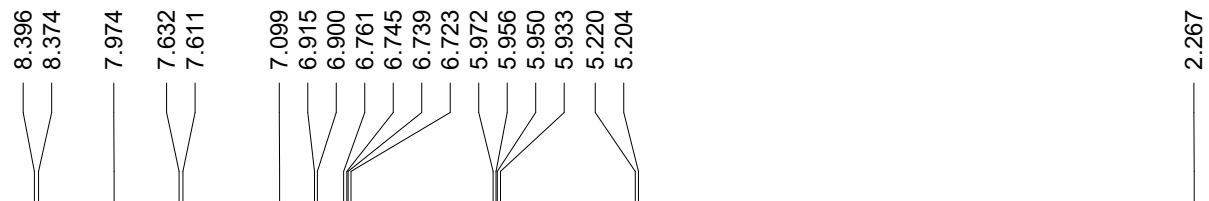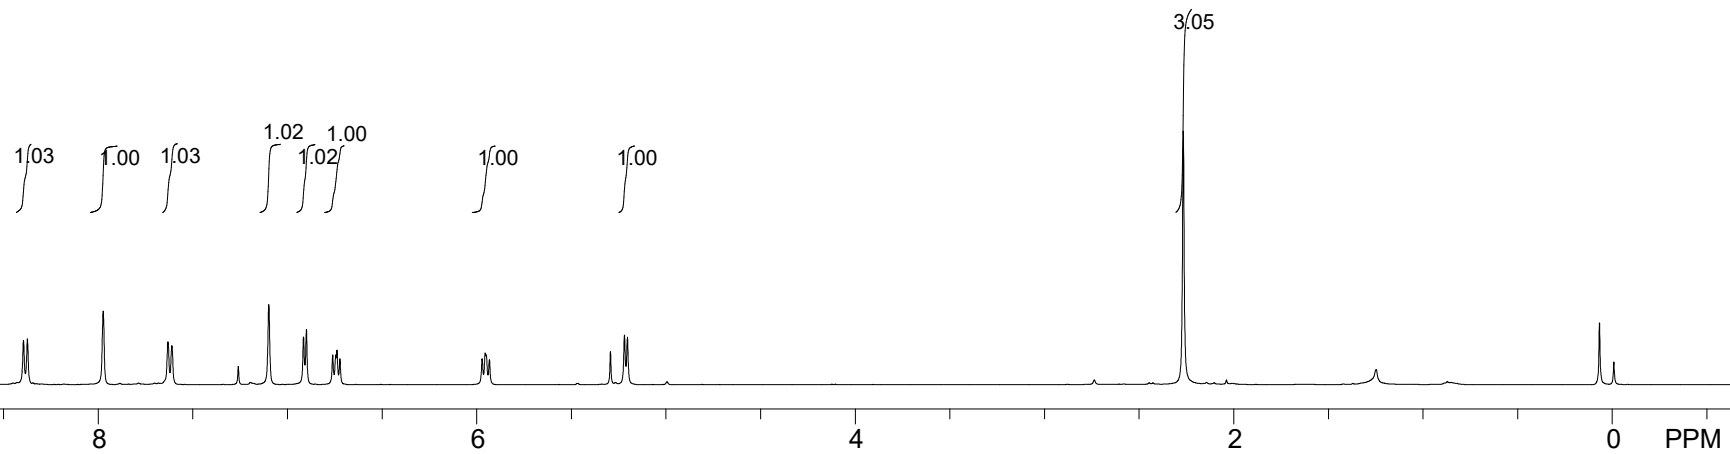

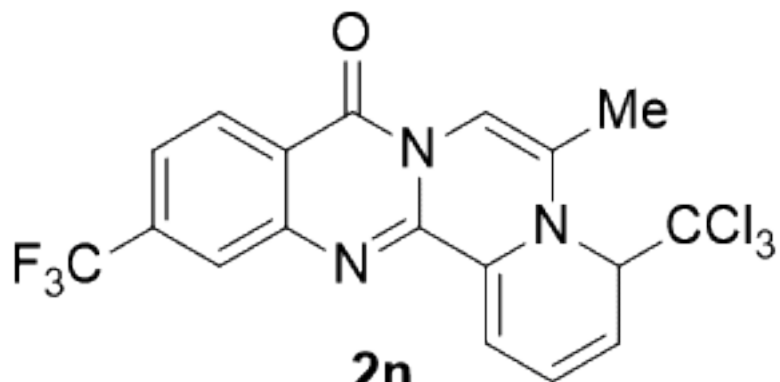

100 MHz, CDCl<sub>3</sub>

156.711  
147.370  
145.402  
136.346  
136.017  
135.689  
135.310  
132.146  
129.200  
128.318  
128.230  
128.135  
127.435  
125.241  
125.197  
125.160  
124.723  
122.477  
122.448  
122.091  
122.003  
114.551  
106.749  
103.490  
102.265  
77.314  
77.000  
76.679  
66.508  
16.685

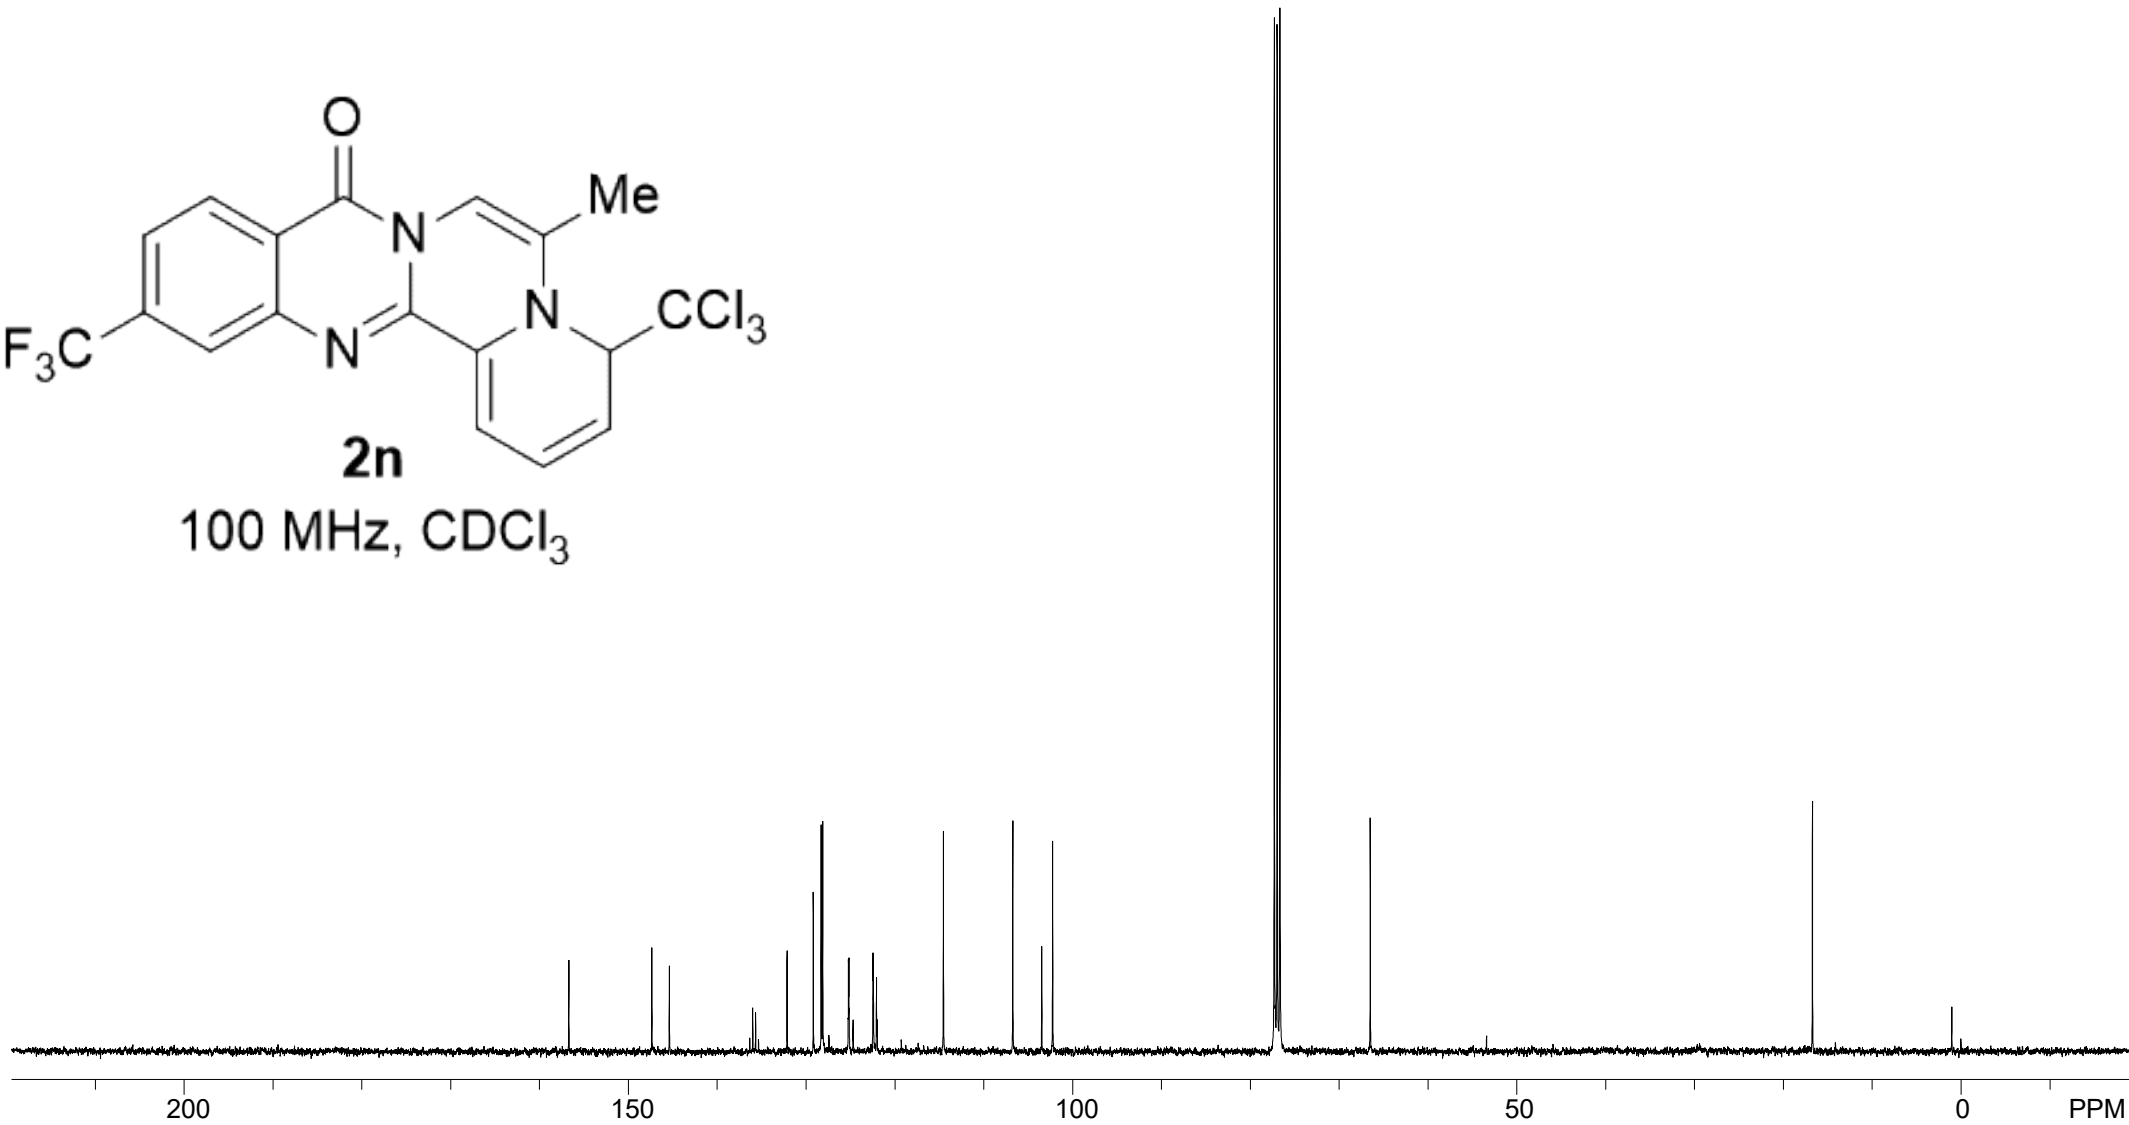

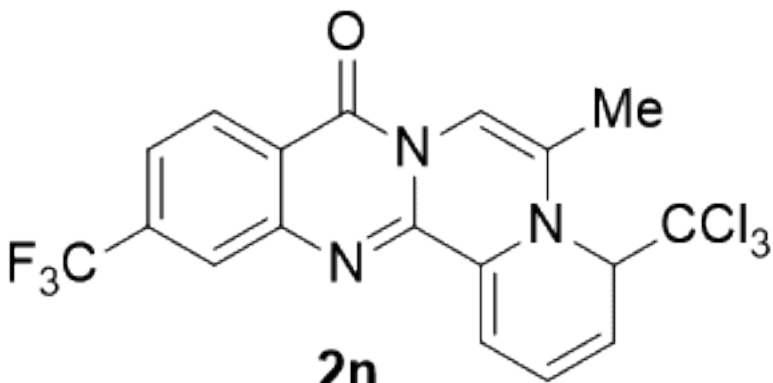

376 MHz, CDCl<sub>3</sub>

63.311

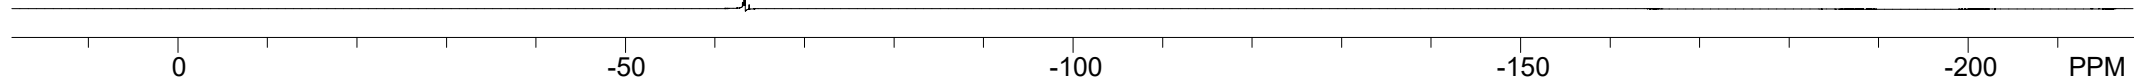

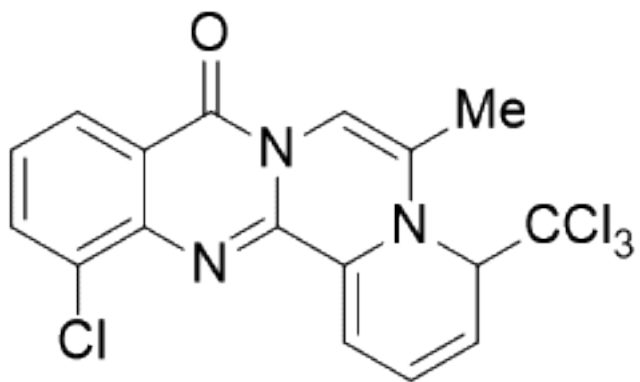

**2o**

400 MHz, CDCl<sub>3</sub>

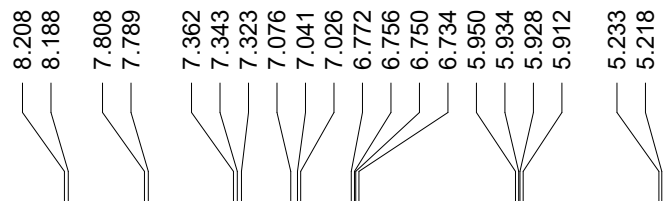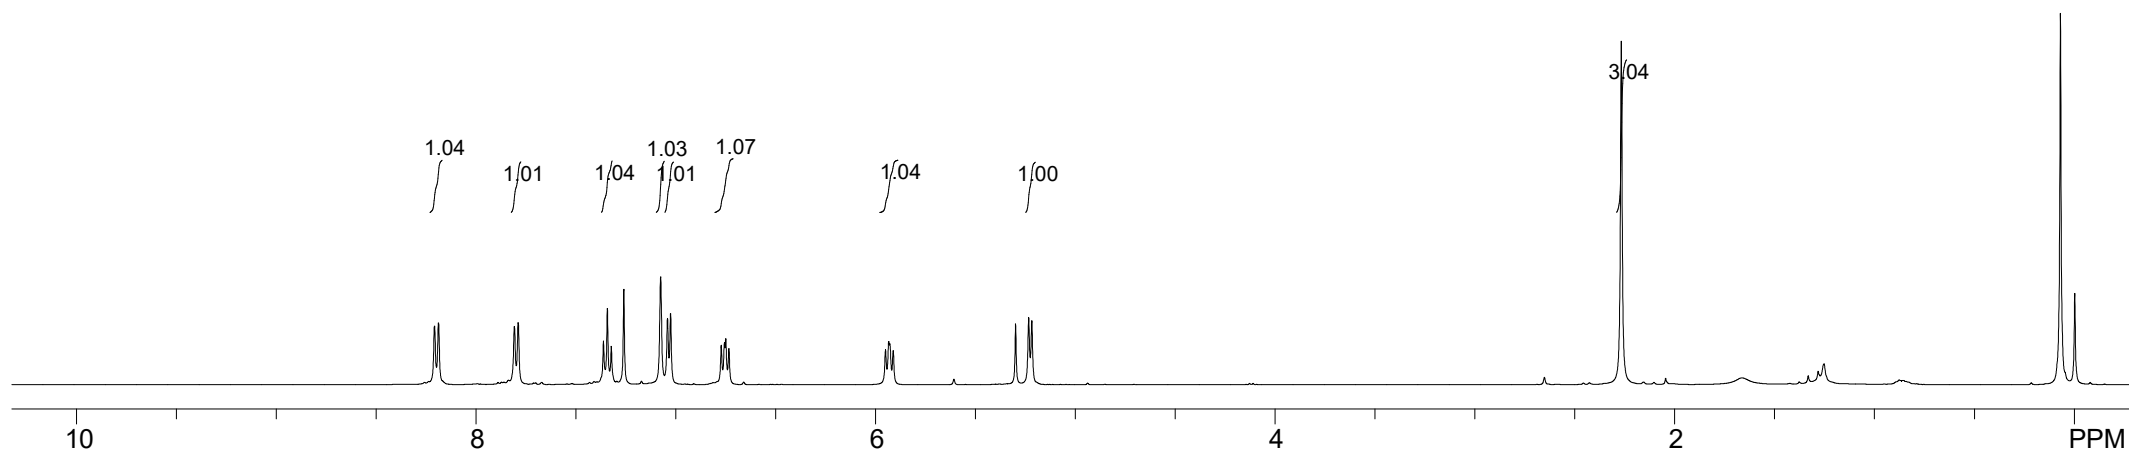

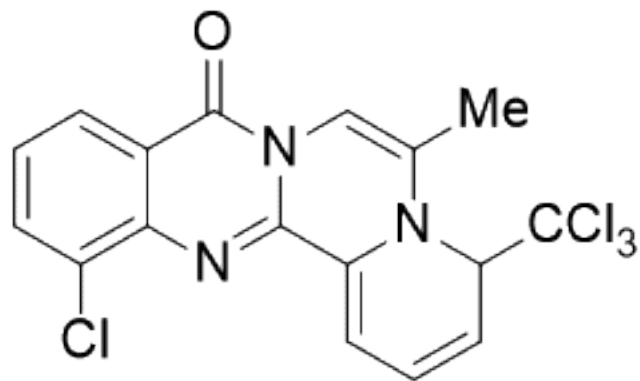

**2o**

100 MHz, CDCl<sub>3</sub>

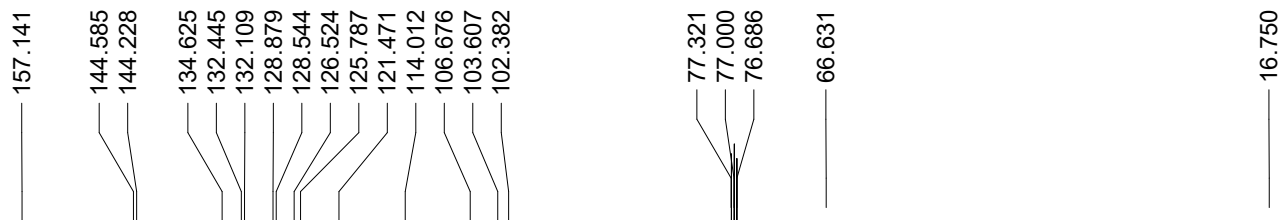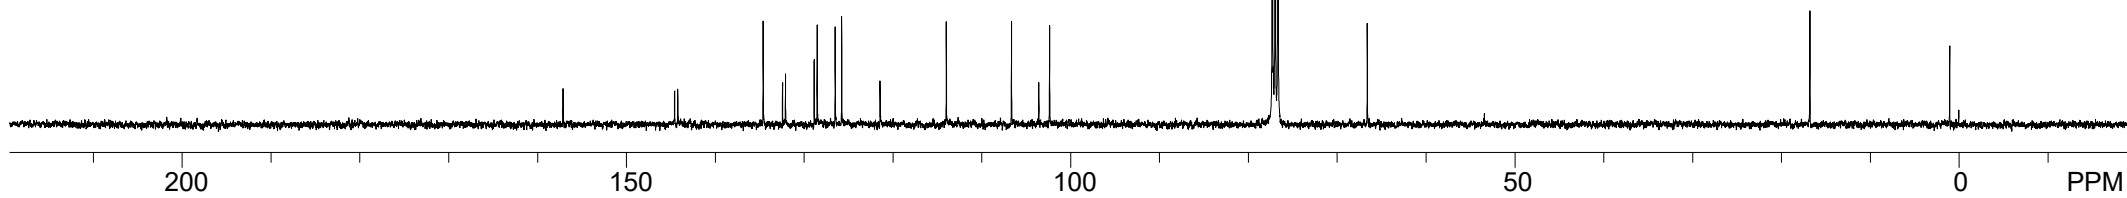

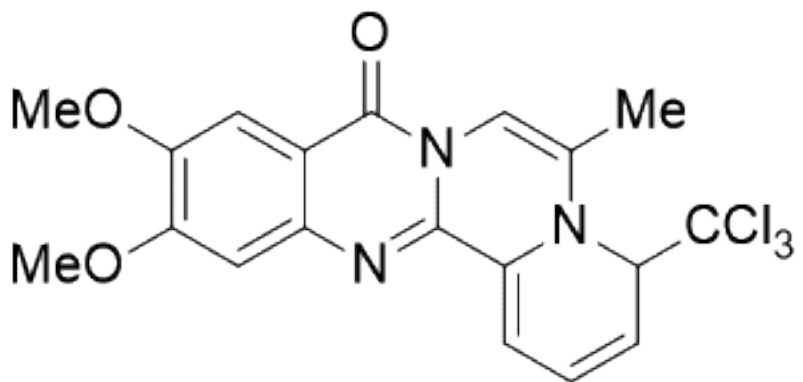

**2p**

400 MHz, CDCl<sub>3</sub>

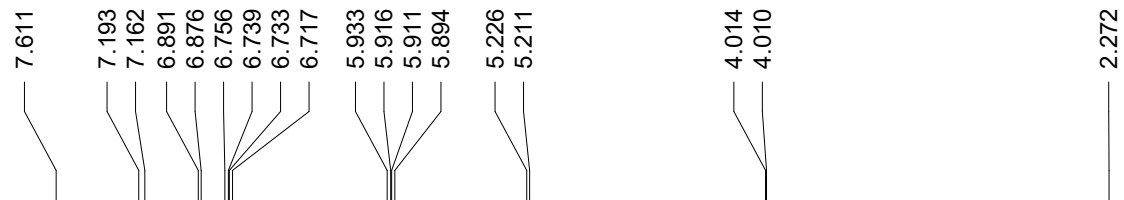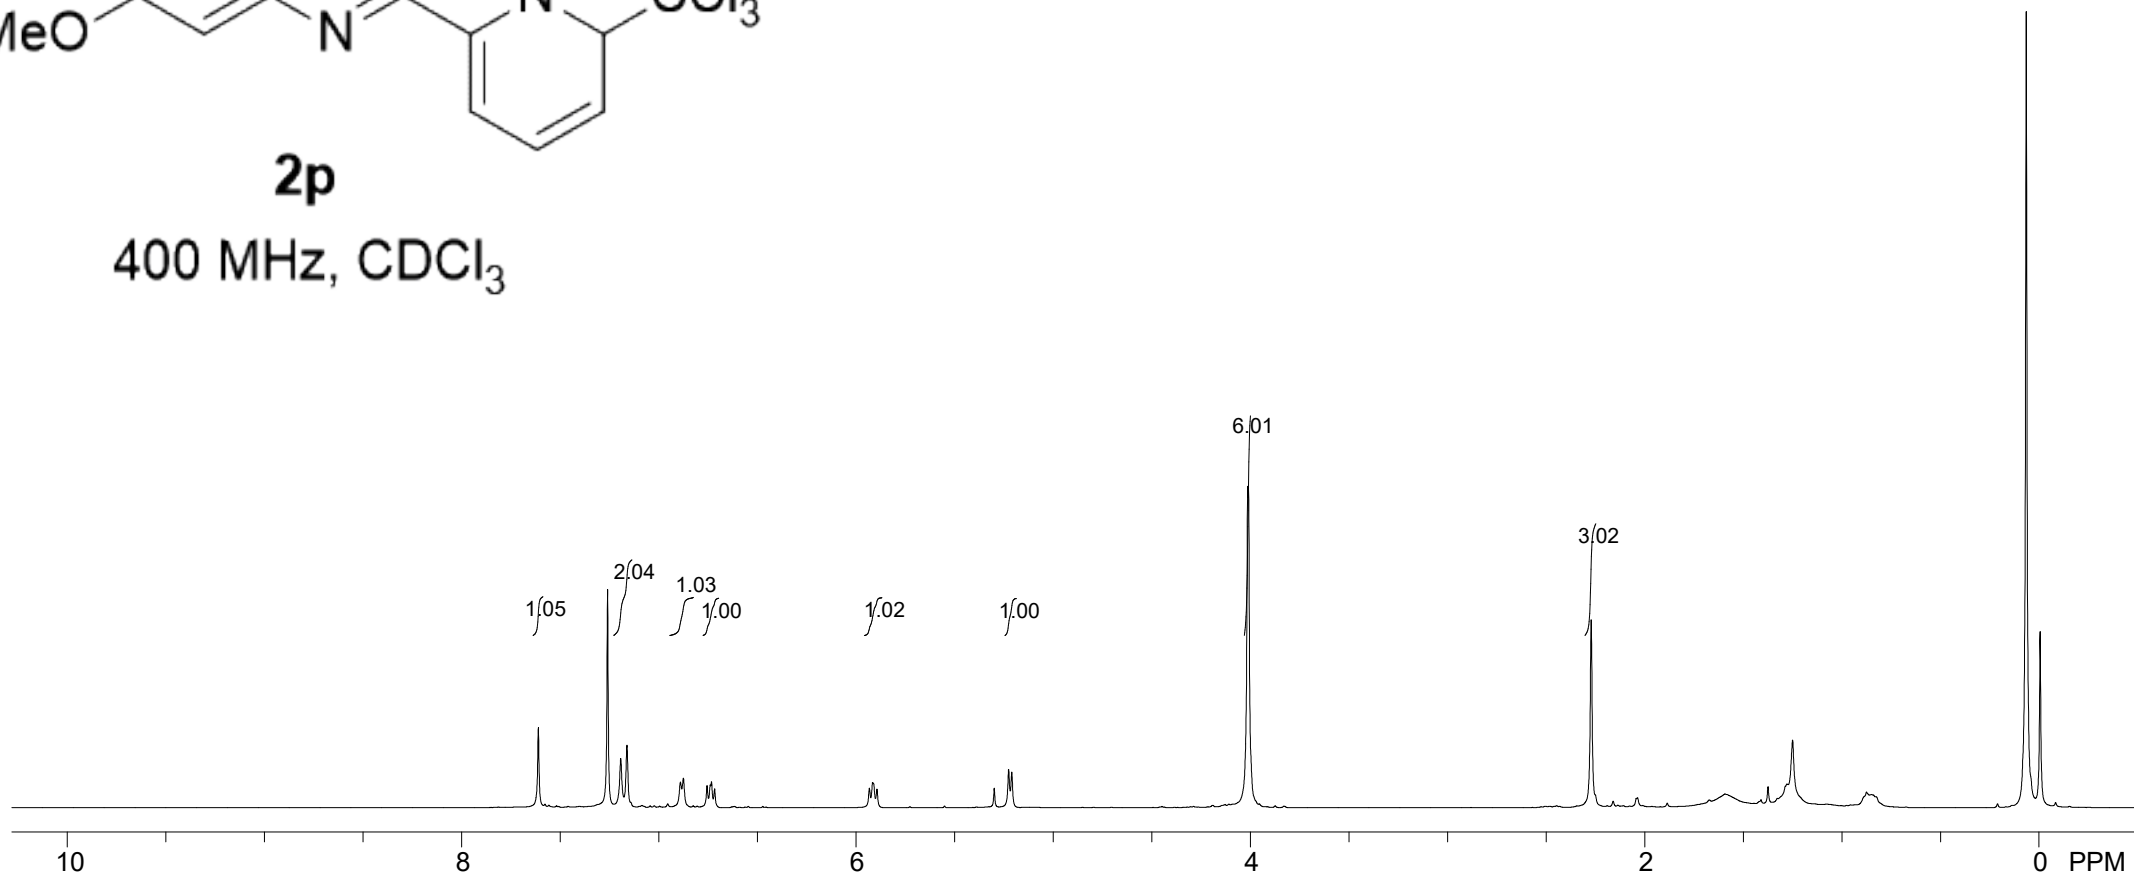

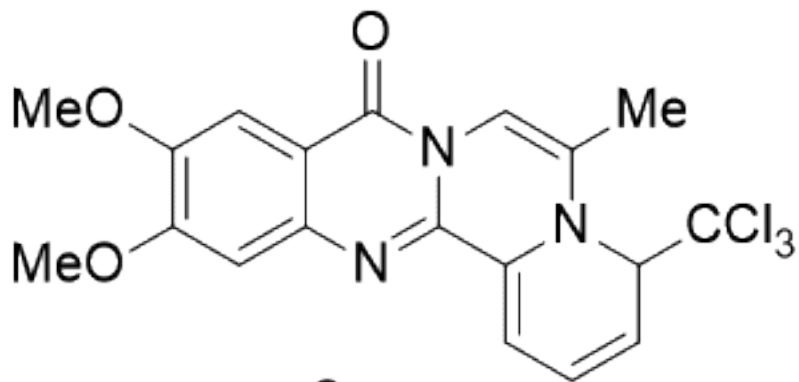

**2p**

150 MHz, CDCl<sub>3</sub>

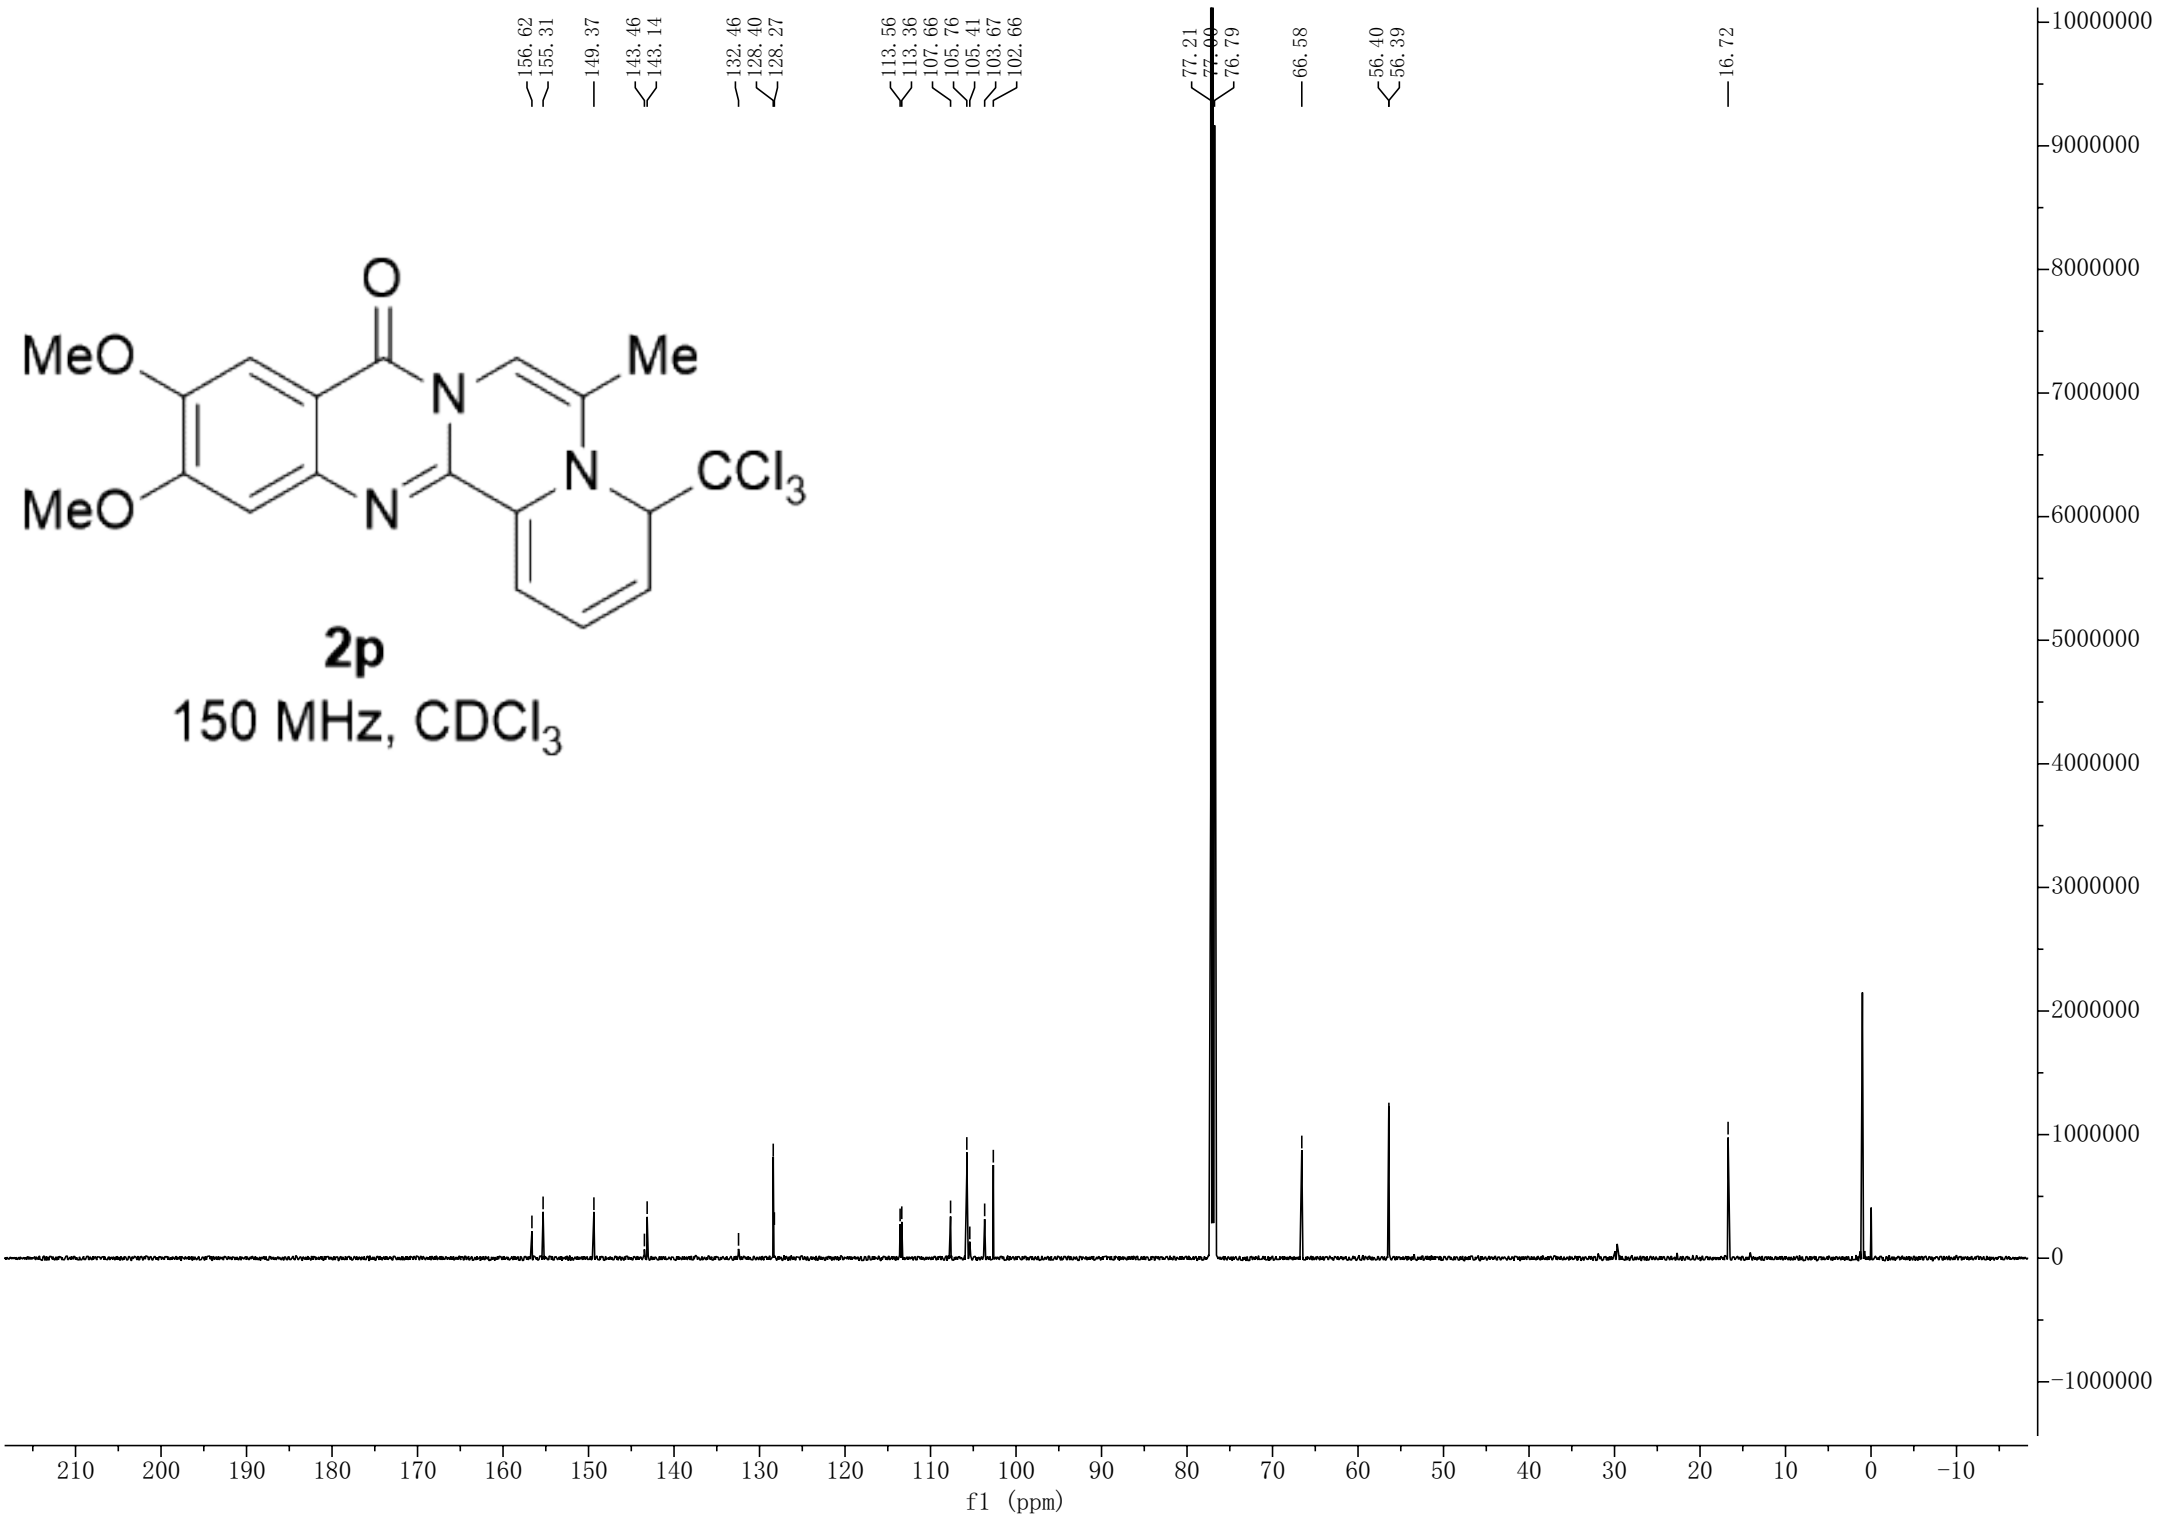

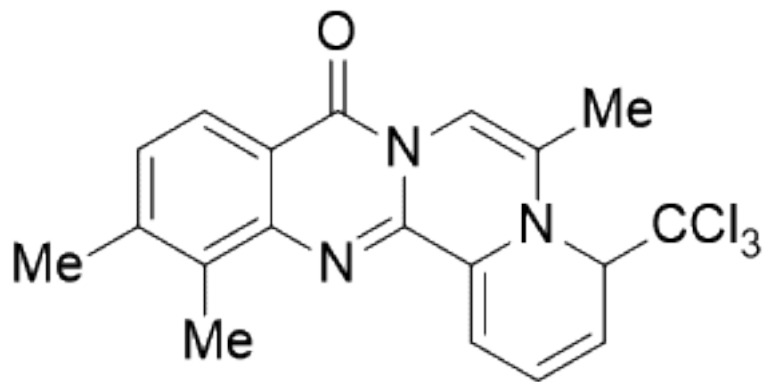

**2q**

400 MHz, CDCl<sub>3</sub>

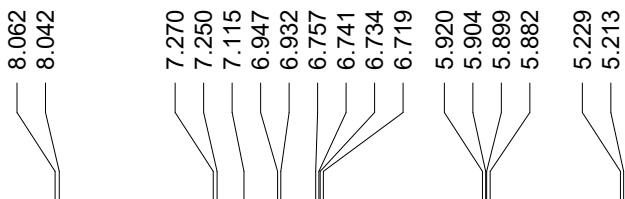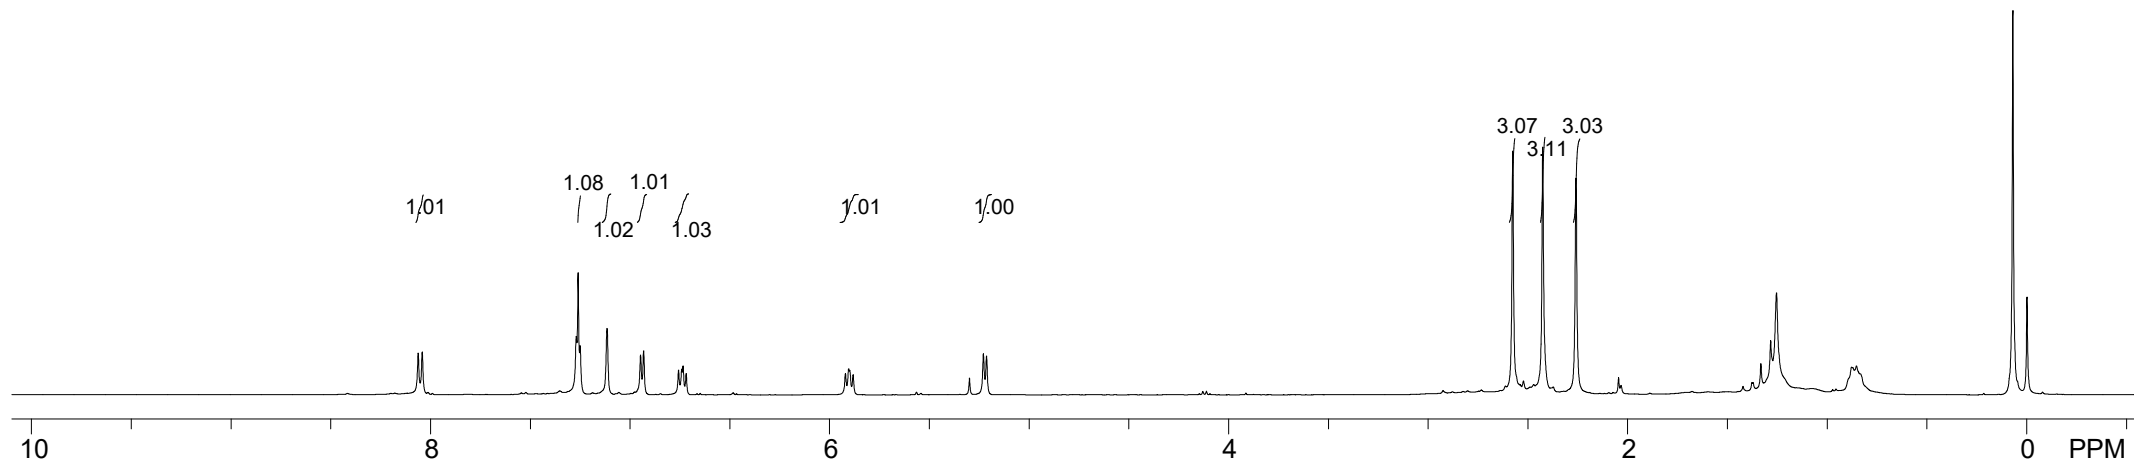



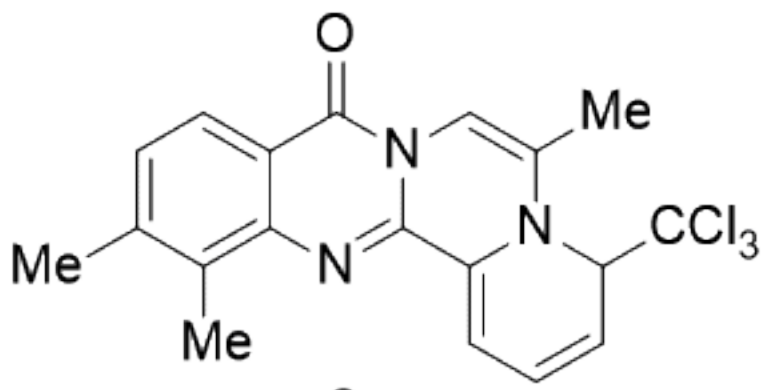

2q

100 MHz, CDCl<sub>3</sub>

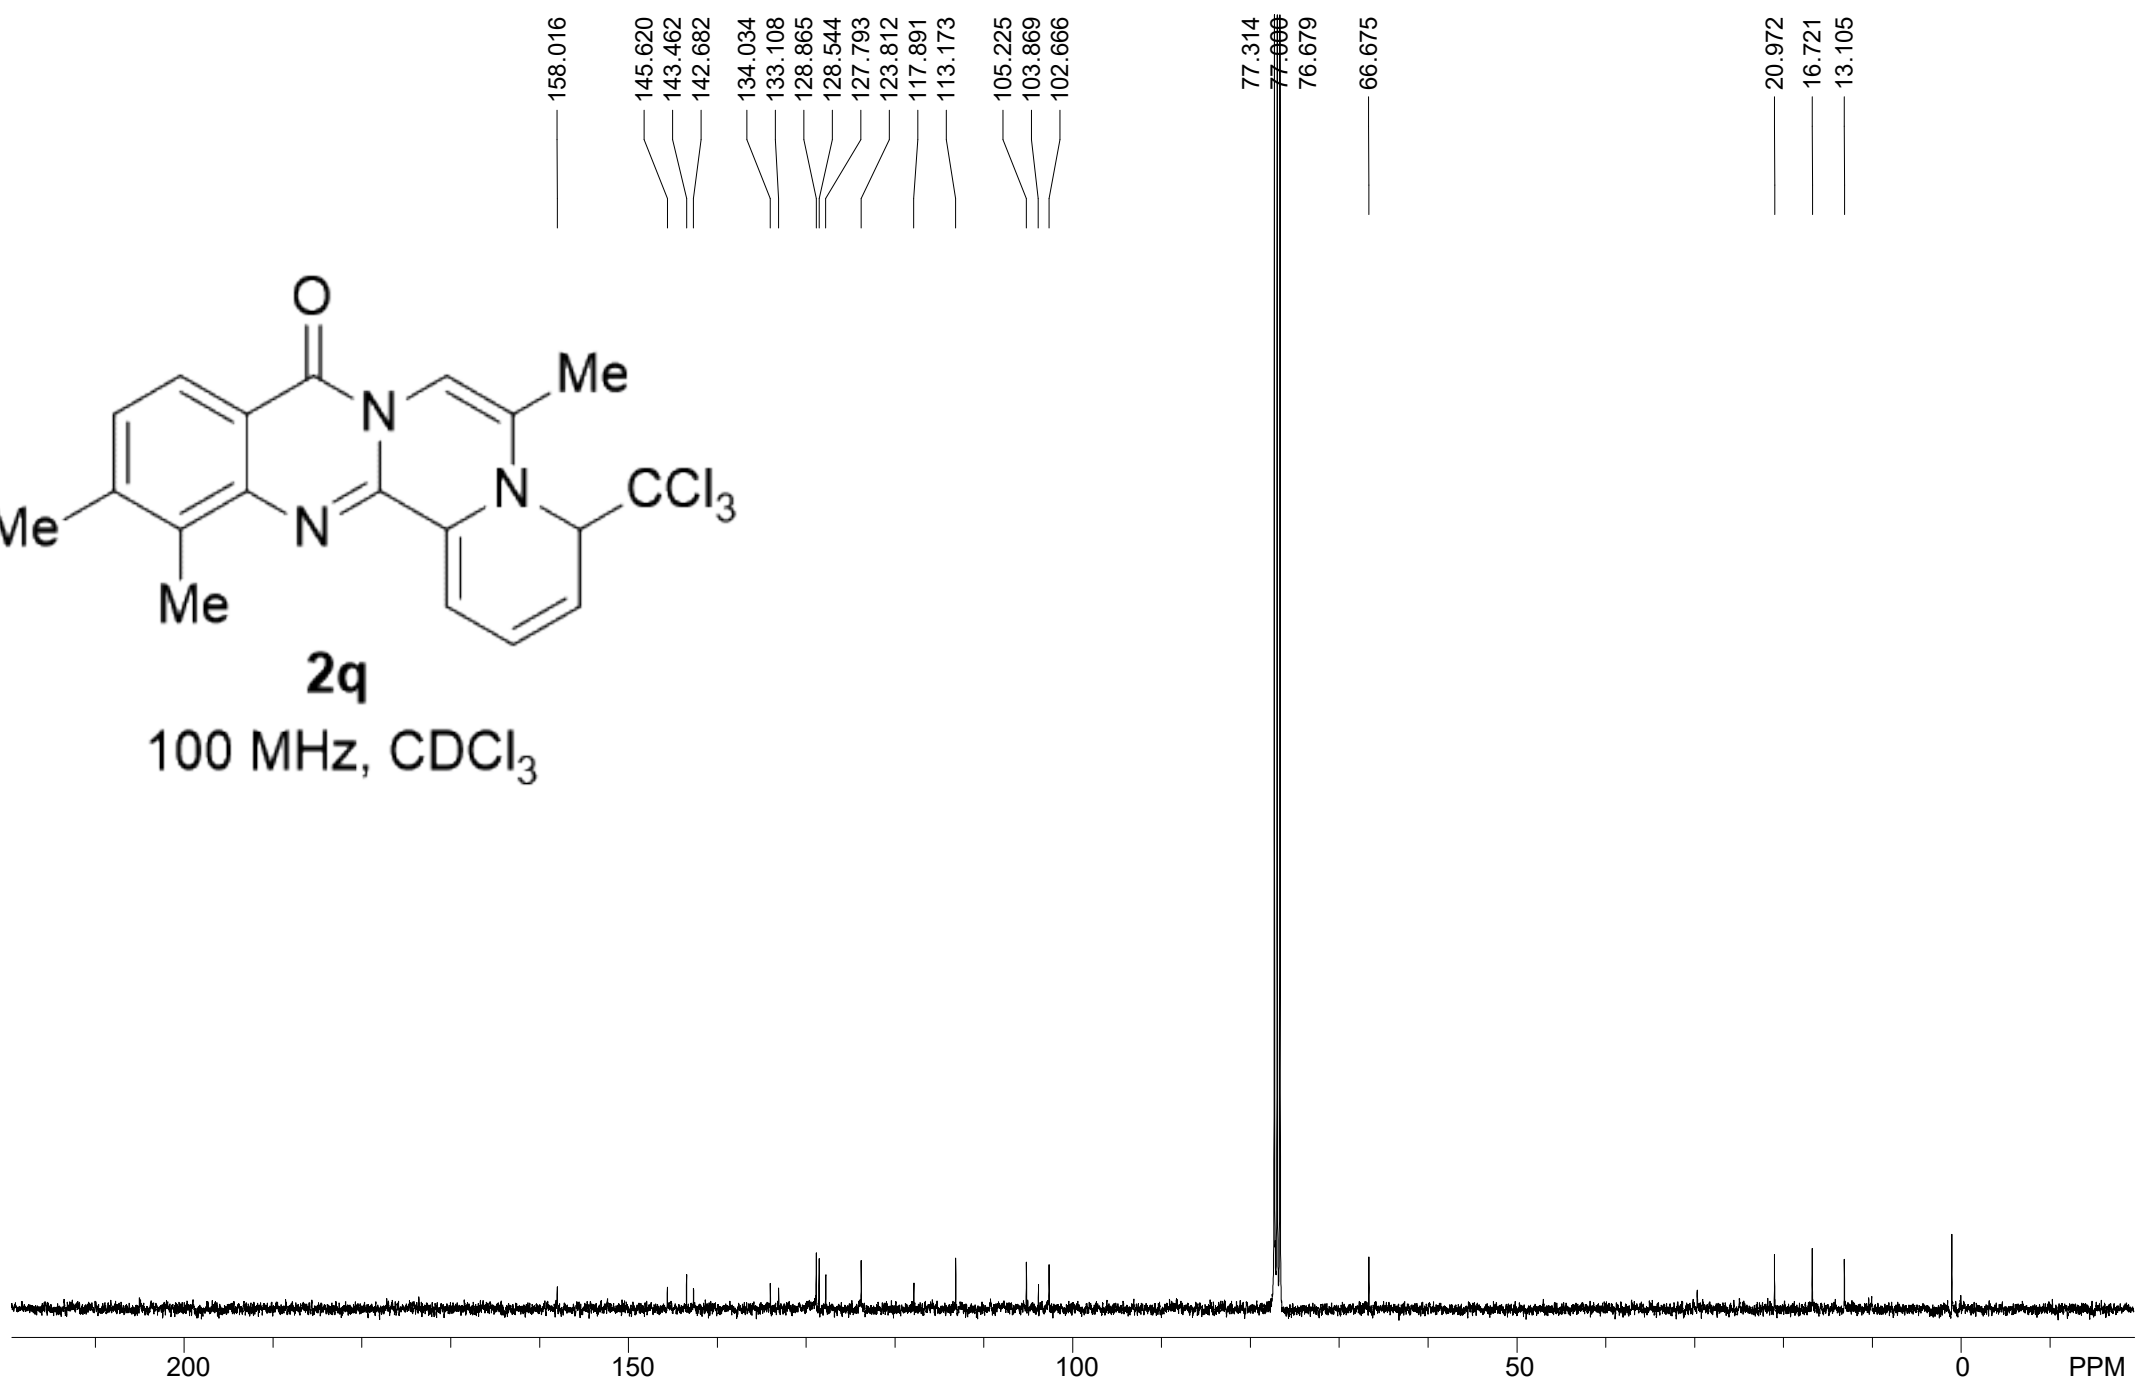

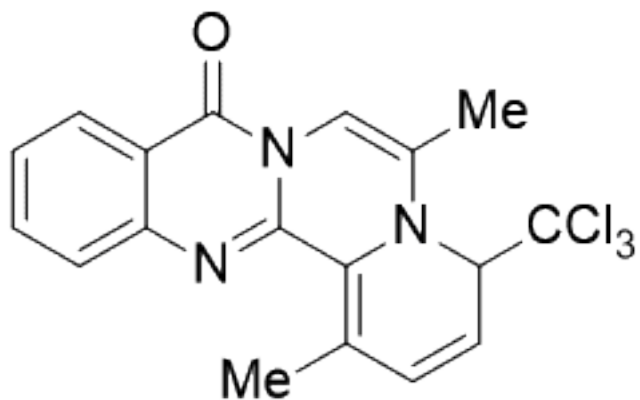

**2r**

500 MHz, CDCl<sub>3</sub>

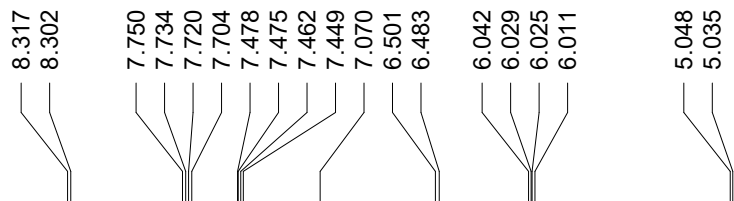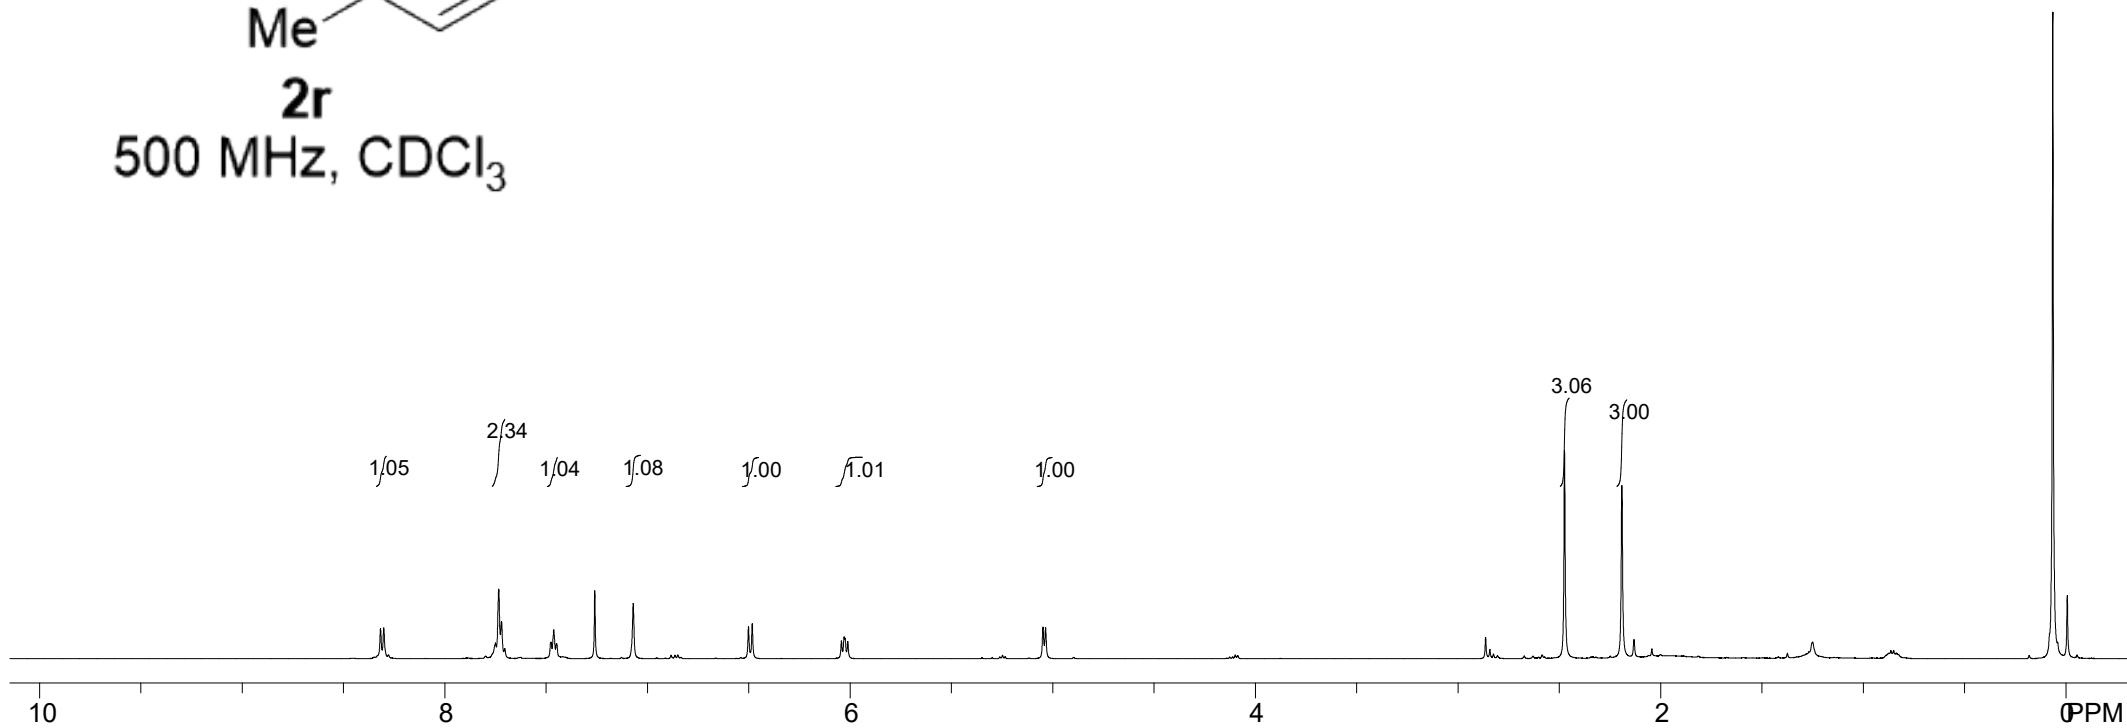

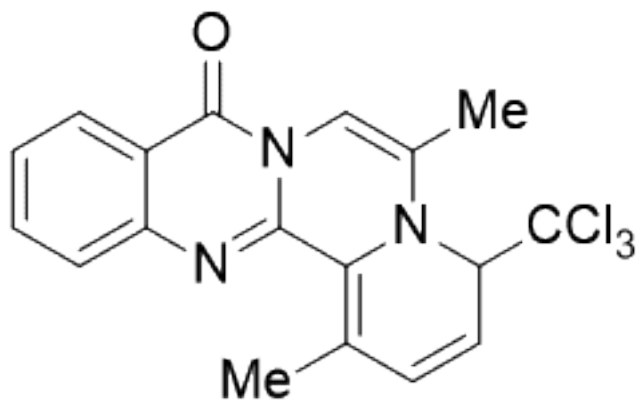

**2r**  
125 MHz, CDCl<sub>3</sub>

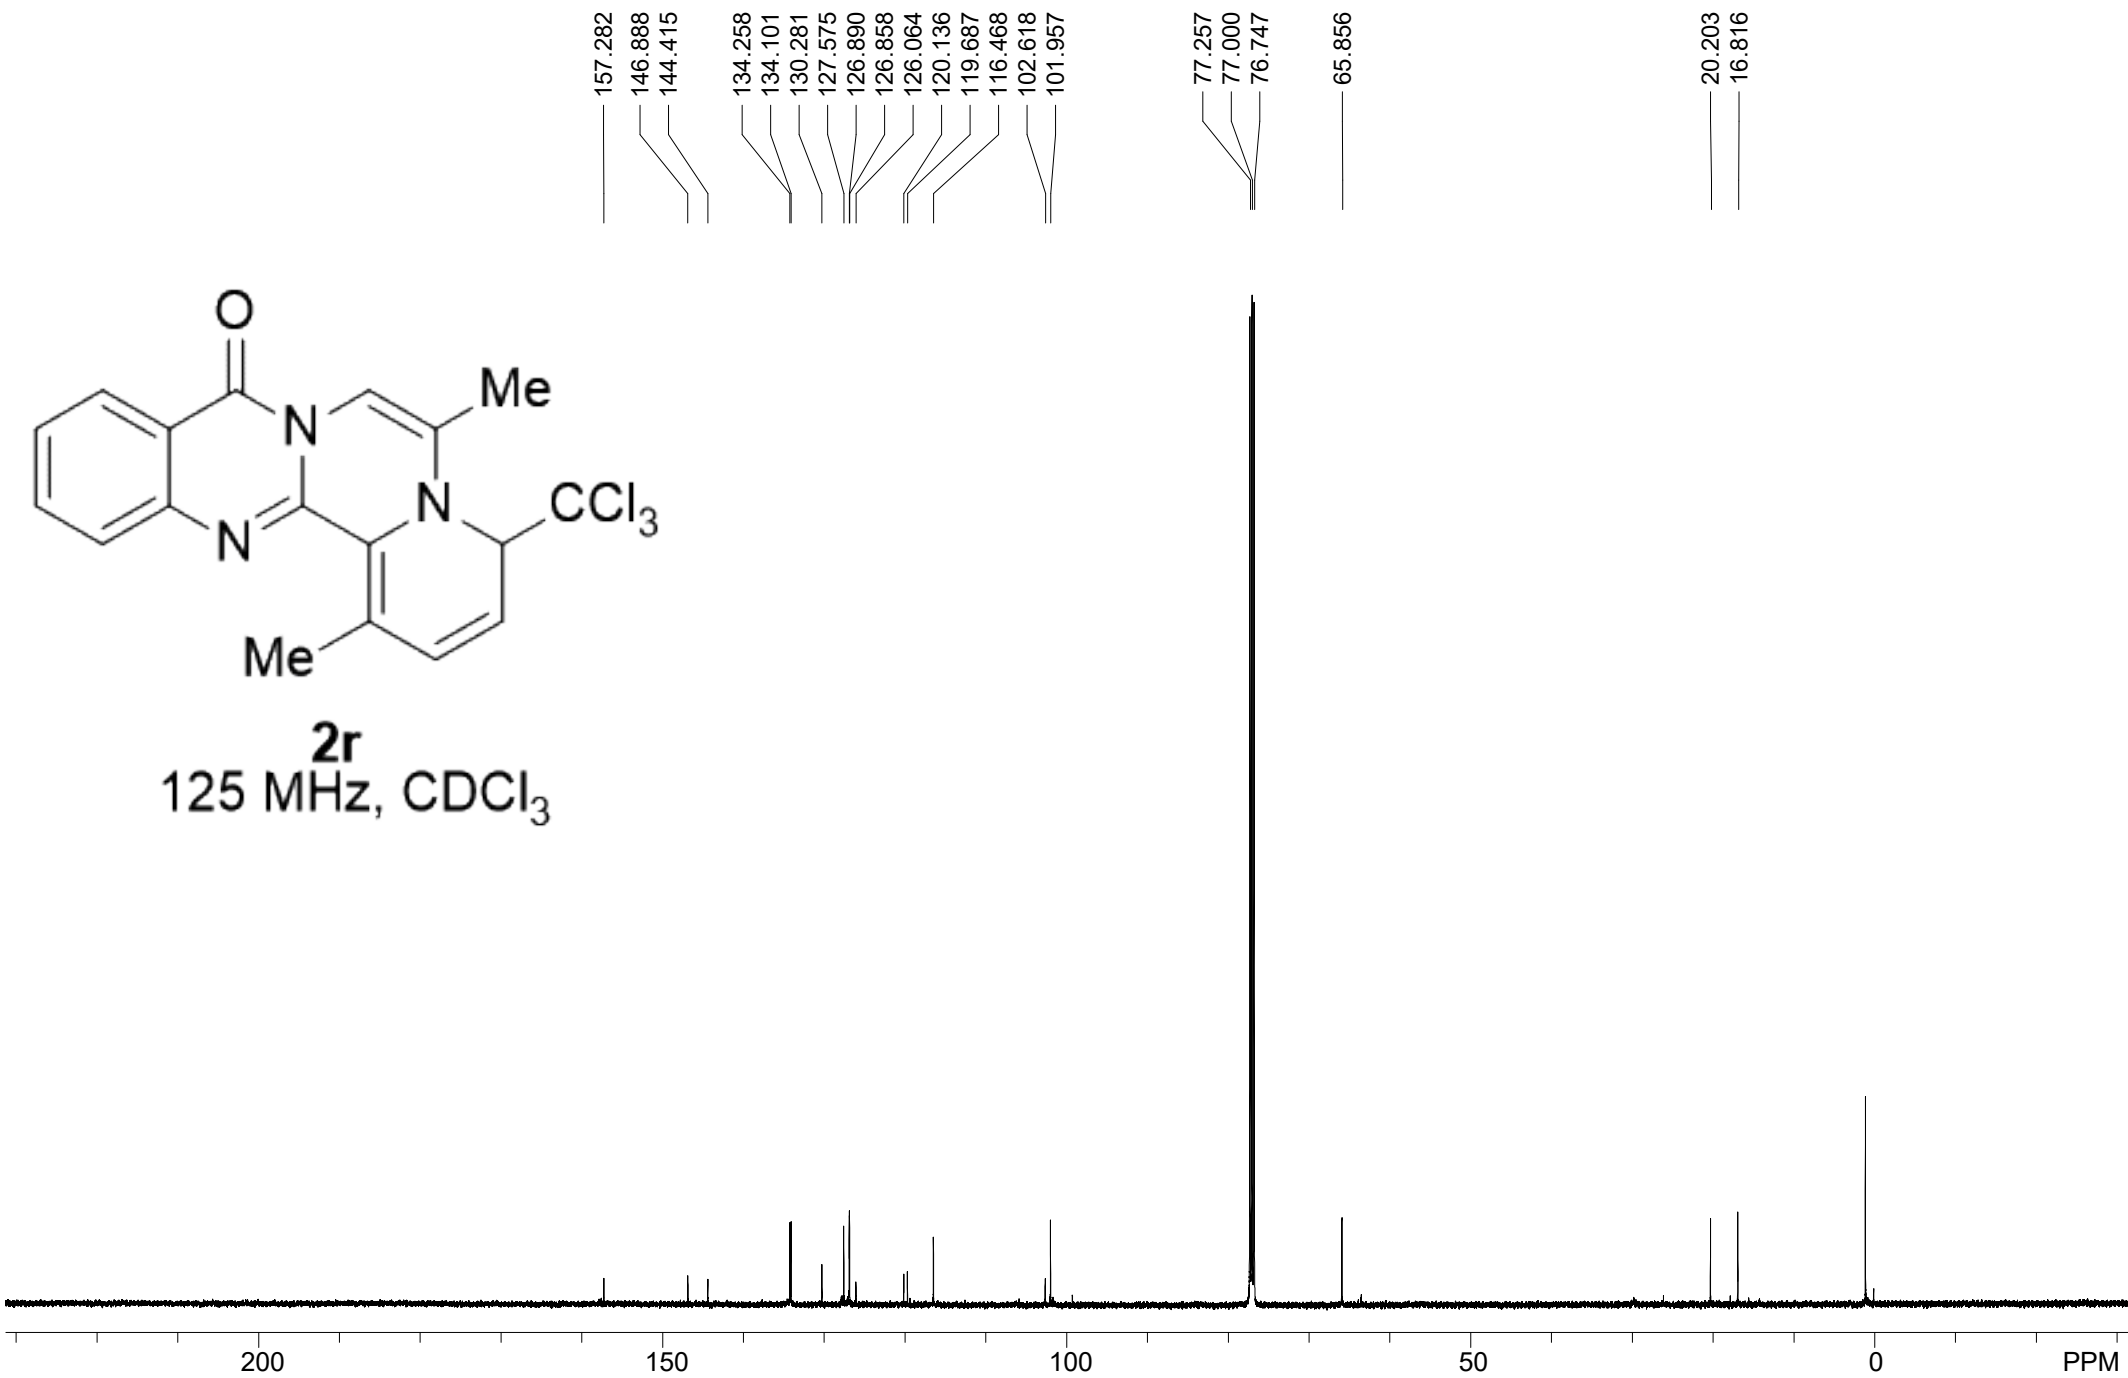

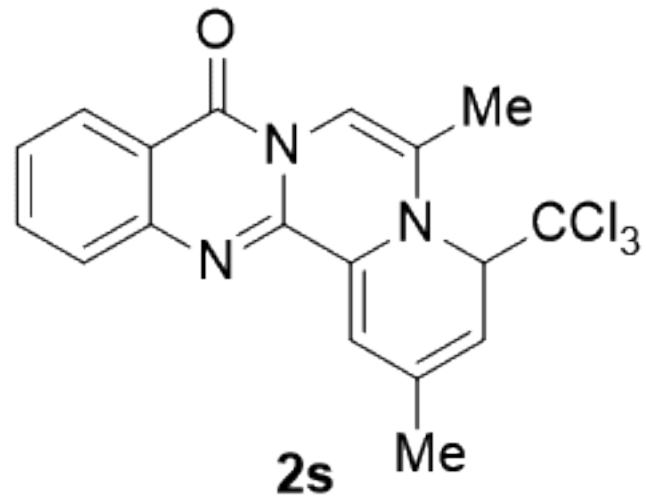

400 MHz, CDCl<sub>3</sub>

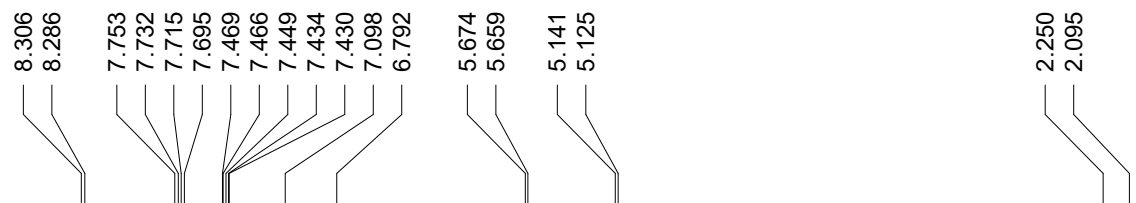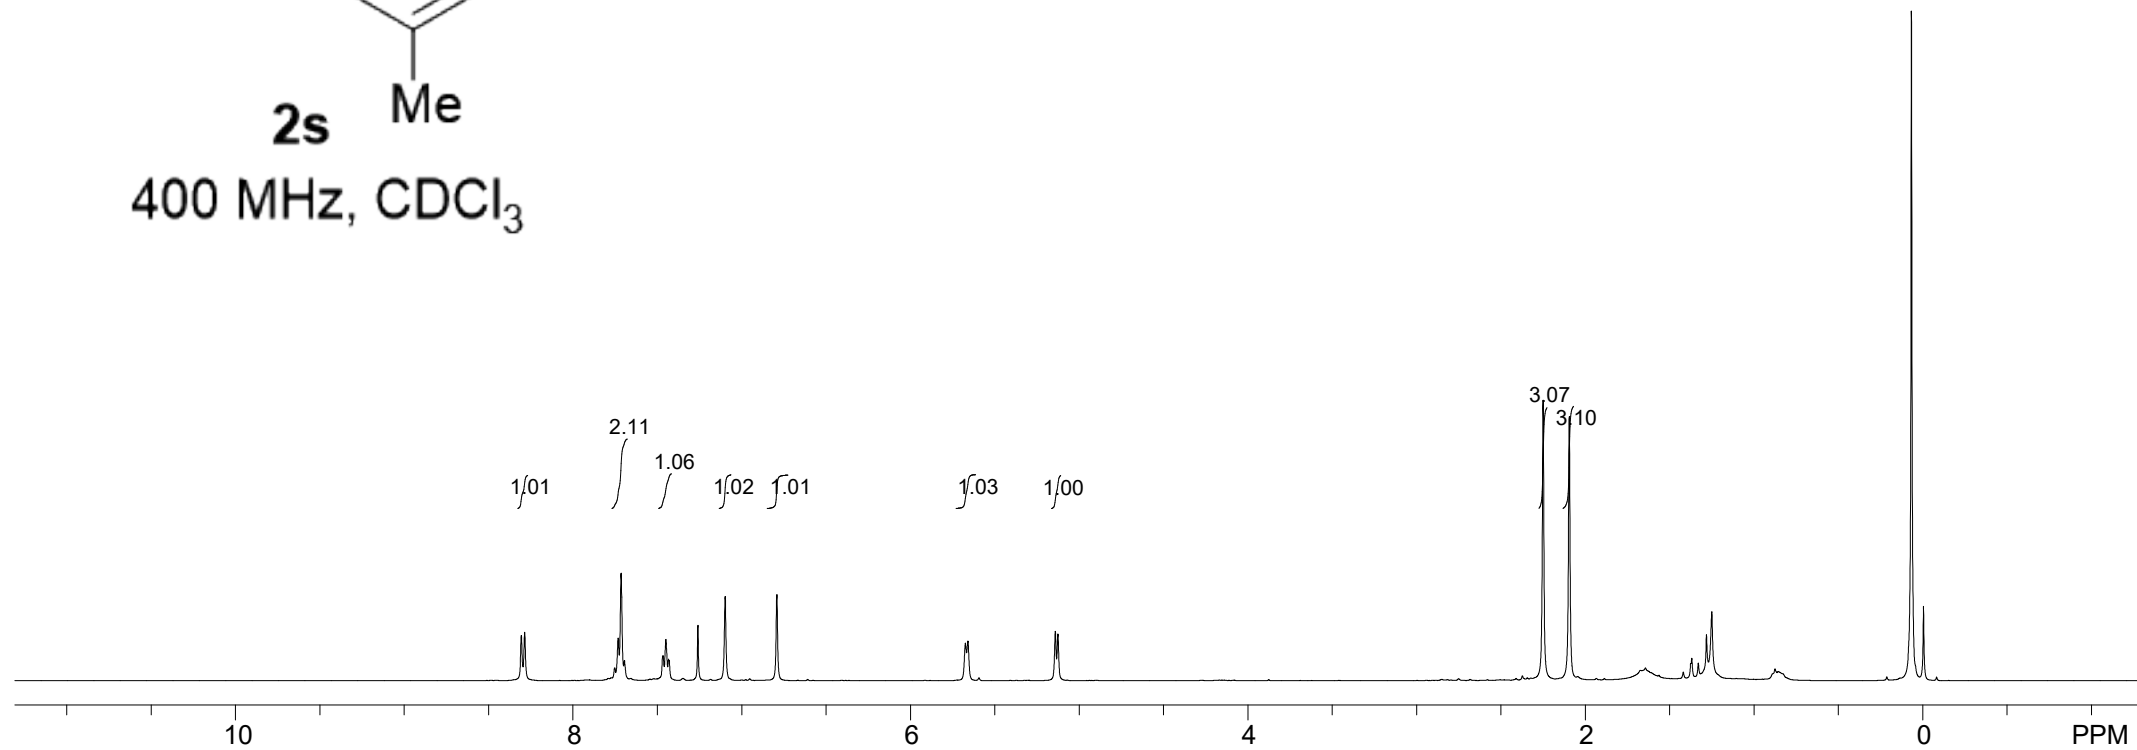

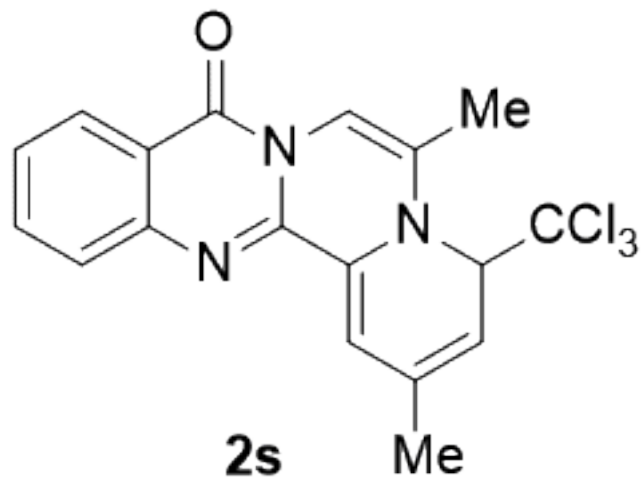

100 MHz, CDCl<sub>3</sub>

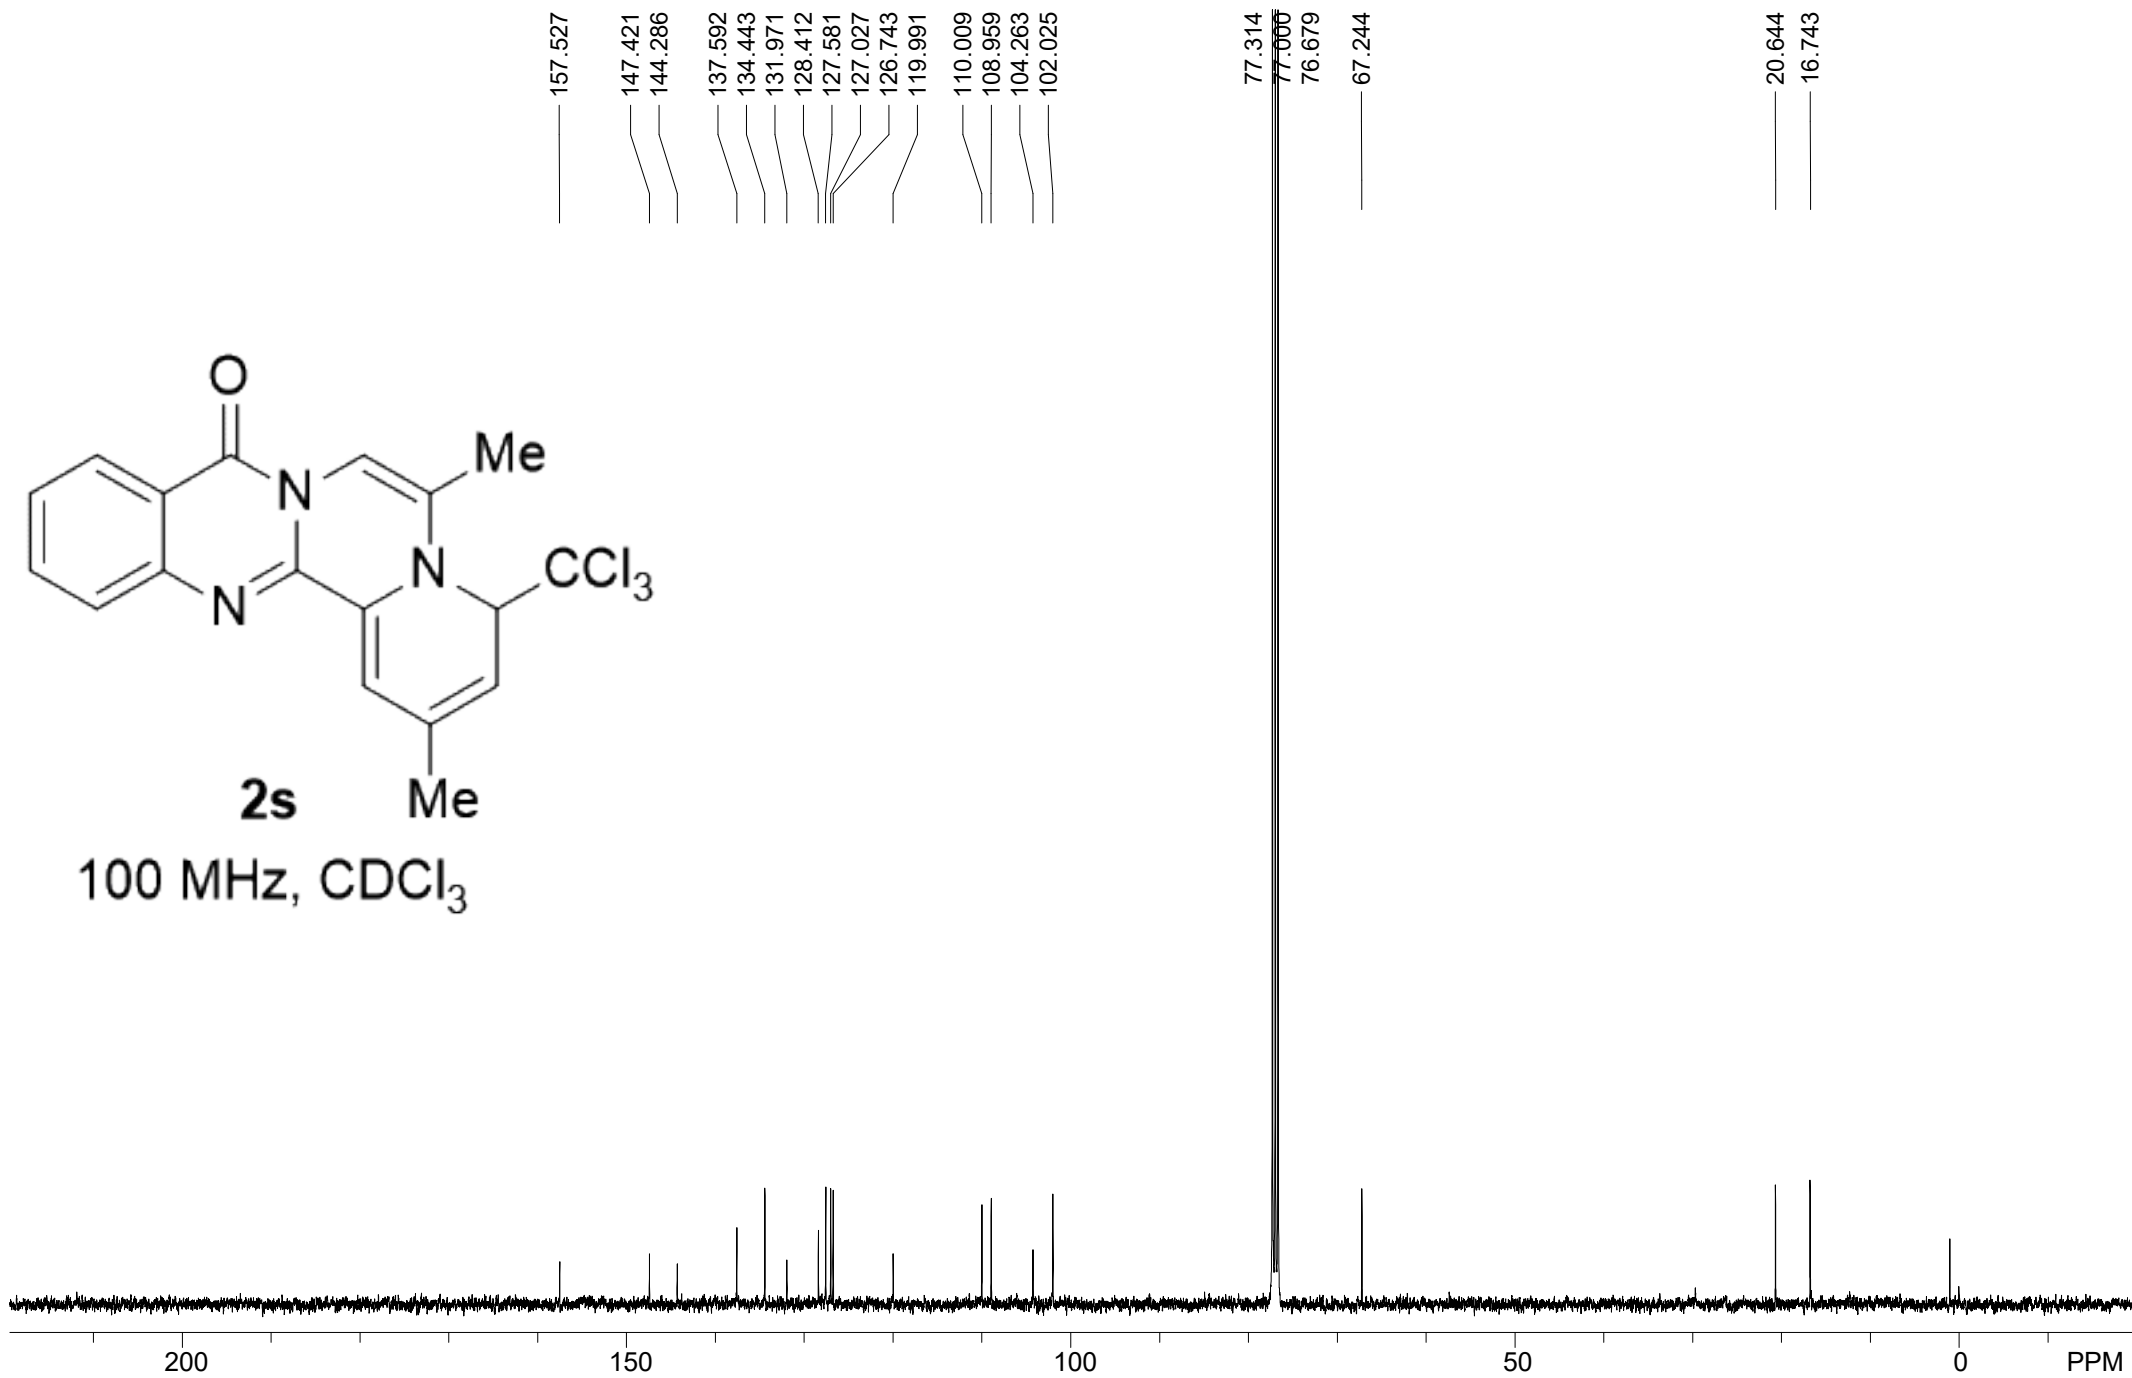

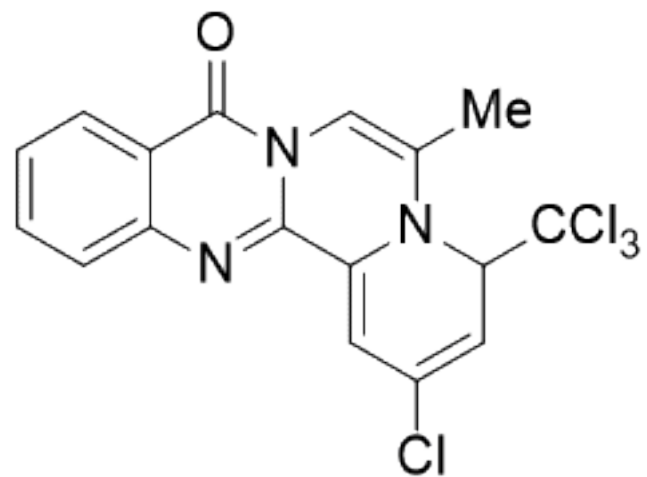

**2t**  
400 MHz, CDCl<sub>3</sub>

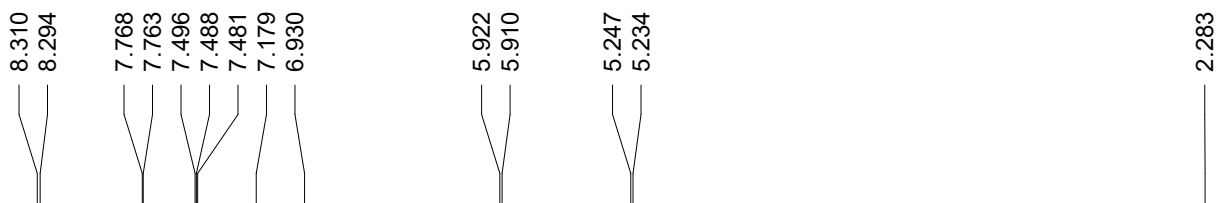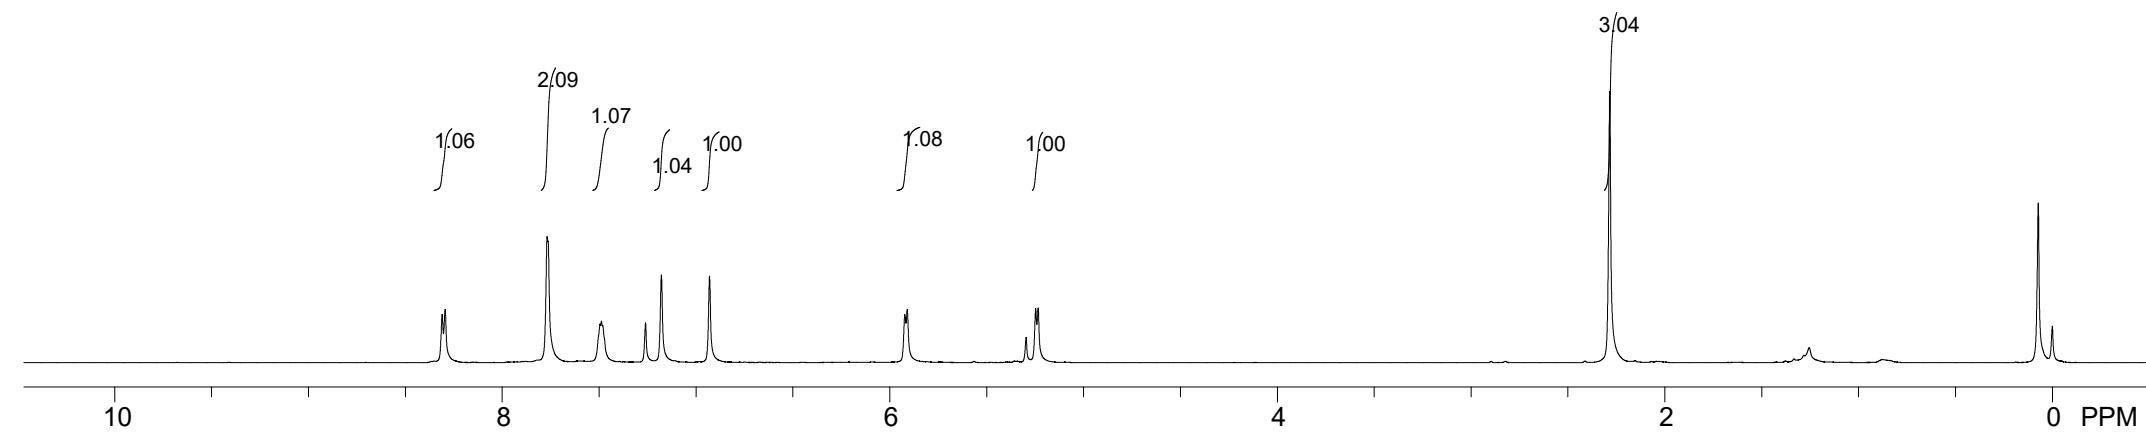

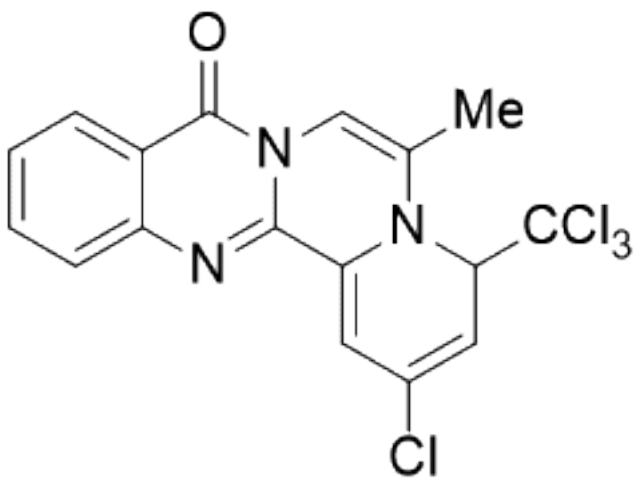

**2t**

100 MHz, CDCl<sub>3</sub>

157.262  
146.856  
143.000  
134.763  
134.731  
133.929  
127.643  
127.567  
127.295  
127.094  
119.927  
109.305  
106.932  
103.164  
103.055  
77.253  
77.000  
76.747  
68.109  
16.760

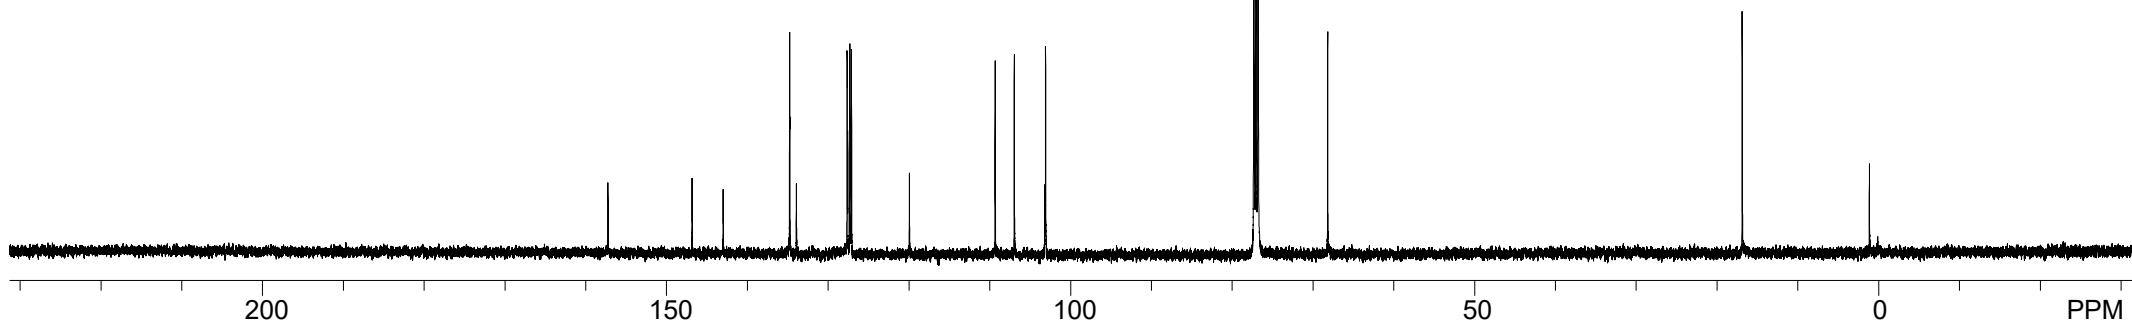

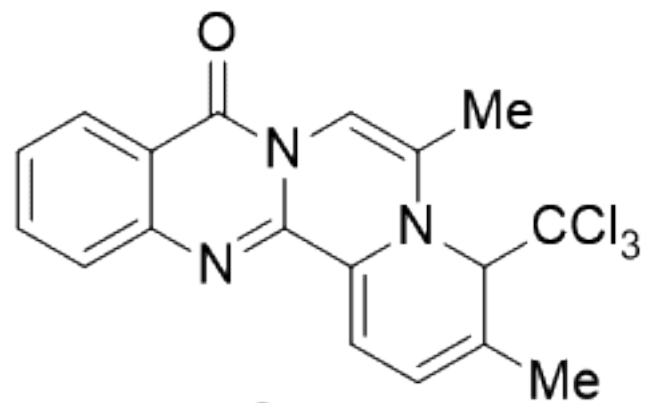

**2u**

400 MHz, CDCl<sub>3</sub>

8.286  
8.267  
7.817  
7.797  
7.764  
7.746  
7.728  
7.480  
7.462  
7.443  
7.039  
6.756  
6.702  
6.687

4.292  
4.276

2.184

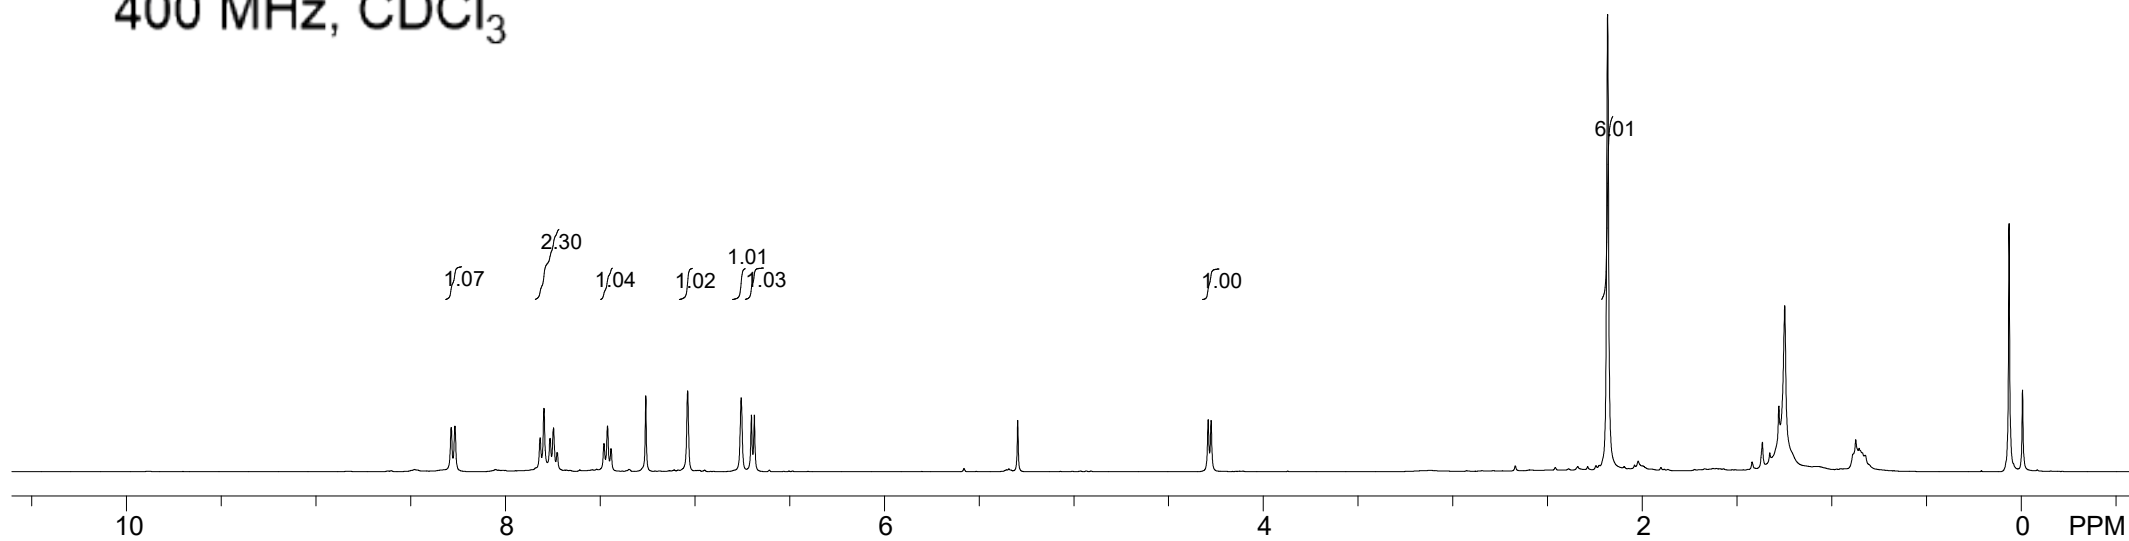



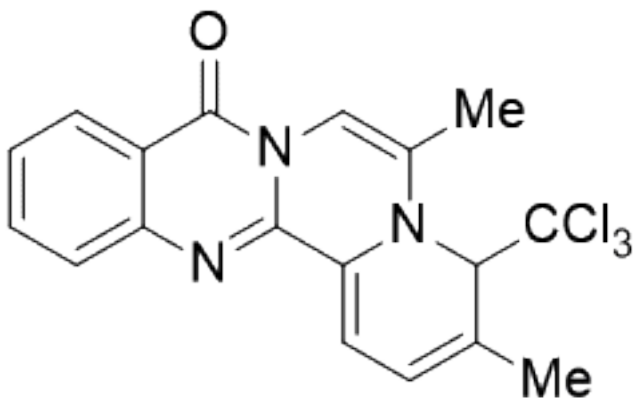

**2u**

100 MHz, CDCl<sub>3</sub>

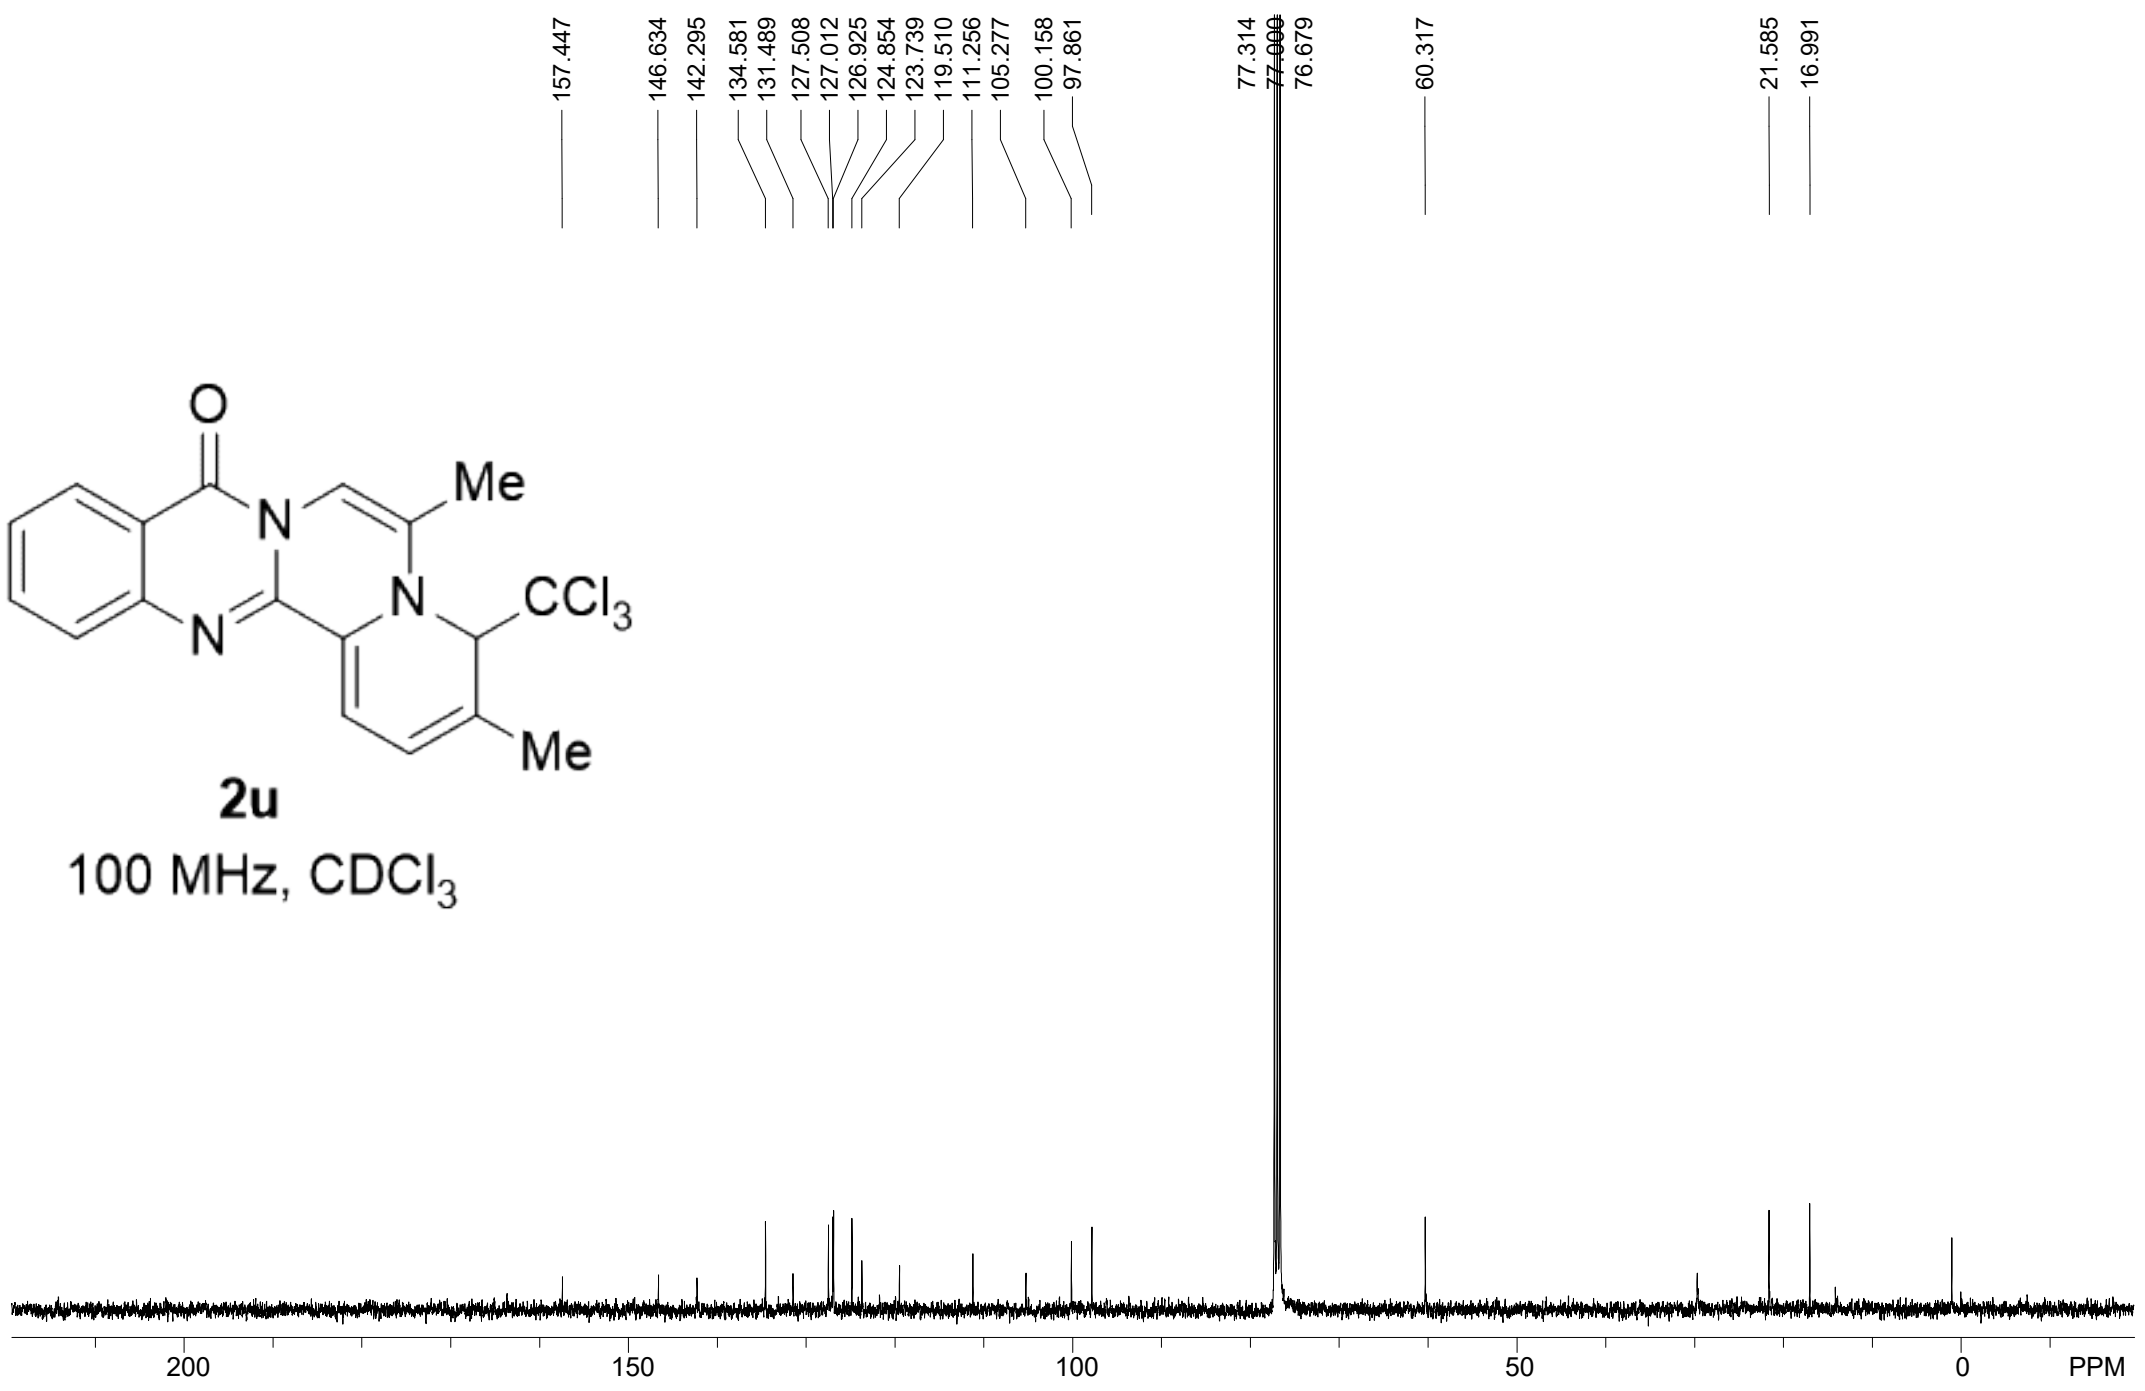

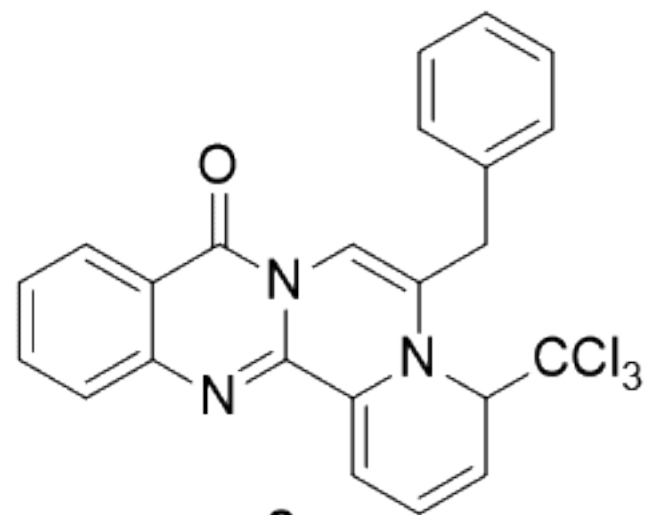

**2v**

400 MHz, CDCl<sub>3</sub>

8.323  
8.303  
7.798  
7.777  
7.757  
7.737  
7.498  
7.495  
7.479  
7.462  
7.350  
7.333  
7.315  
7.289  
7.271  
7.228  
7.210  
6.974  
6.959  
6.597  
6.582  
6.575  
6.559  
5.554  
5.536  
5.531  
5.514  
5.074  
5.059  
4.128  
4.085  
3.950  
3.907

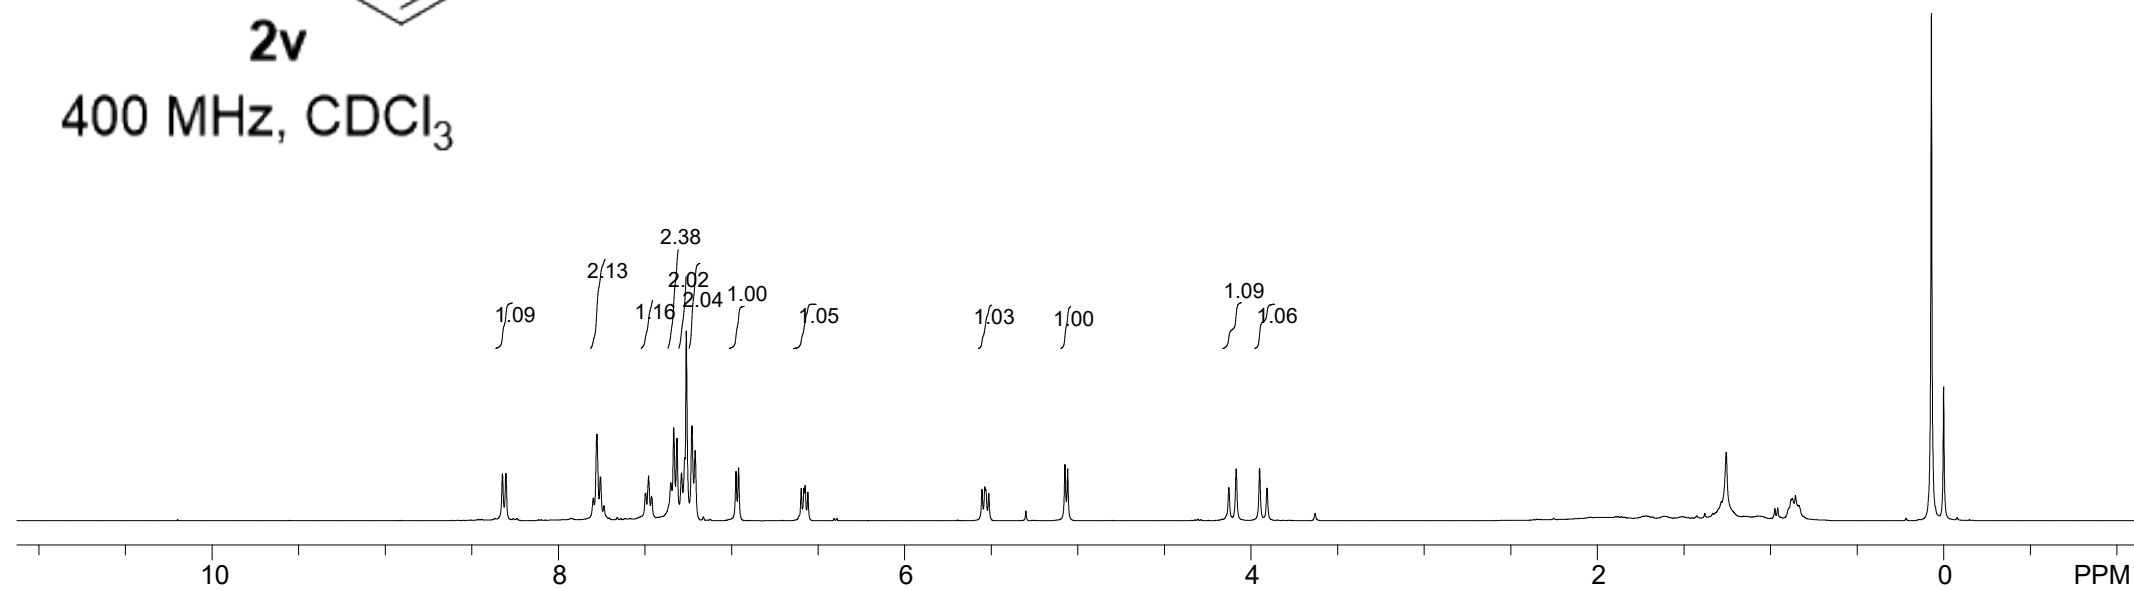

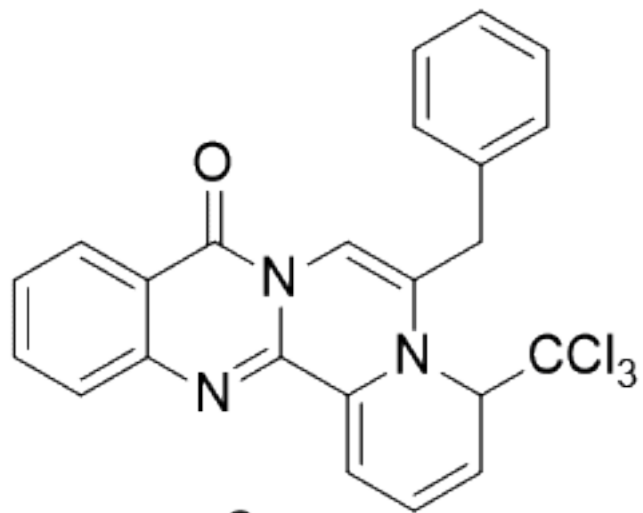

**2v**

100 MHz, CDCl<sub>3</sub>

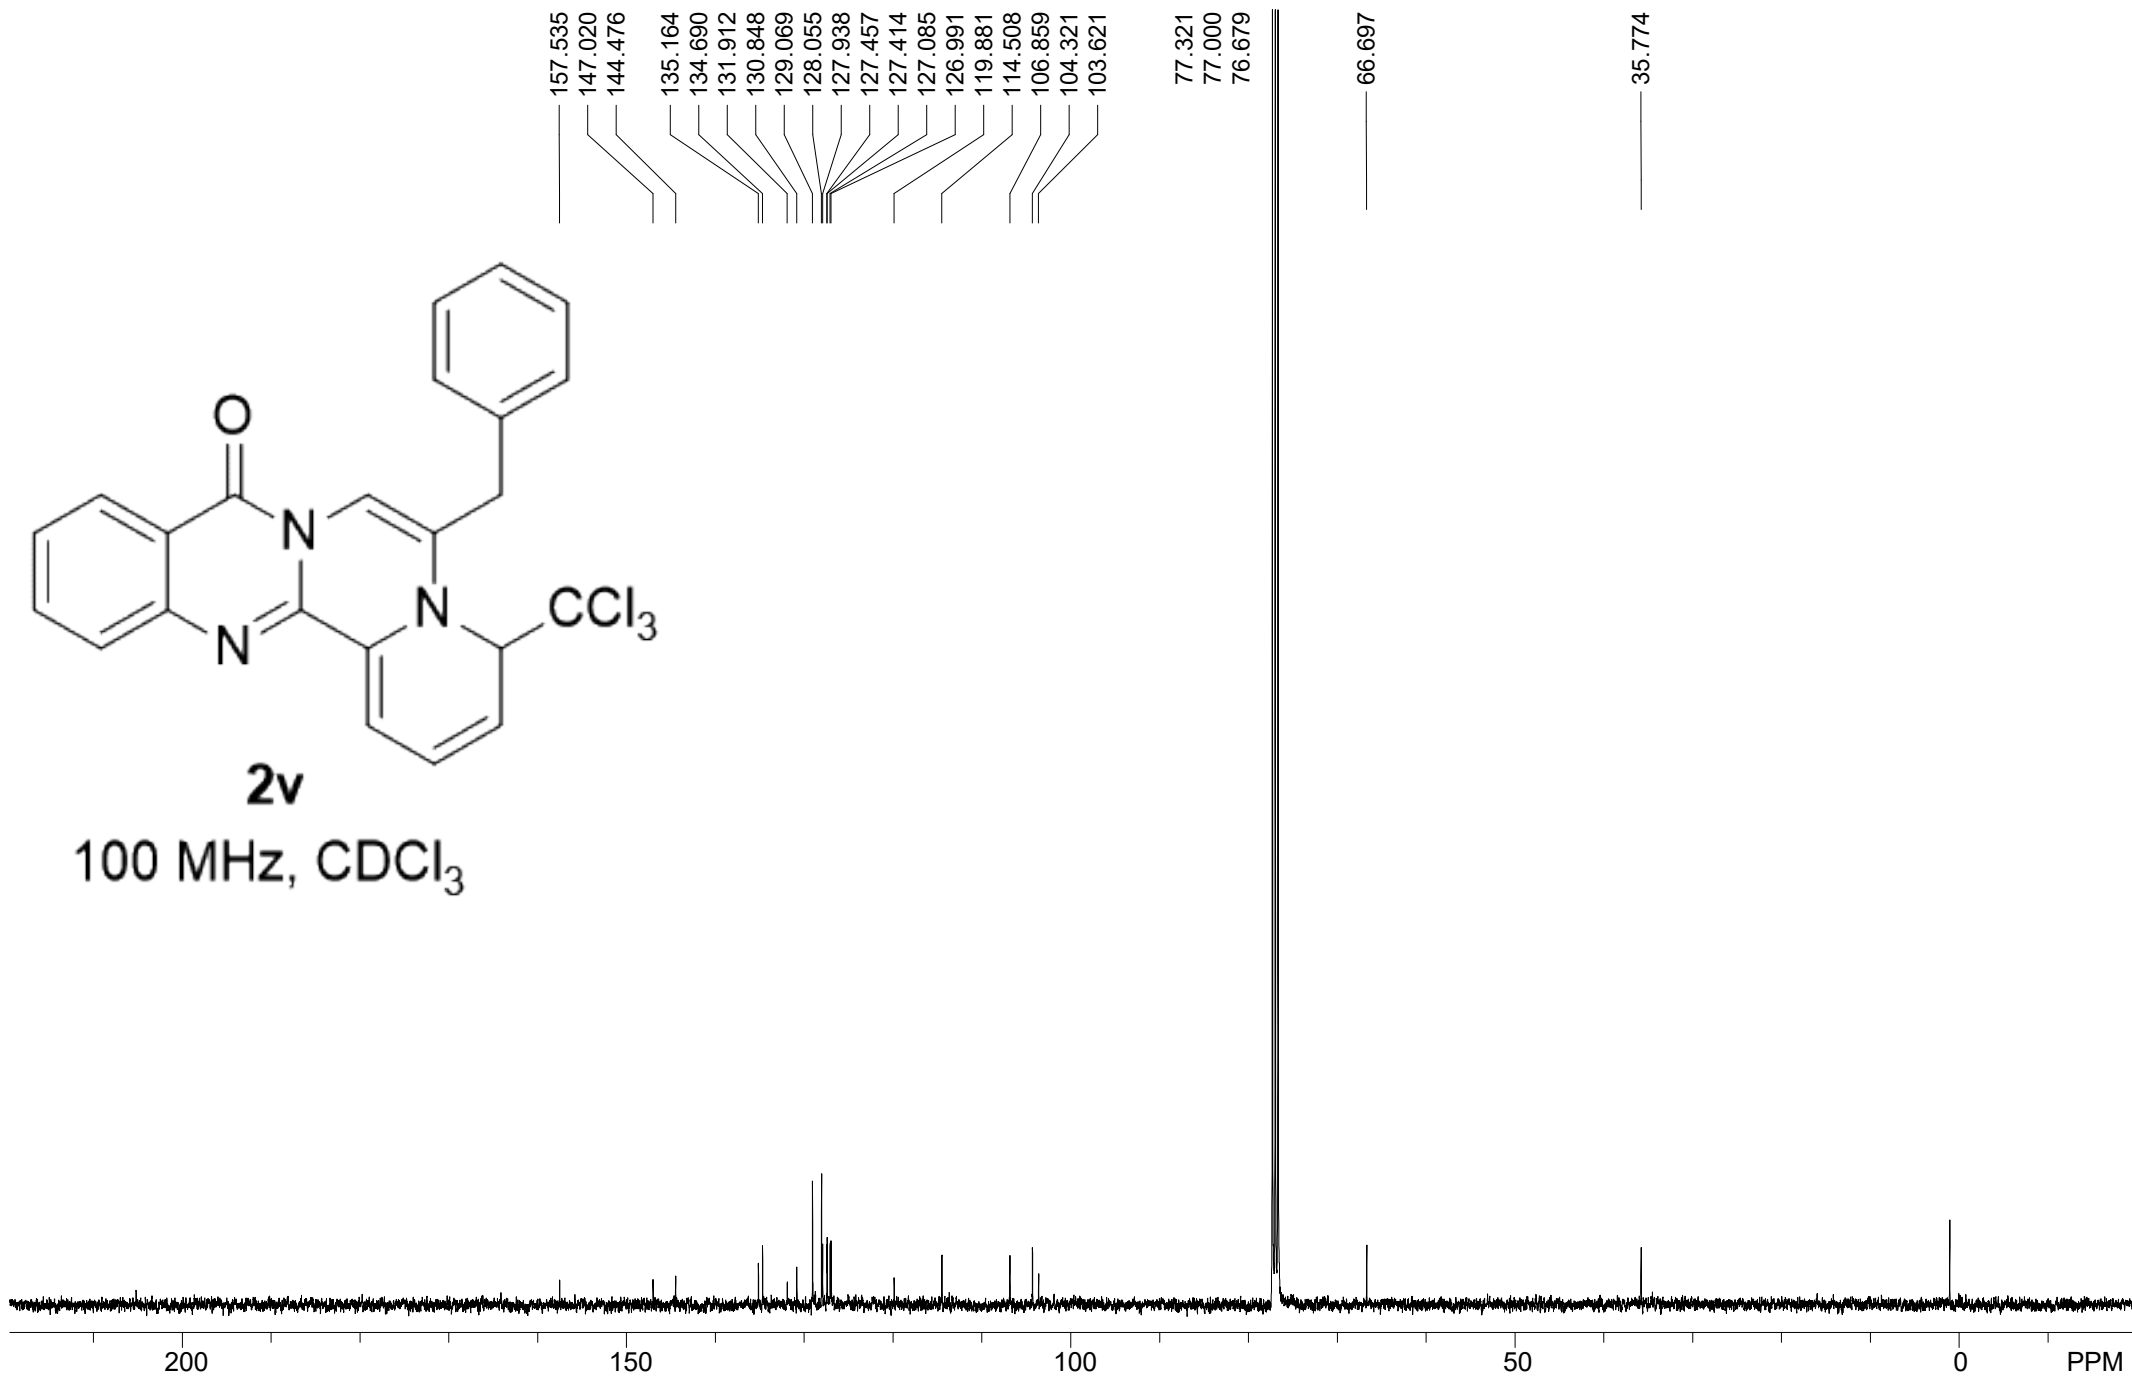

8.317  
8.297  
7.756  
7.746  
7.489  
7.479  
7.469  
7.460  
7.449  
7.260  
7.232  
7.138  
7.118  
7.102  
7.082  
6.938  
6.923  
6.601  
6.585  
6.578  
6.563  
5.571  
5.554  
5.548  
5.532  
5.095  
5.079  
4.076  
4.033  
3.899  
3.857  
2.329

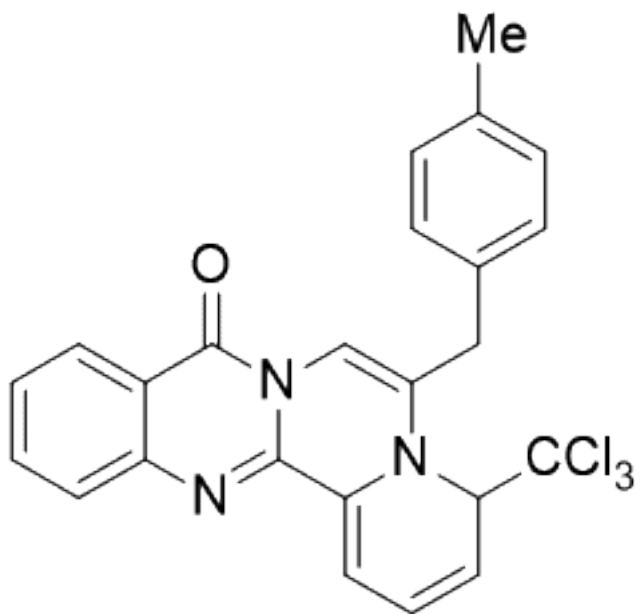

**2w**

400 MHz, CDCl<sub>3</sub>

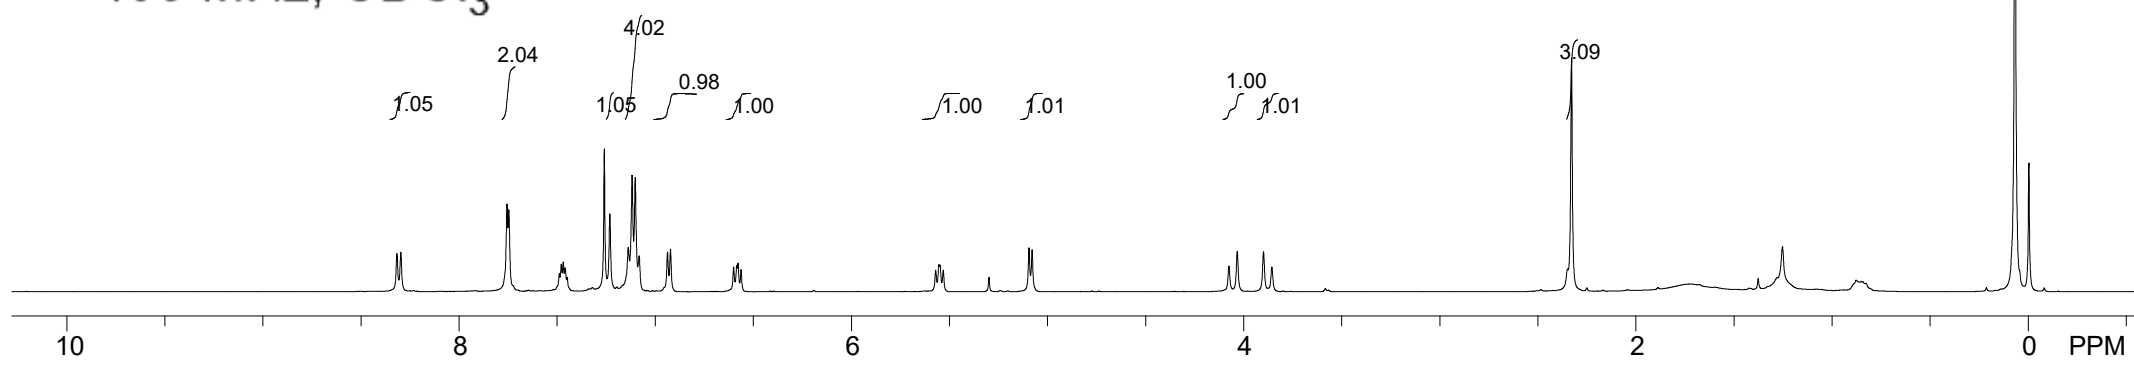

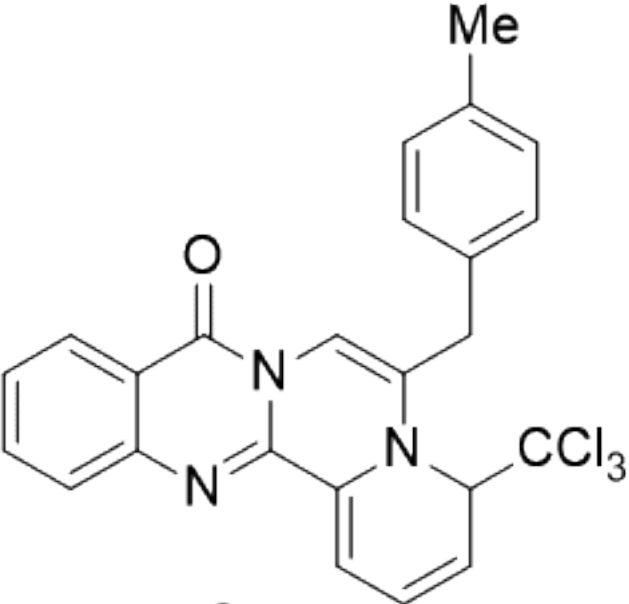

**2w**  
100 MHz, CDCl<sub>3</sub>

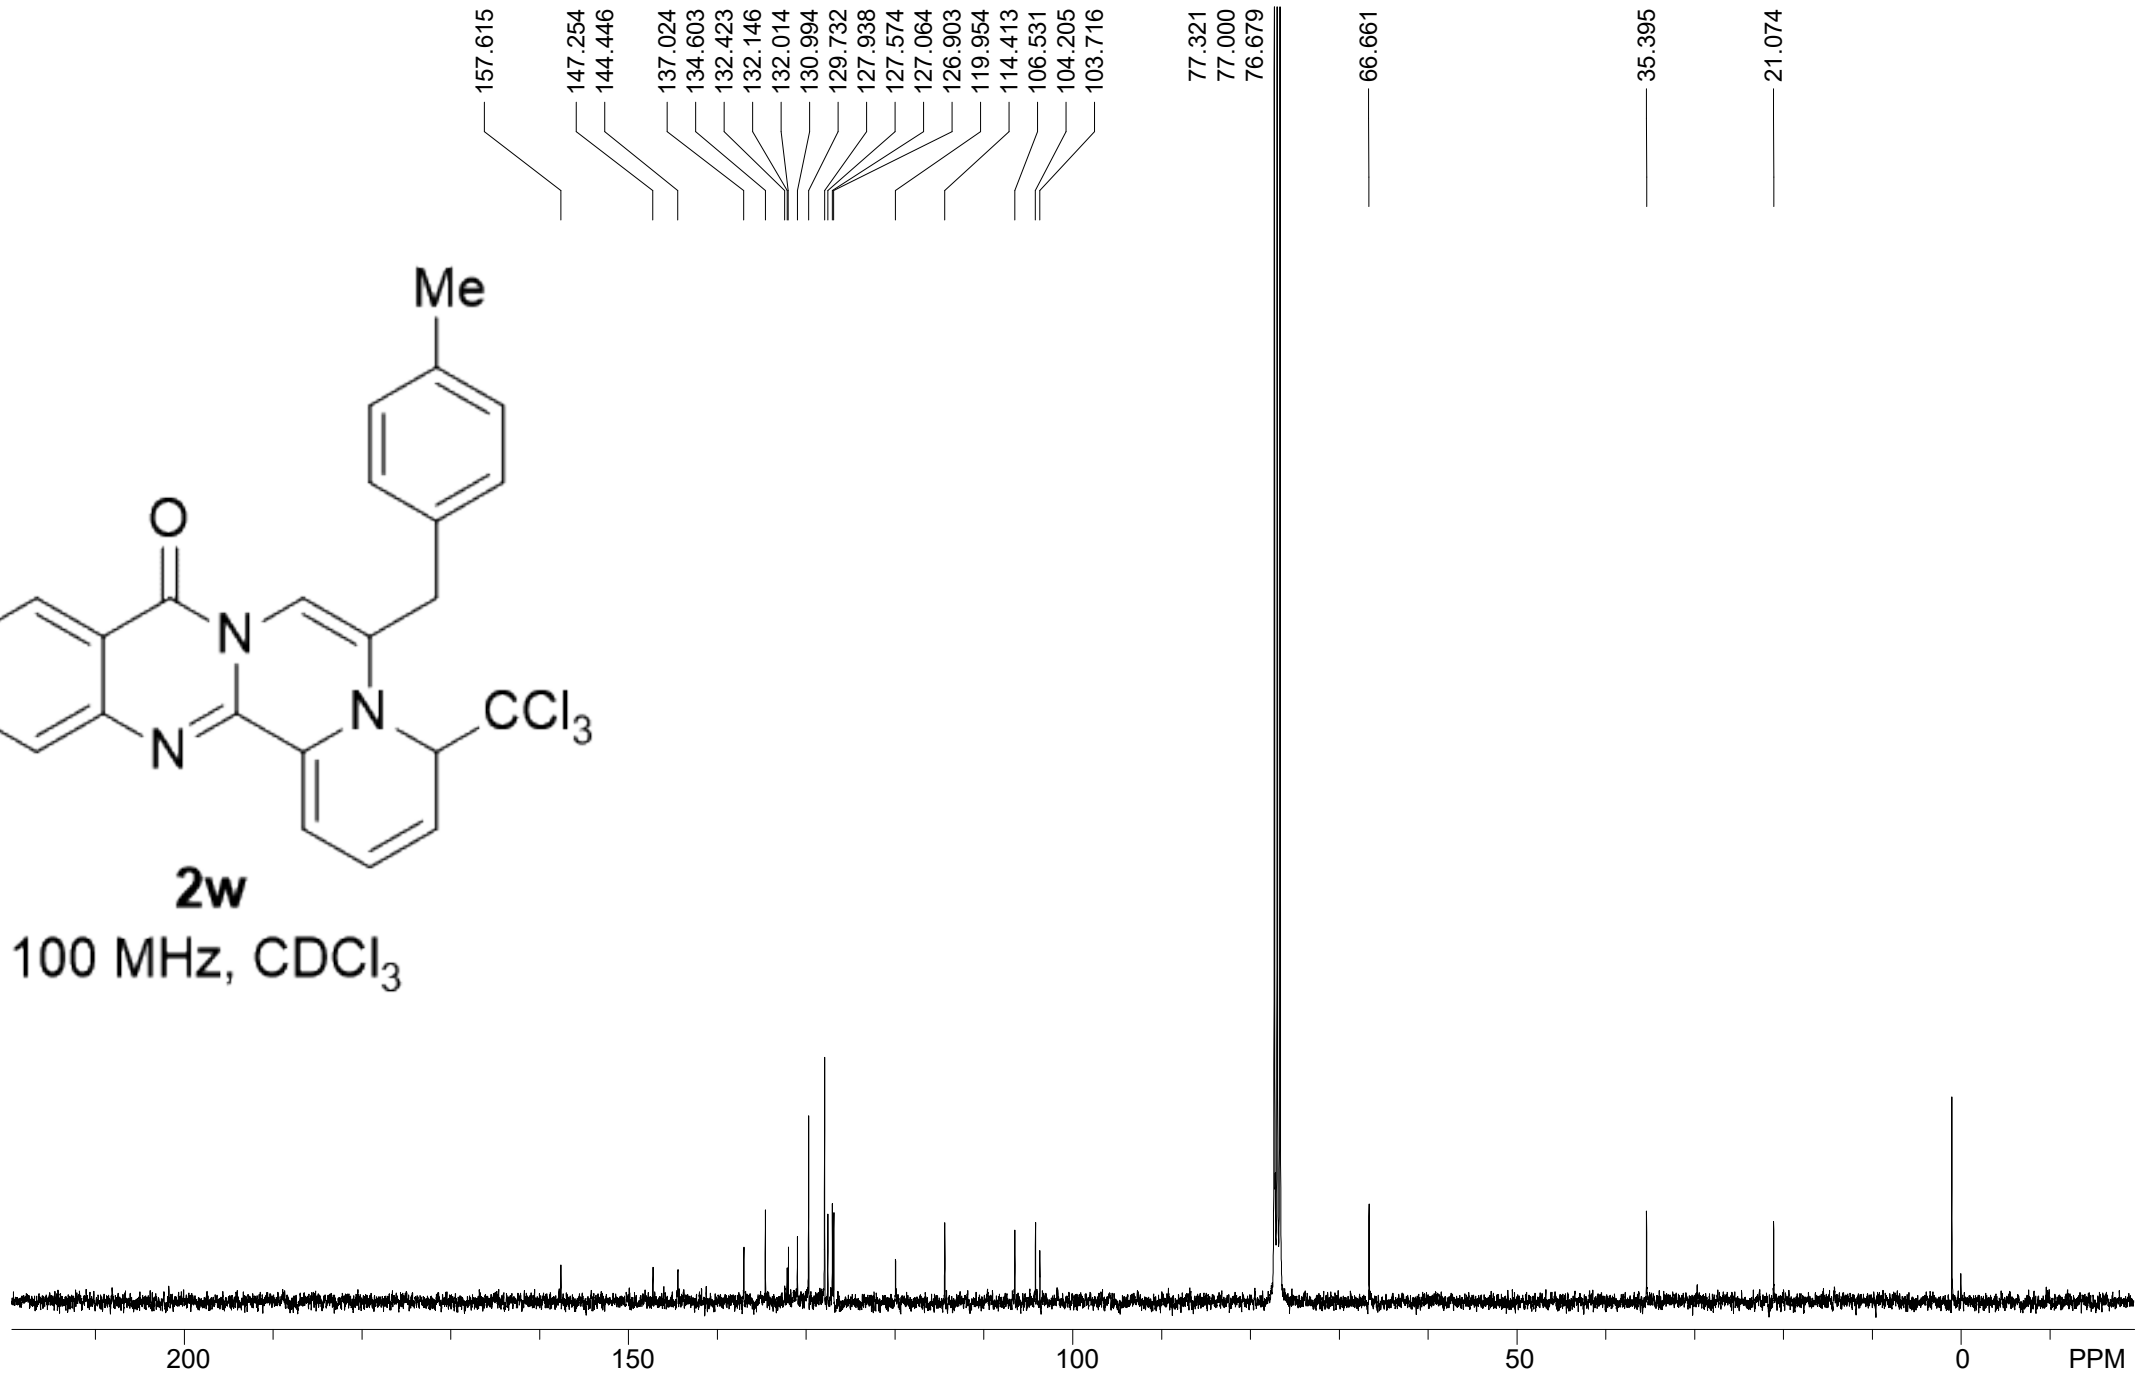

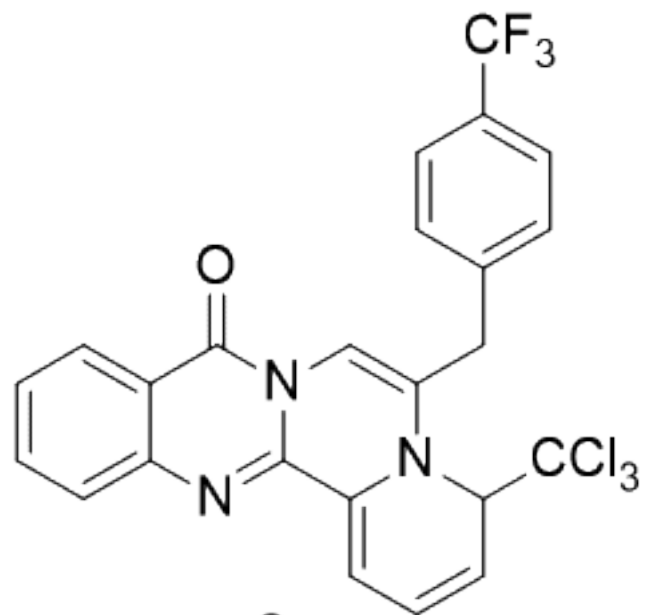

2x

400 MHz, CDCl<sub>3</sub>

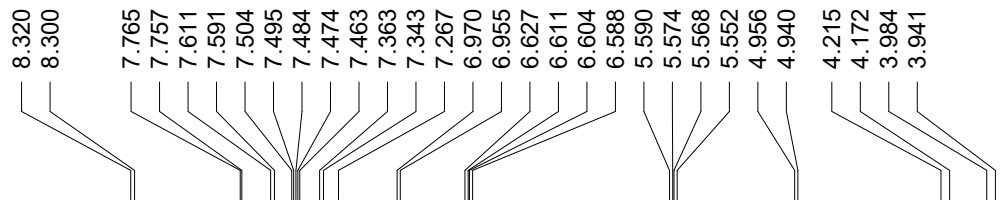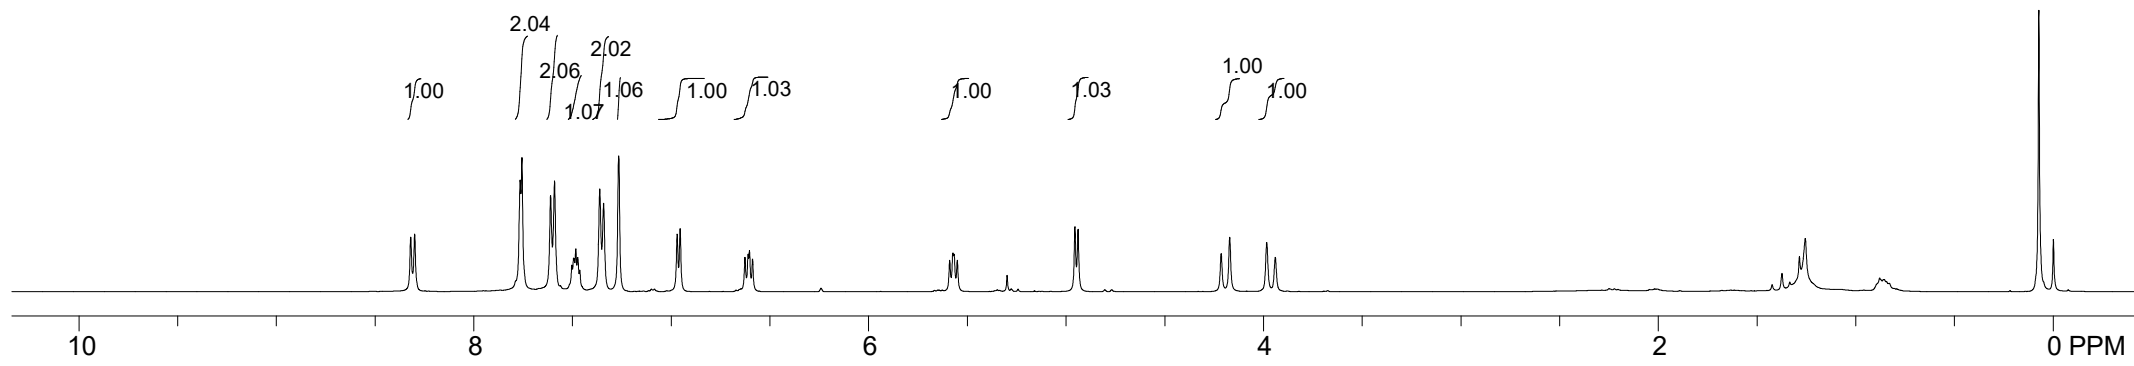

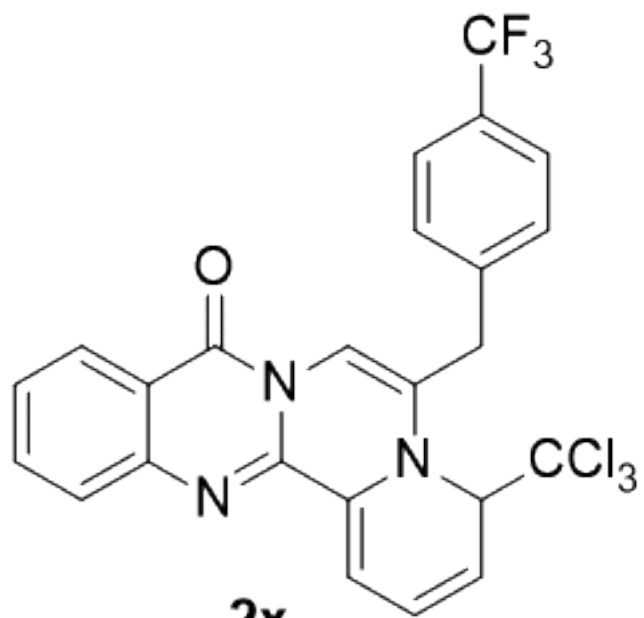

2x

100 MHz,  $CDCl_3$

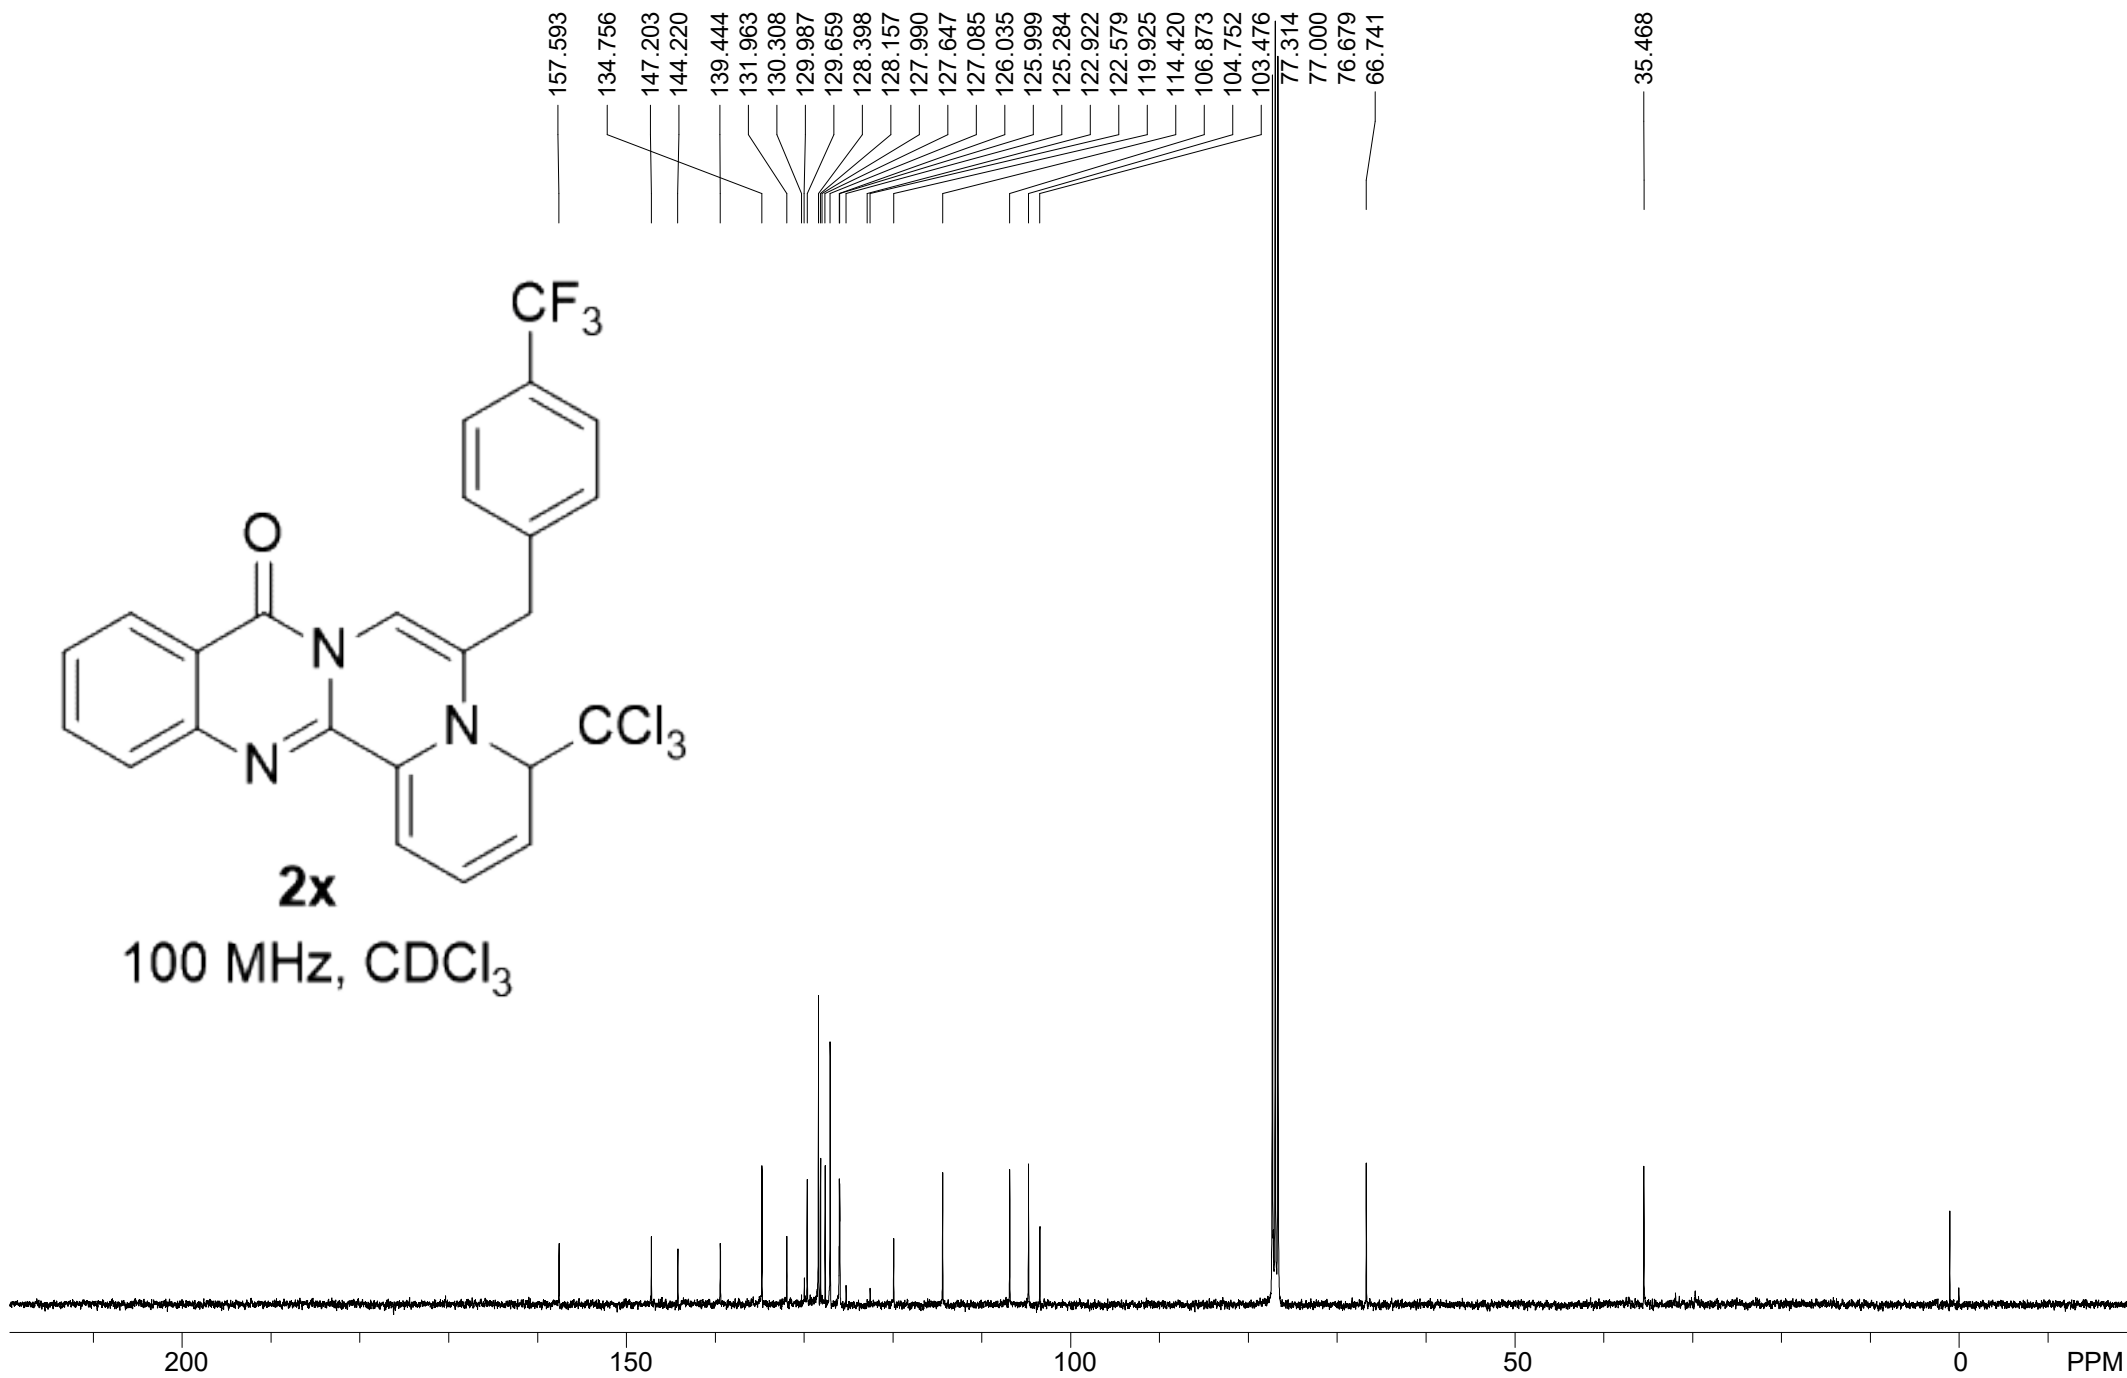

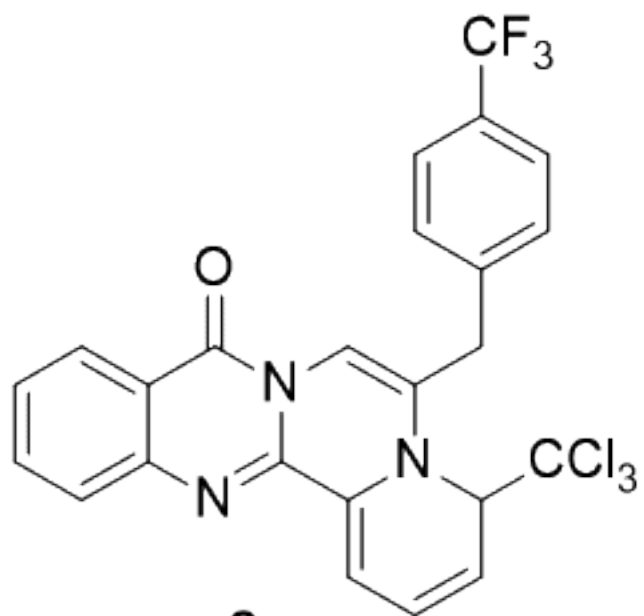

**2x**

376 MHz, CDCl<sub>3</sub>

62.507

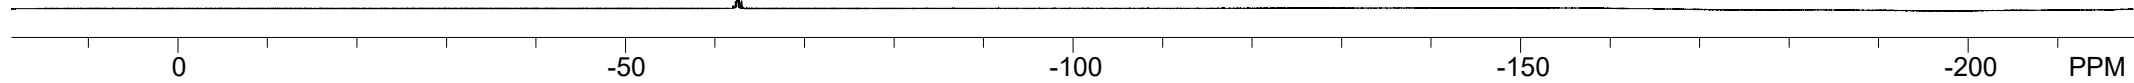



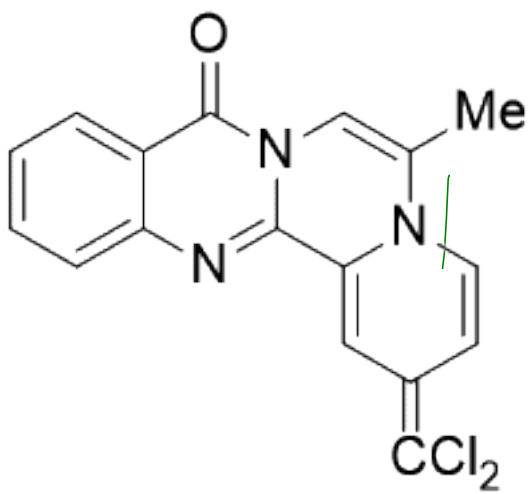

8.351  
8.335  
7.790  
7.788  
7.777  
7.774  
7.765  
7.763  
7.752  
7.739  
7.717  
7.599  
7.592  
7.438  
7.425  
7.414  
7.172  
7.030  
7.023

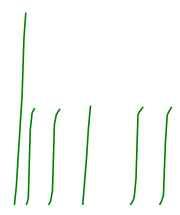

2.641

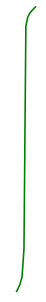

2aa

600 MHz, CDCl<sub>3</sub>

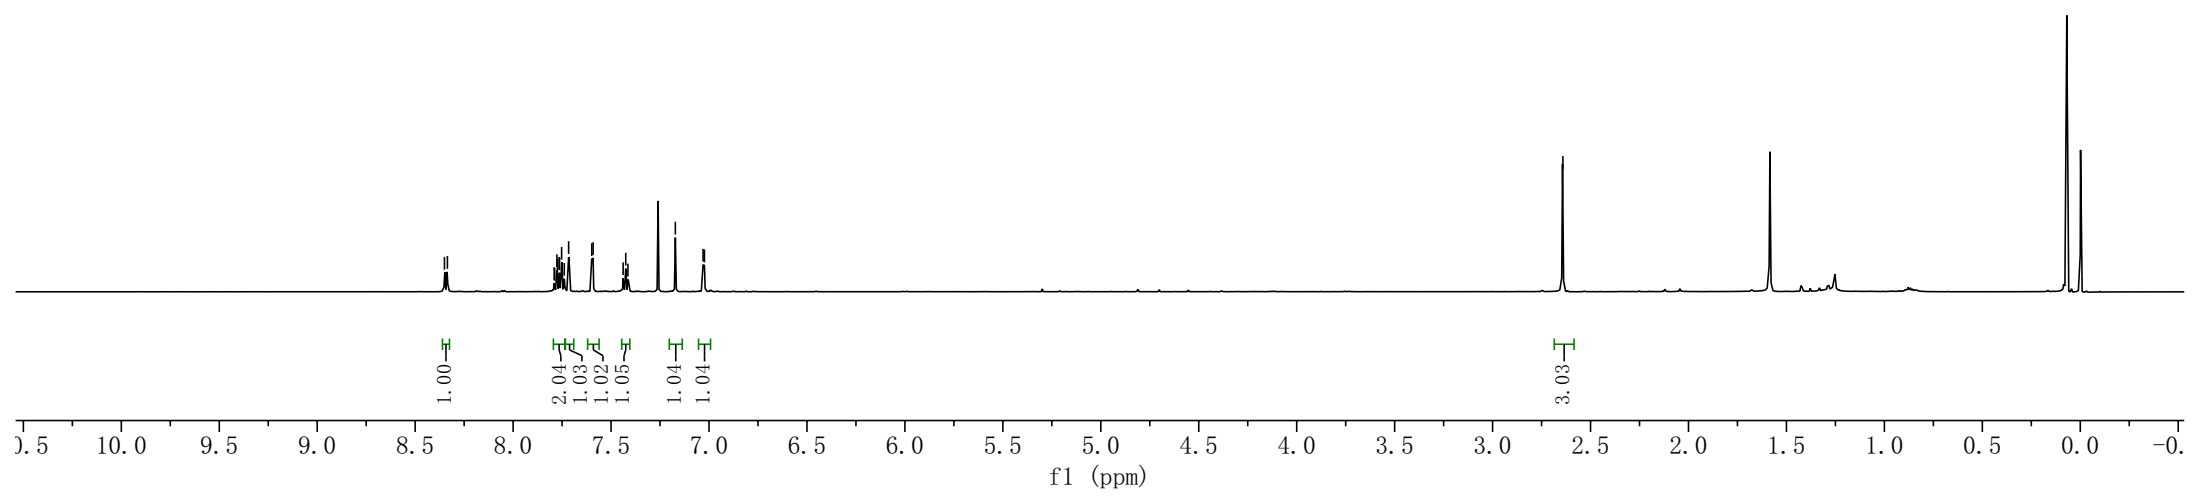

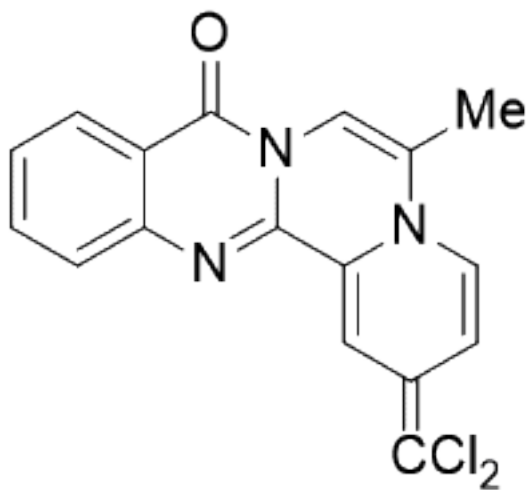

**2aa**

150 MHz, CDCl<sub>3</sub>

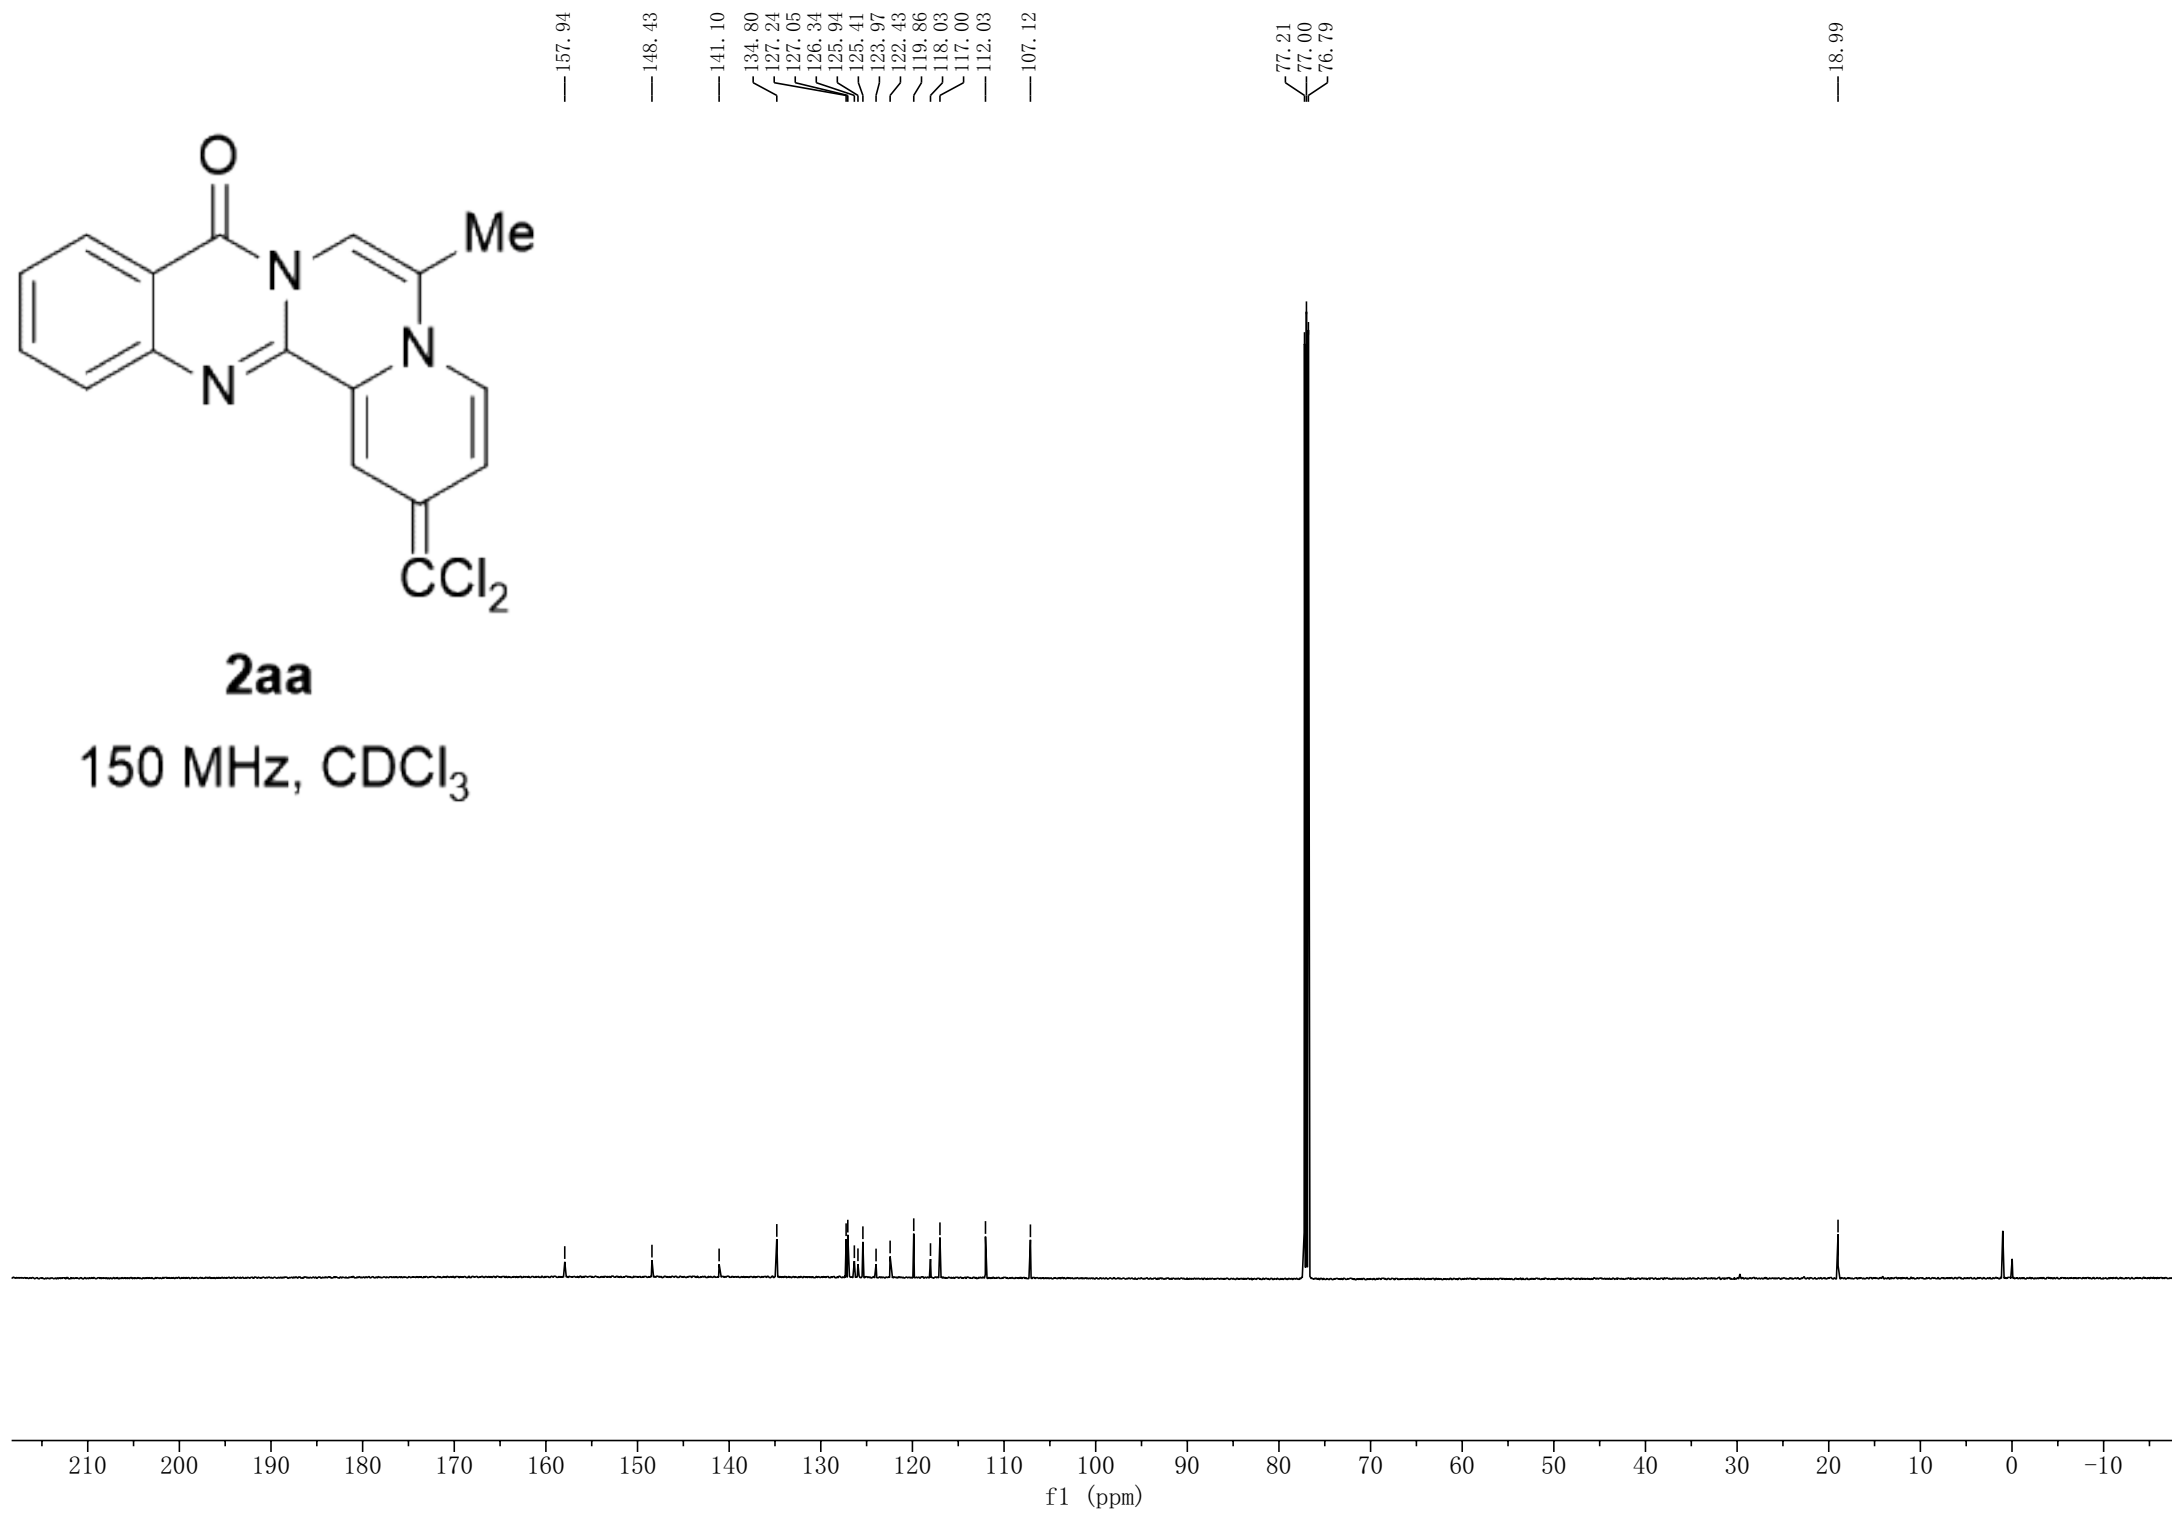

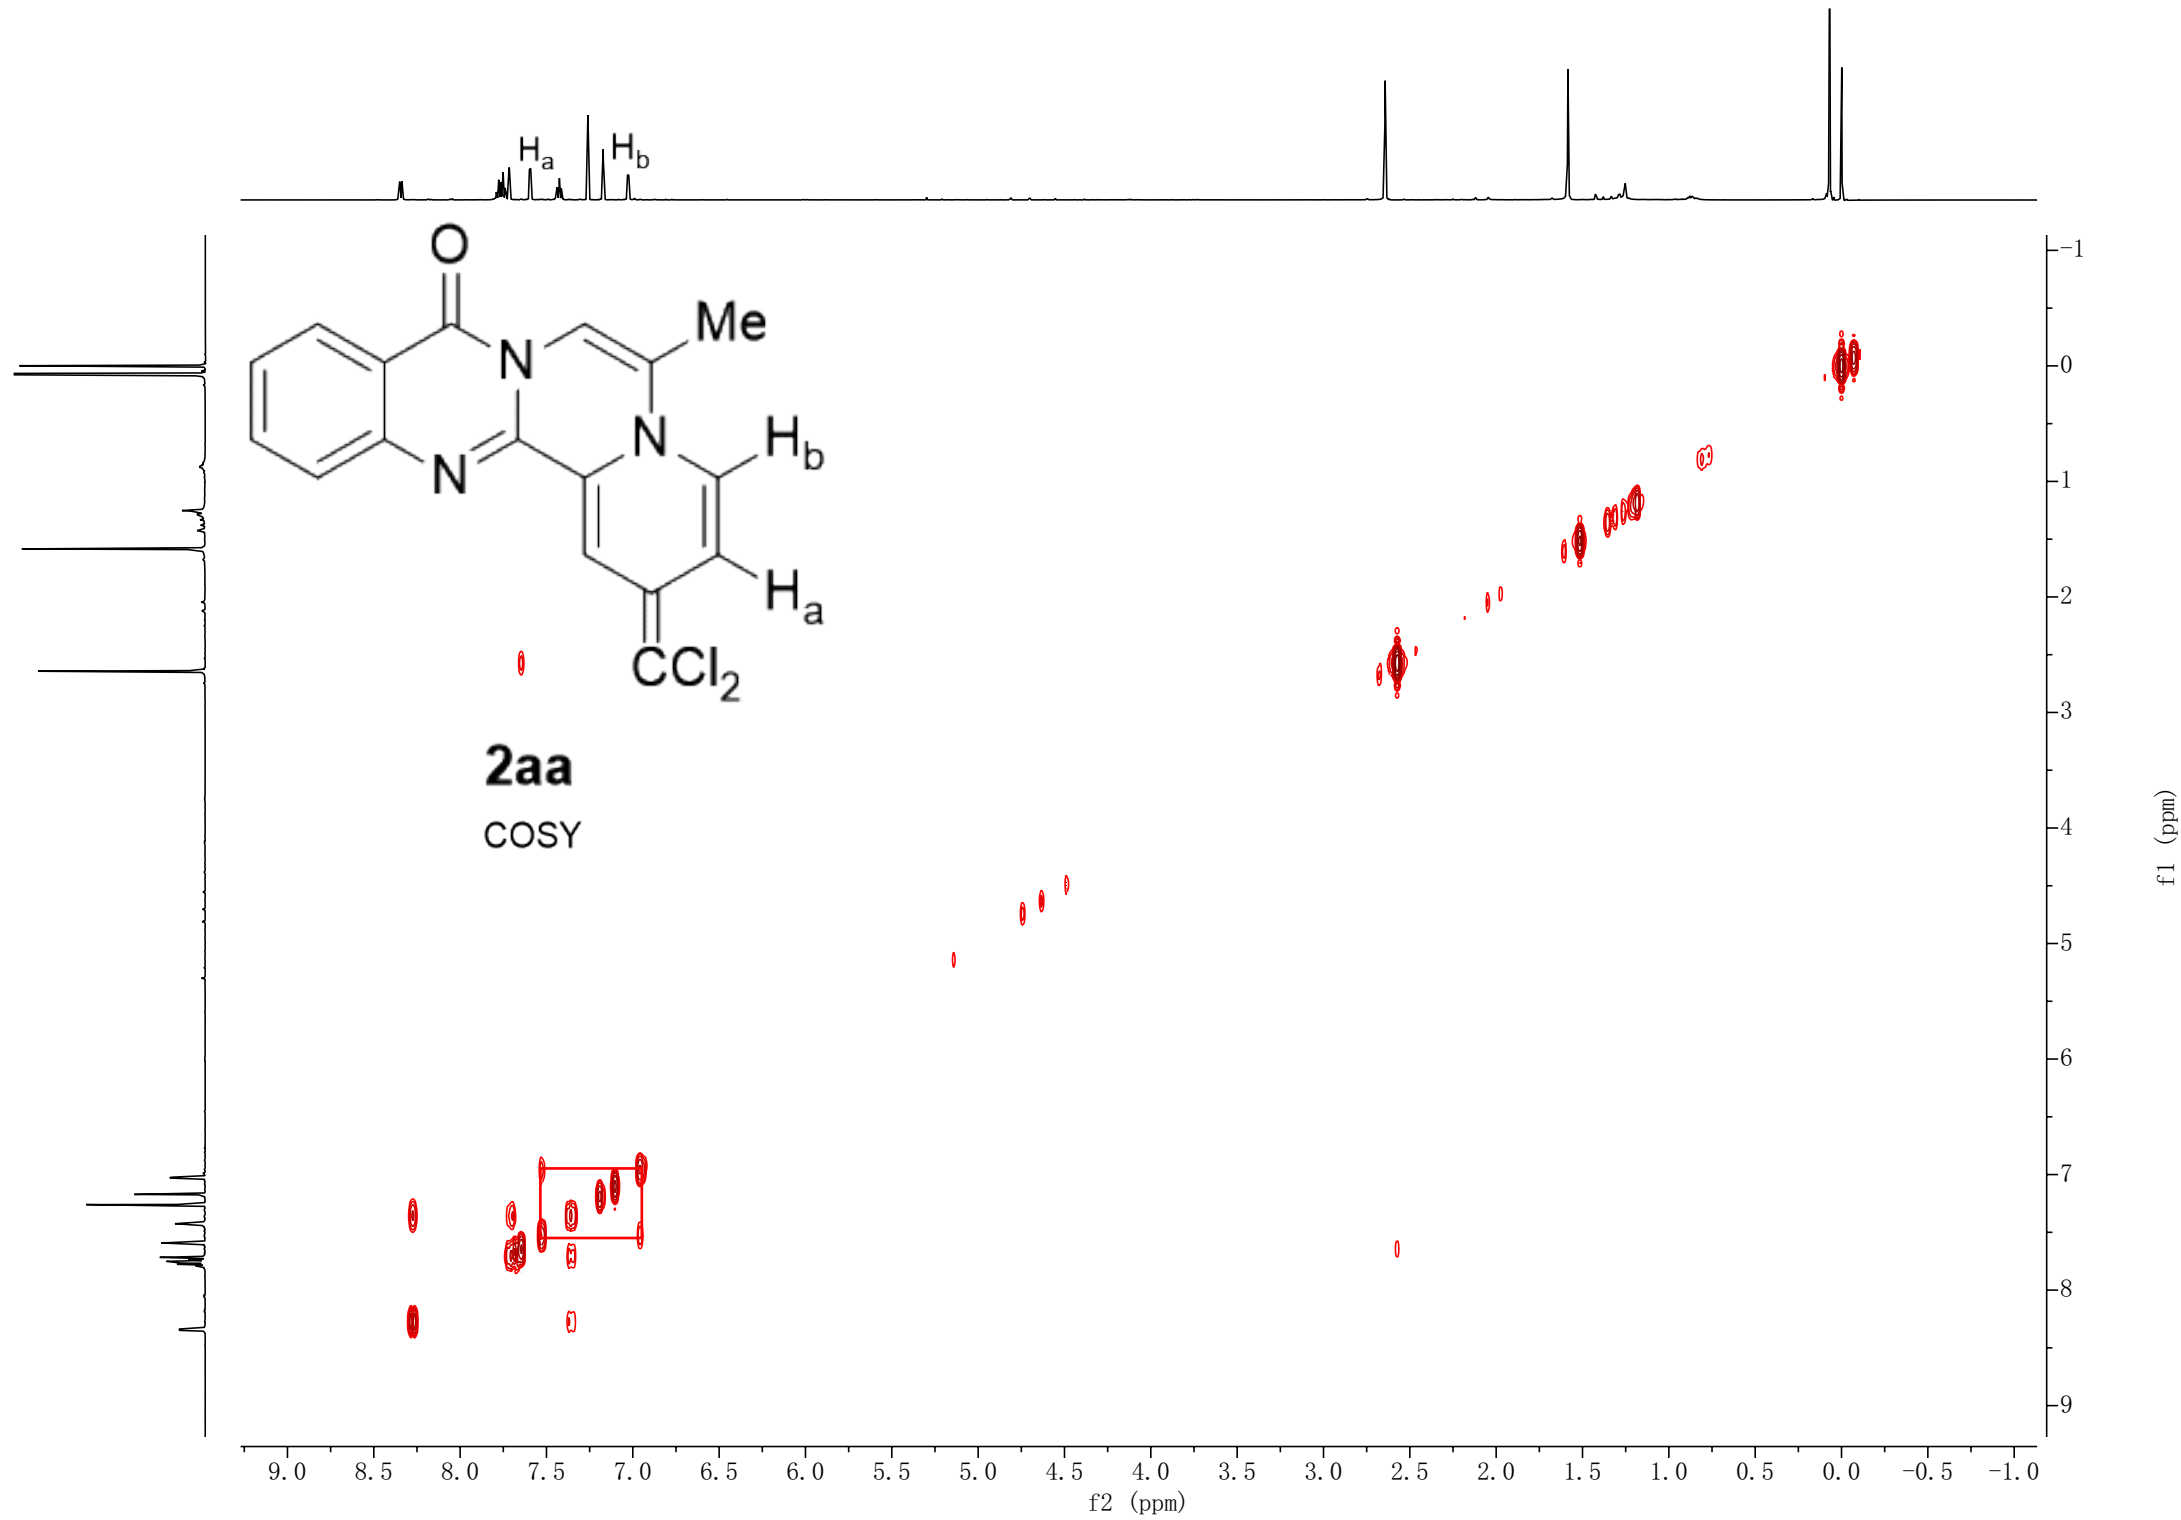

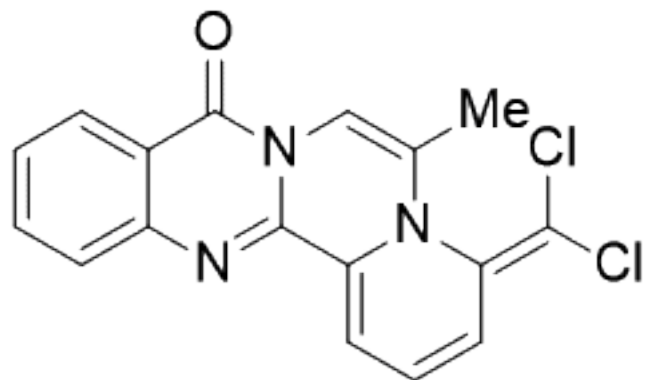

**3a**

500 MHz, CDCl<sub>3</sub>

8.320  
8.305  
7.770  
7.756  
7.740  
7.707  
7.691  
7.492  
7.477  
7.462  
7.172  
7.020  
7.007  
6.742  
6.723  
6.524  
6.511  
6.504  
6.492

2.115

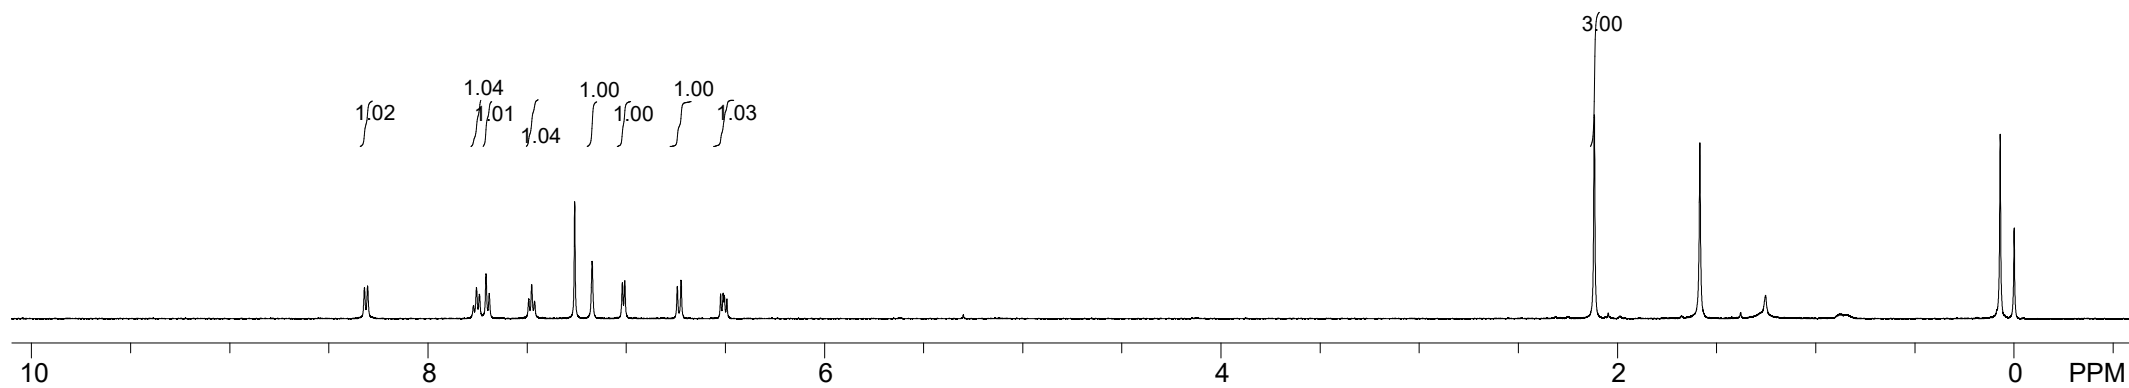

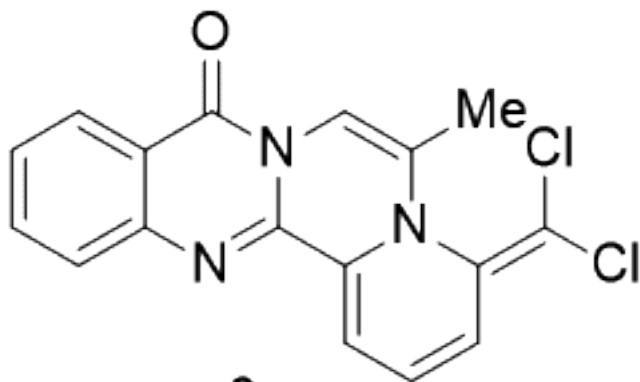

**3a**

125 MHz, CDCl<sub>3</sub>

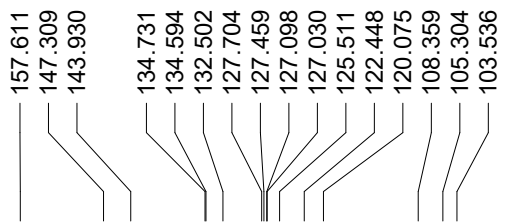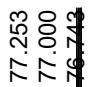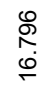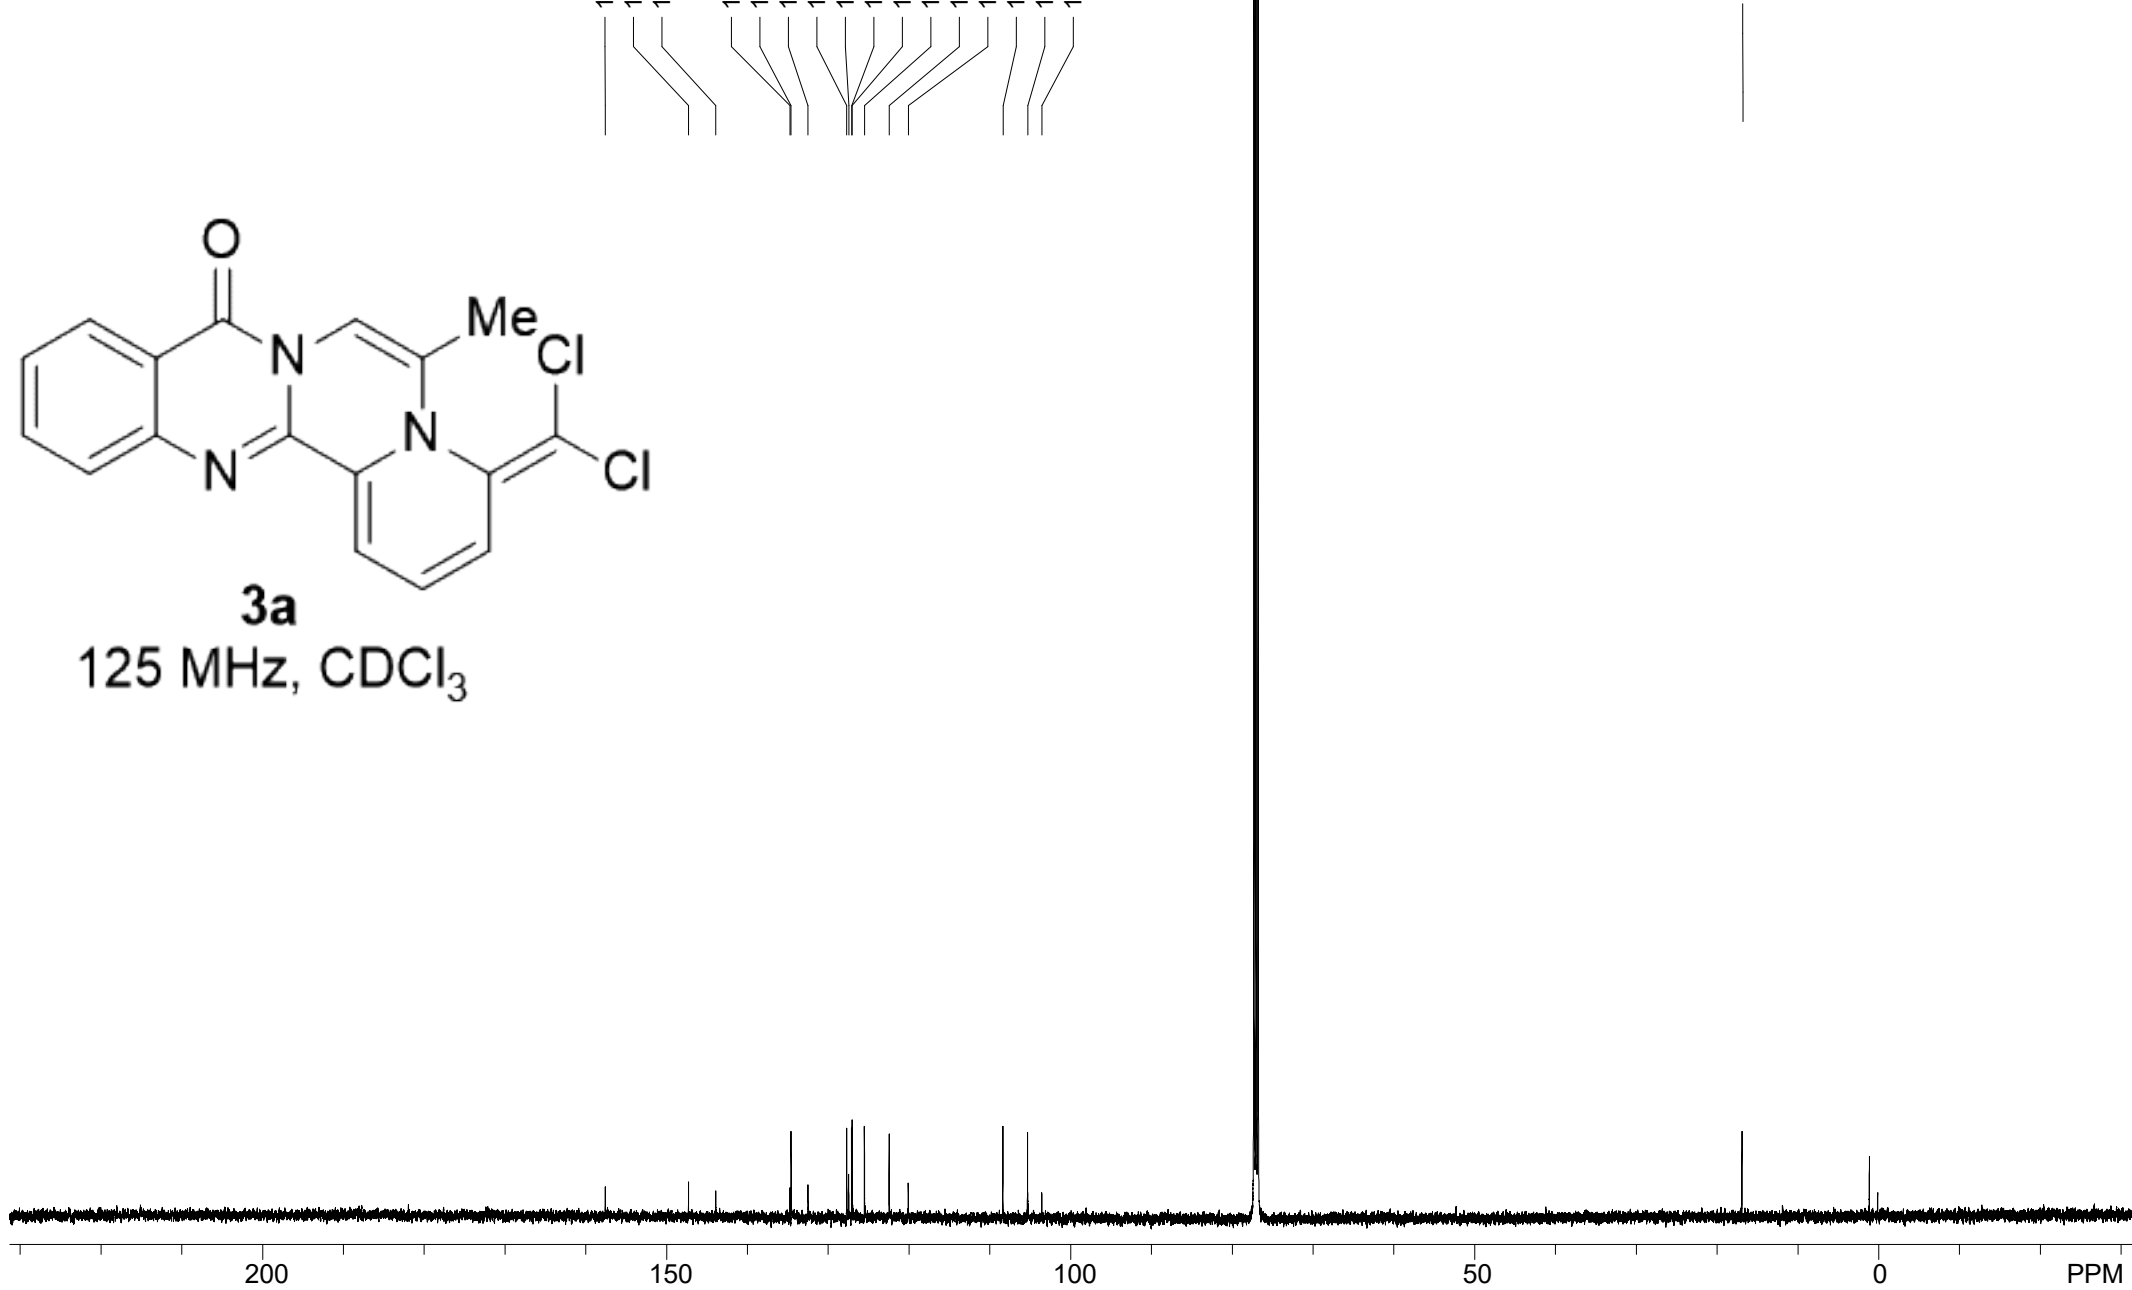

8.267  
8.251  
7.696  
7.688  
7.435  
7.427  
7.420  
7.412  
7.403  
6.801  
6.526

4.609  
4.599

2.896  
2.880  
2.866  
2.851  
2.771  
2.765  
2.755  
2.746  
2.739  
2.731  
2.725  
2.716  
2.707  
2.700  
2.690  
2.684  
2.503  
2.490  
2.478  
2.464  
2.450  
2.438  
2.172  
2.077  
2.063  
2.050  
2.037  
2.023  
2.010  
1.997

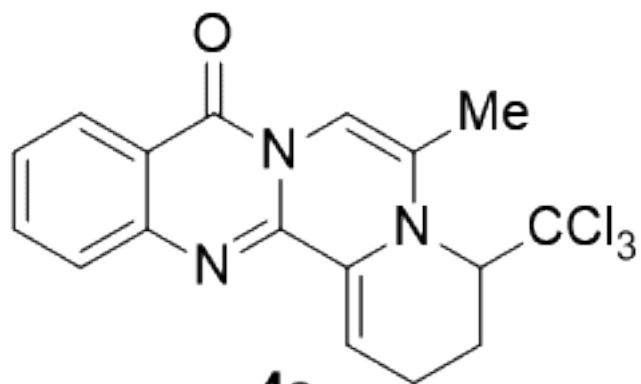

**4a**

500 MHz, CDCl<sub>3</sub>

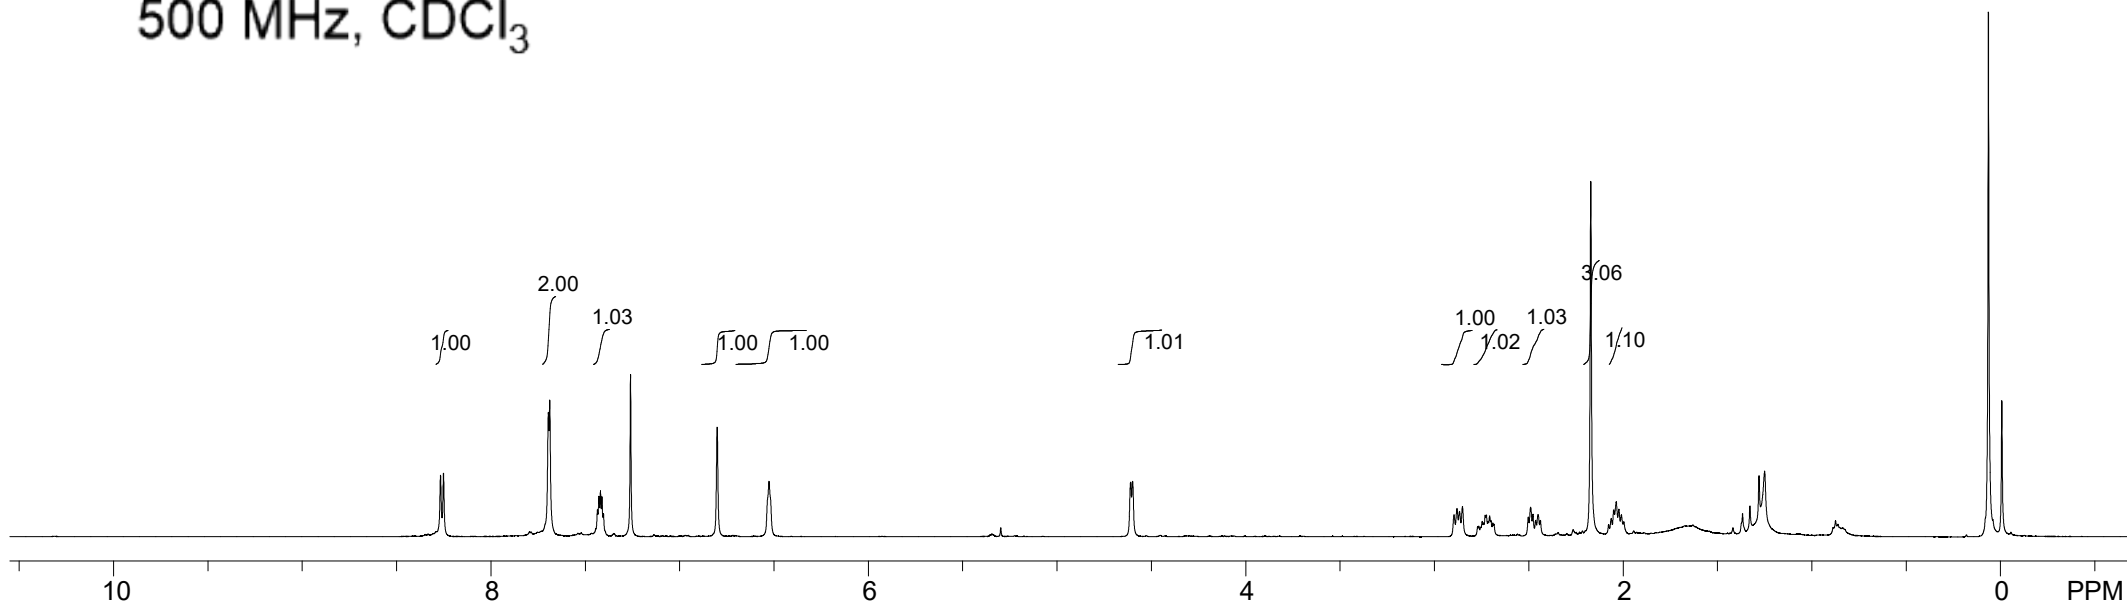

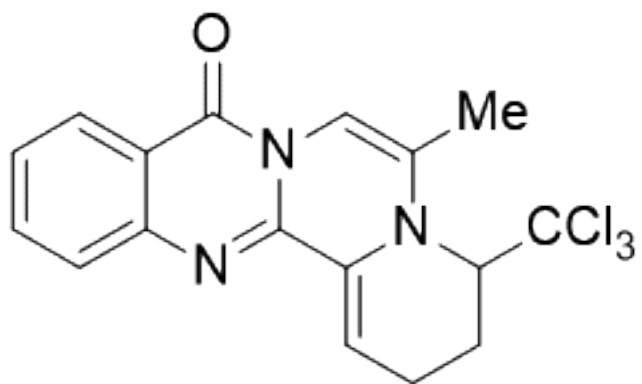

**4a**

125 MHz, CDCl<sub>3</sub>

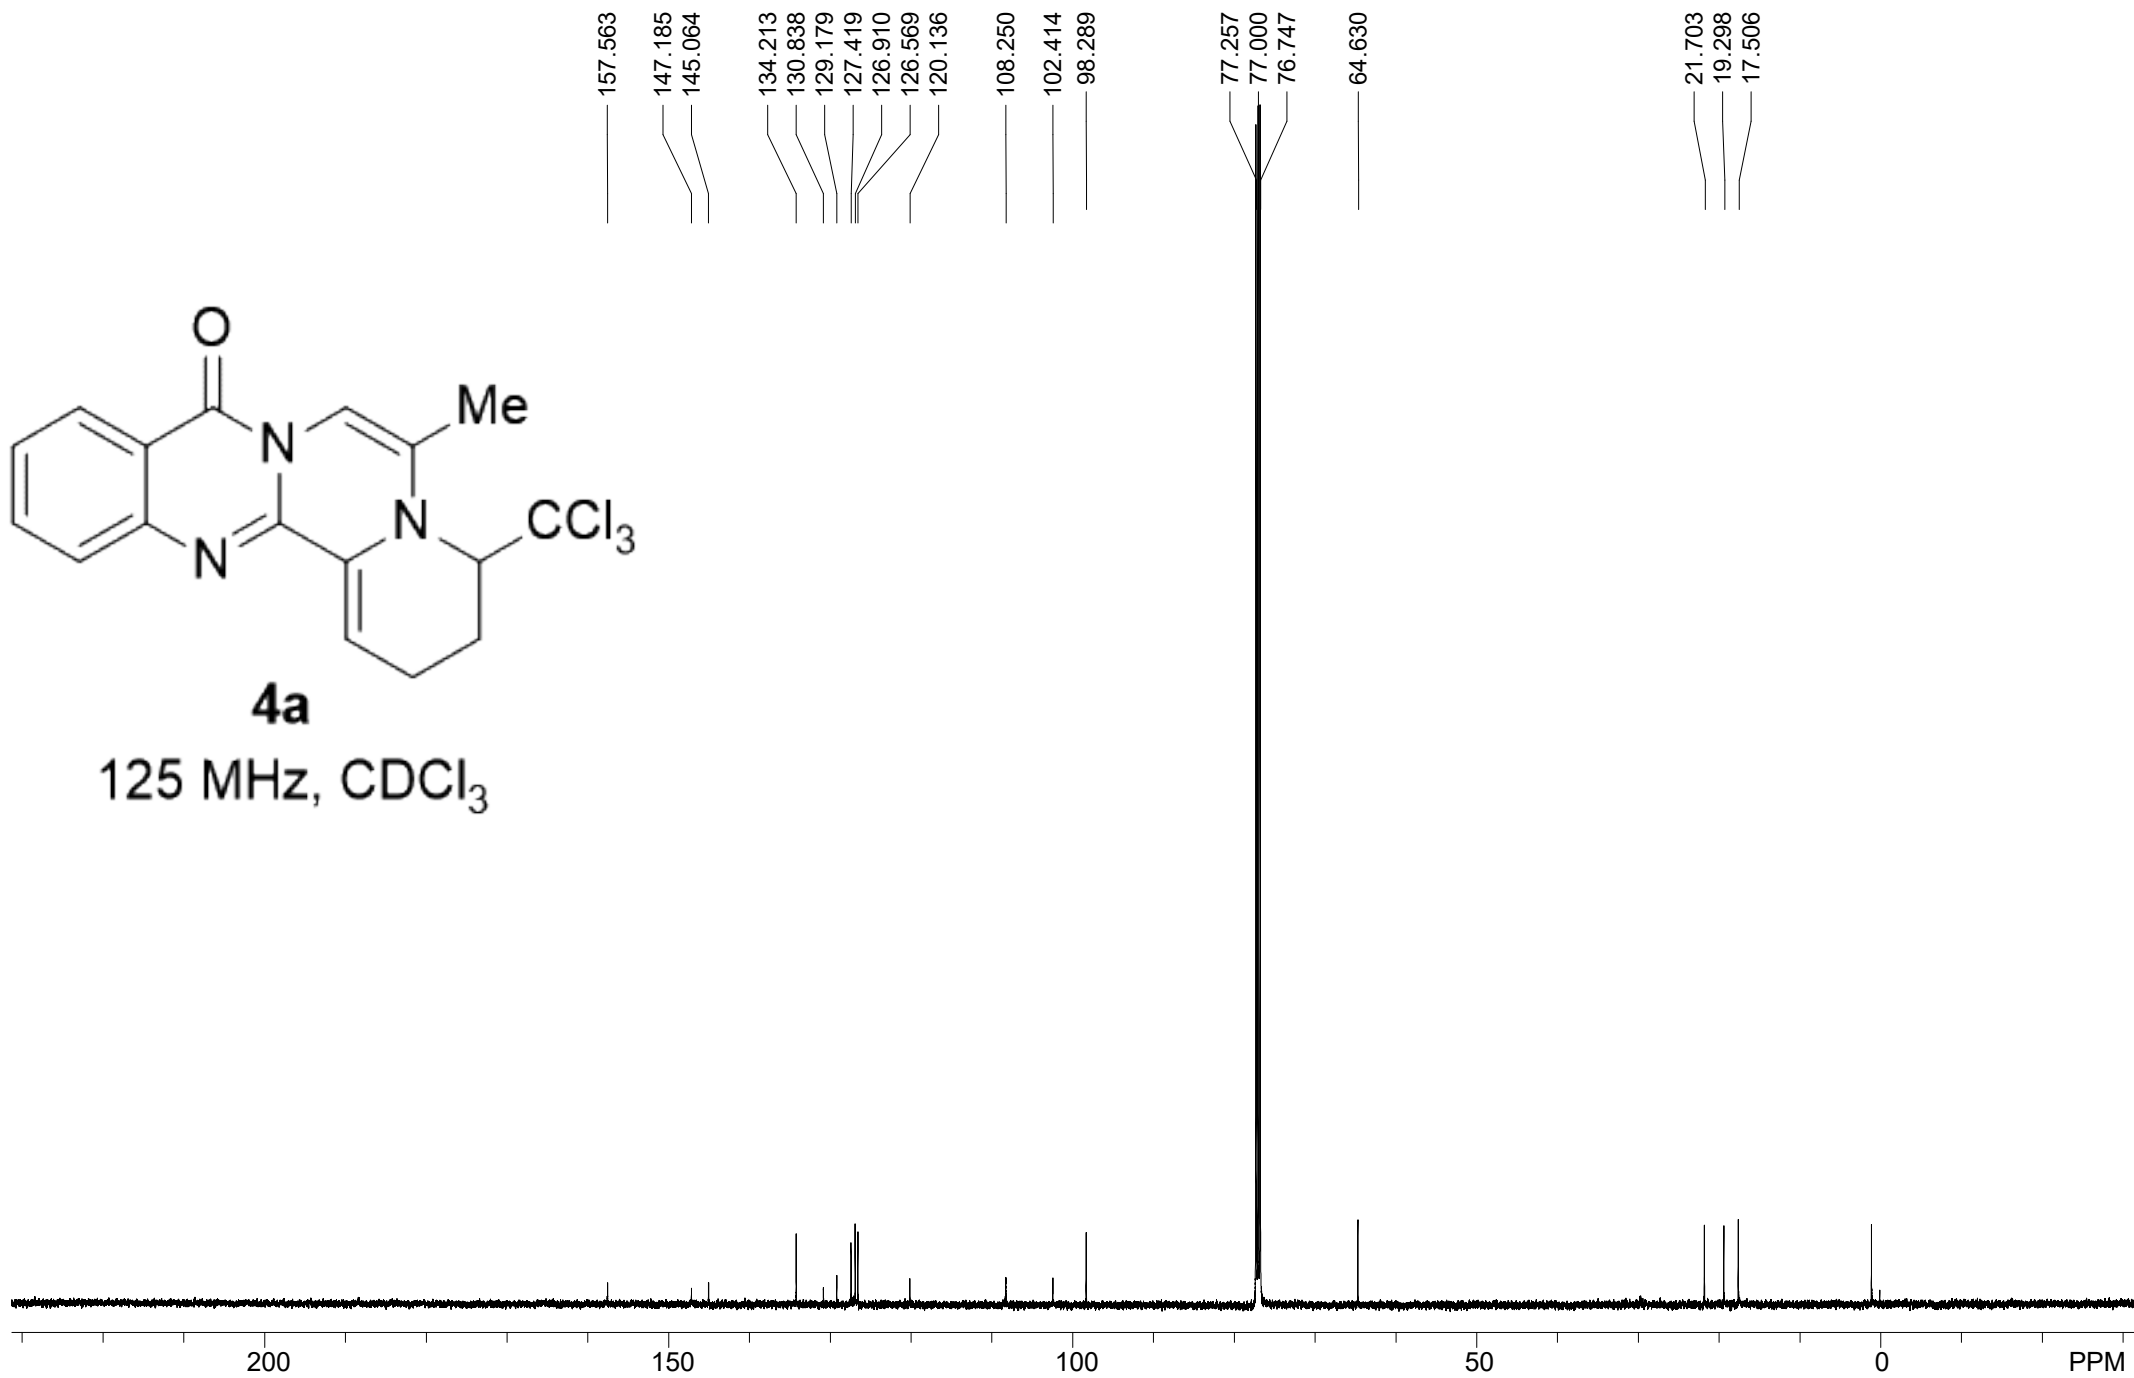

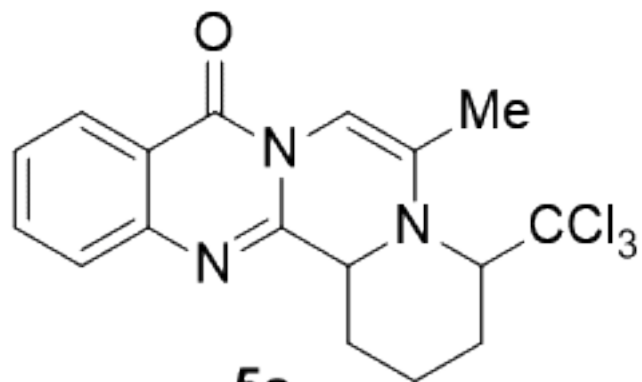

5a

500 MHz, CDCl<sub>3</sub>

8.319  
8.303  
7.697  
7.671  
7.446  
7.434  
7.424  
6.963

4.483  
4.477  
4.463  
4.454  
3.907  
3.893  
3.884  
3.870

2.623  
2.598  
2.571  
2.546  
2.519  
2.492  
2.485  
2.469  
2.360  
2.350  
2.341  
2.163  
2.071  
2.061  
2.048  
2.031  
2.007  
1.988  
1.982  
1.617  
1.598  
1.576  
1.555  
1.549  
1.531  
1.523

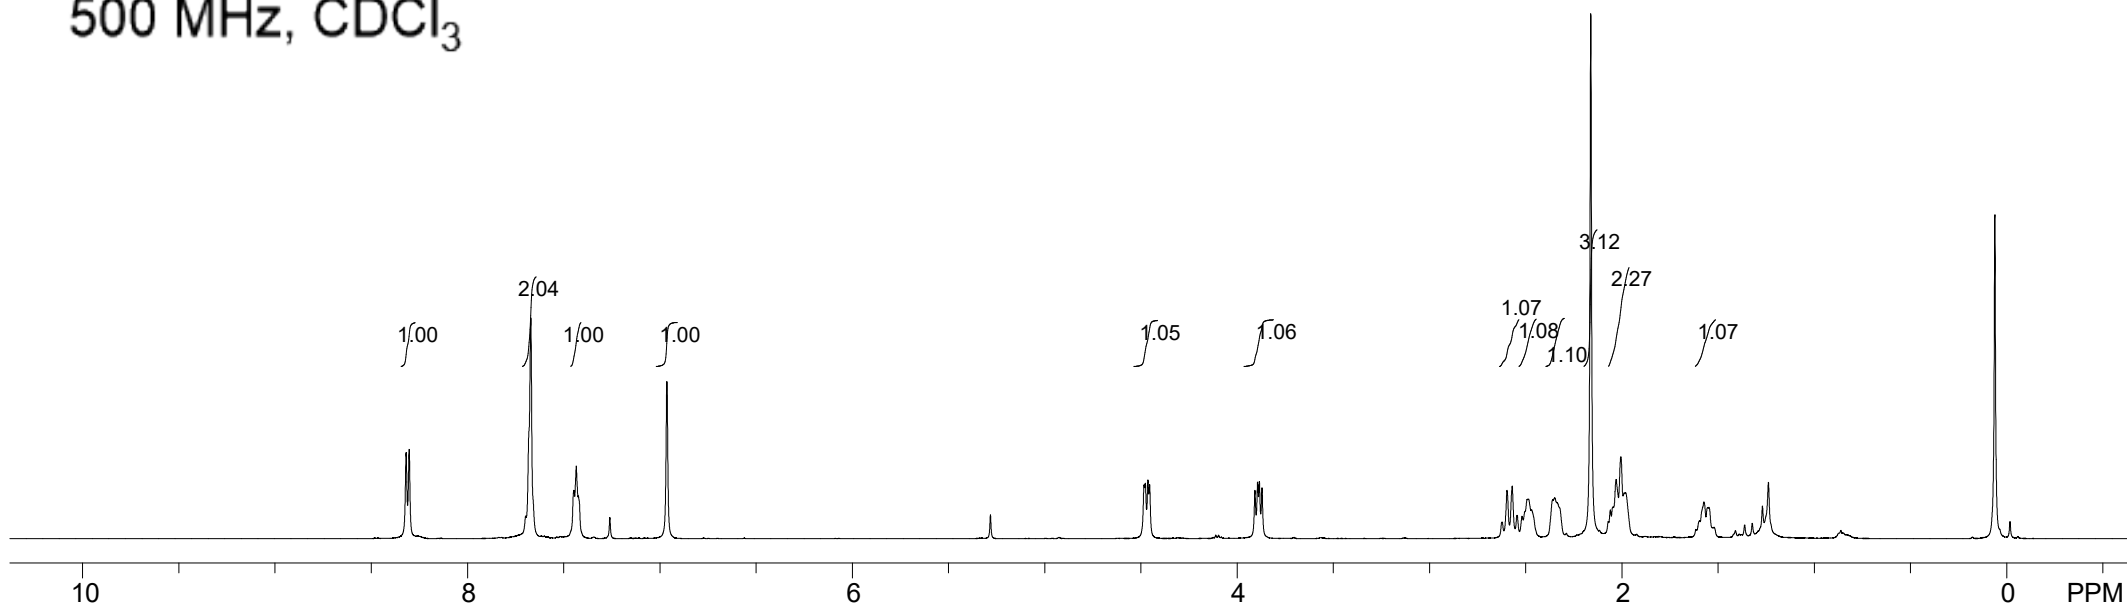



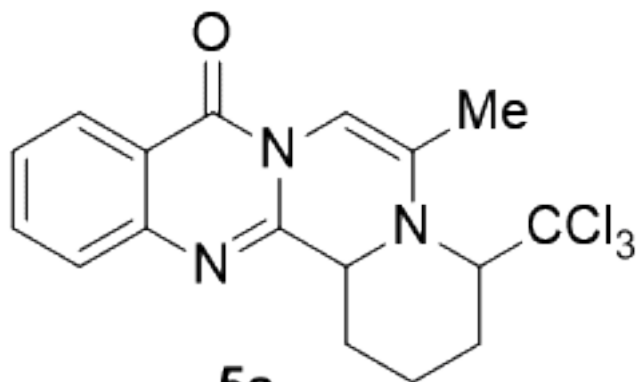

5a

125 MHz, CDCl<sub>3</sub>

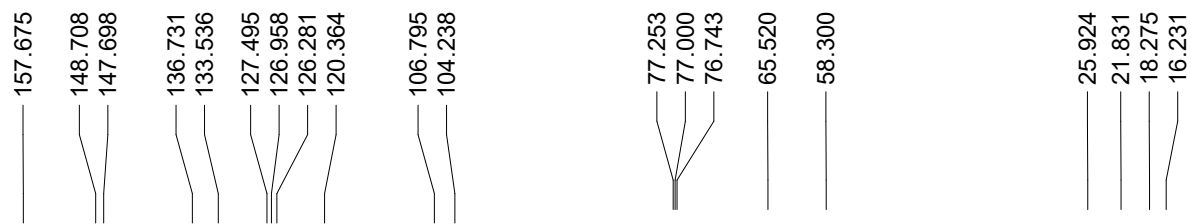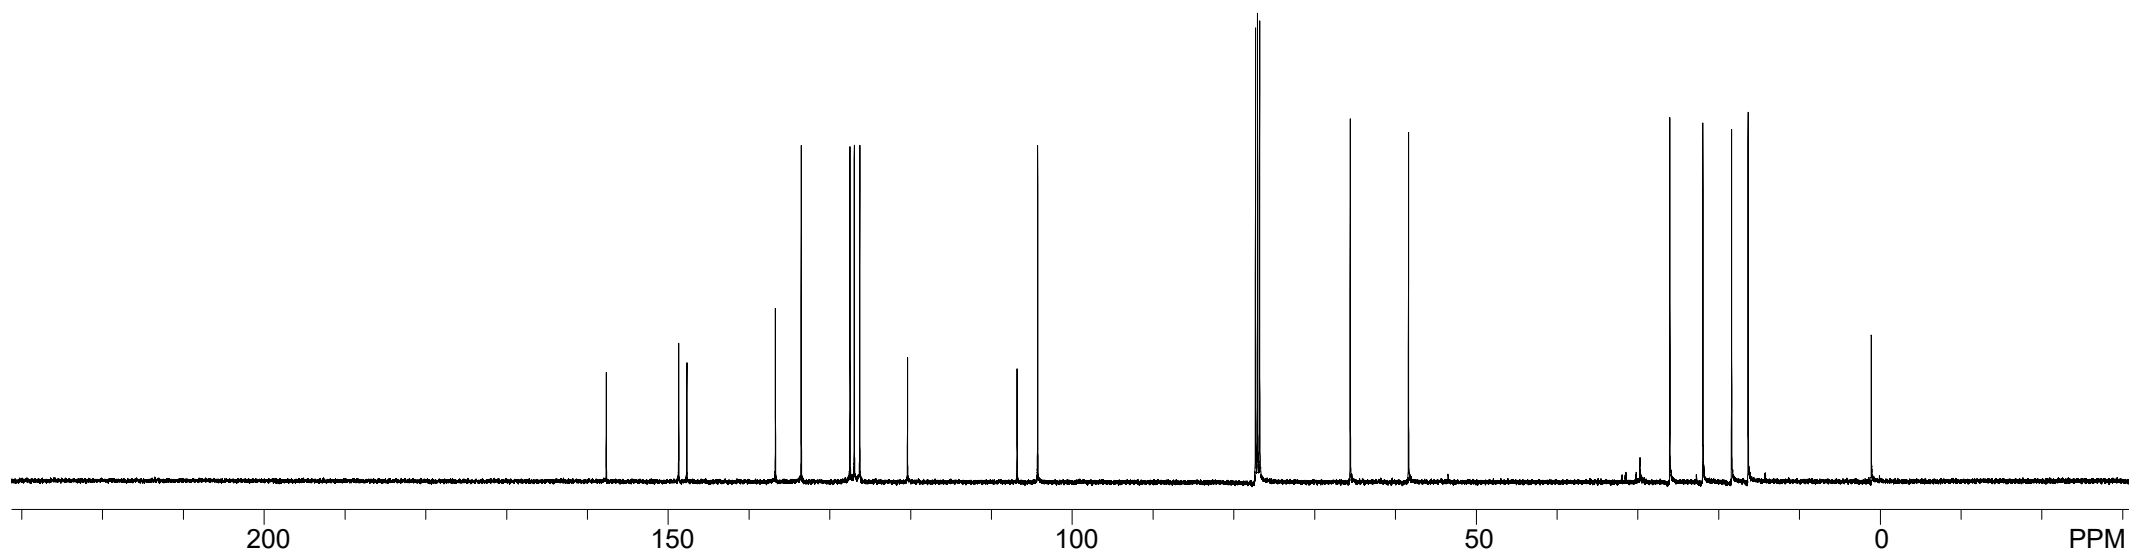

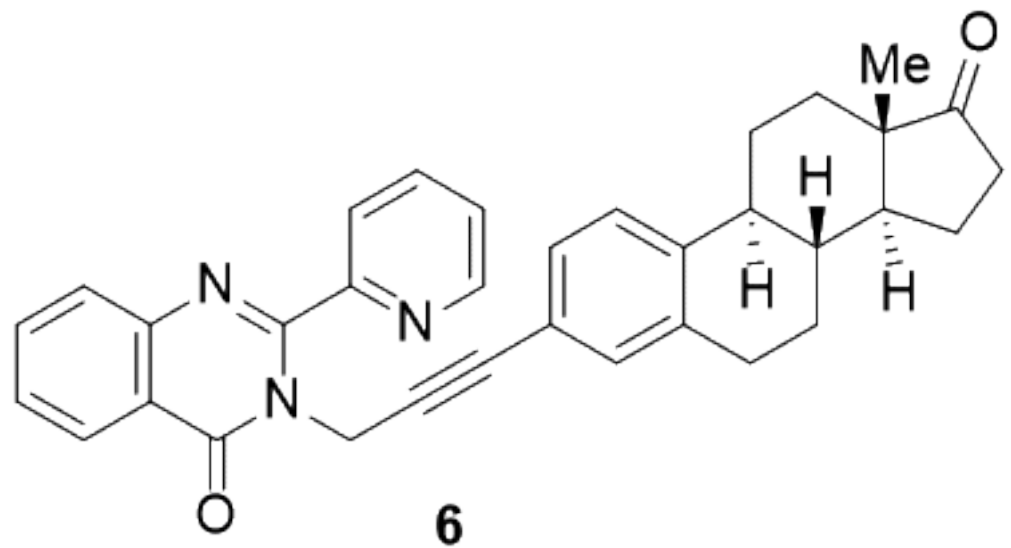

500 MHz, CDCl<sub>3</sub>

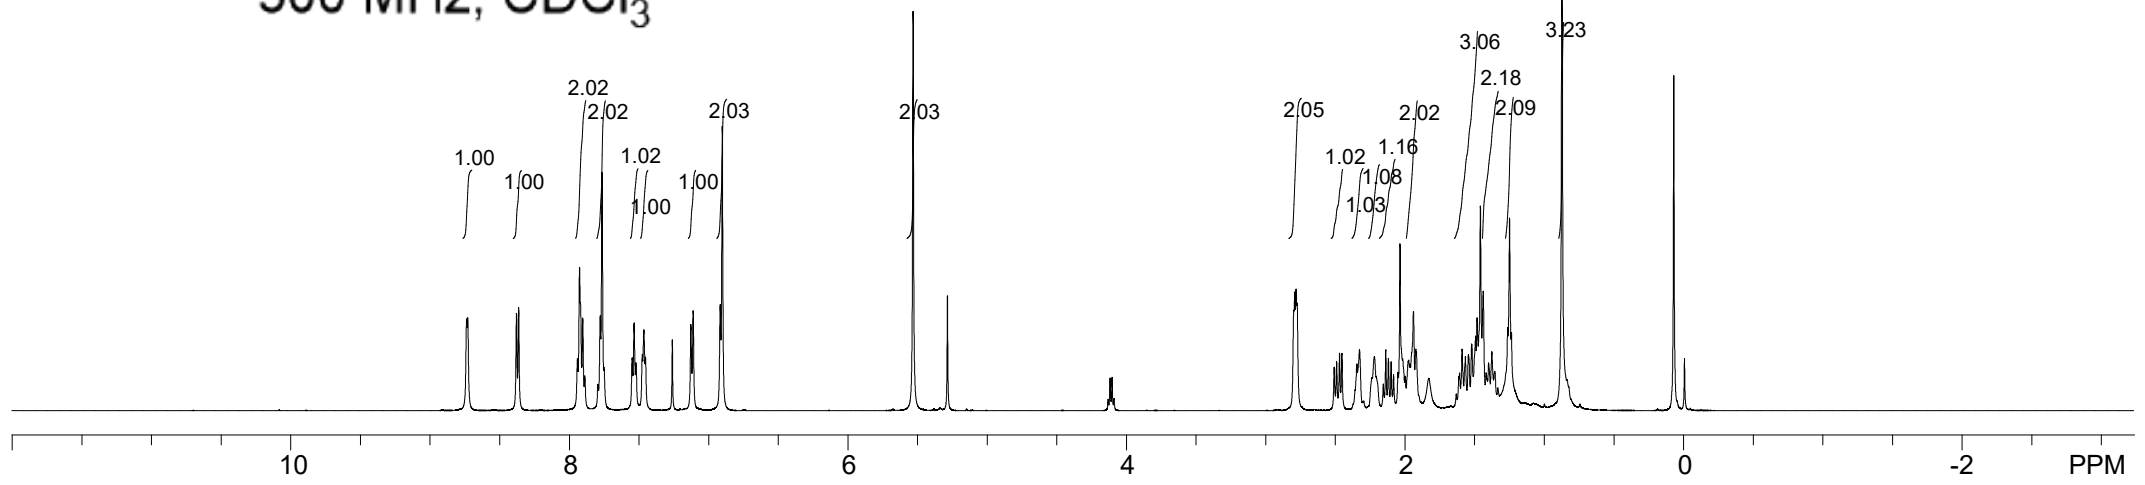

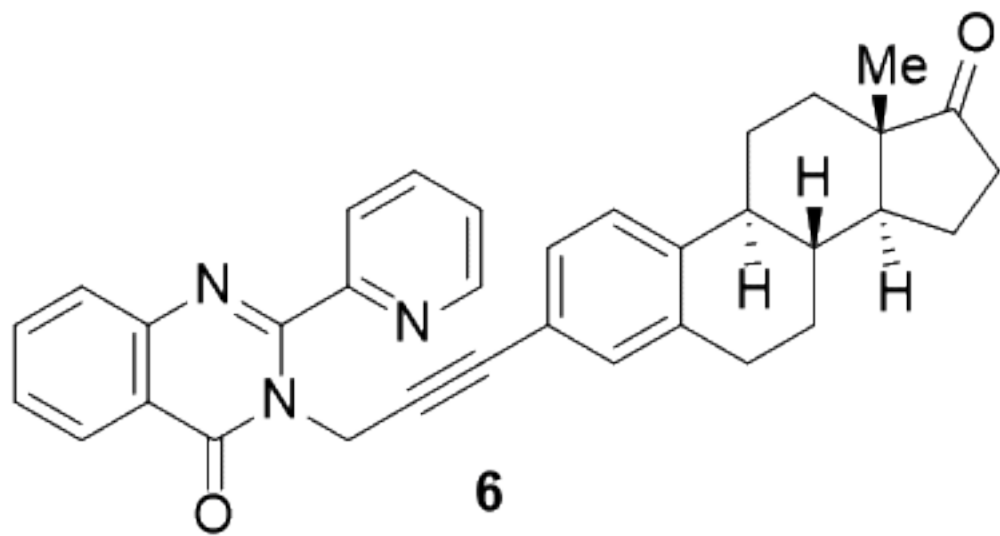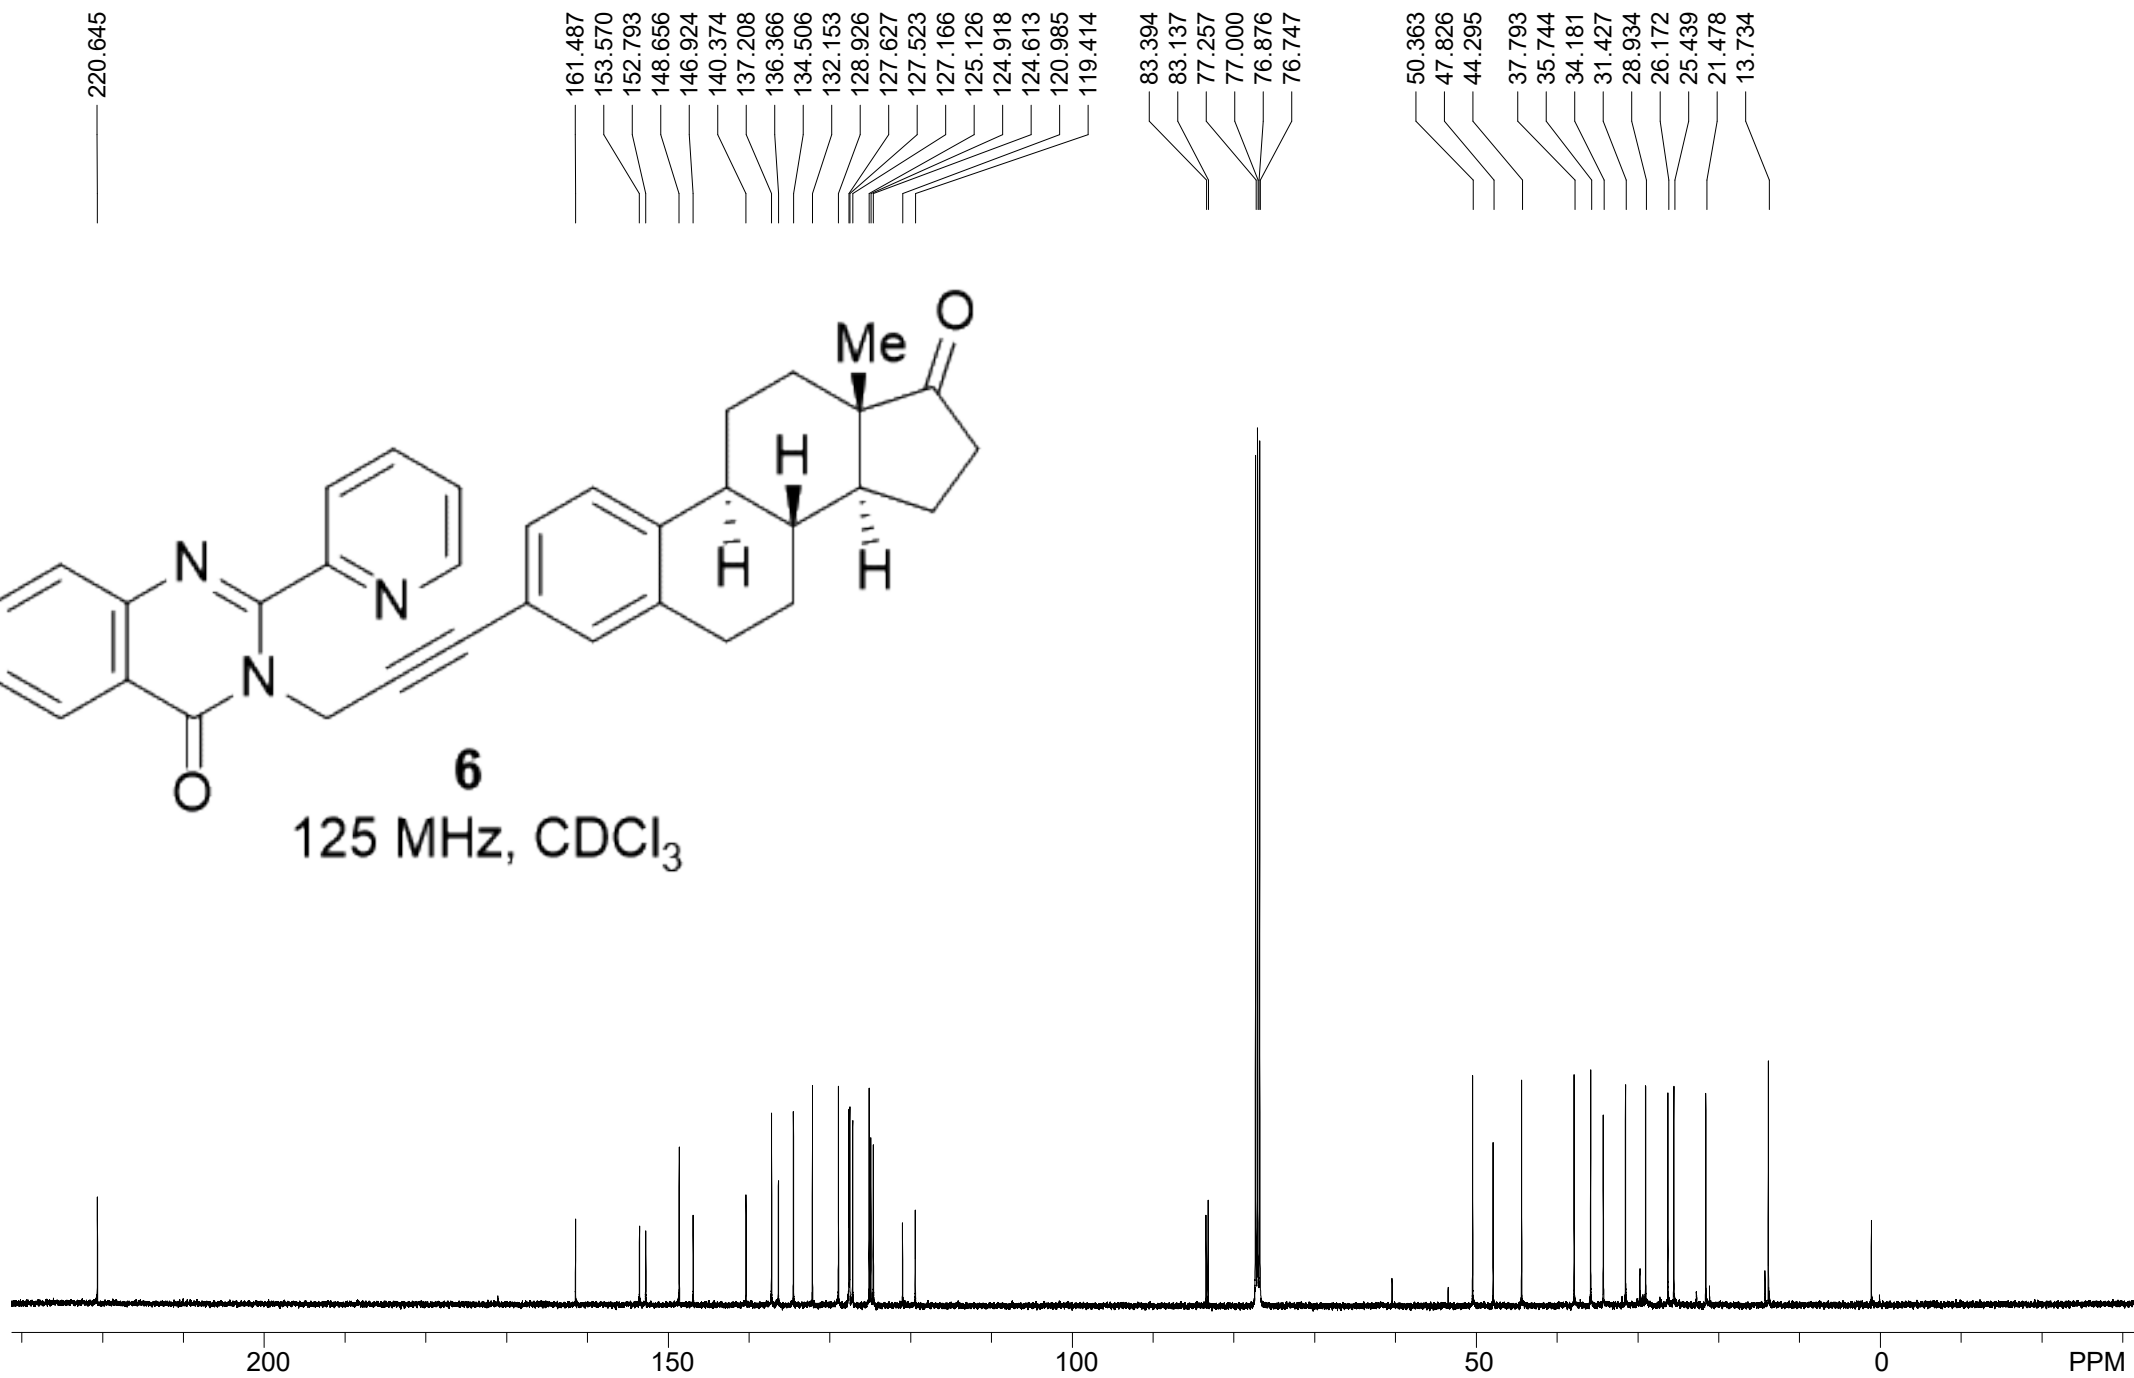

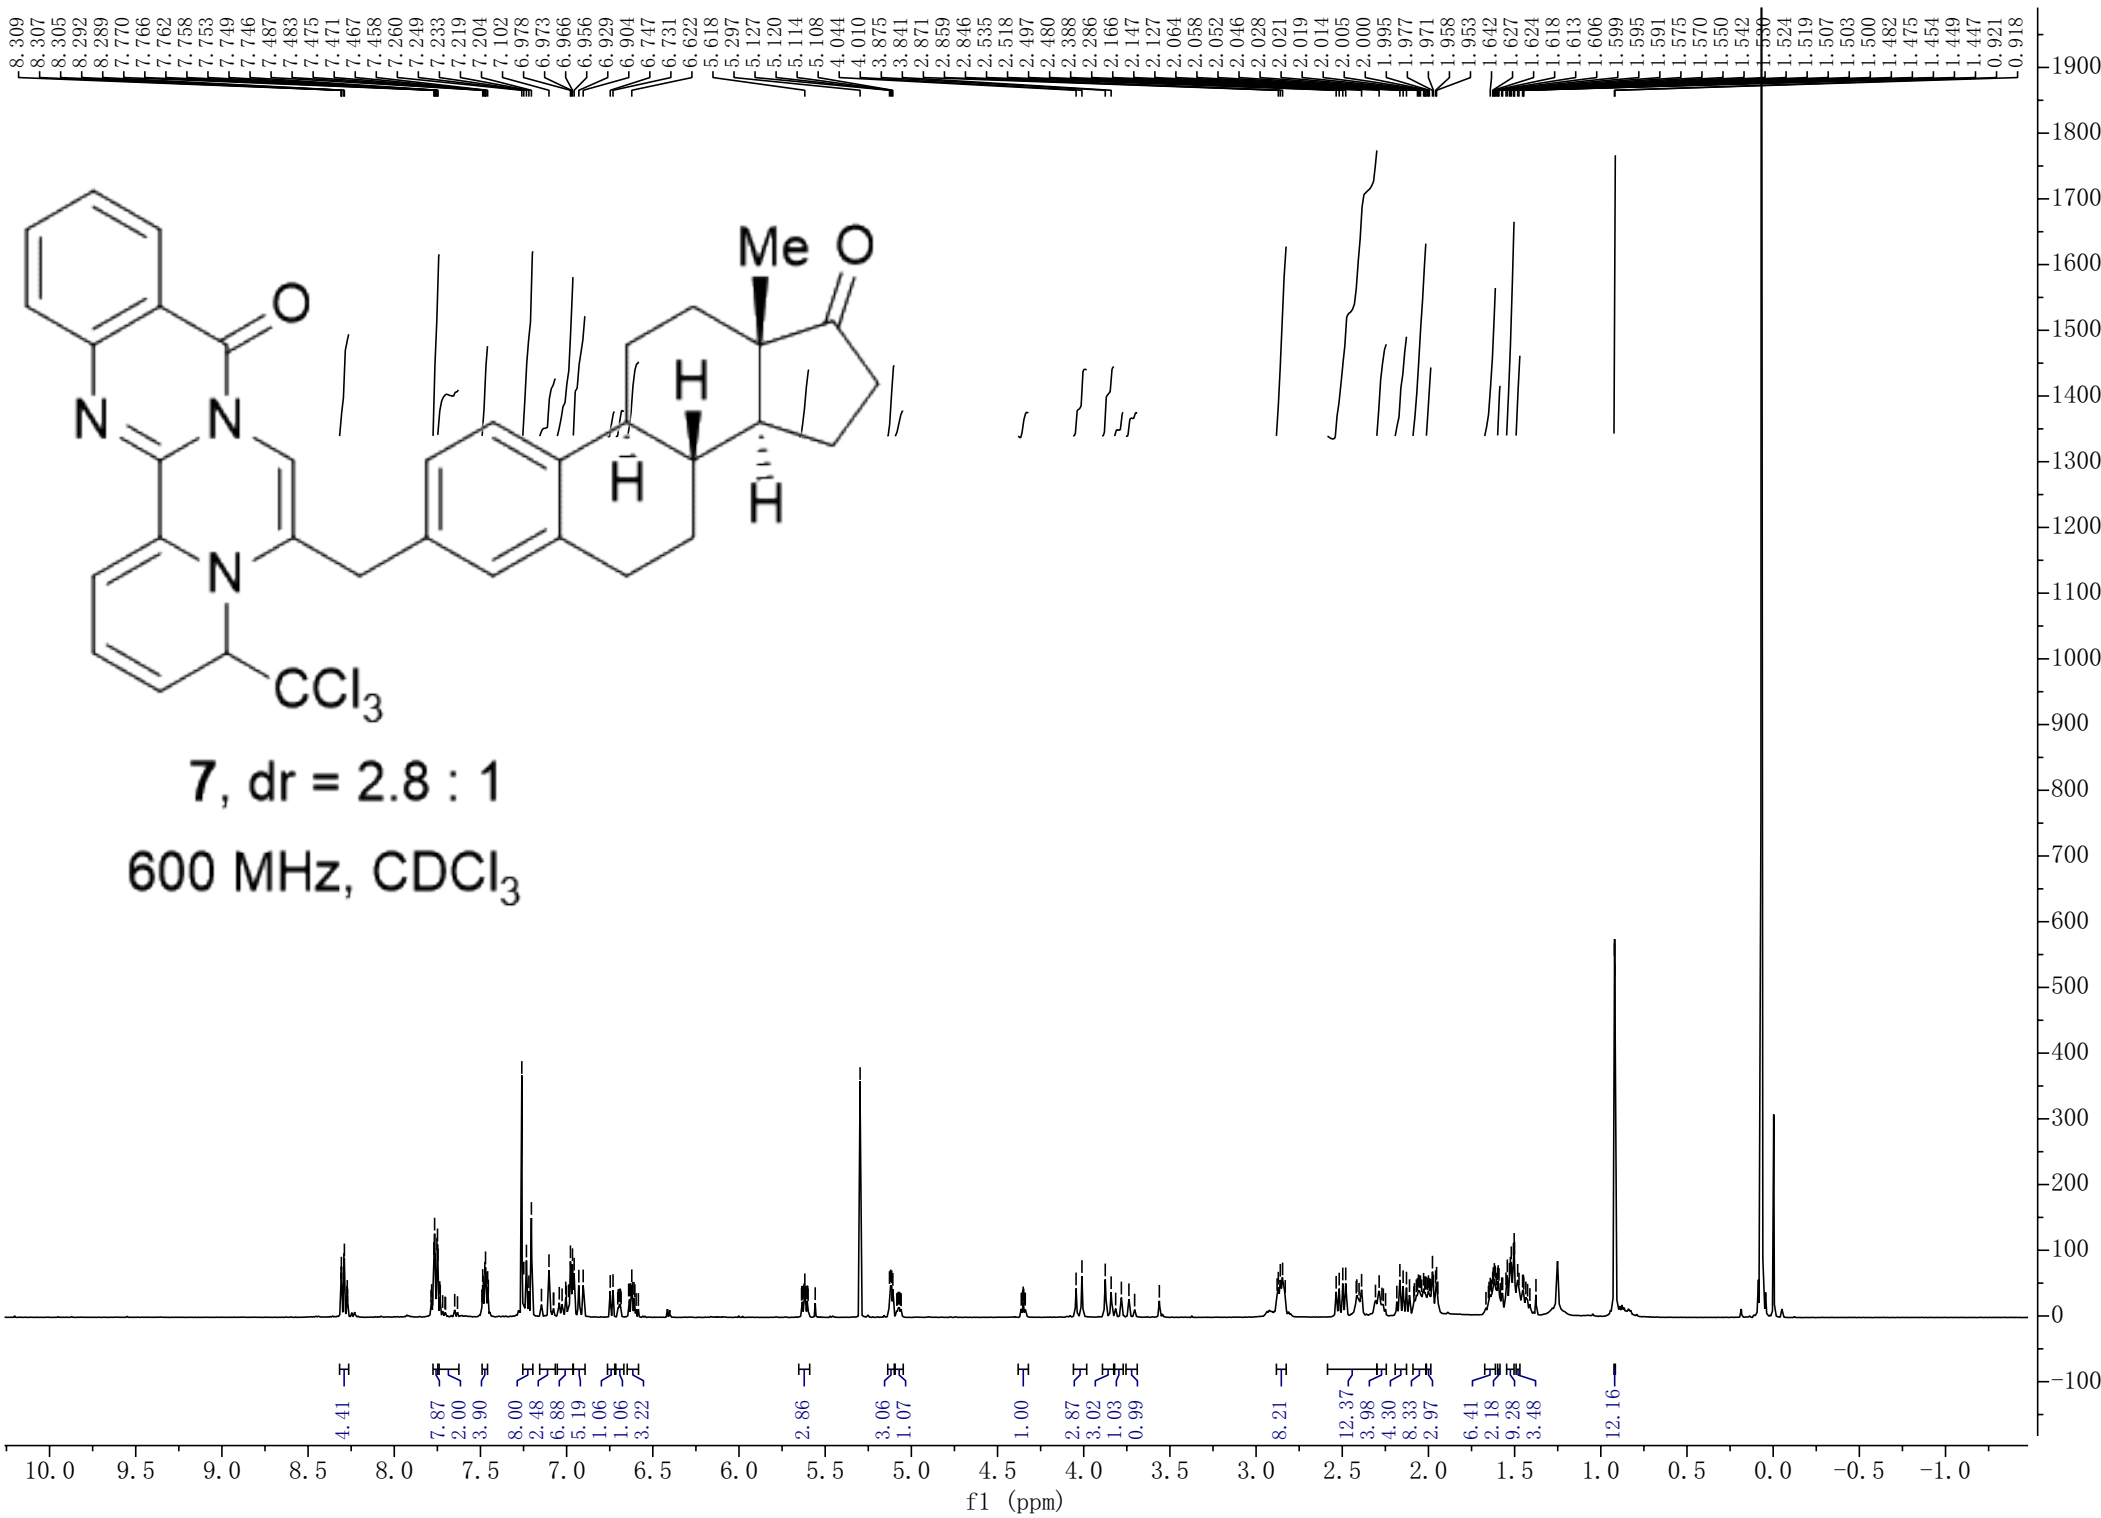

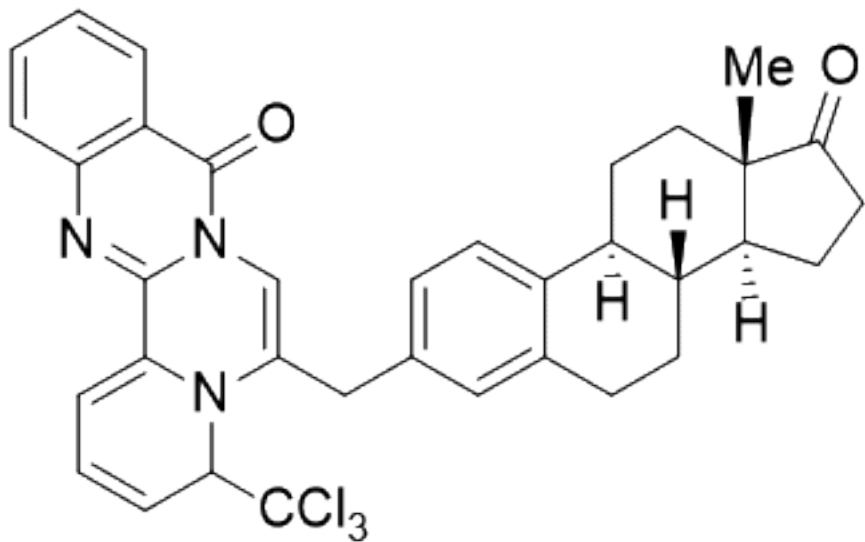

**7, dr = 2.8 : 1**  
**150 MHz, CDCl<sub>3</sub>**

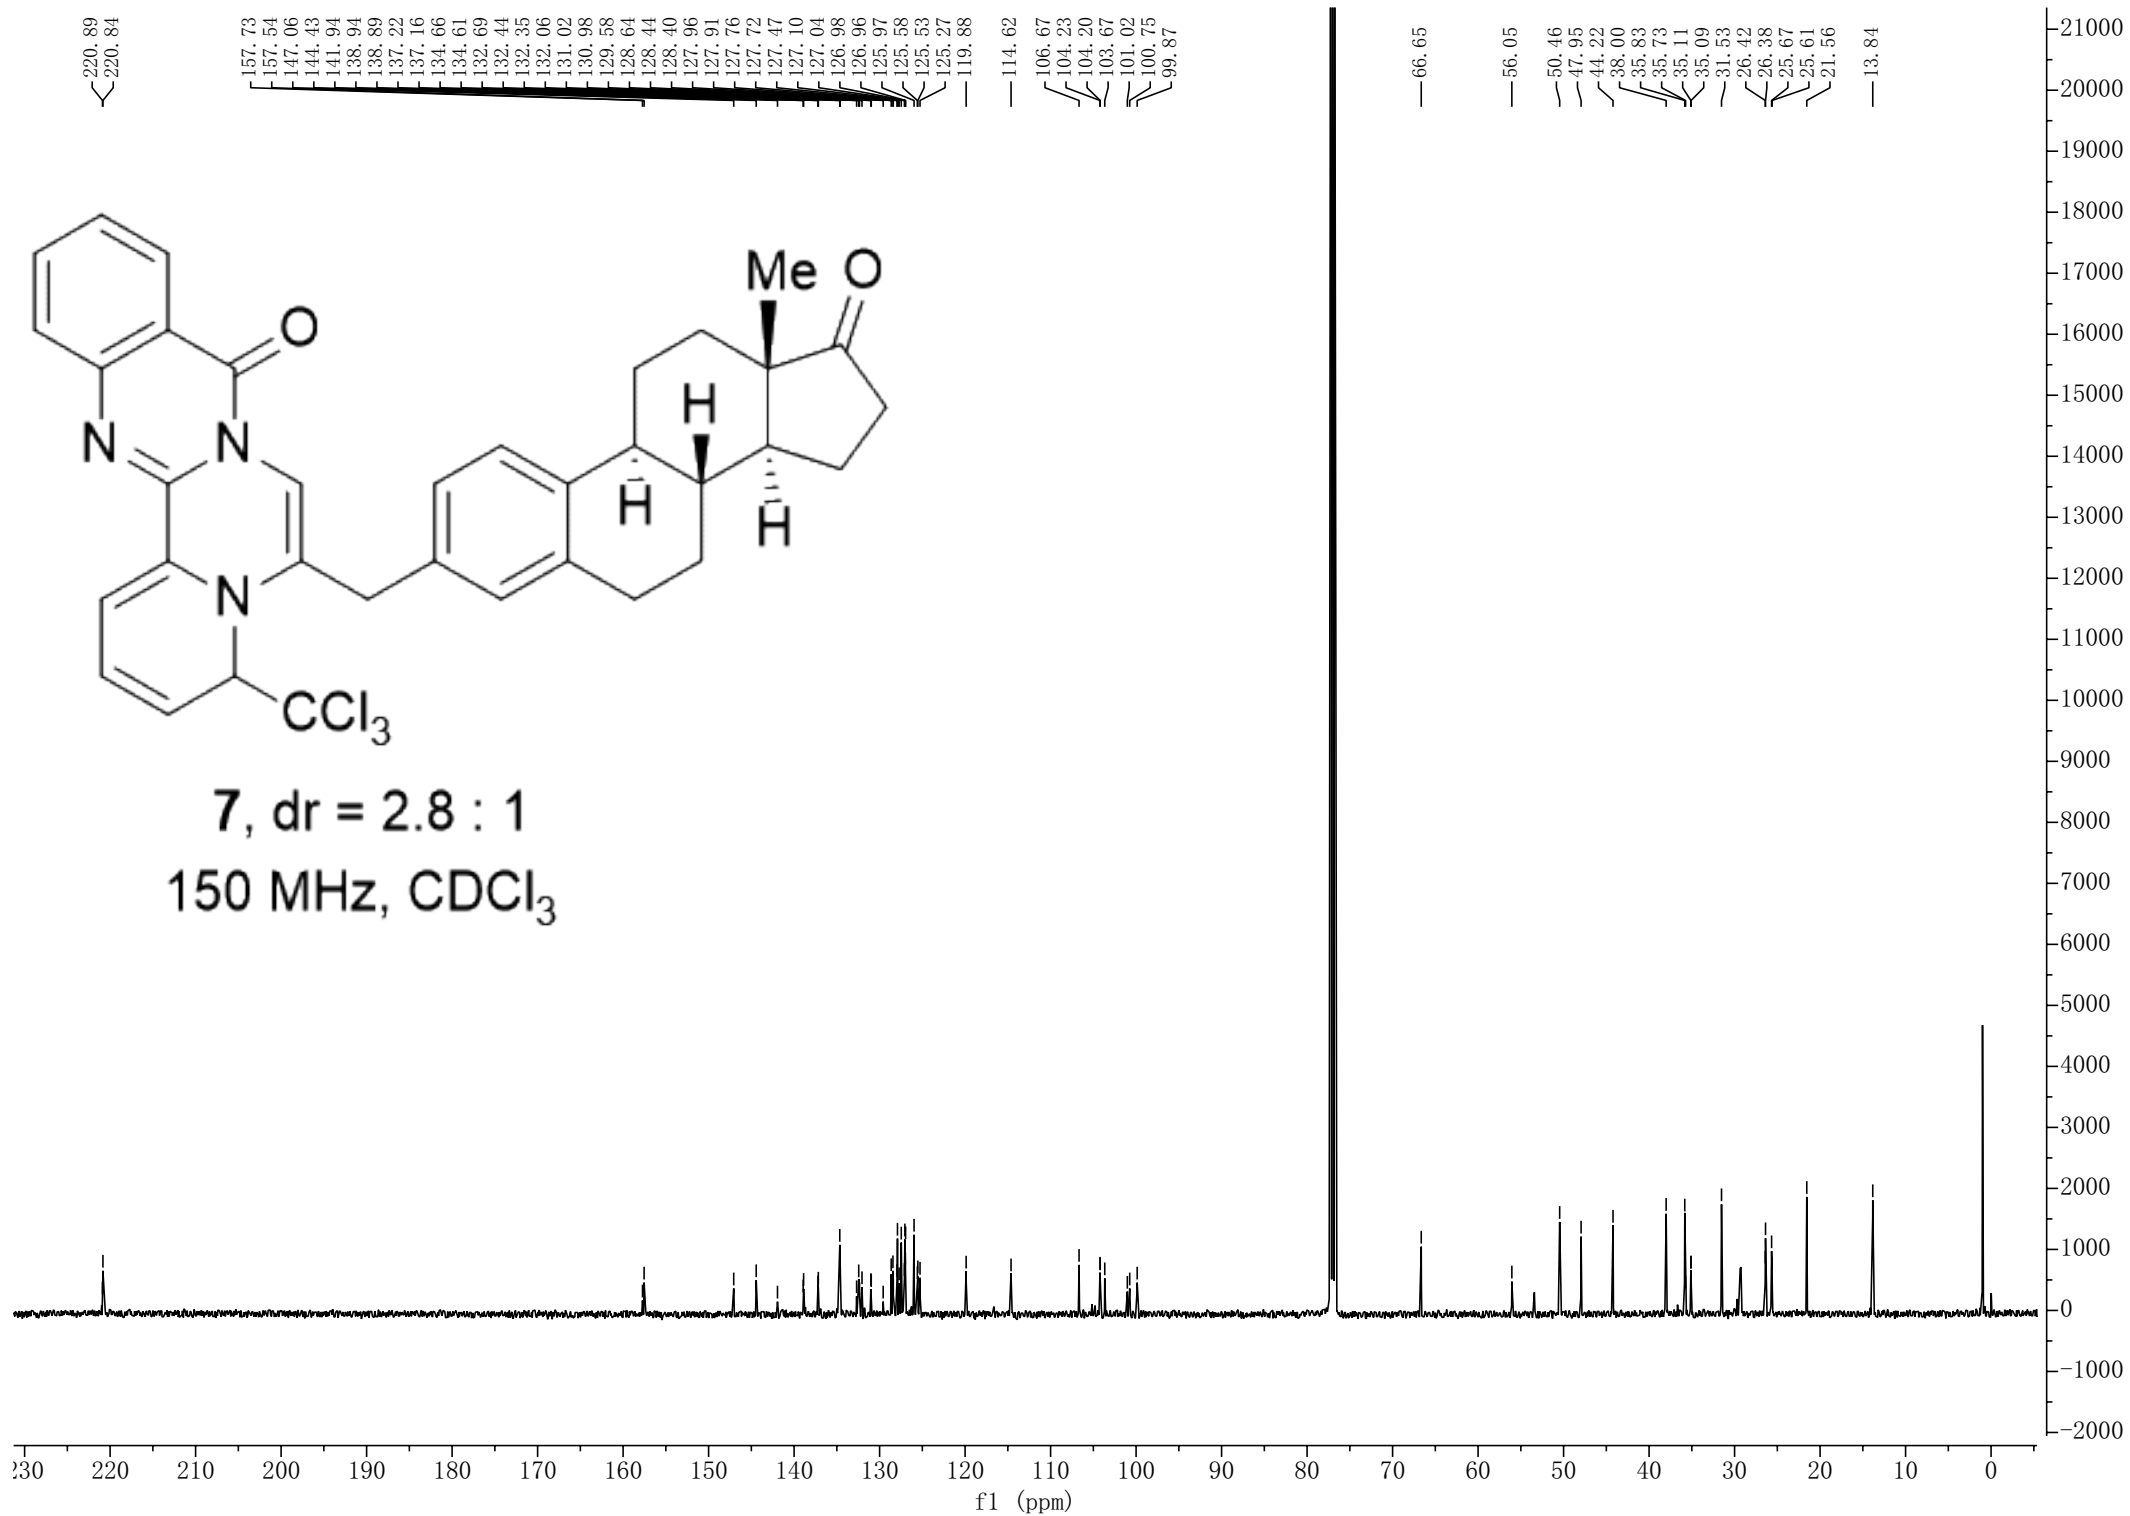

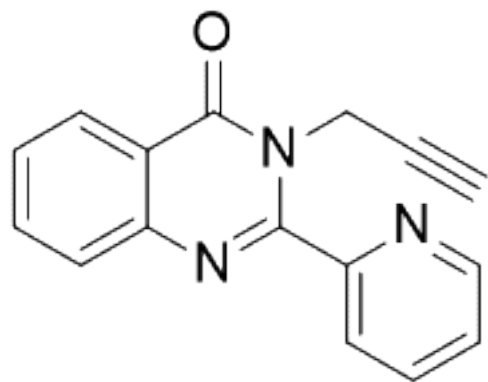

**1a**

400 MHz, DMSO-*d*6

8.741  
8.730  
8.244  
8.224  
8.097  
8.080  
8.061  
7.954  
7.934  
7.914  
7.895  
7.770  
7.750  
7.662  
7.642  
7.623

5.113  
5.109

3.087

1.07  
1.08  
2.14  
2.14  
1.07  
1.03

2.24

1.00

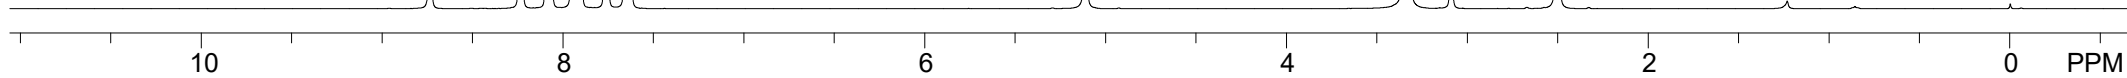

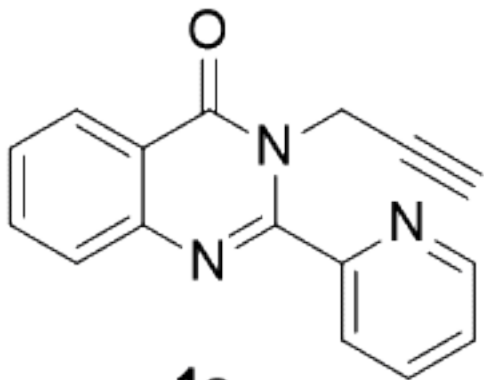

**1a**

125 MHz, DMSO-*d*6

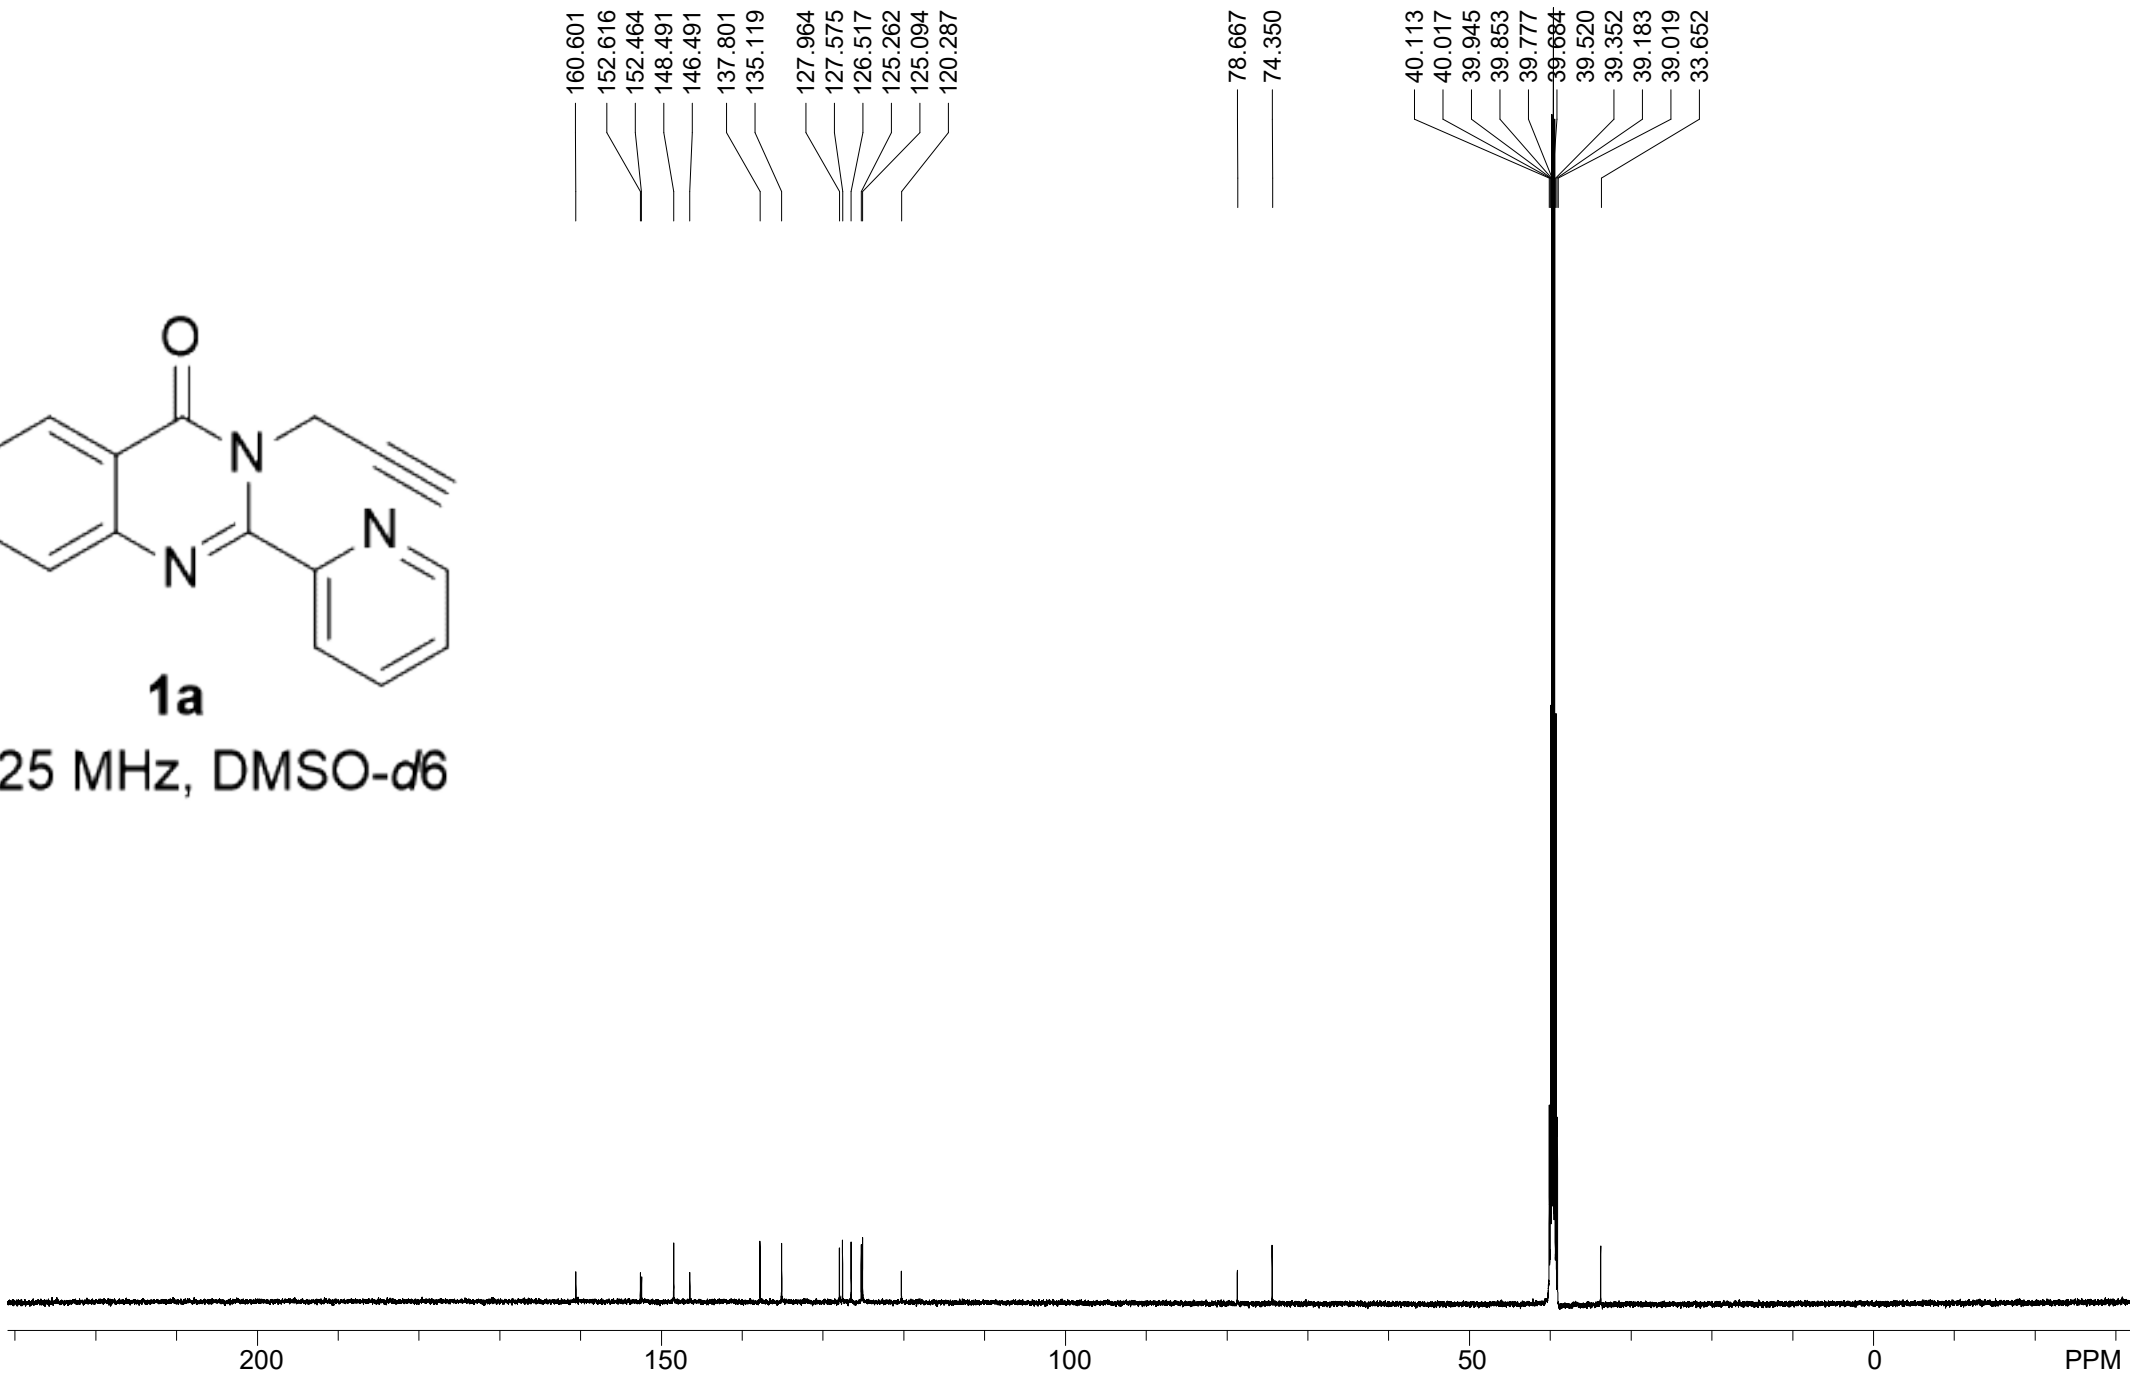

8.718  
8.707  
7.944  
7.927  
7.911  
7.891  
7.630  
7.610  
7.592  
7.573  
7.470  
7.465  
7.453  
7.441  
7.437  
7.292  
7.277

5.212  
5.207

2.932

2.040

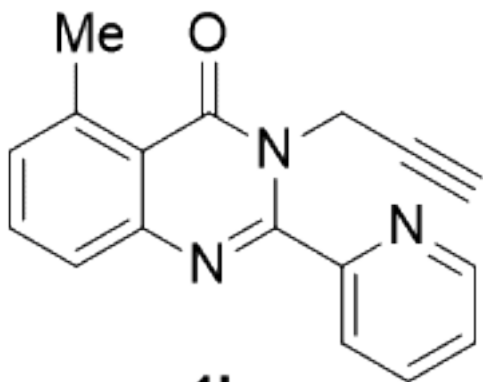

**1b**

400 MHz, CDCl<sub>3</sub>

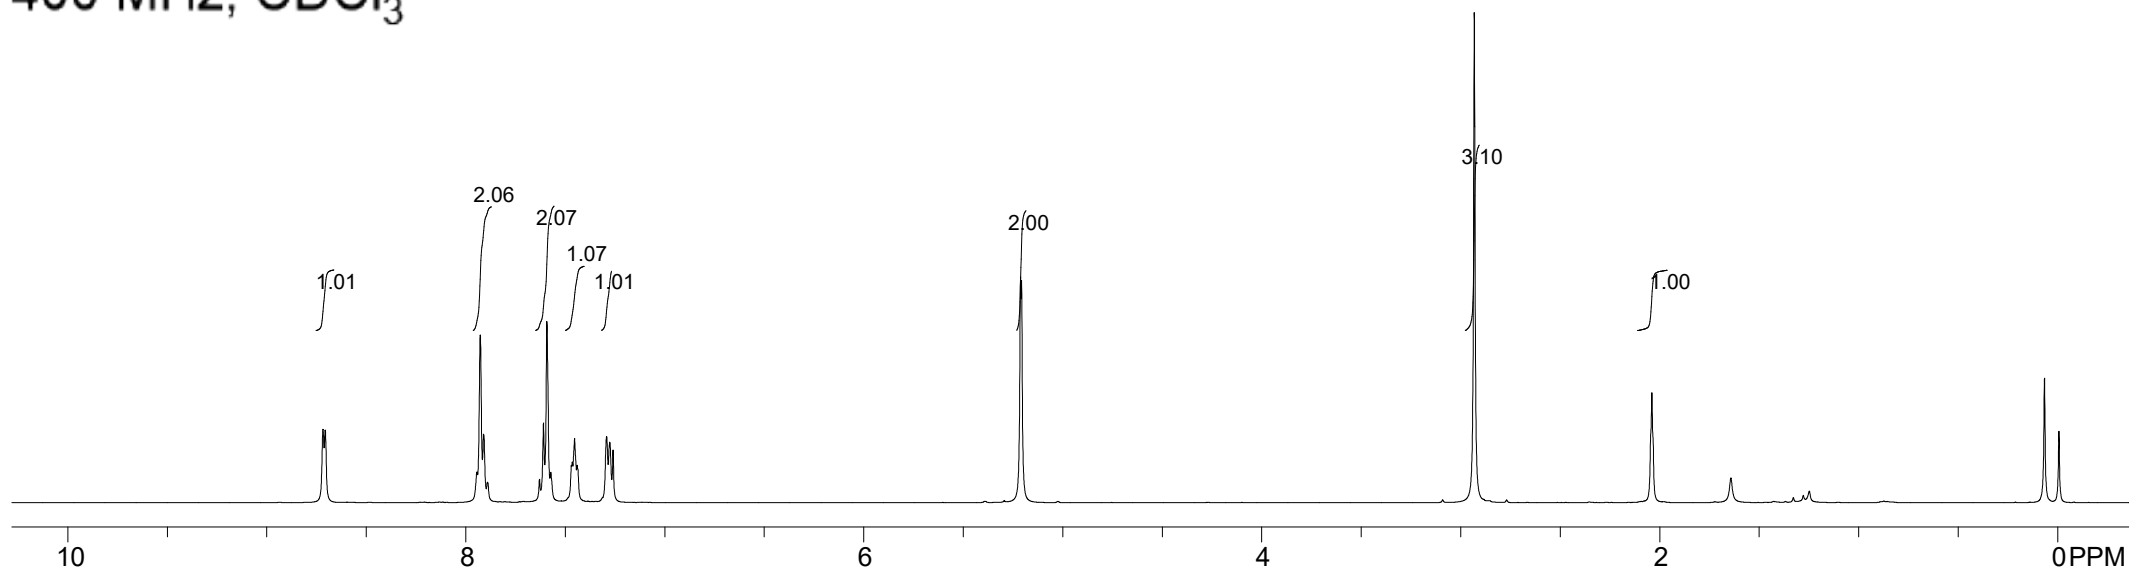



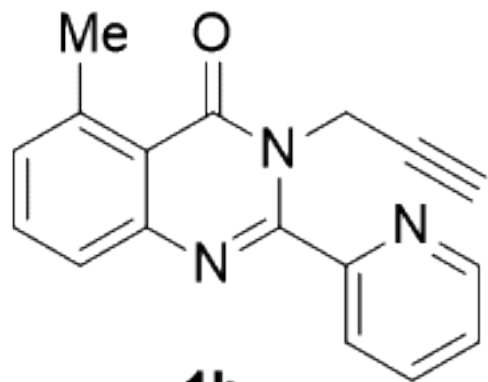

**1b**  
100 MHz, CDCl<sub>3</sub>

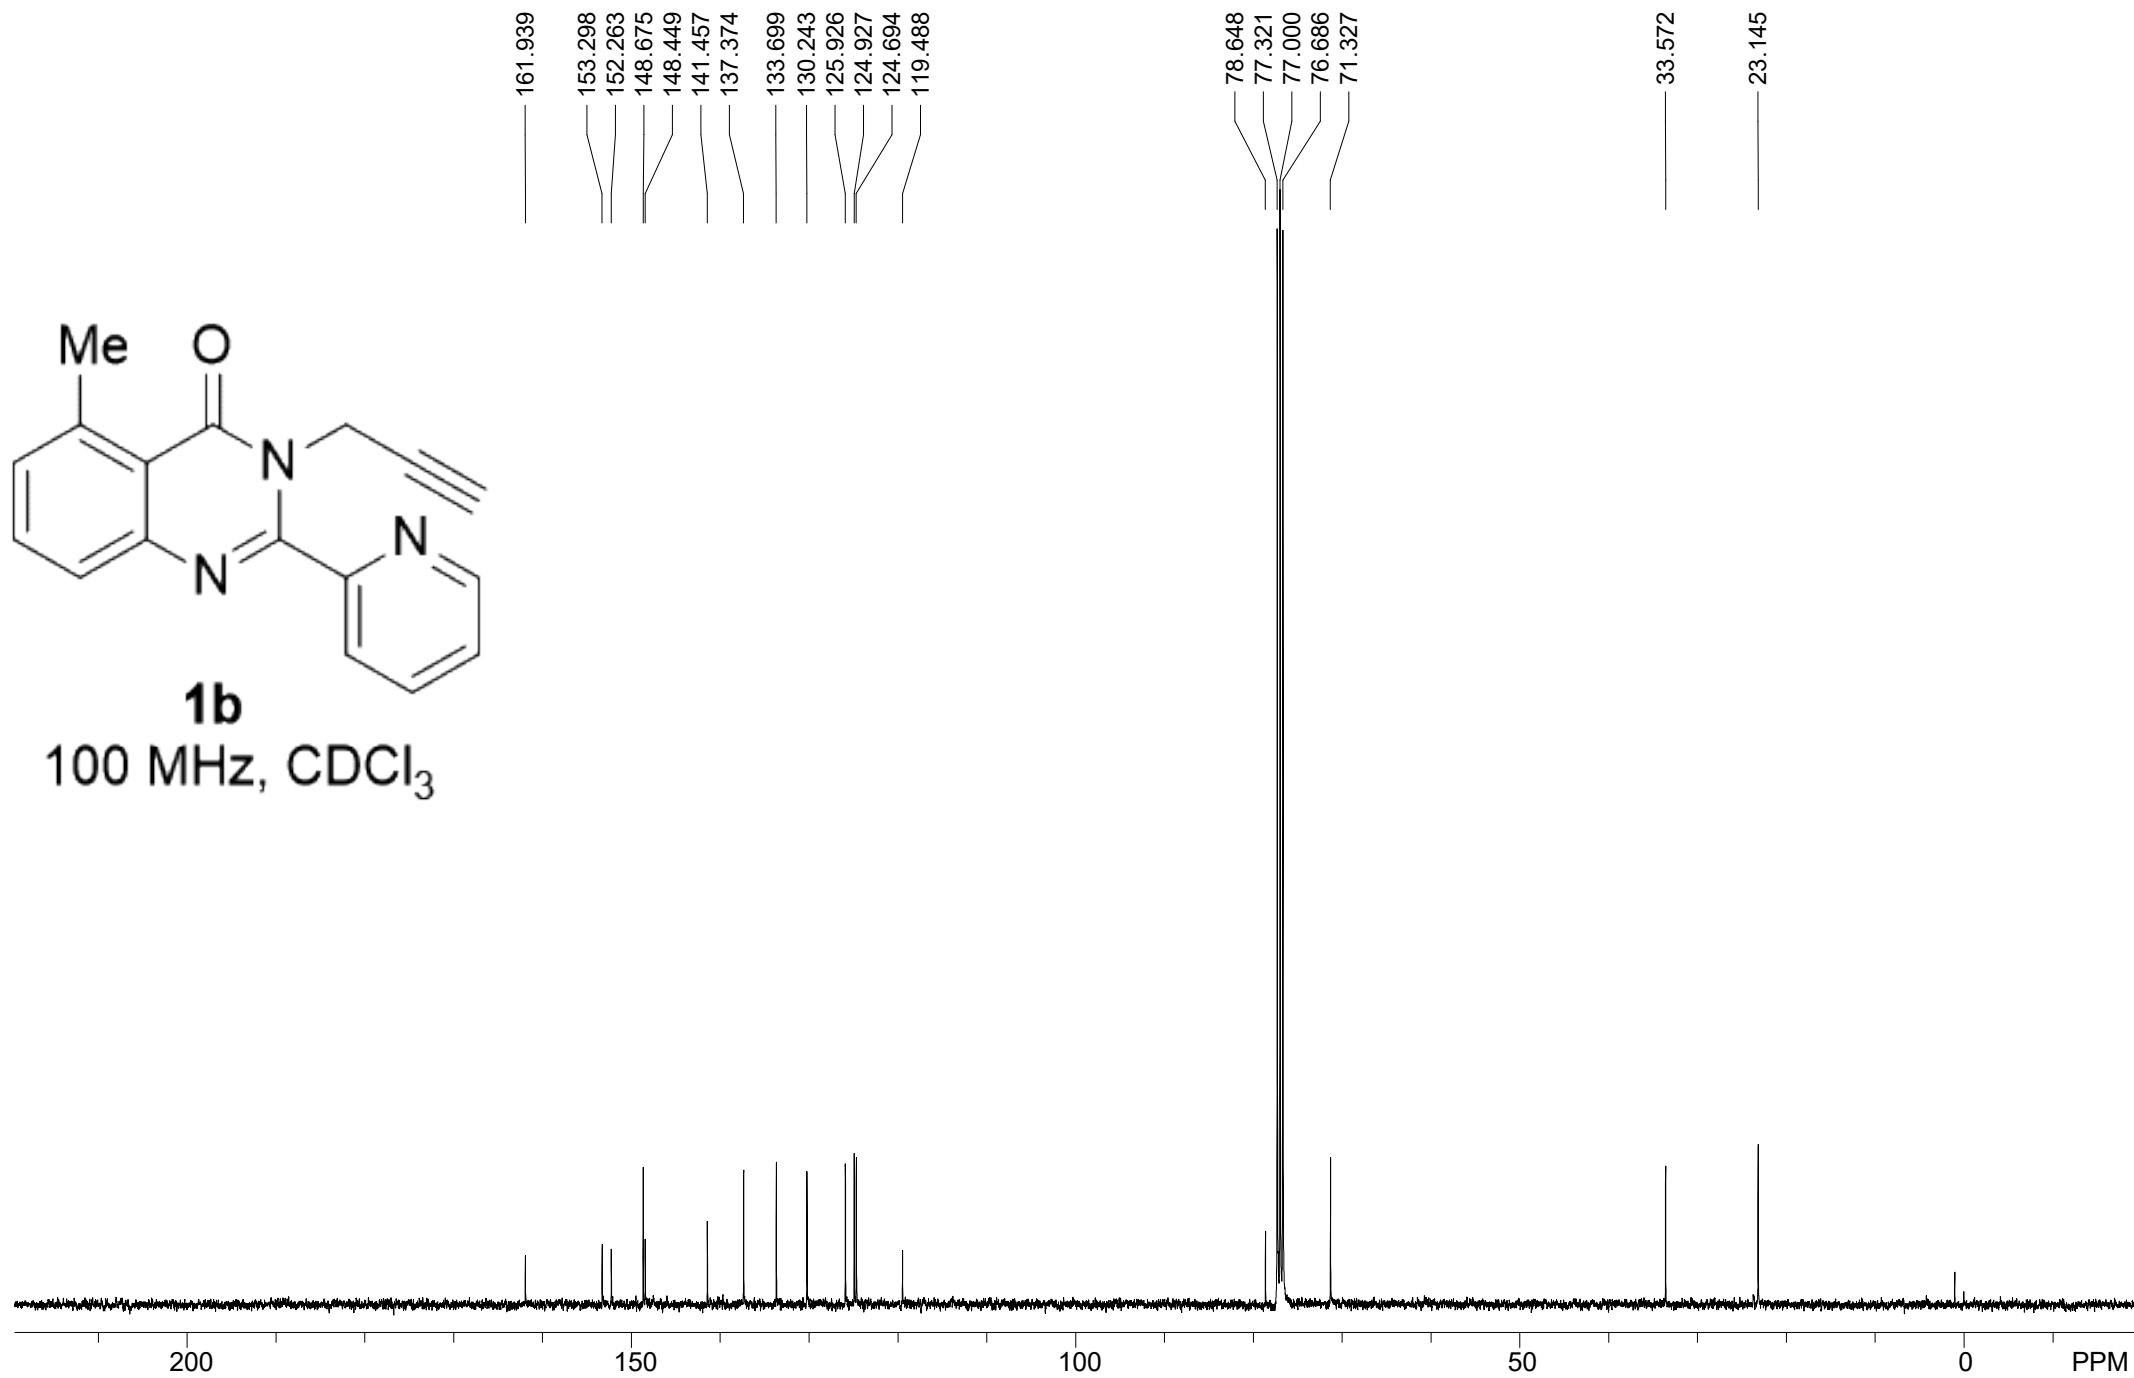

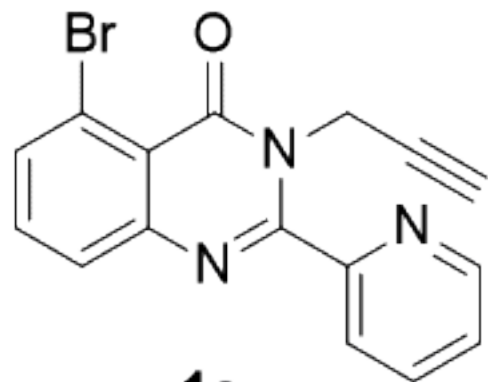

**1c**

400 MHz, CDCl<sub>3</sub>

8.723  
8.712  
7.941  
7.927  
7.906  
7.775  
7.755  
7.708  
7.688  
7.553  
7.532  
7.512  
7.488  
7.477  
7.466

5.268  
5.264

2.049

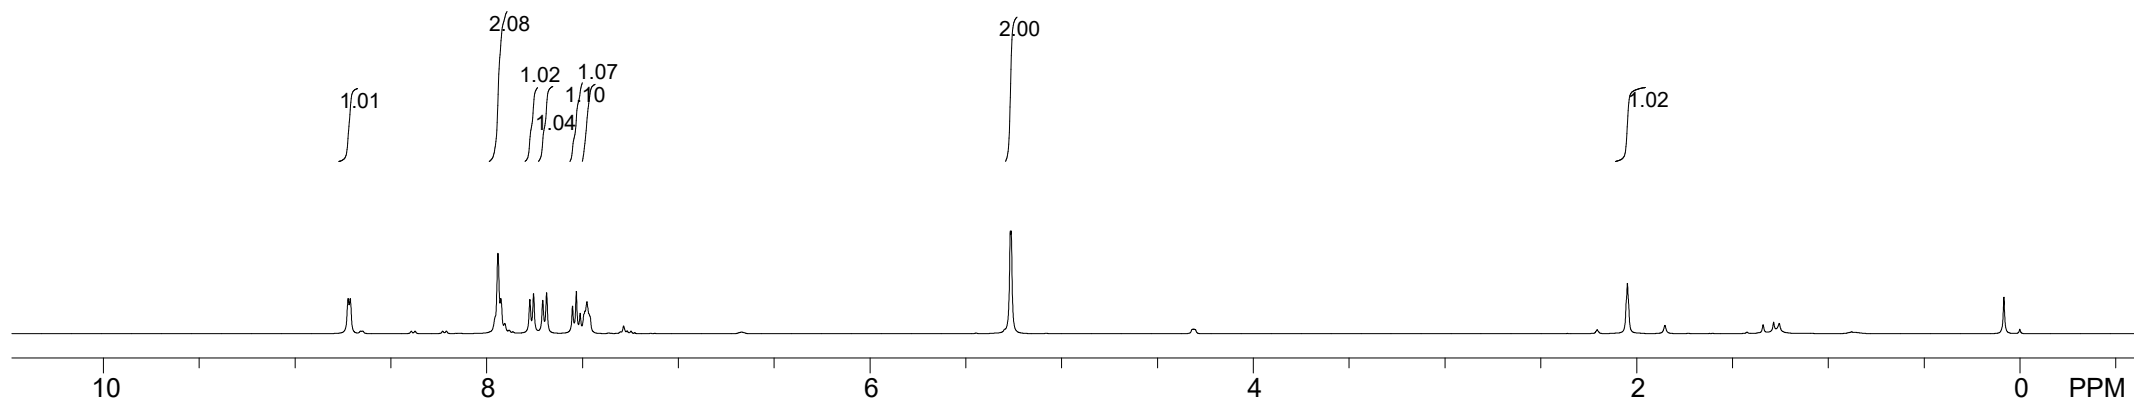

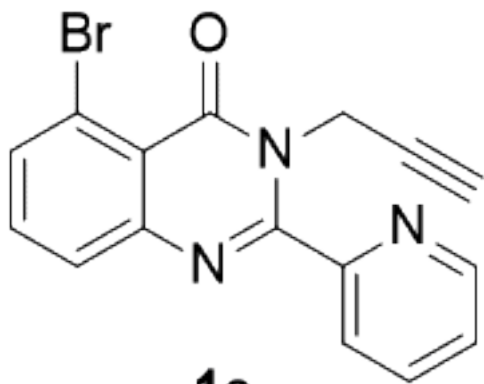

**1c**

100 MHz, CDCl<sub>3</sub>

159.540  
152.803  
152.773  
149.098  
148.632  
137.352  
134.173  
134.034  
127.720  
124.905  
121.726  
119.021

78.094  
77.314  
77.000  
76.679  
71.699

33.915

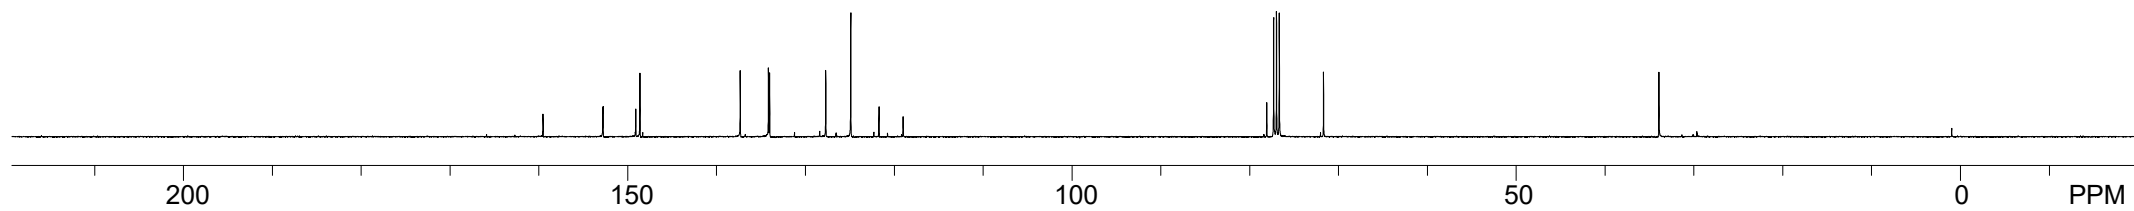

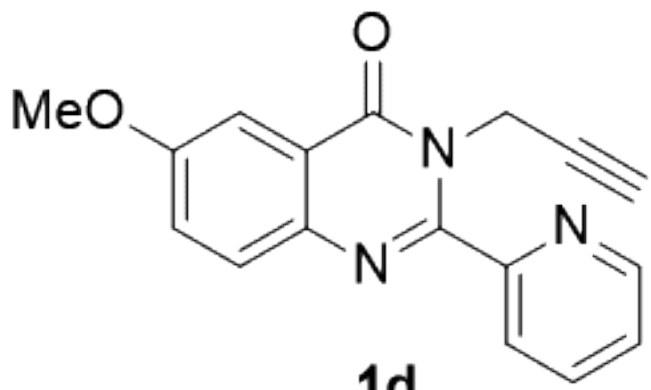

**1d**  
400 MHz, CDCl<sub>3</sub>

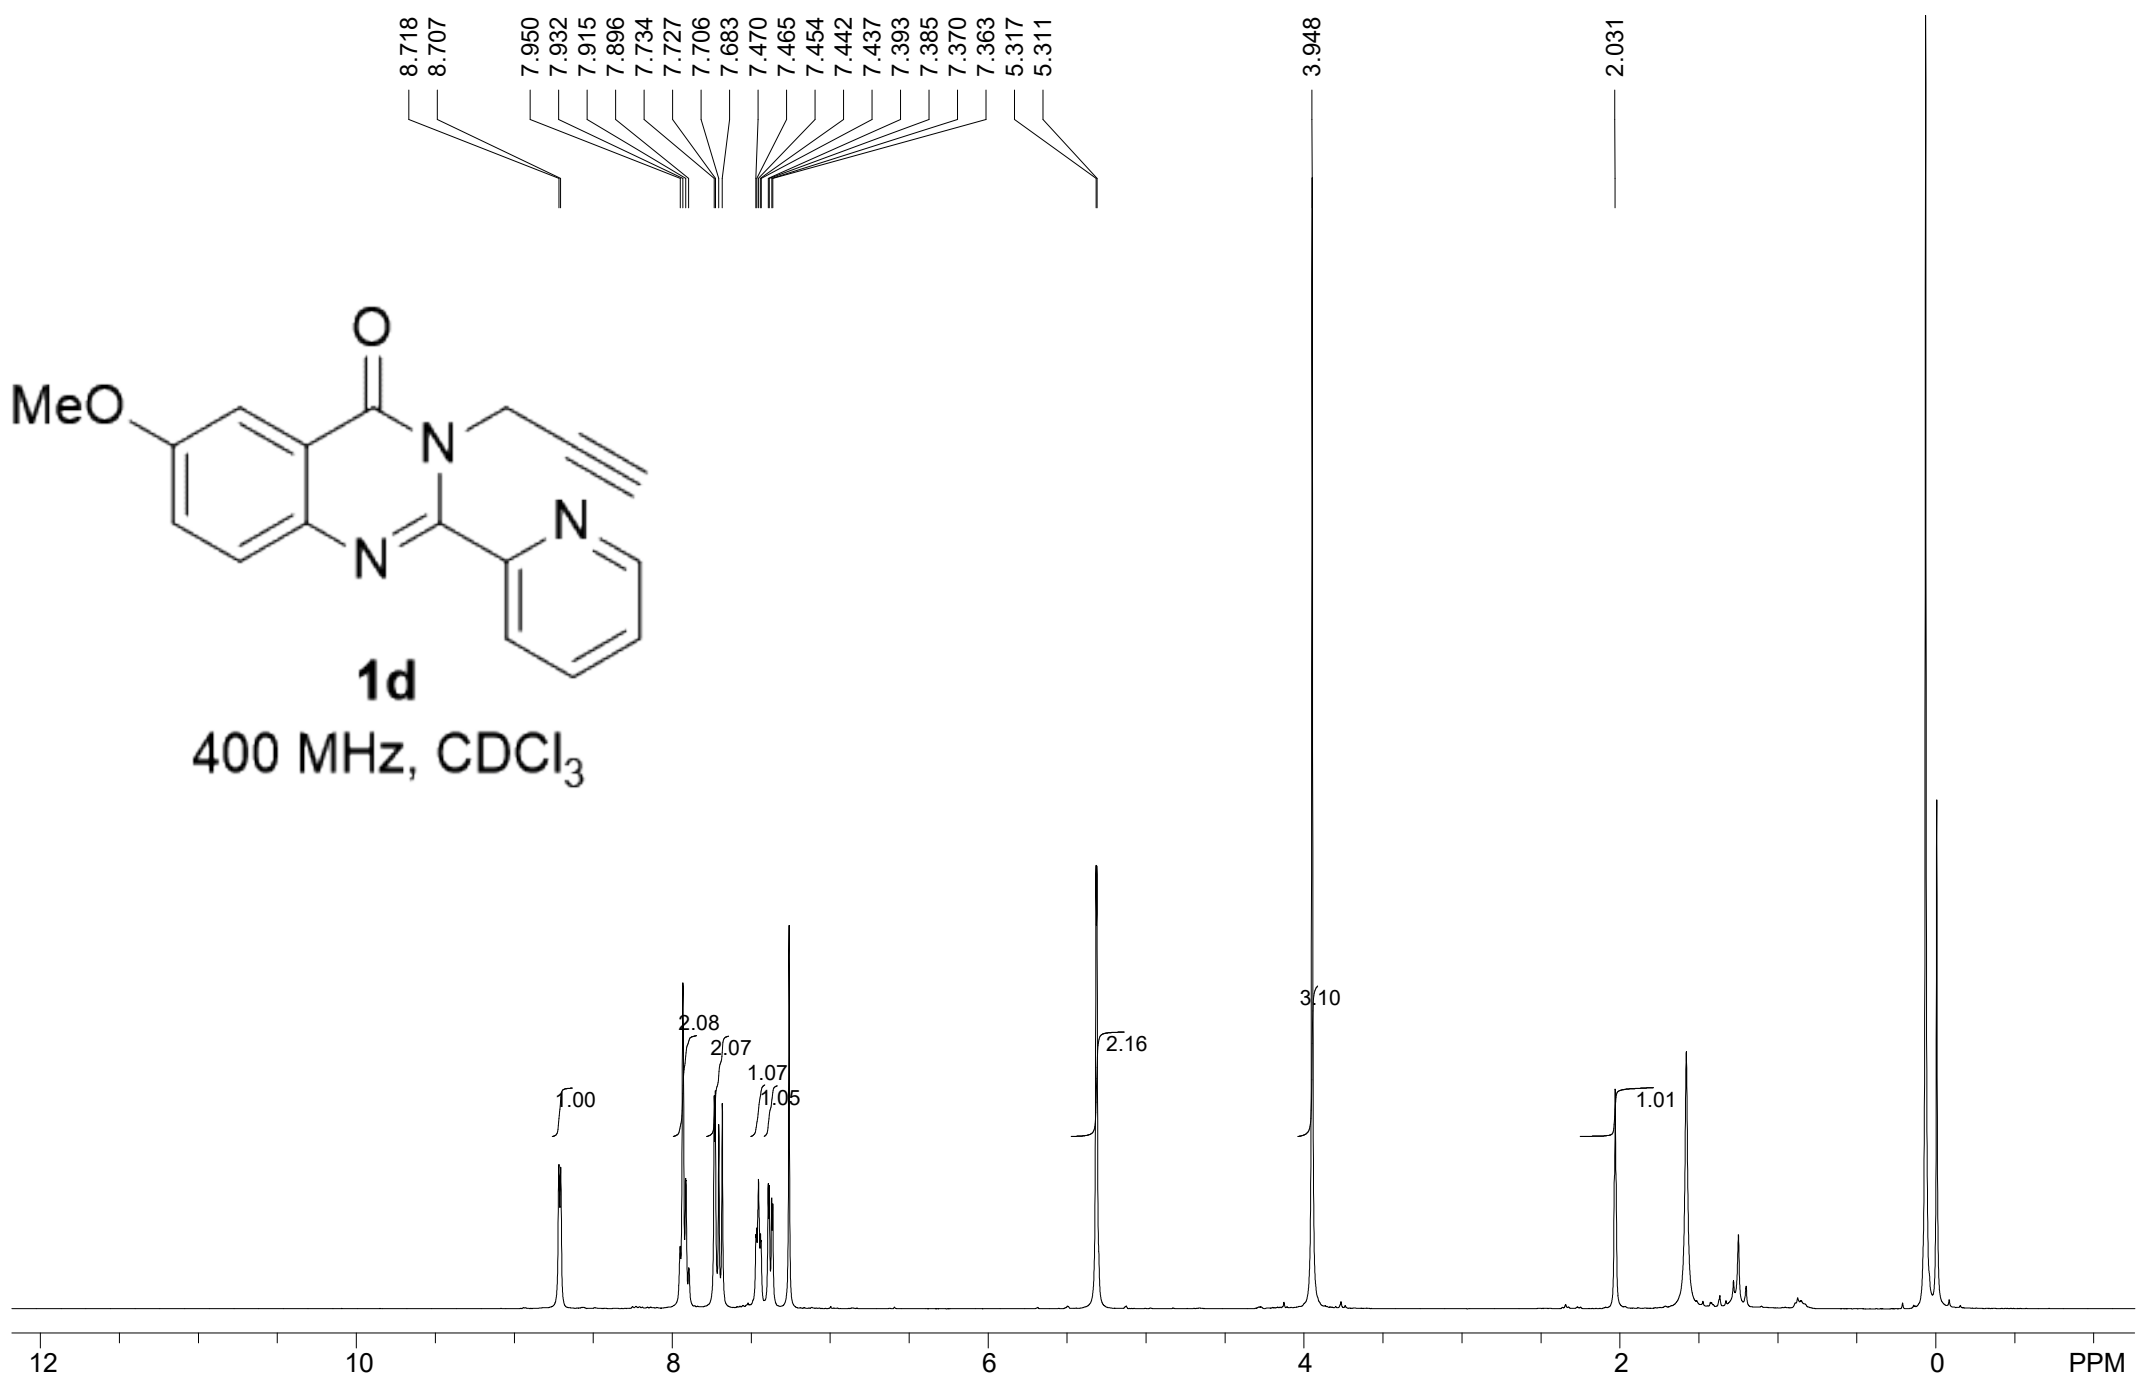

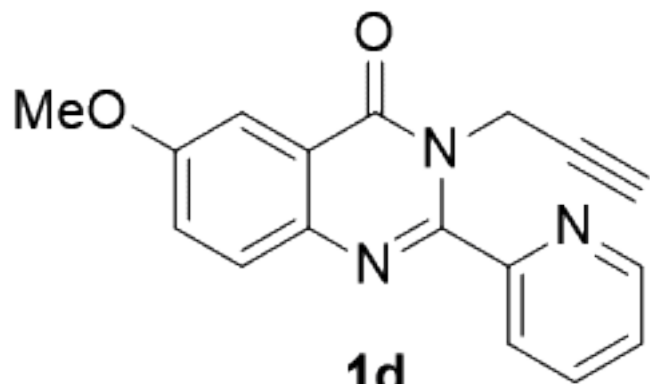

125 MHz, CDCl<sub>3</sub>

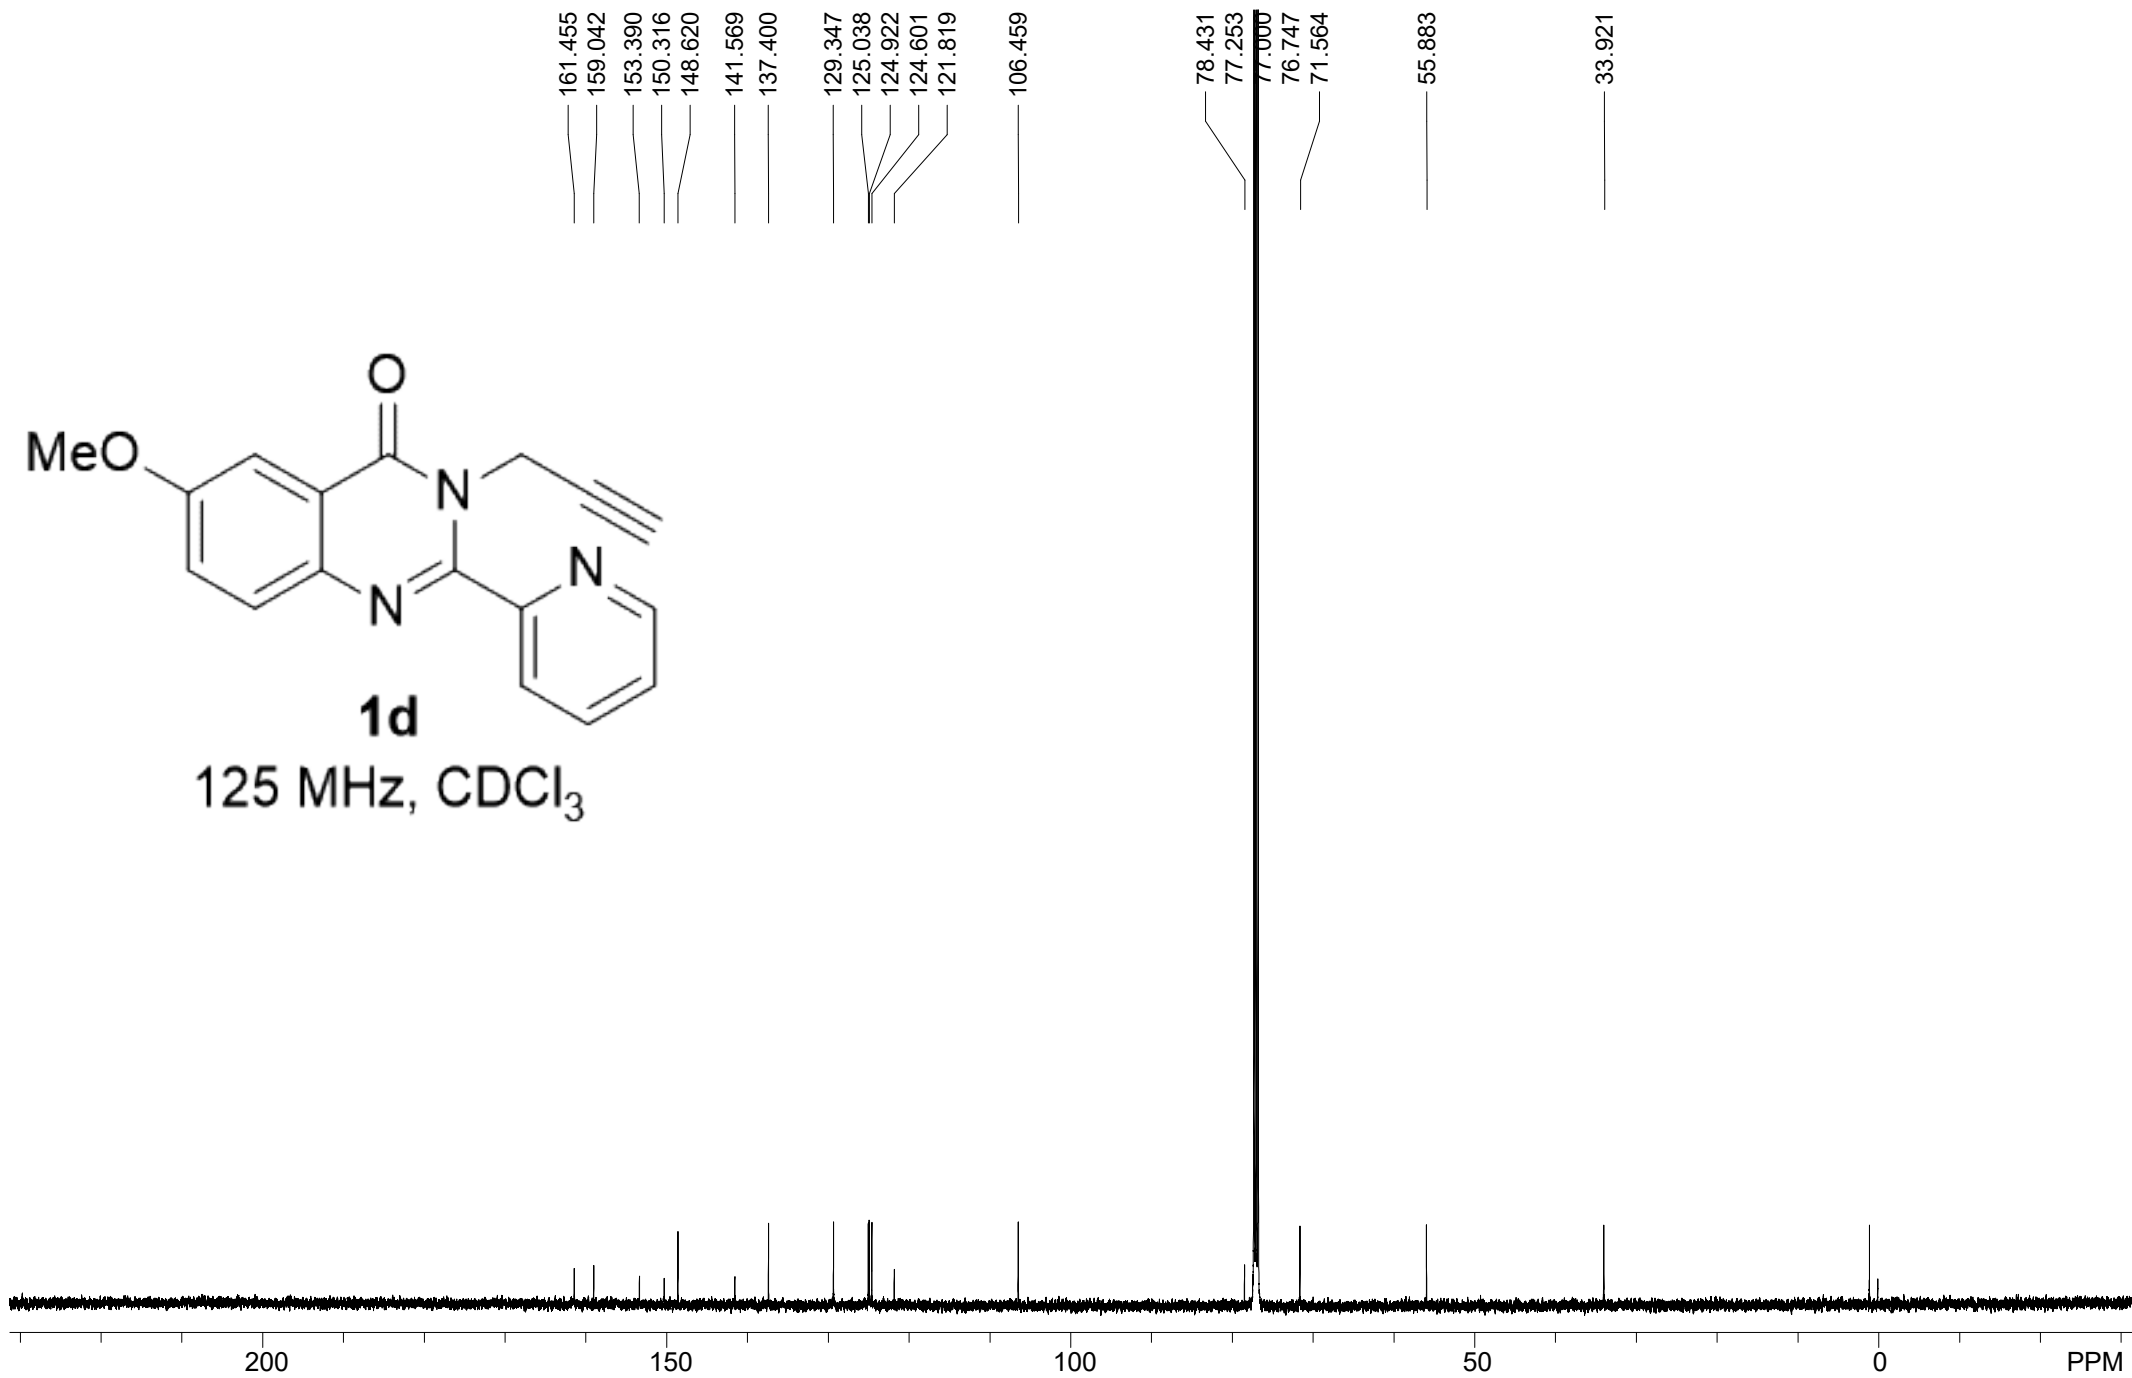

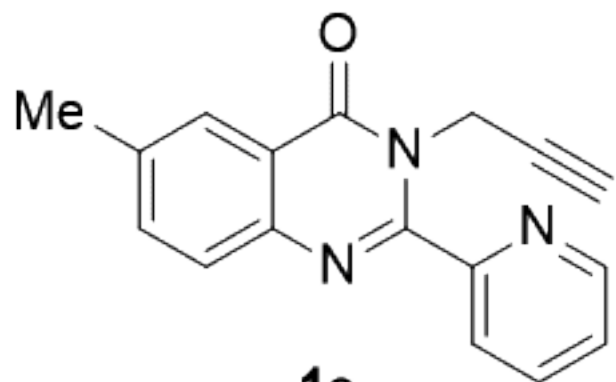

**1e**

400 MHz, CDCl<sub>3</sub>

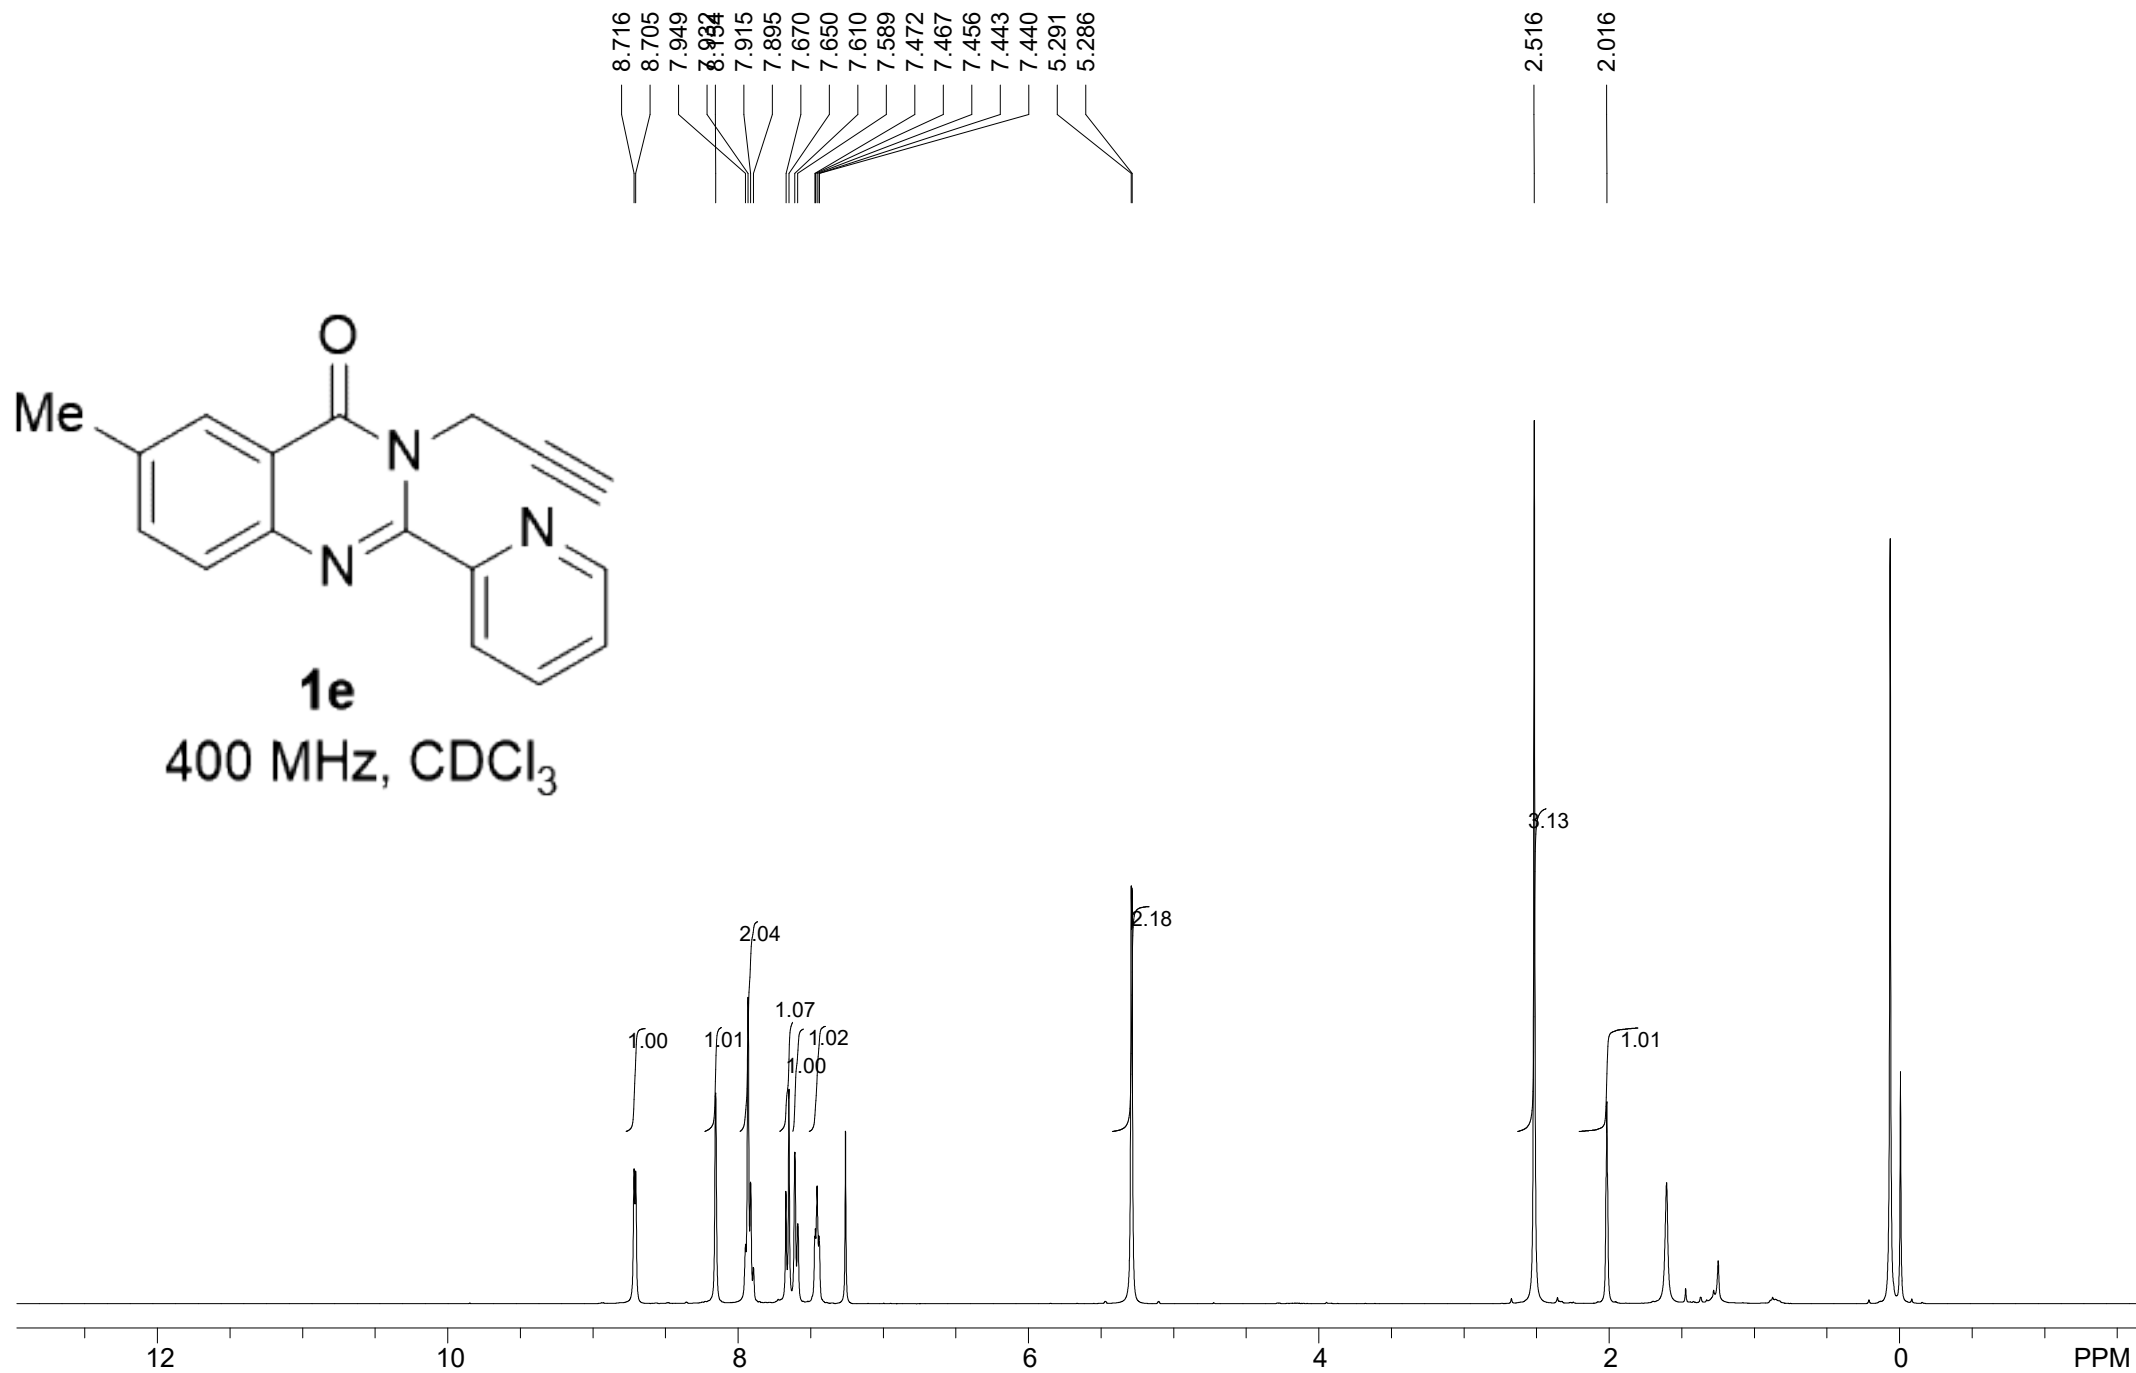

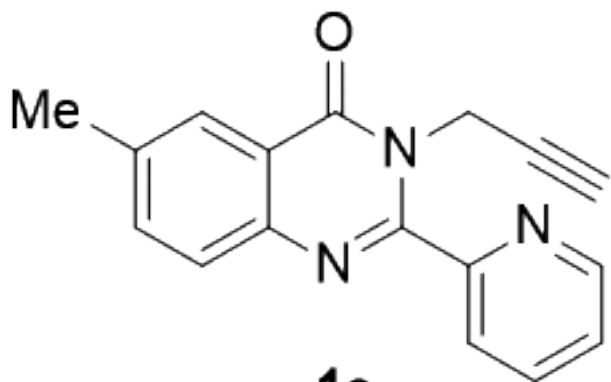

**1e**

125 MHz, CDCl<sub>3</sub>

161.551  
153.398  
151.695  
148.624  
144.948  
137.969  
137.392  
136.065  
127.523  
126.577  
125.026  
124.661  
120.677

78.443  
77.257  
77.000  
76.747  
71.532

33.752

21.418

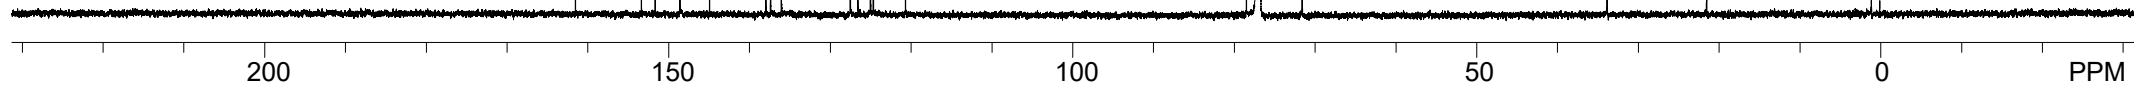

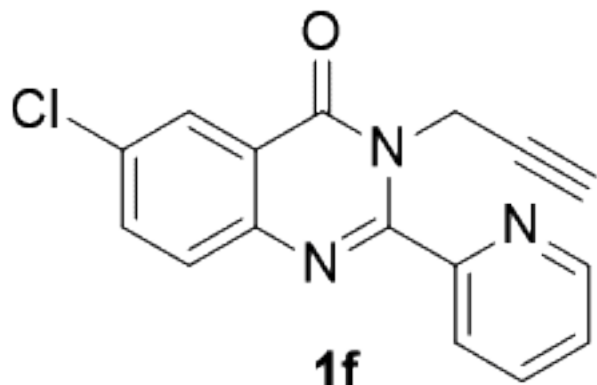

400 MHz, CDCl<sub>3</sub>

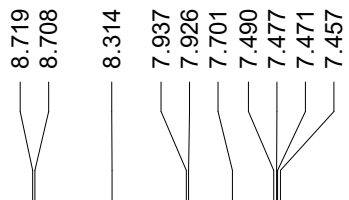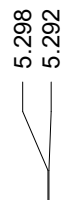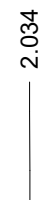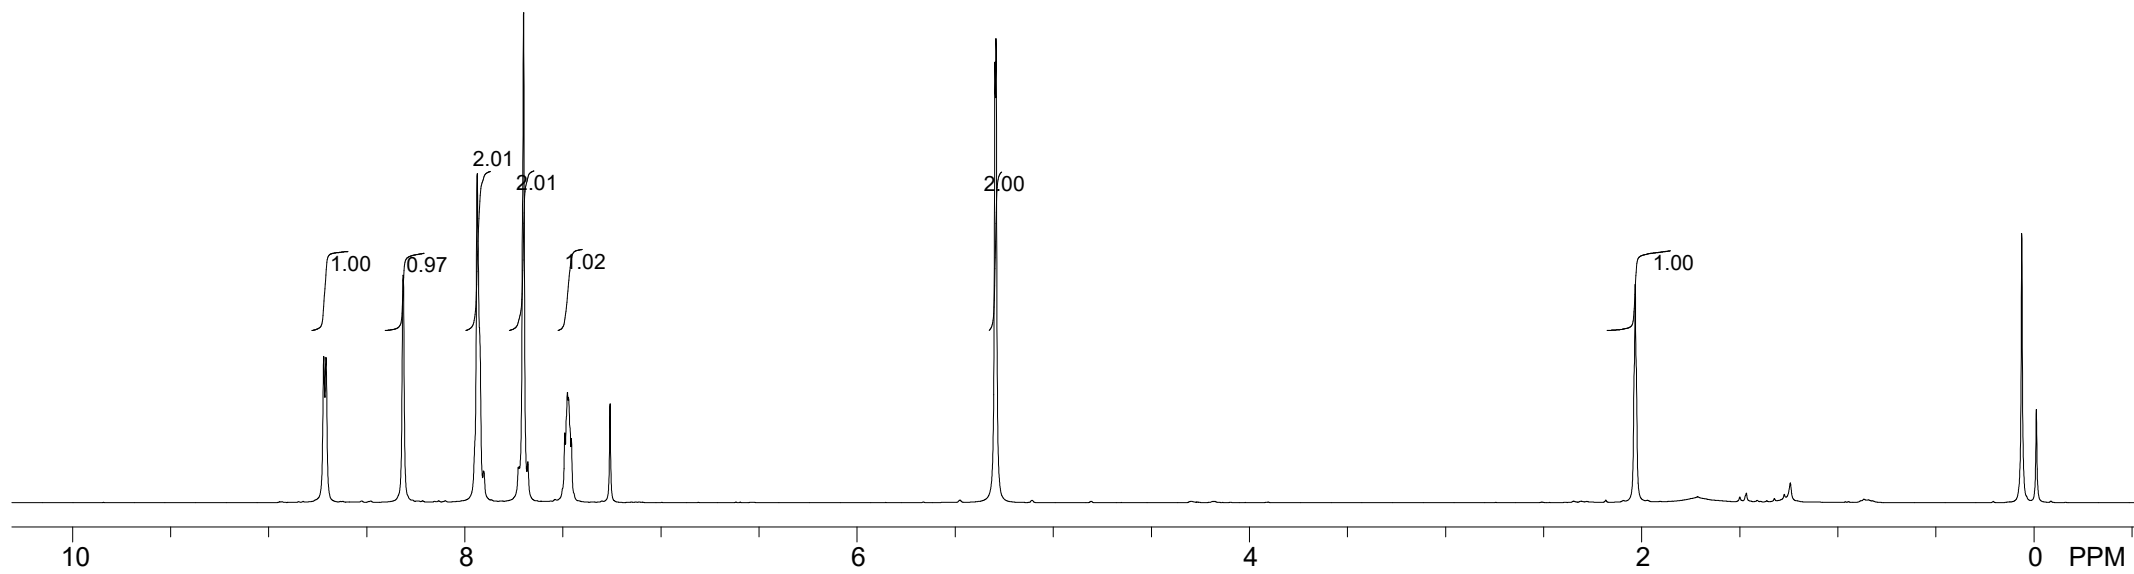



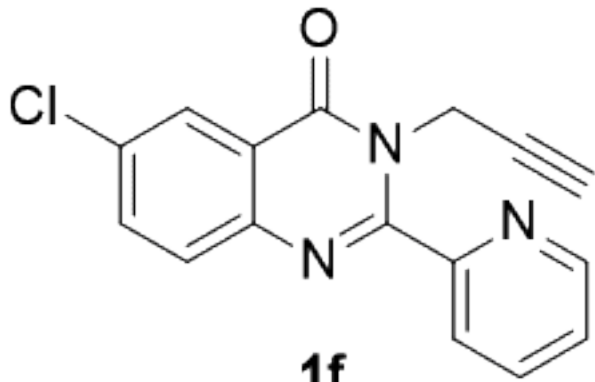

100 MHz, CDCl<sub>3</sub>

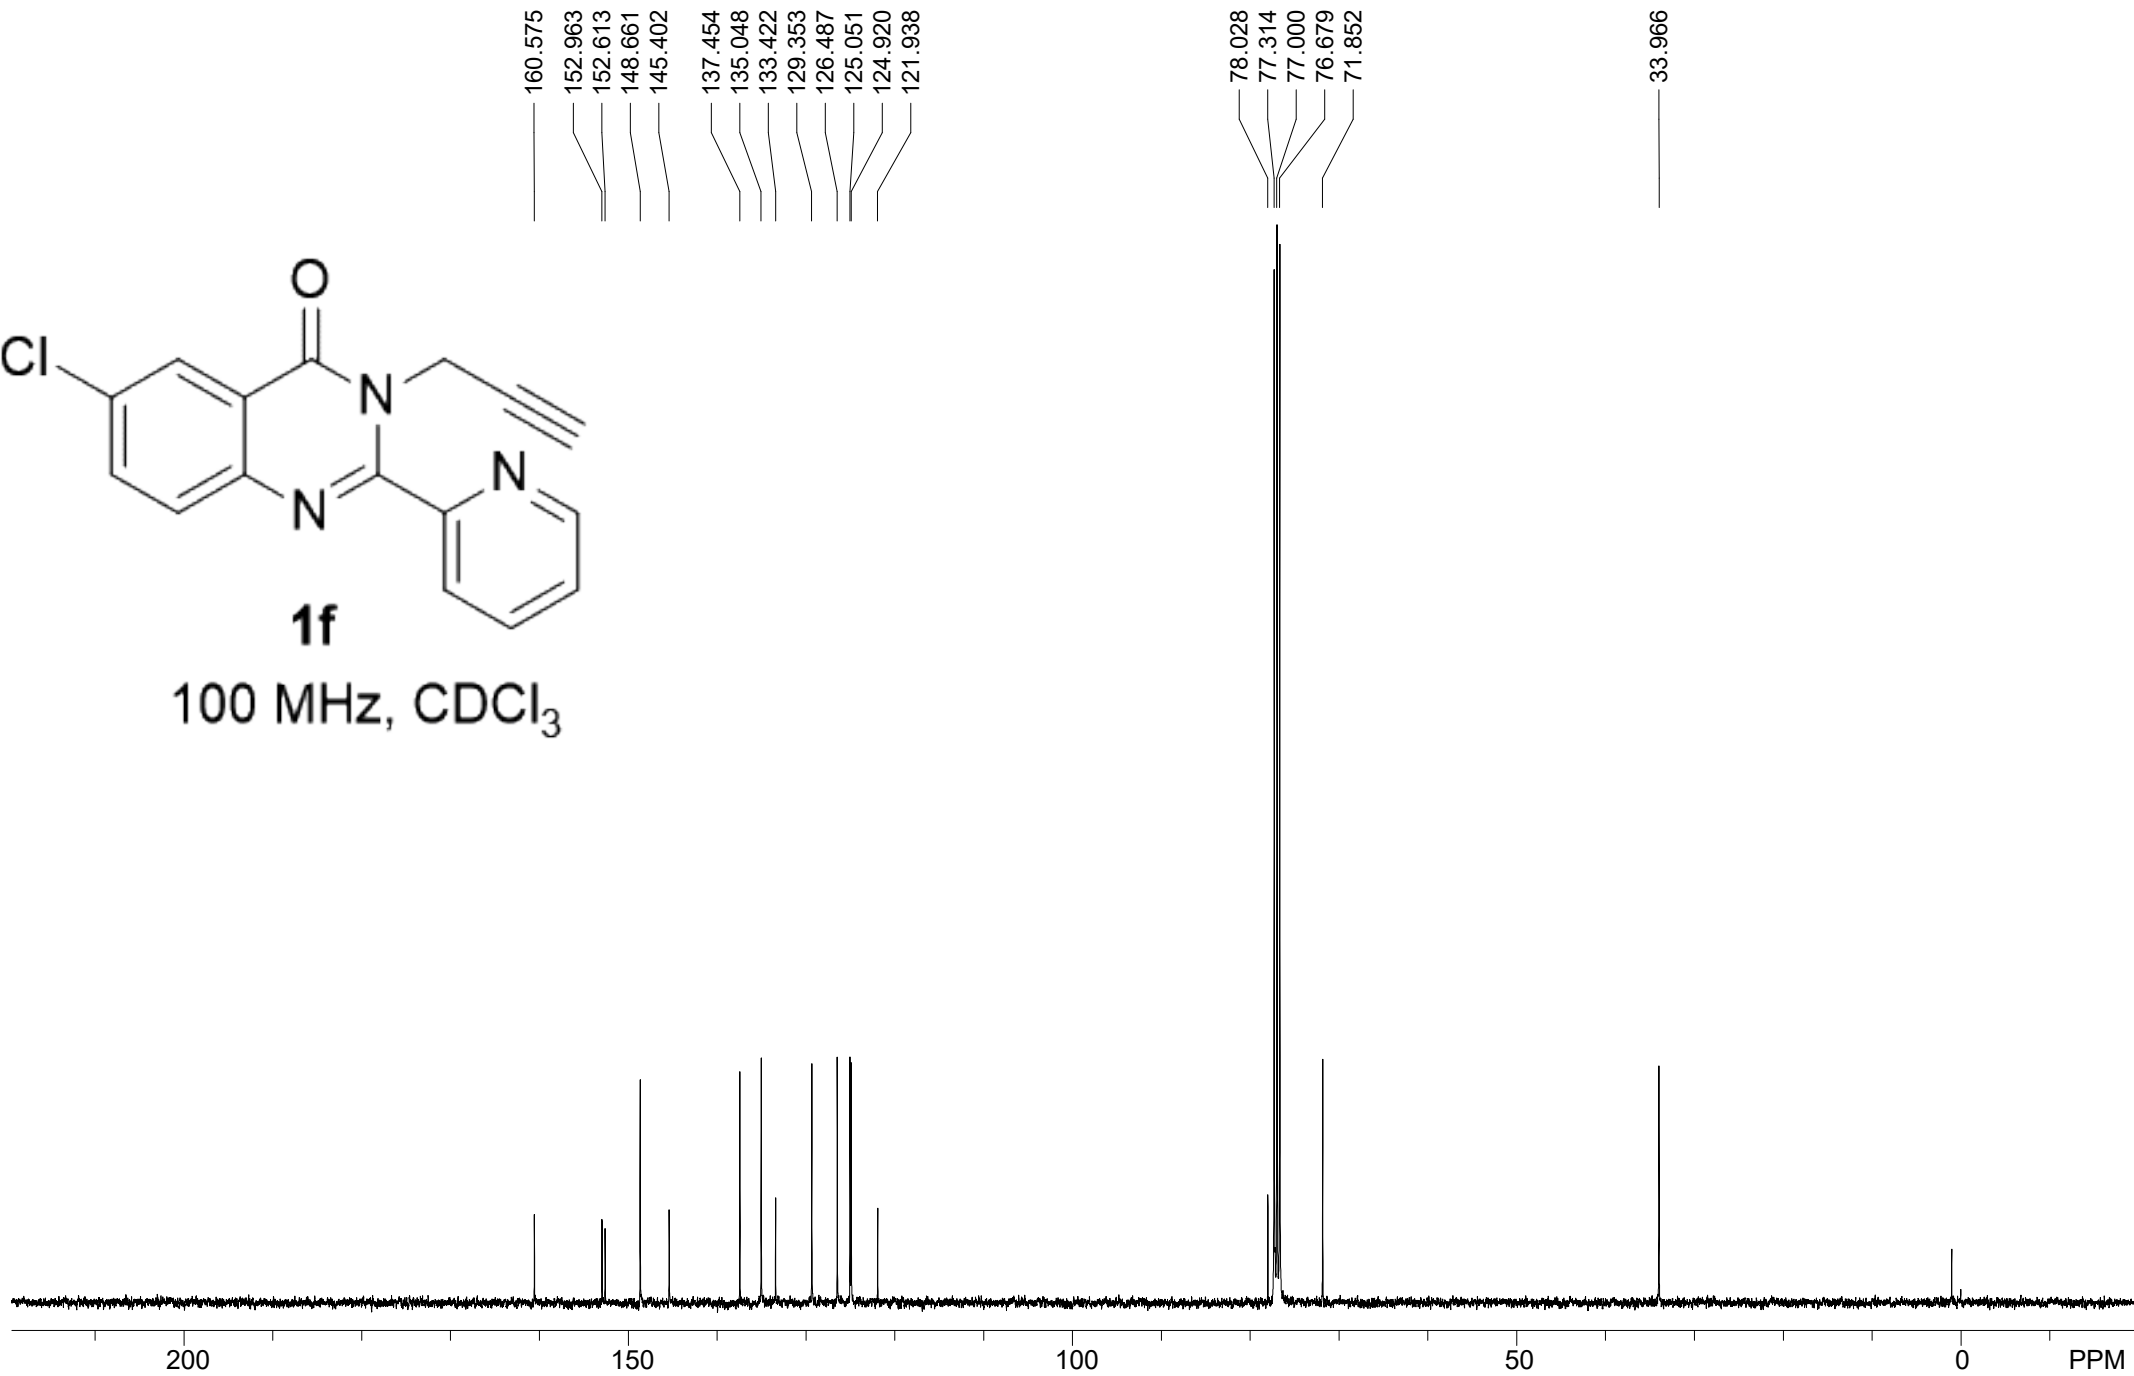

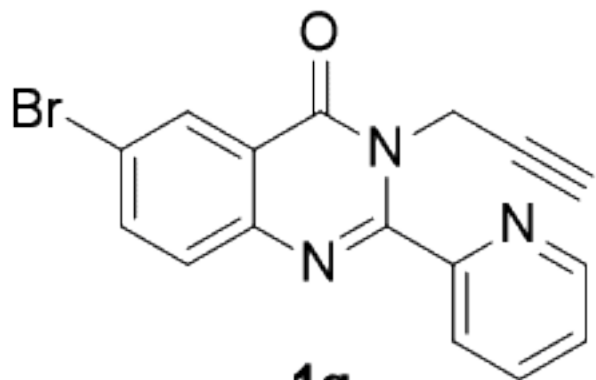

**1g**

400 MHz, CDCl<sub>3</sub>

8.722  
8.710  
8.488  
8.484  
7.940  
7.928  
7.870  
7.865  
7.848  
7.843  
7.637  
7.616  
7.494  
7.481  
7.476

5.301  
5.295

2.033

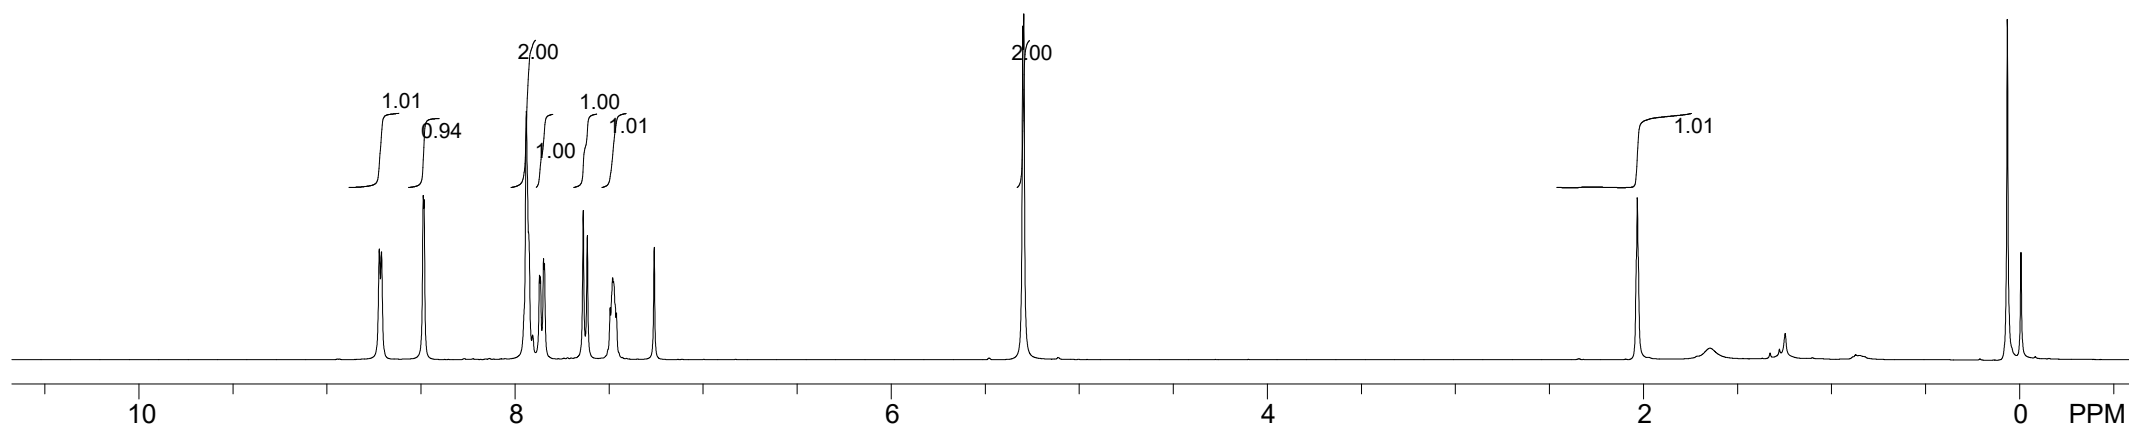

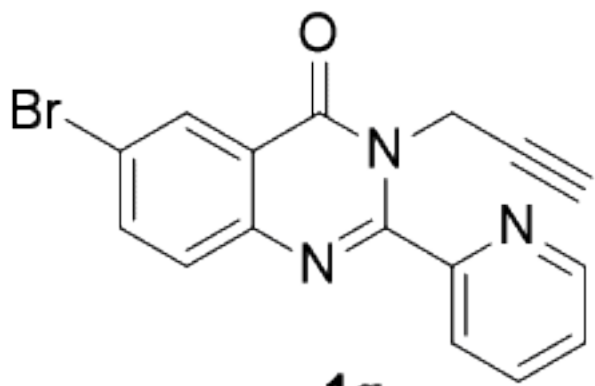

**1g**

100 MHz, CDCl<sub>3</sub>

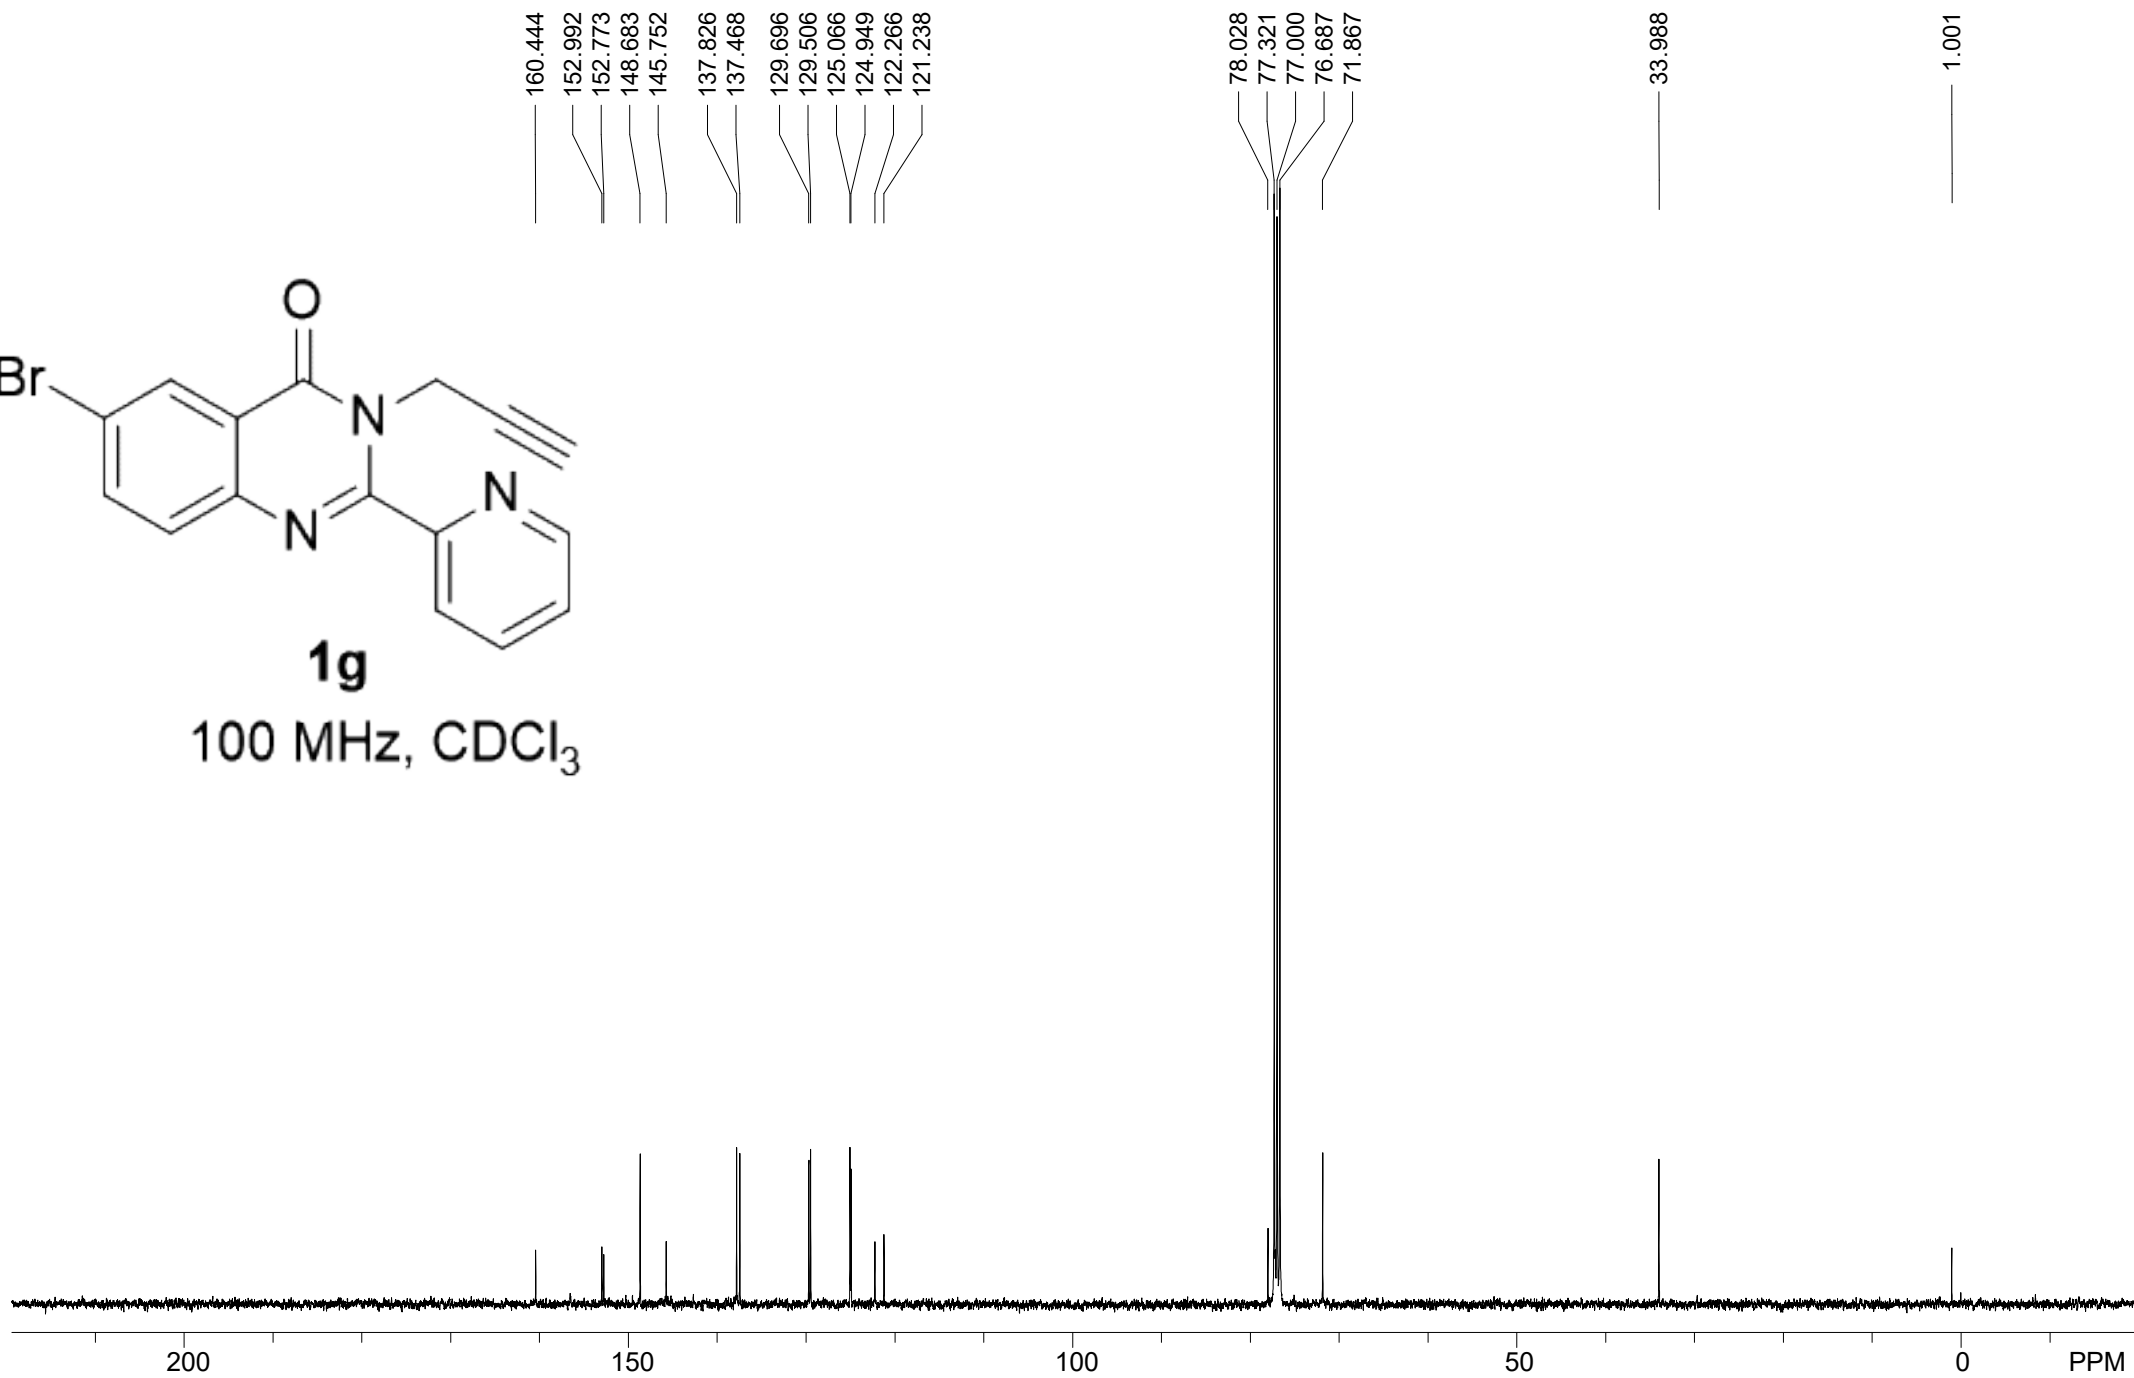

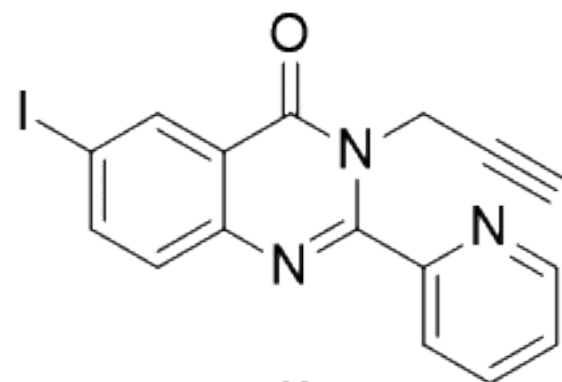

**1h**

400 MHz, CDCl<sub>3</sub>

8.726  
8.709  
8.704  
8.064  
8.059  
8.042  
8.038  
7.944  
7.930  
7.500  
7.491  
7.479  
7.464

5.308  
5.302

2.030

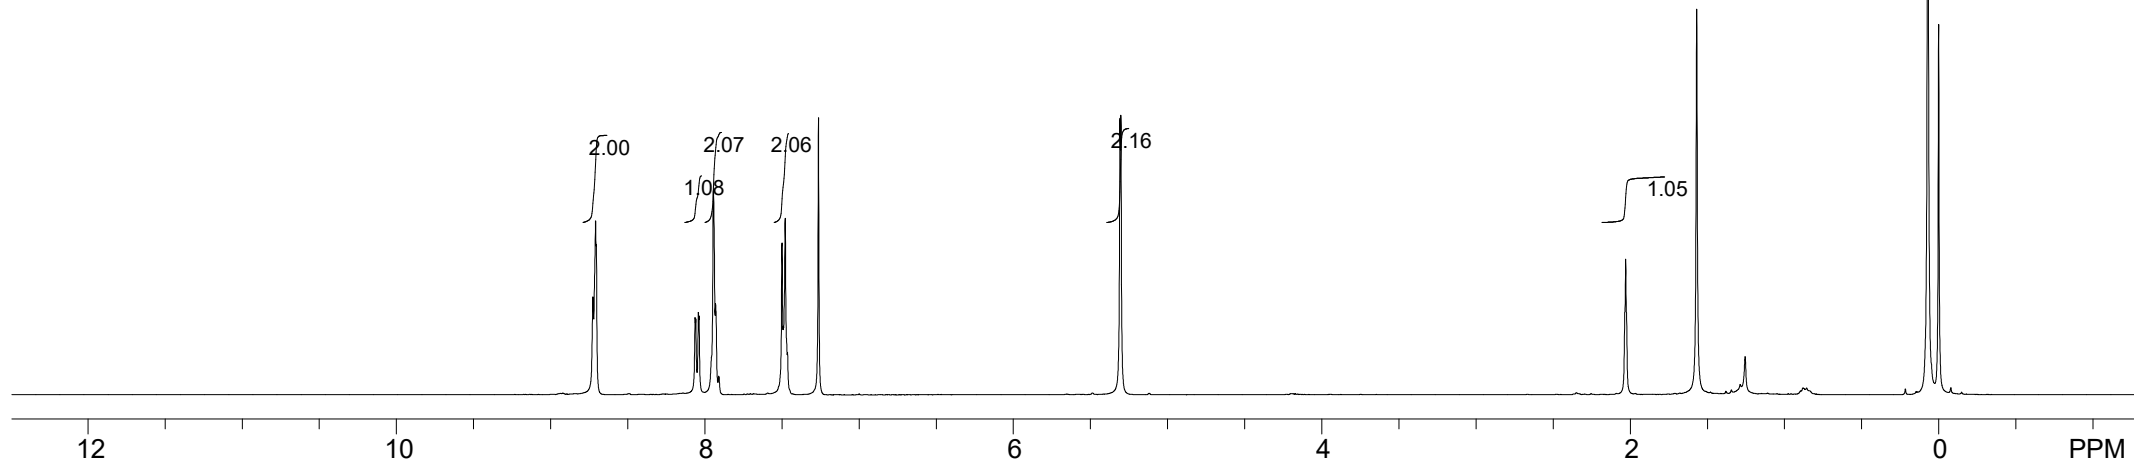

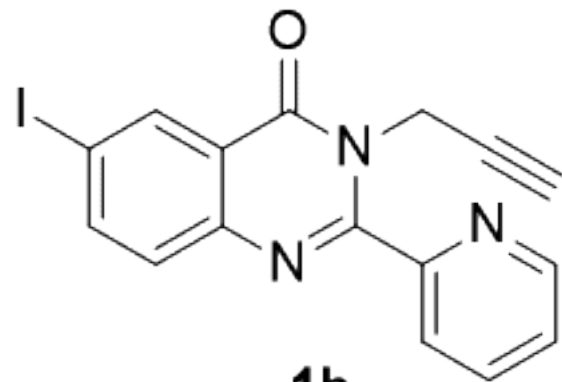

**1h**

125 MHz, CDCl<sub>3</sub>

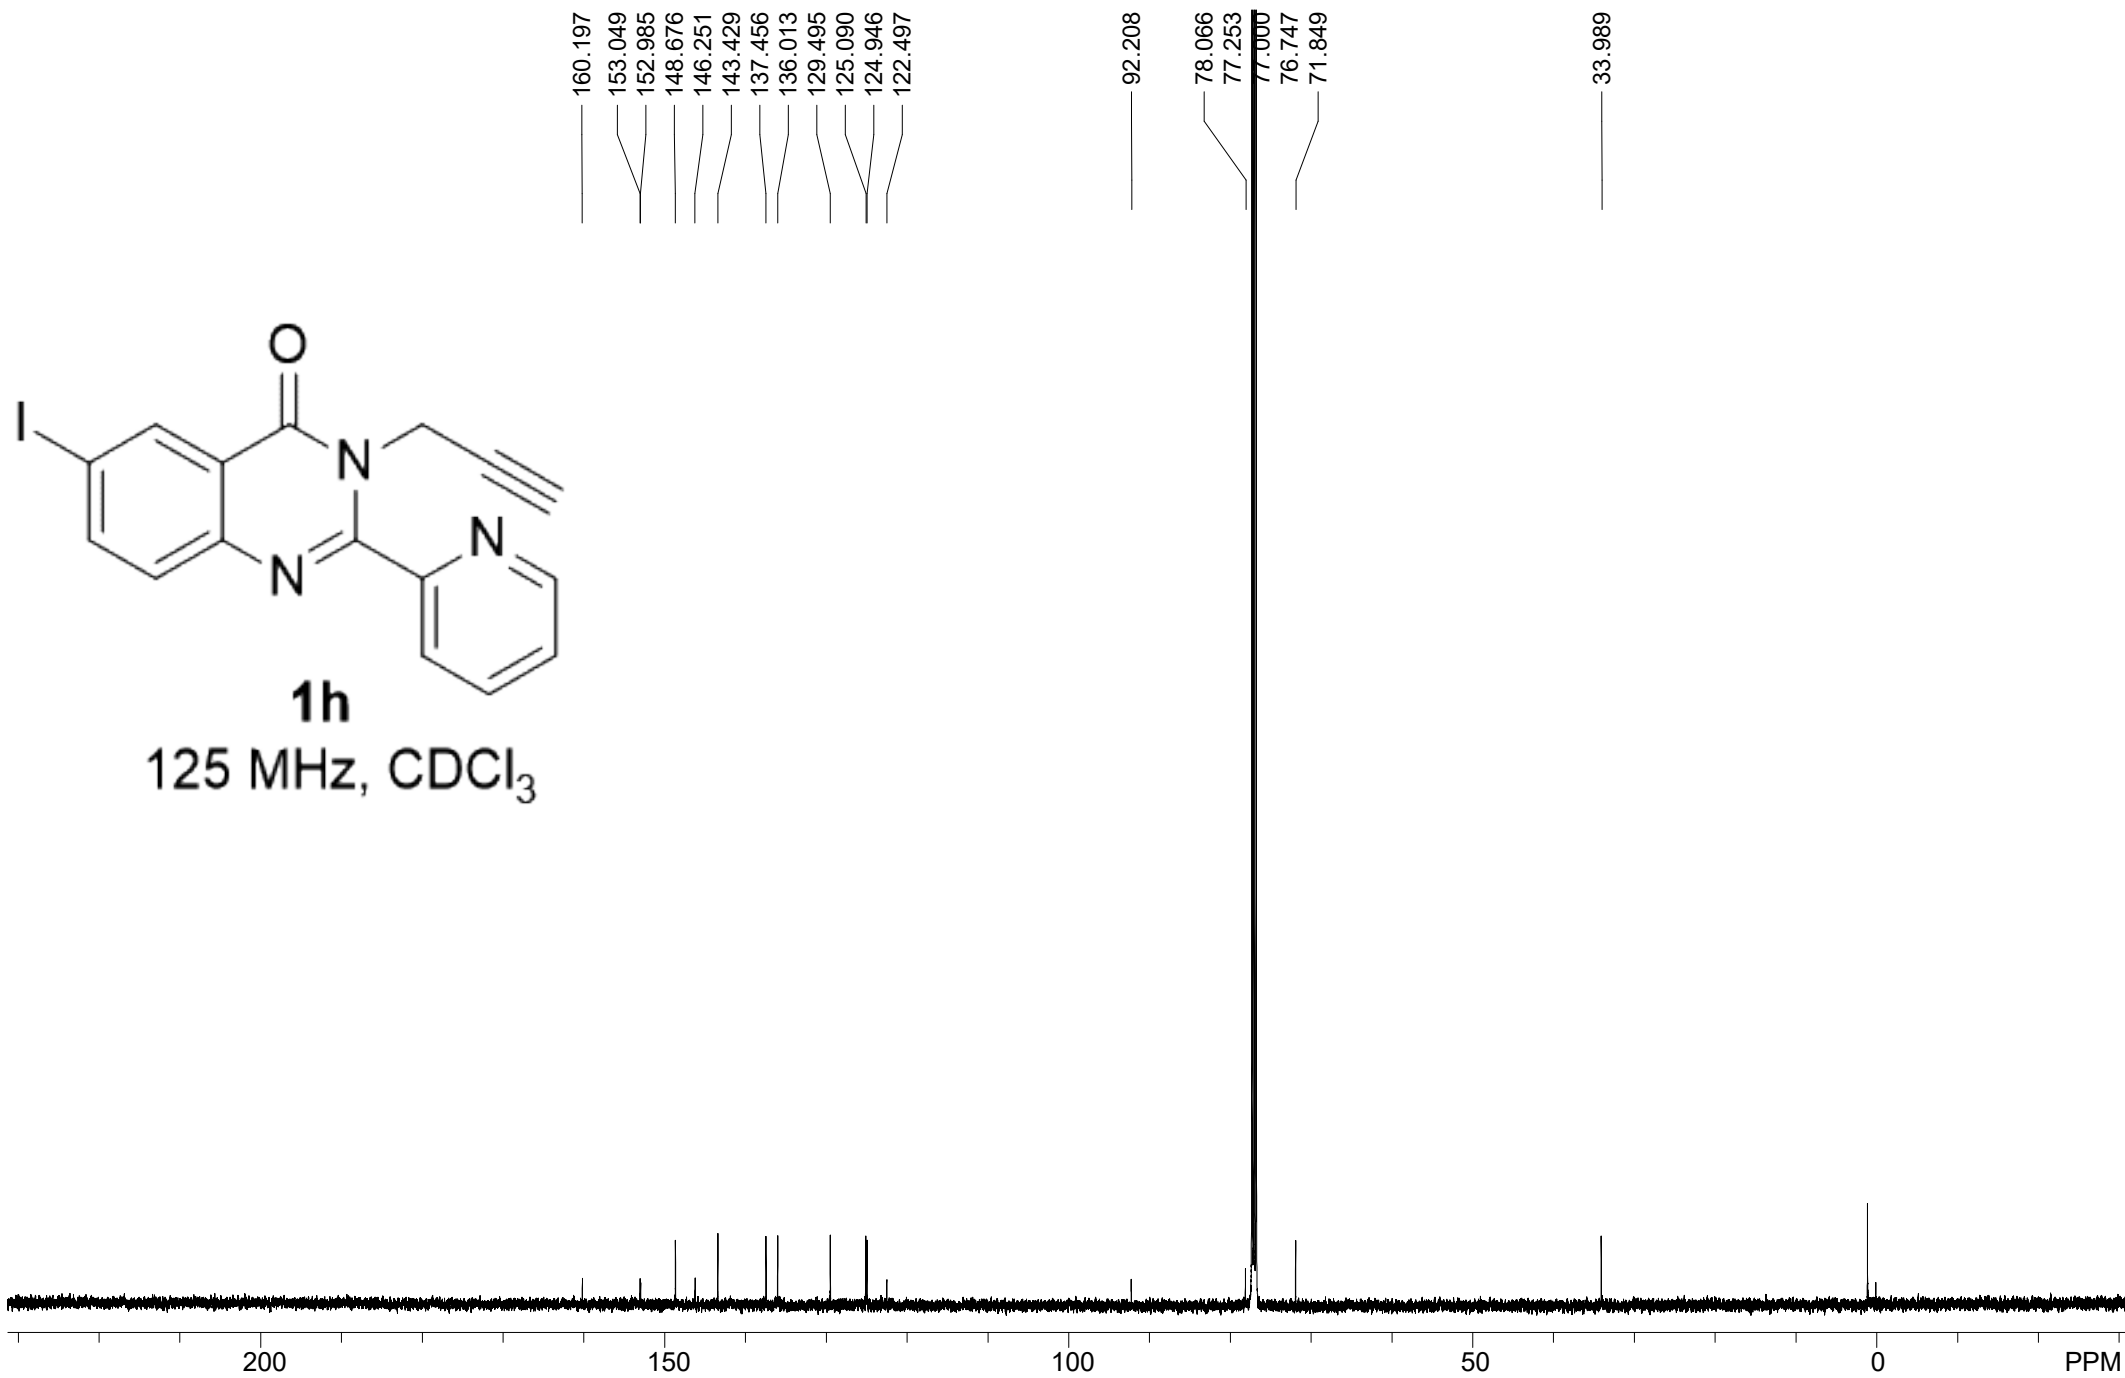

8.729  
8.718  
8.641

7.976  
7.958  
7.939  
7.920  
7.864  
7.842  
7.504  
7.492  
7.479

5.330  
5.326

2.037

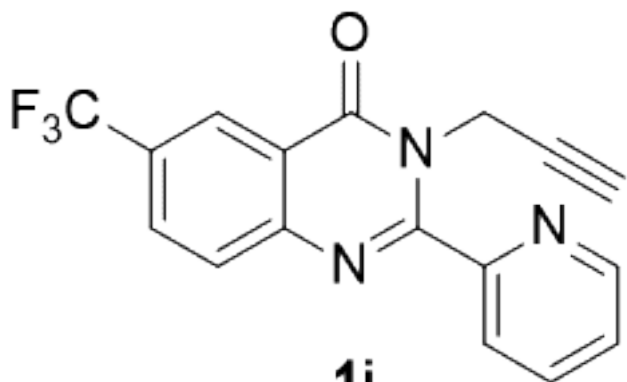

400 MHz, CDCl<sub>3</sub>

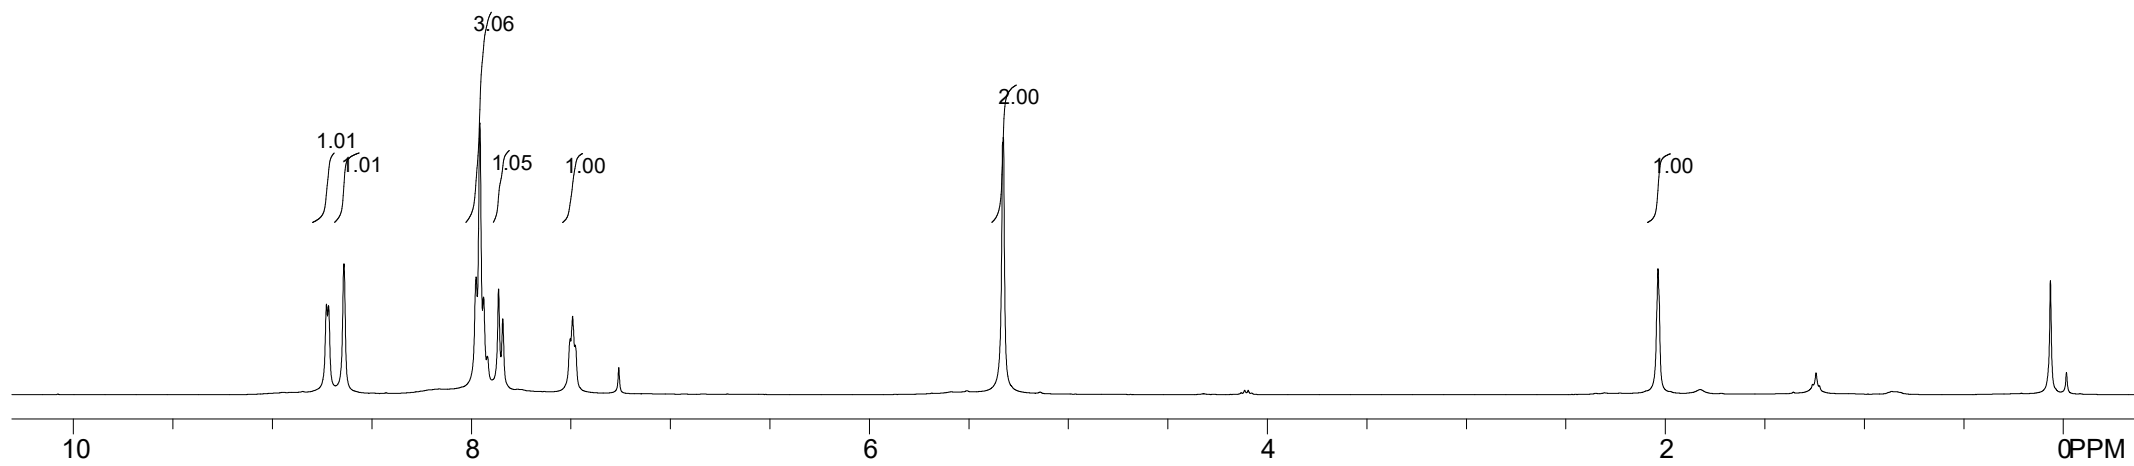

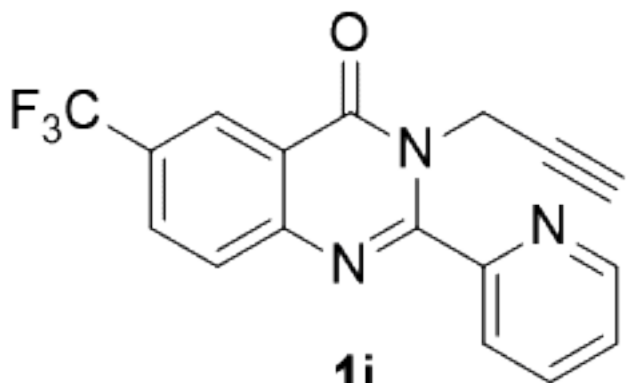

100 MHz, CDCl<sub>3</sub>

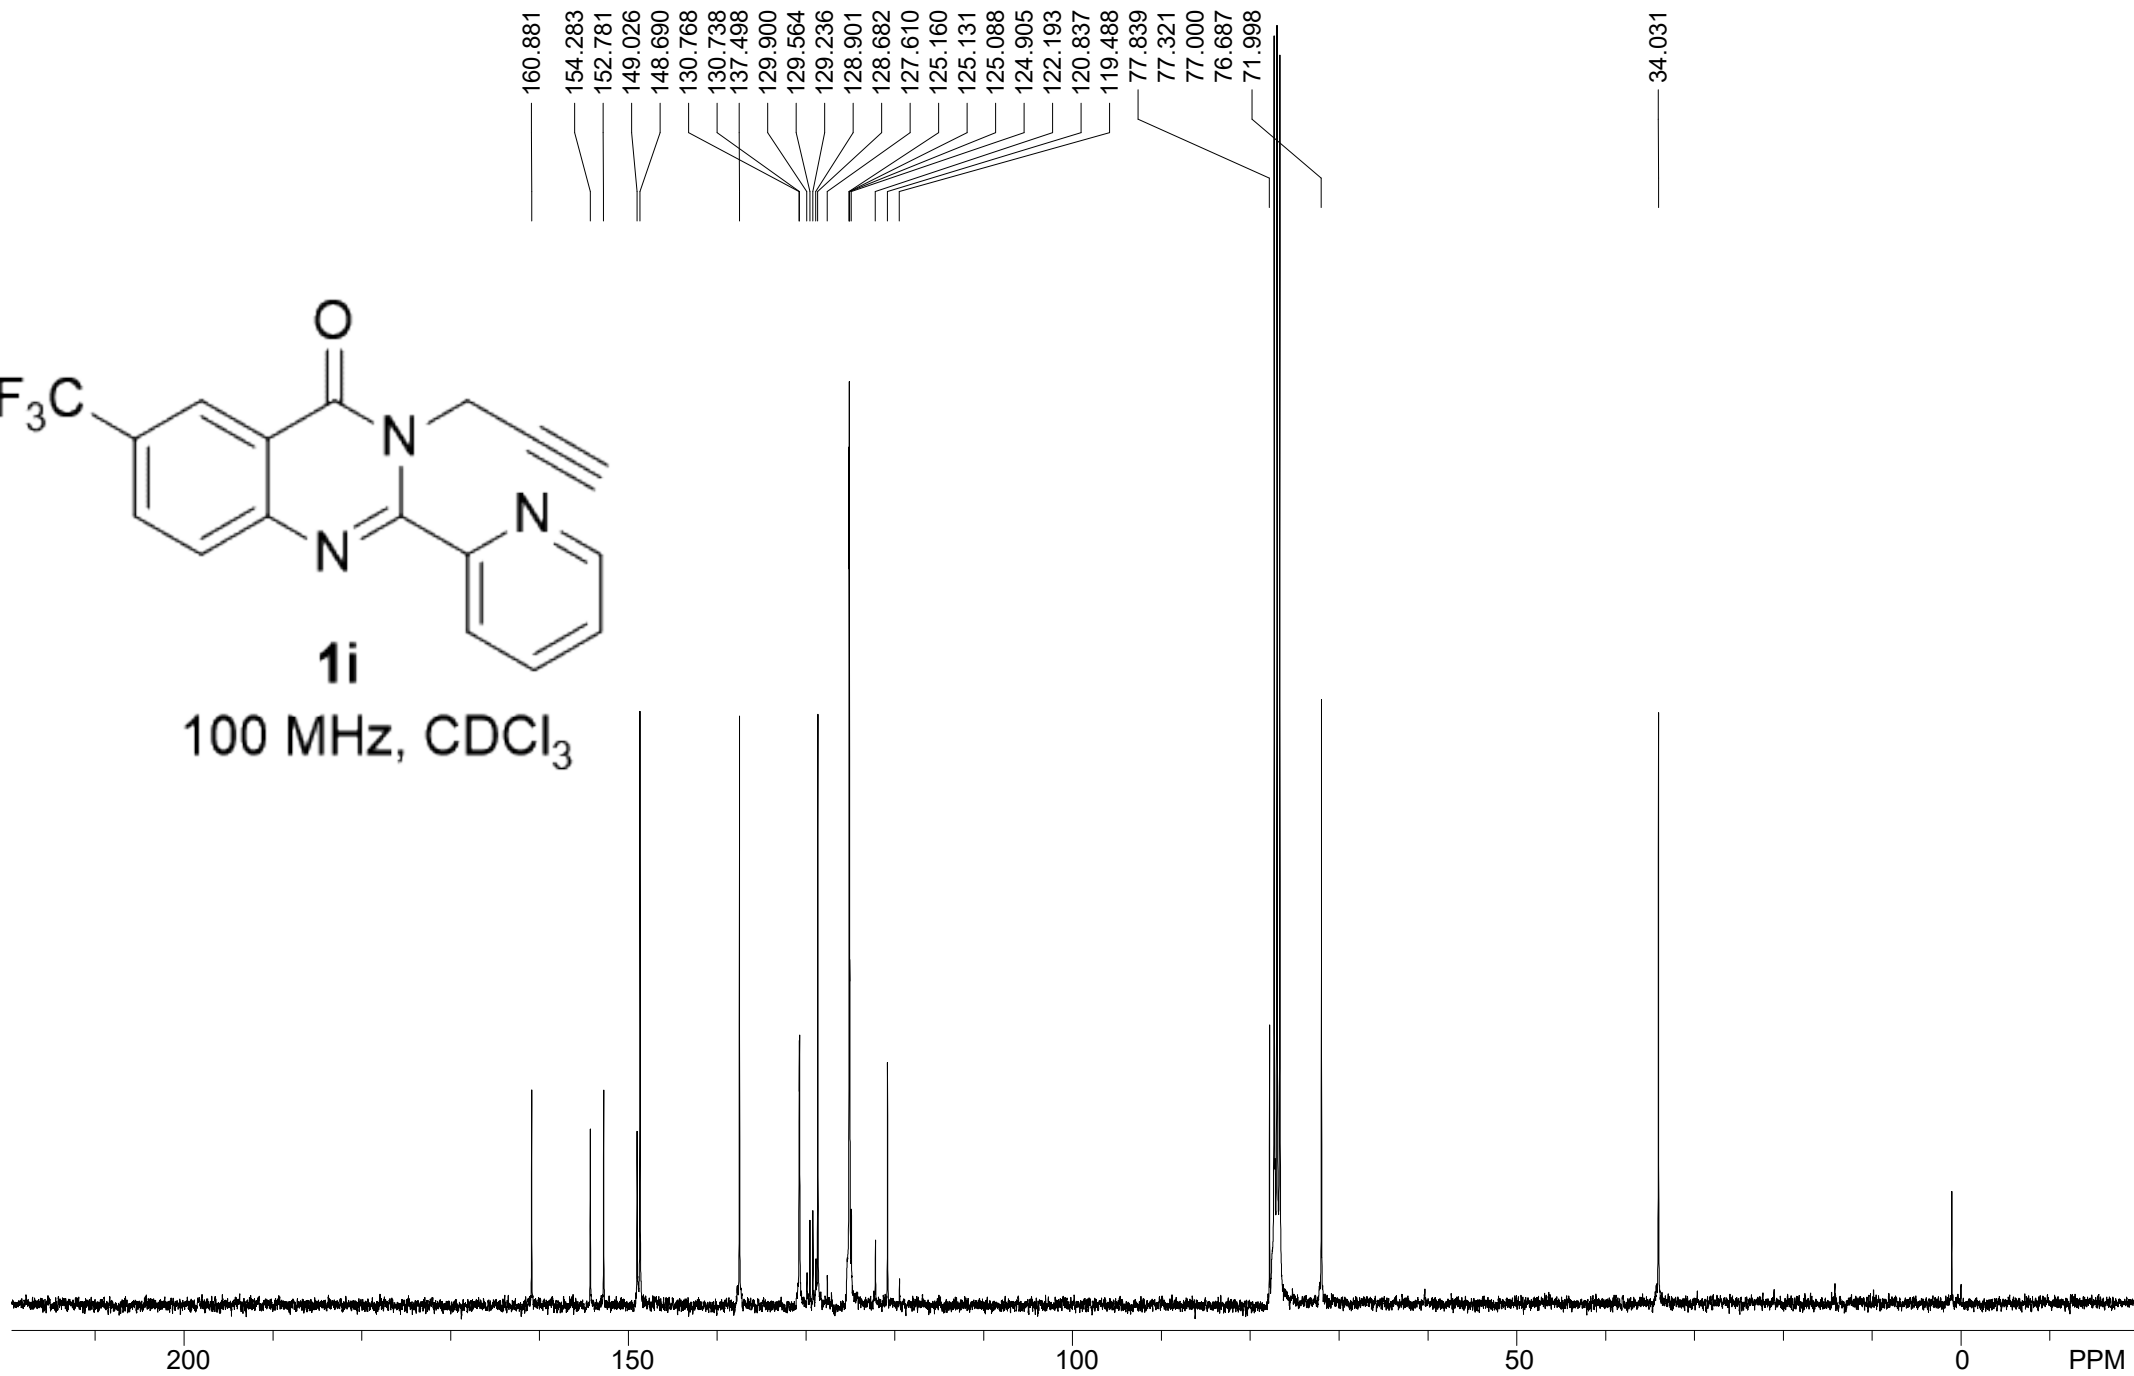

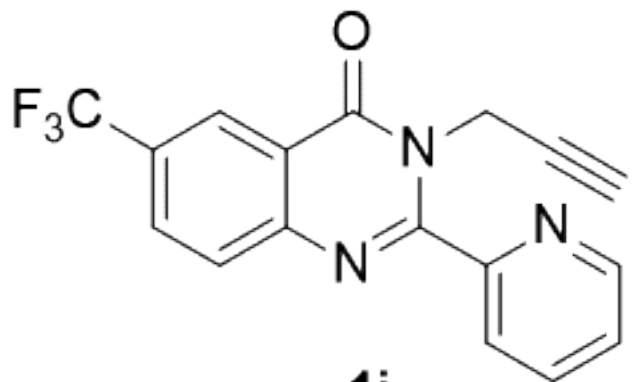

**1i**  
376 MHz, CDCl<sub>3</sub>

62.402

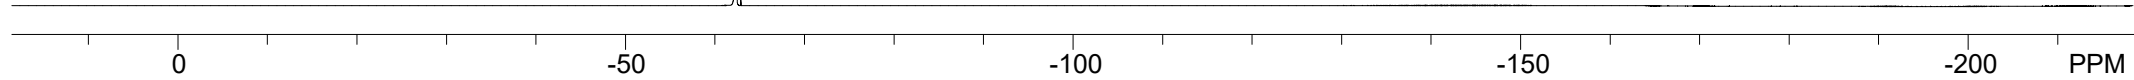



8.716  
8.704  
8.256  
8.234  
7.918  
7.908  
7.460  
7.449  
7.137  
7.132  
7.106  
7.100  
7.084  
7.078  
5.247  
5.242  
3.902  
2.022

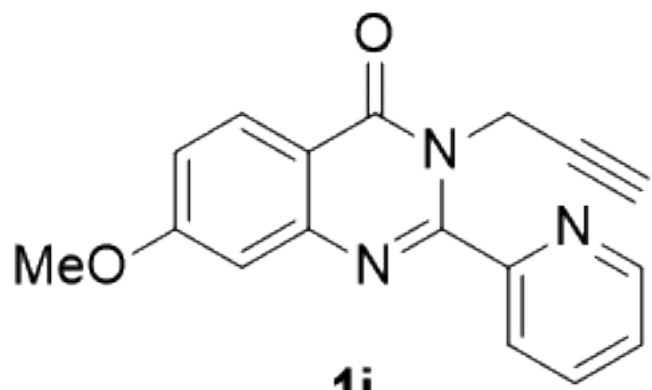

**1j**

400 MHz, CDCl<sub>3</sub>

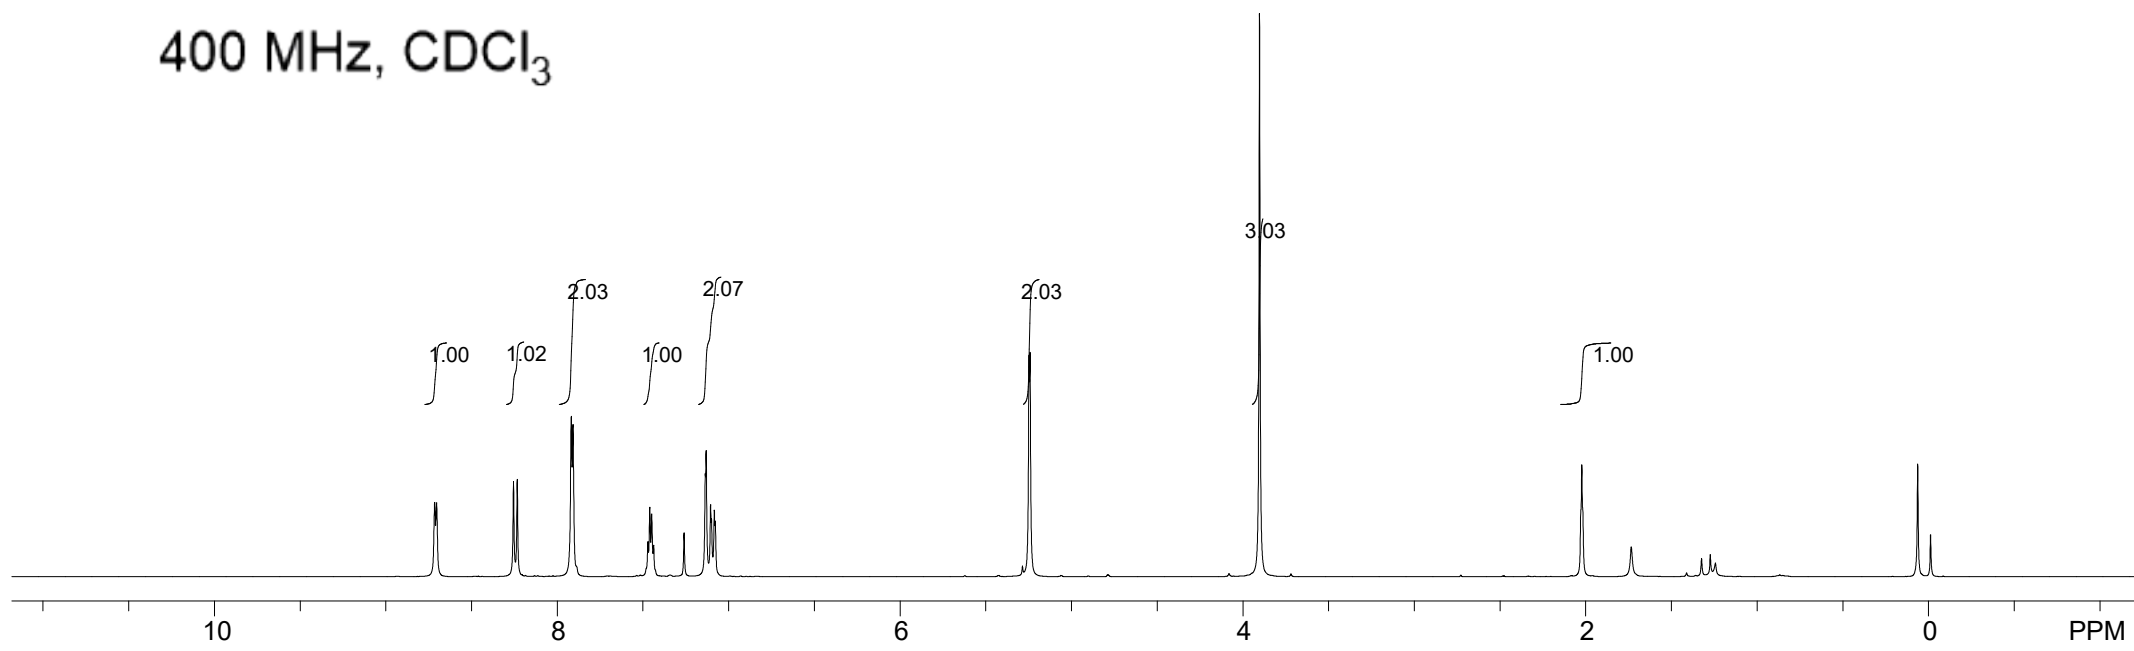

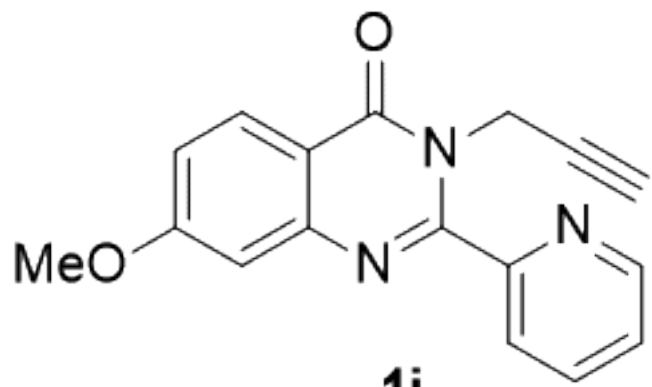

**1j**

100 MHz, CDCl<sub>3</sub>

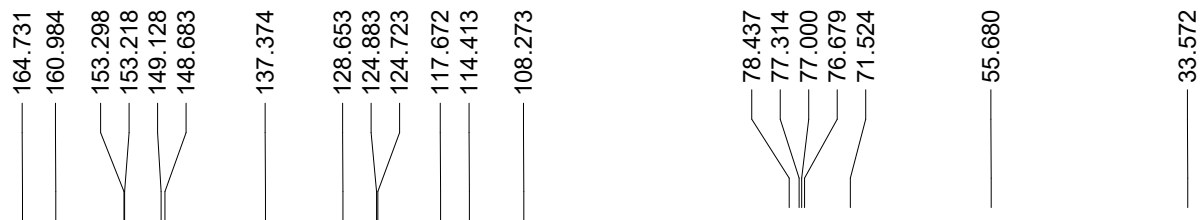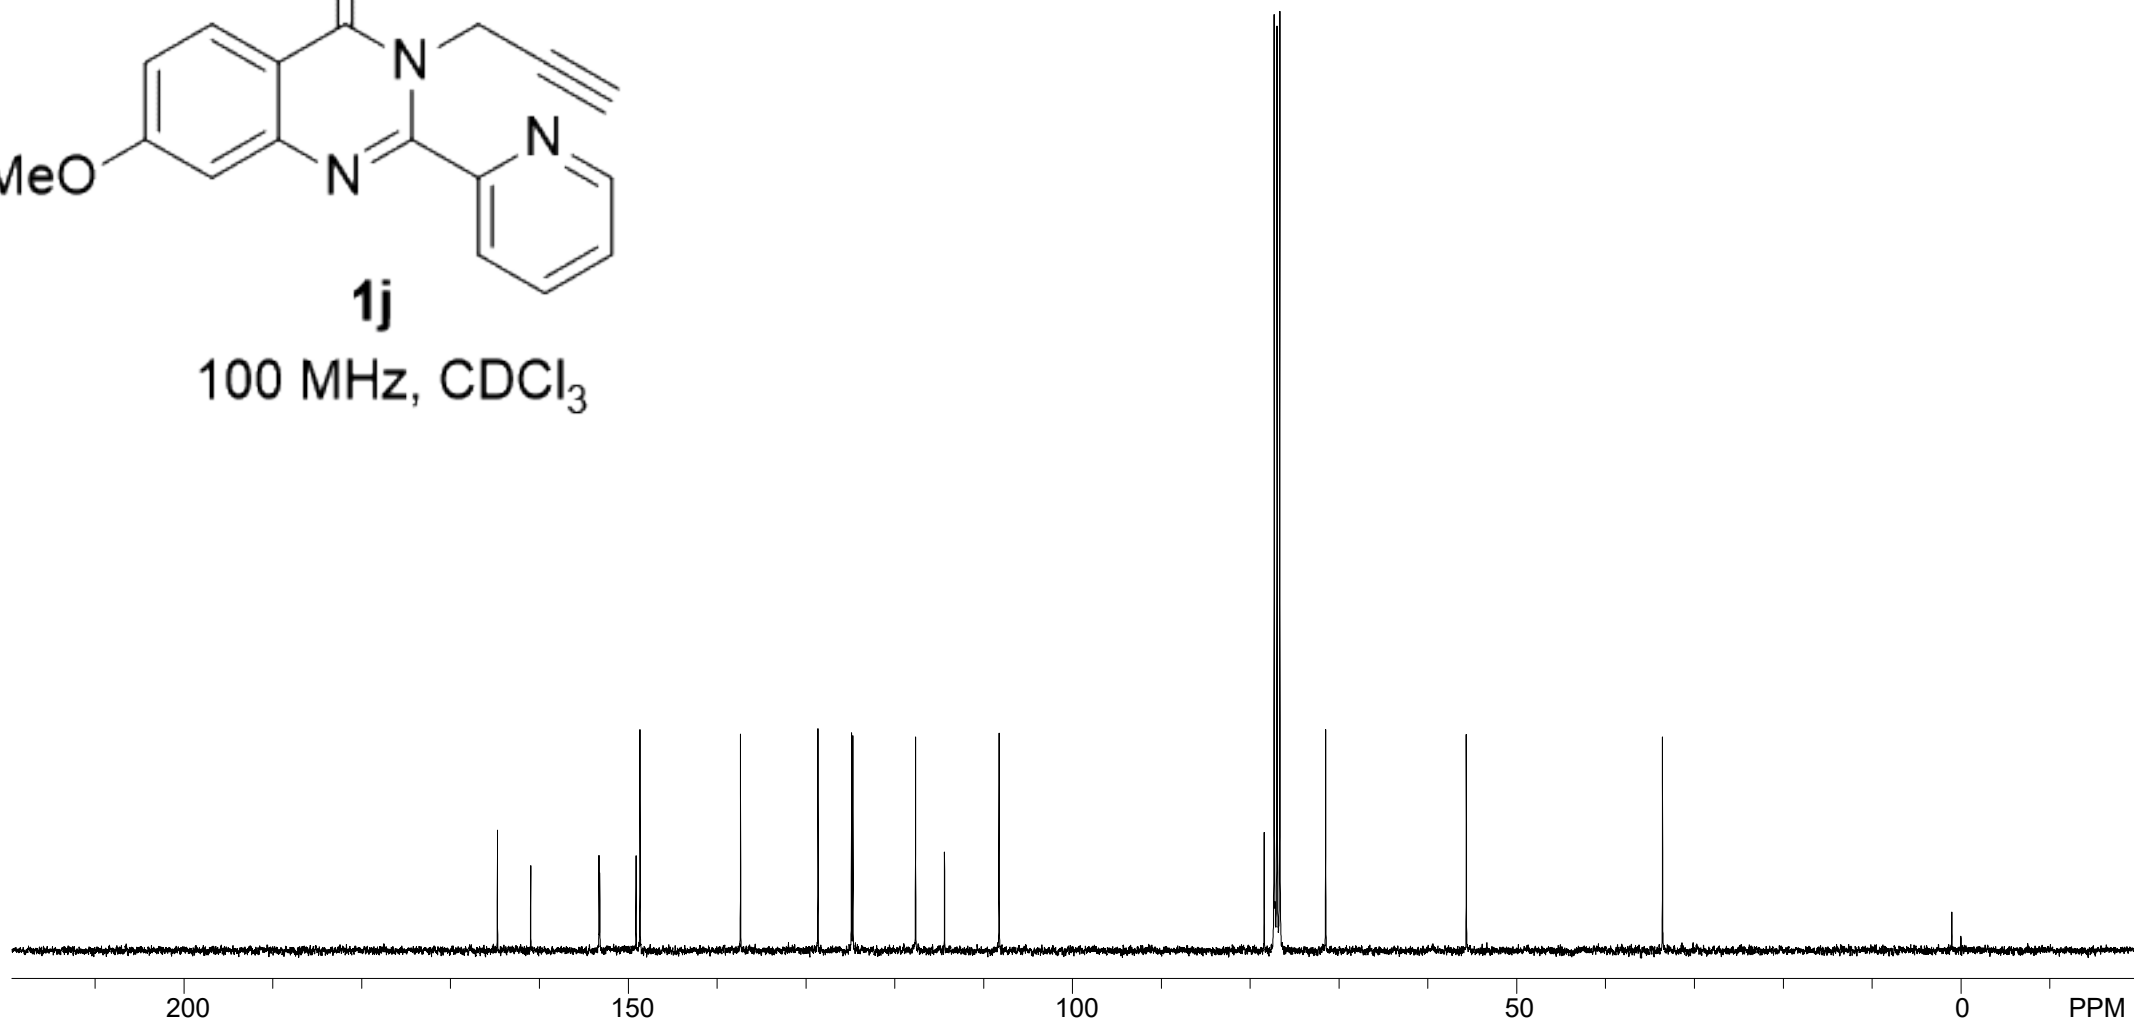

8.716  
8.704  
8.251  
8.231  
7.926  
7.913  
7.893  
7.548  
7.473  
7.459  
7.456  
7.446  
7.440  
7.363  
7.343

5.280  
5.274

2.508

2.015

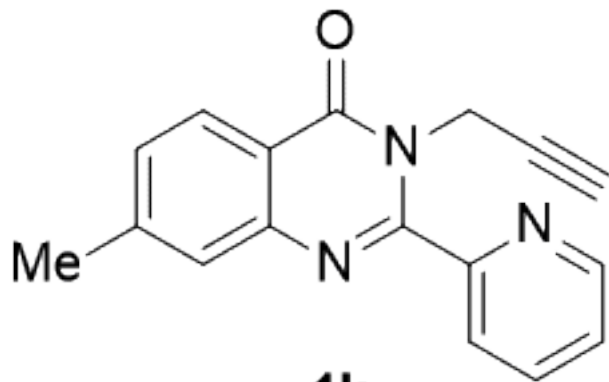

**1k**

400 MHz, CDCl<sub>3</sub>

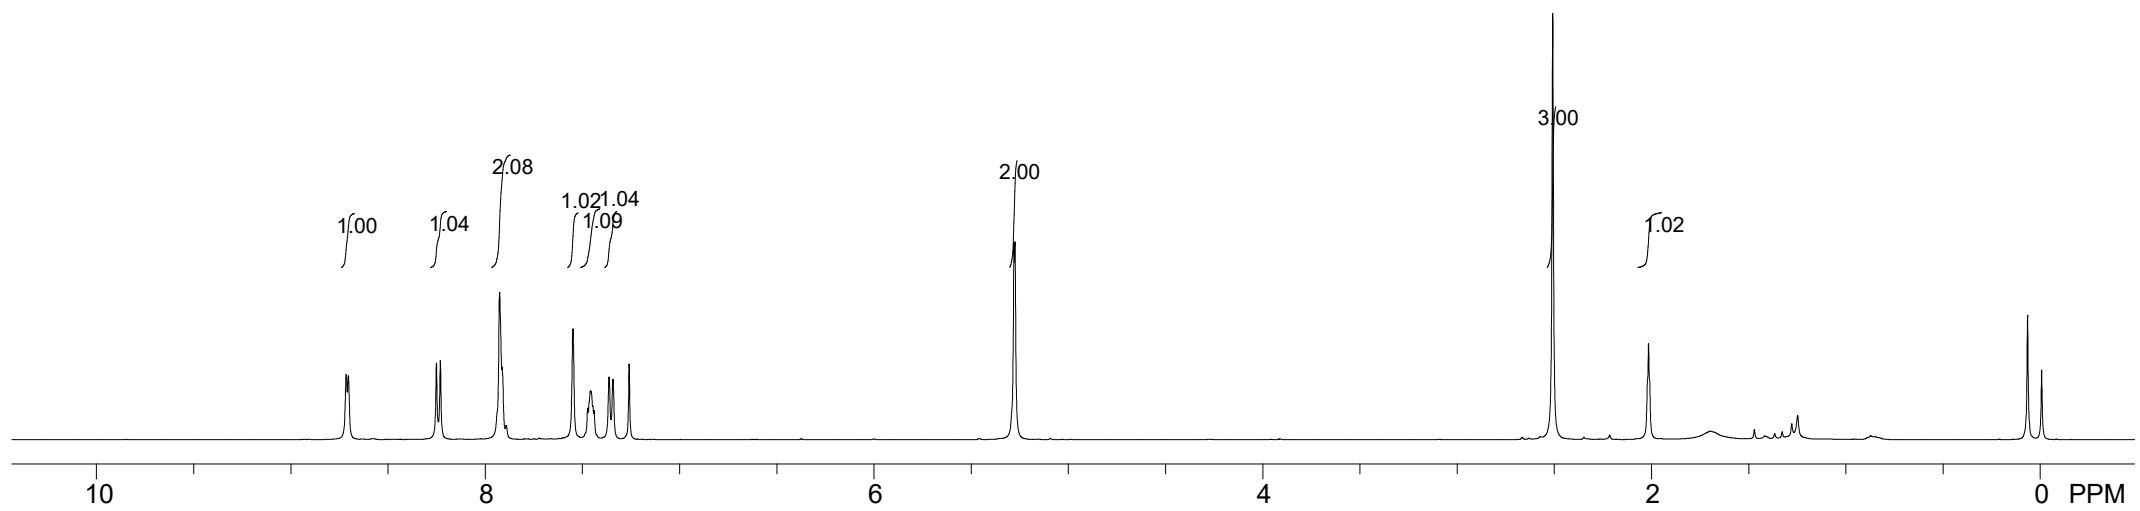

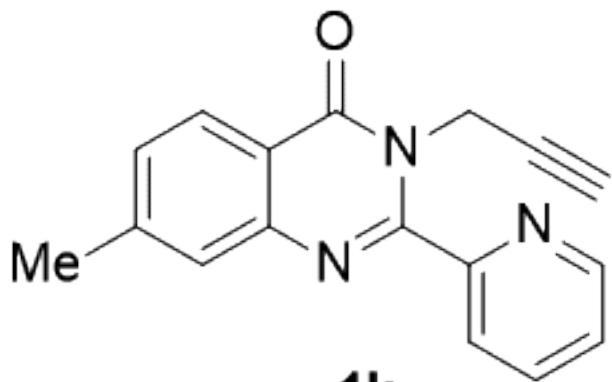

**1k**

100 MHz, CDCl<sub>3</sub>

161.465  
153.386  
152.540  
148.610  
147.042  
145.657  
137.381  
129.193  
127.443  
126.961  
125.029  
124.701  
118.540

78.451  
77.321  
77.000  
76.686  
71.509

33.659

21.927

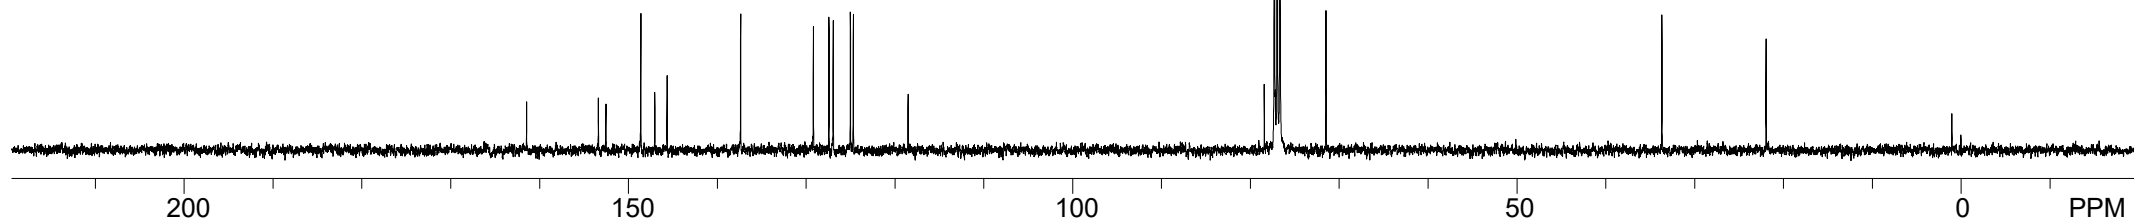

8.723  
8.712  
8.297  
8.275  
7.939  
7.929  
7.753  
7.750  
7.495  
7.484  
7.474

5.301  
5.296

2.030

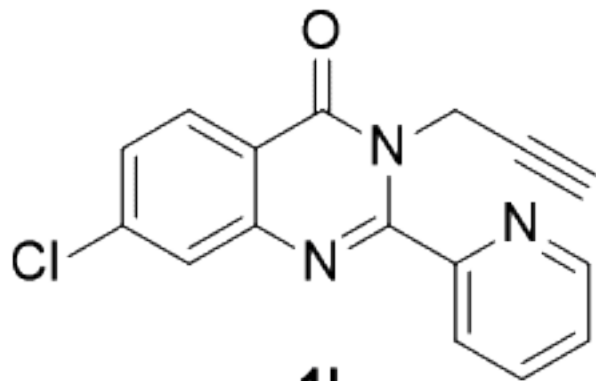

**11**

400 MHz, CDCl<sub>3</sub>

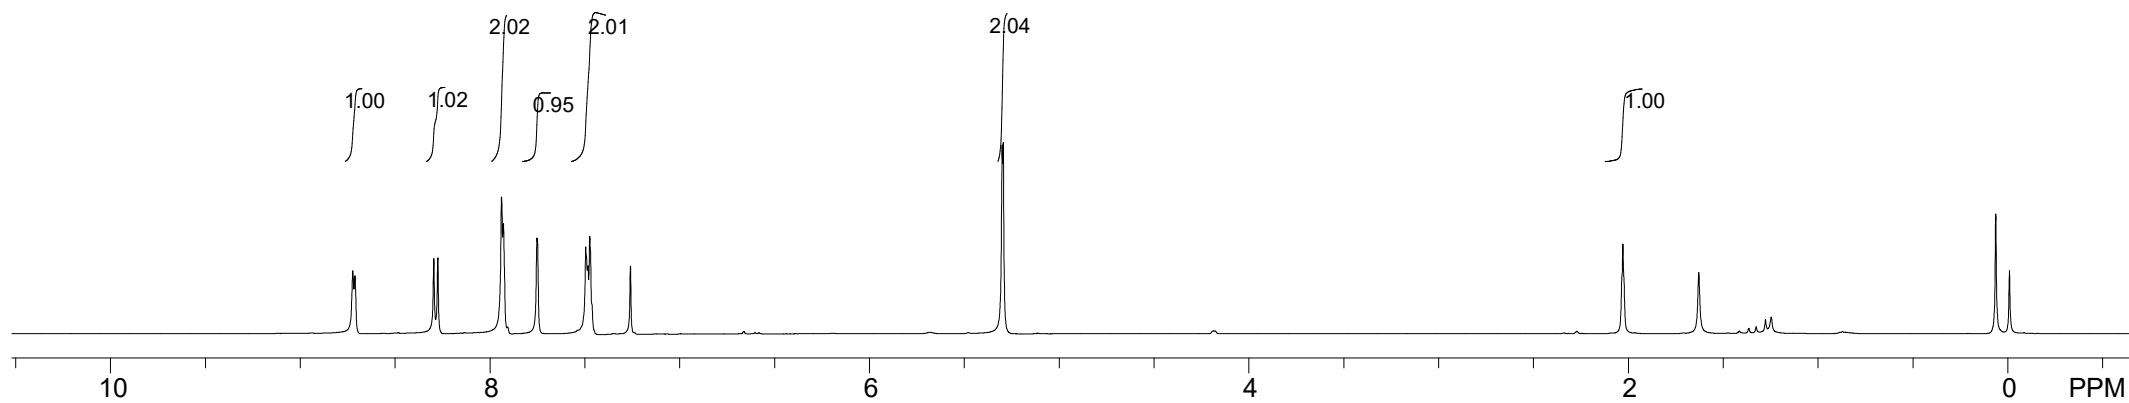

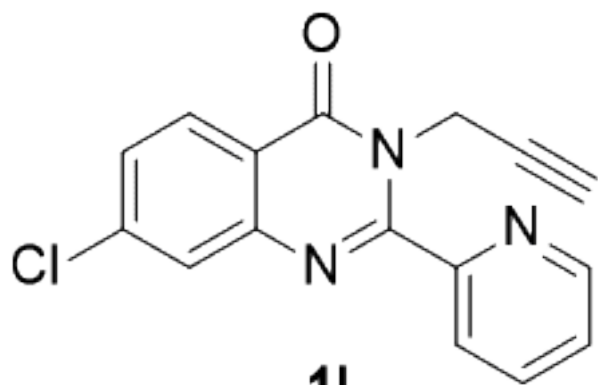

11

100 MHz, CDCl<sub>3</sub>

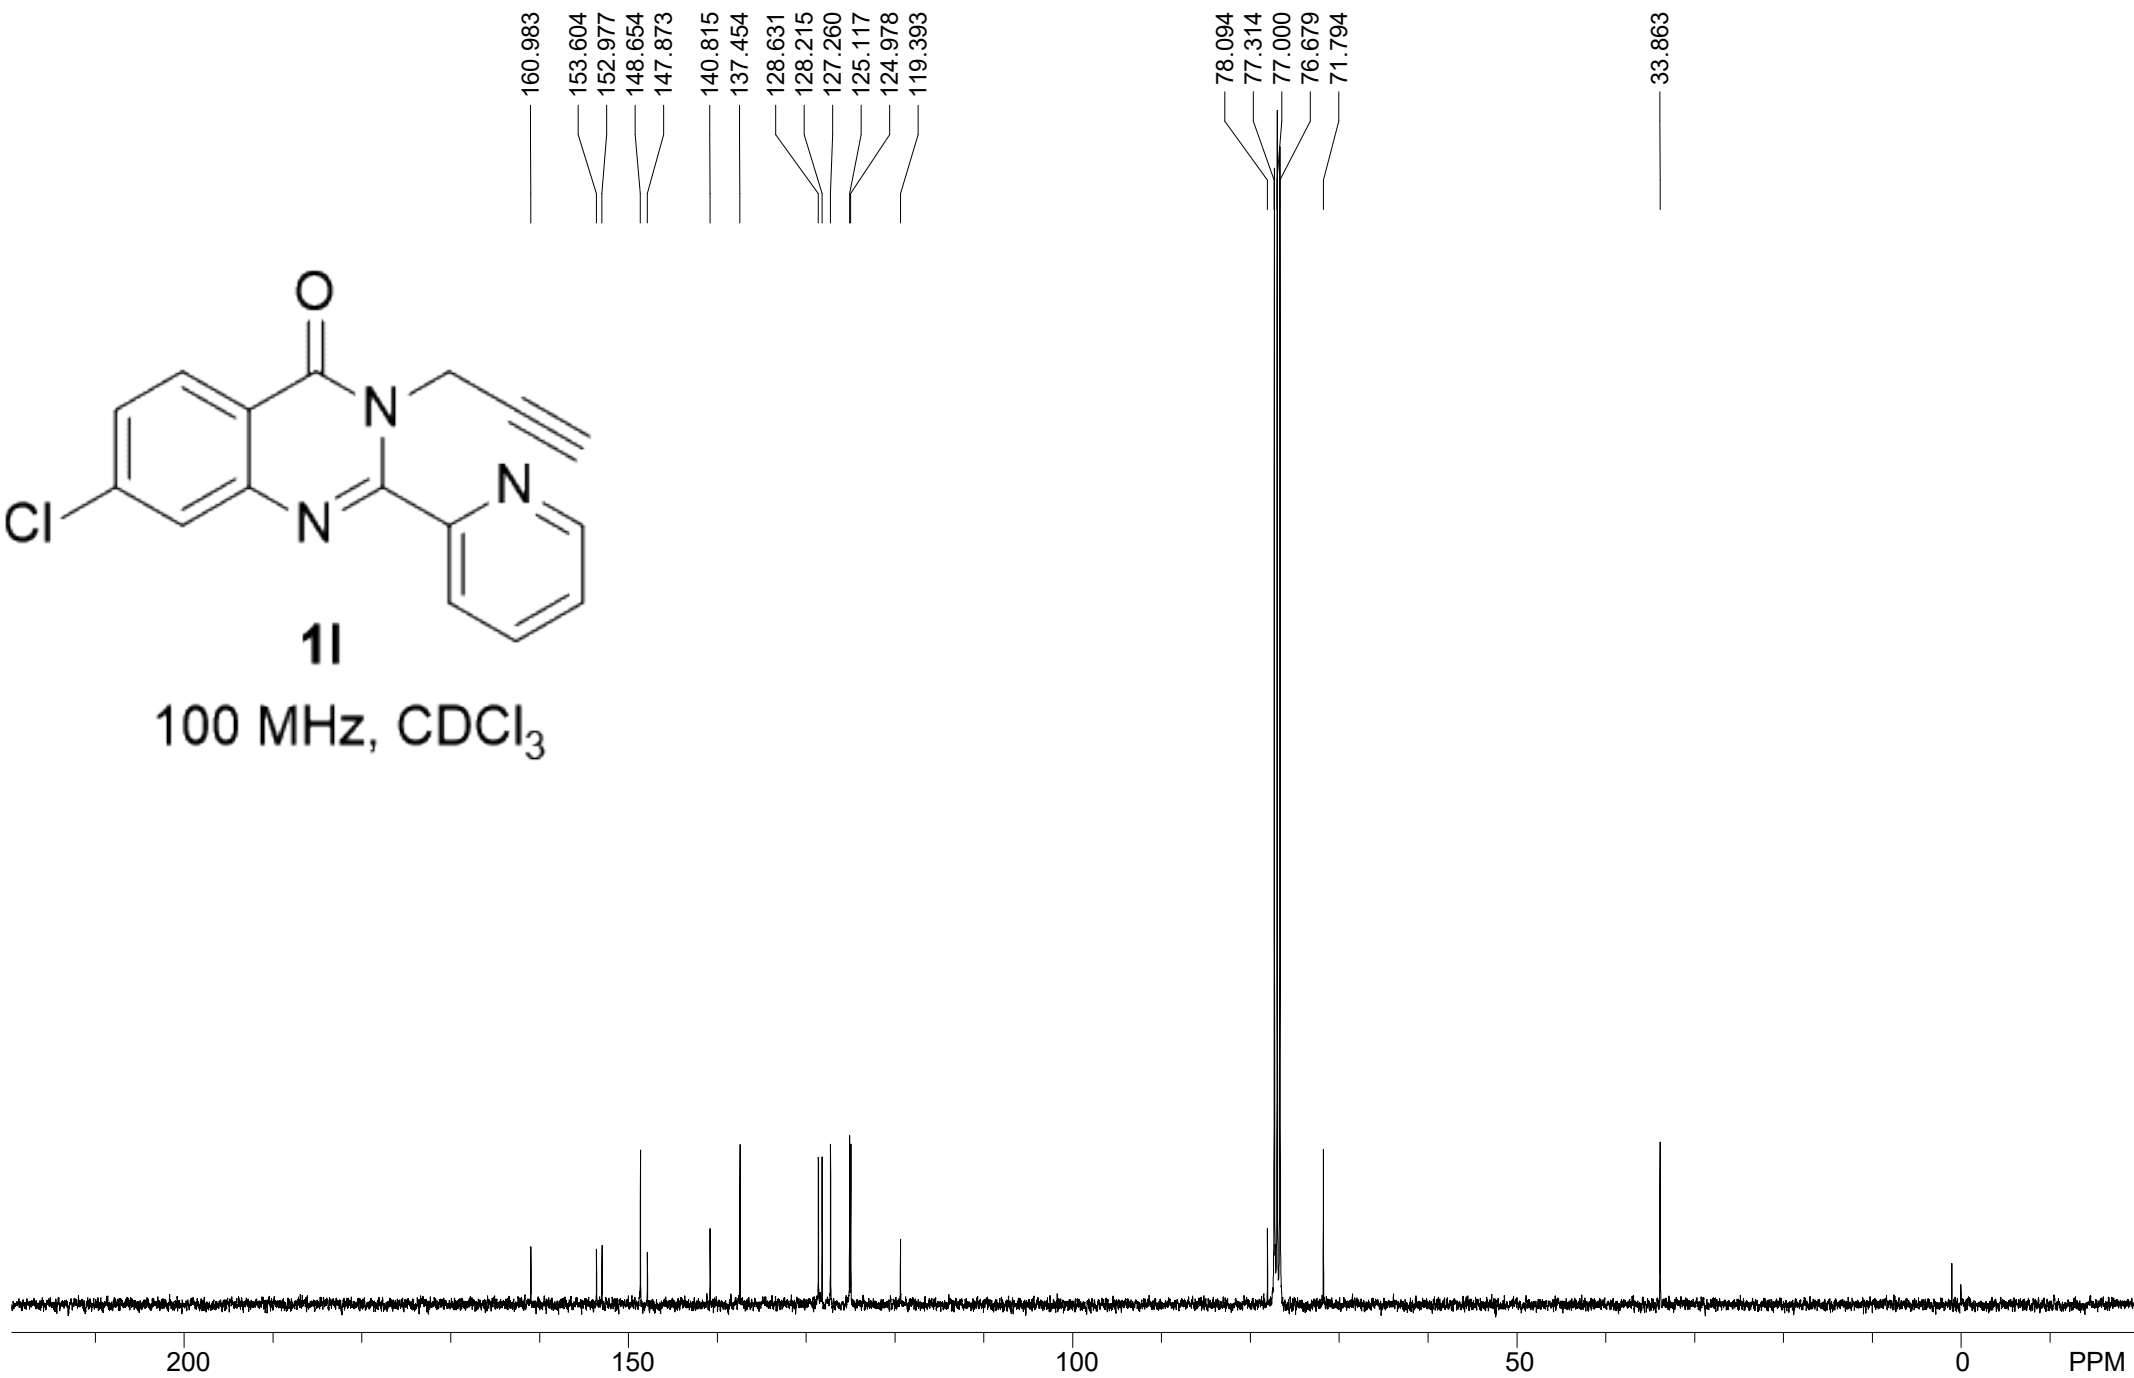

8.734  
8.722  
8.398  
8.383  
8.376  
8.361  
7.948  
7.939  
7.917  
7.504  
7.493  
7.483  
7.471  
7.421  
7.416  
7.397  
7.392  
7.281  
7.275  
7.268  
7.260  
7.255  
7.239  
7.234  
5.300  
5.294

2.041

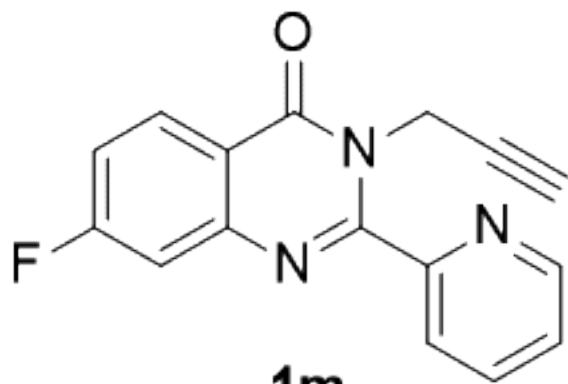

**1m**

400 MHz, CDCl<sub>3</sub>

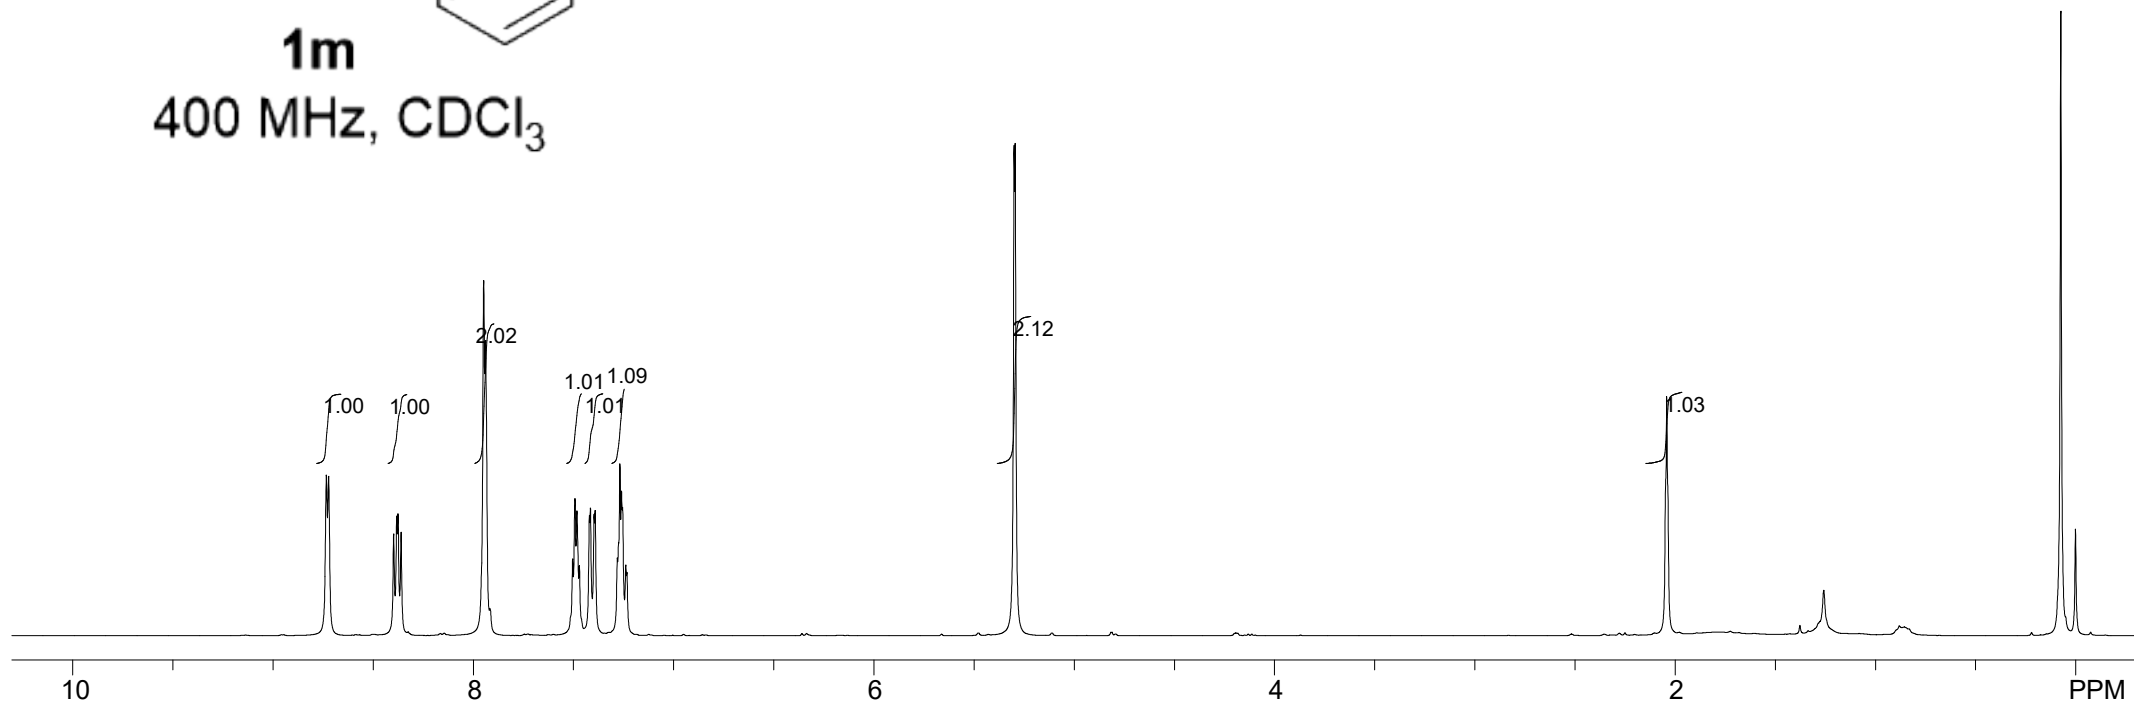

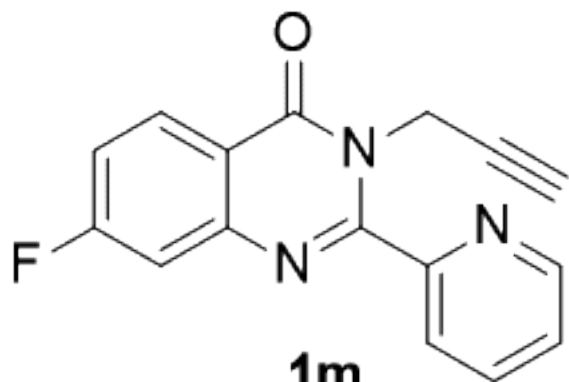

100 MHz, CDCl<sub>3</sub>

167.852  
165.315  
160.823  
153.663  
152.978  
149.106  
148.974  
148.683  
137.454  
129.973  
129.871  
125.073  
124.964  
117.657  
116.513  
116.272  
113.137  
112.918

78.138  
77.314  
77.000  
76.679  
71.765

33.798

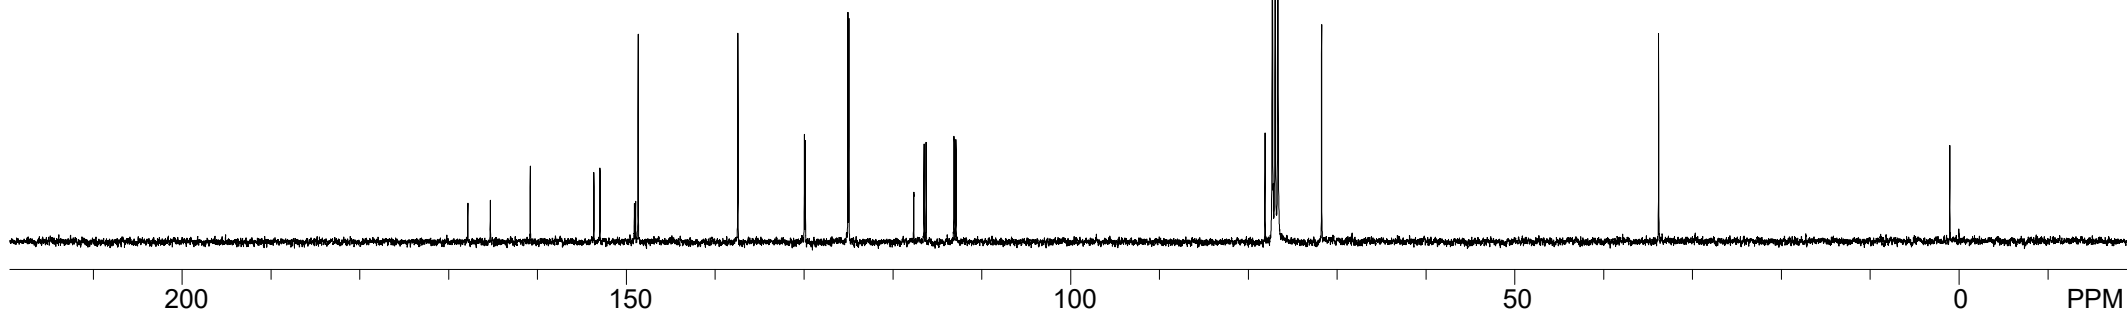



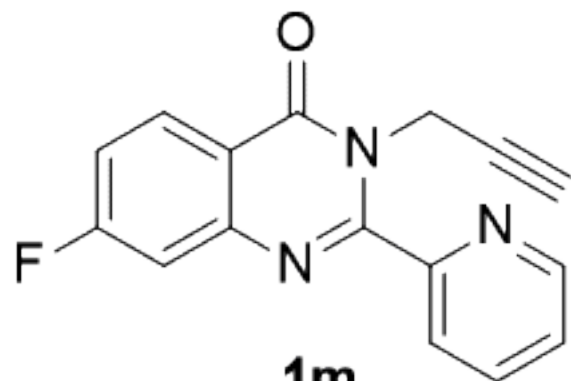

**1m**

376 MHz, CDCl<sub>3</sub>

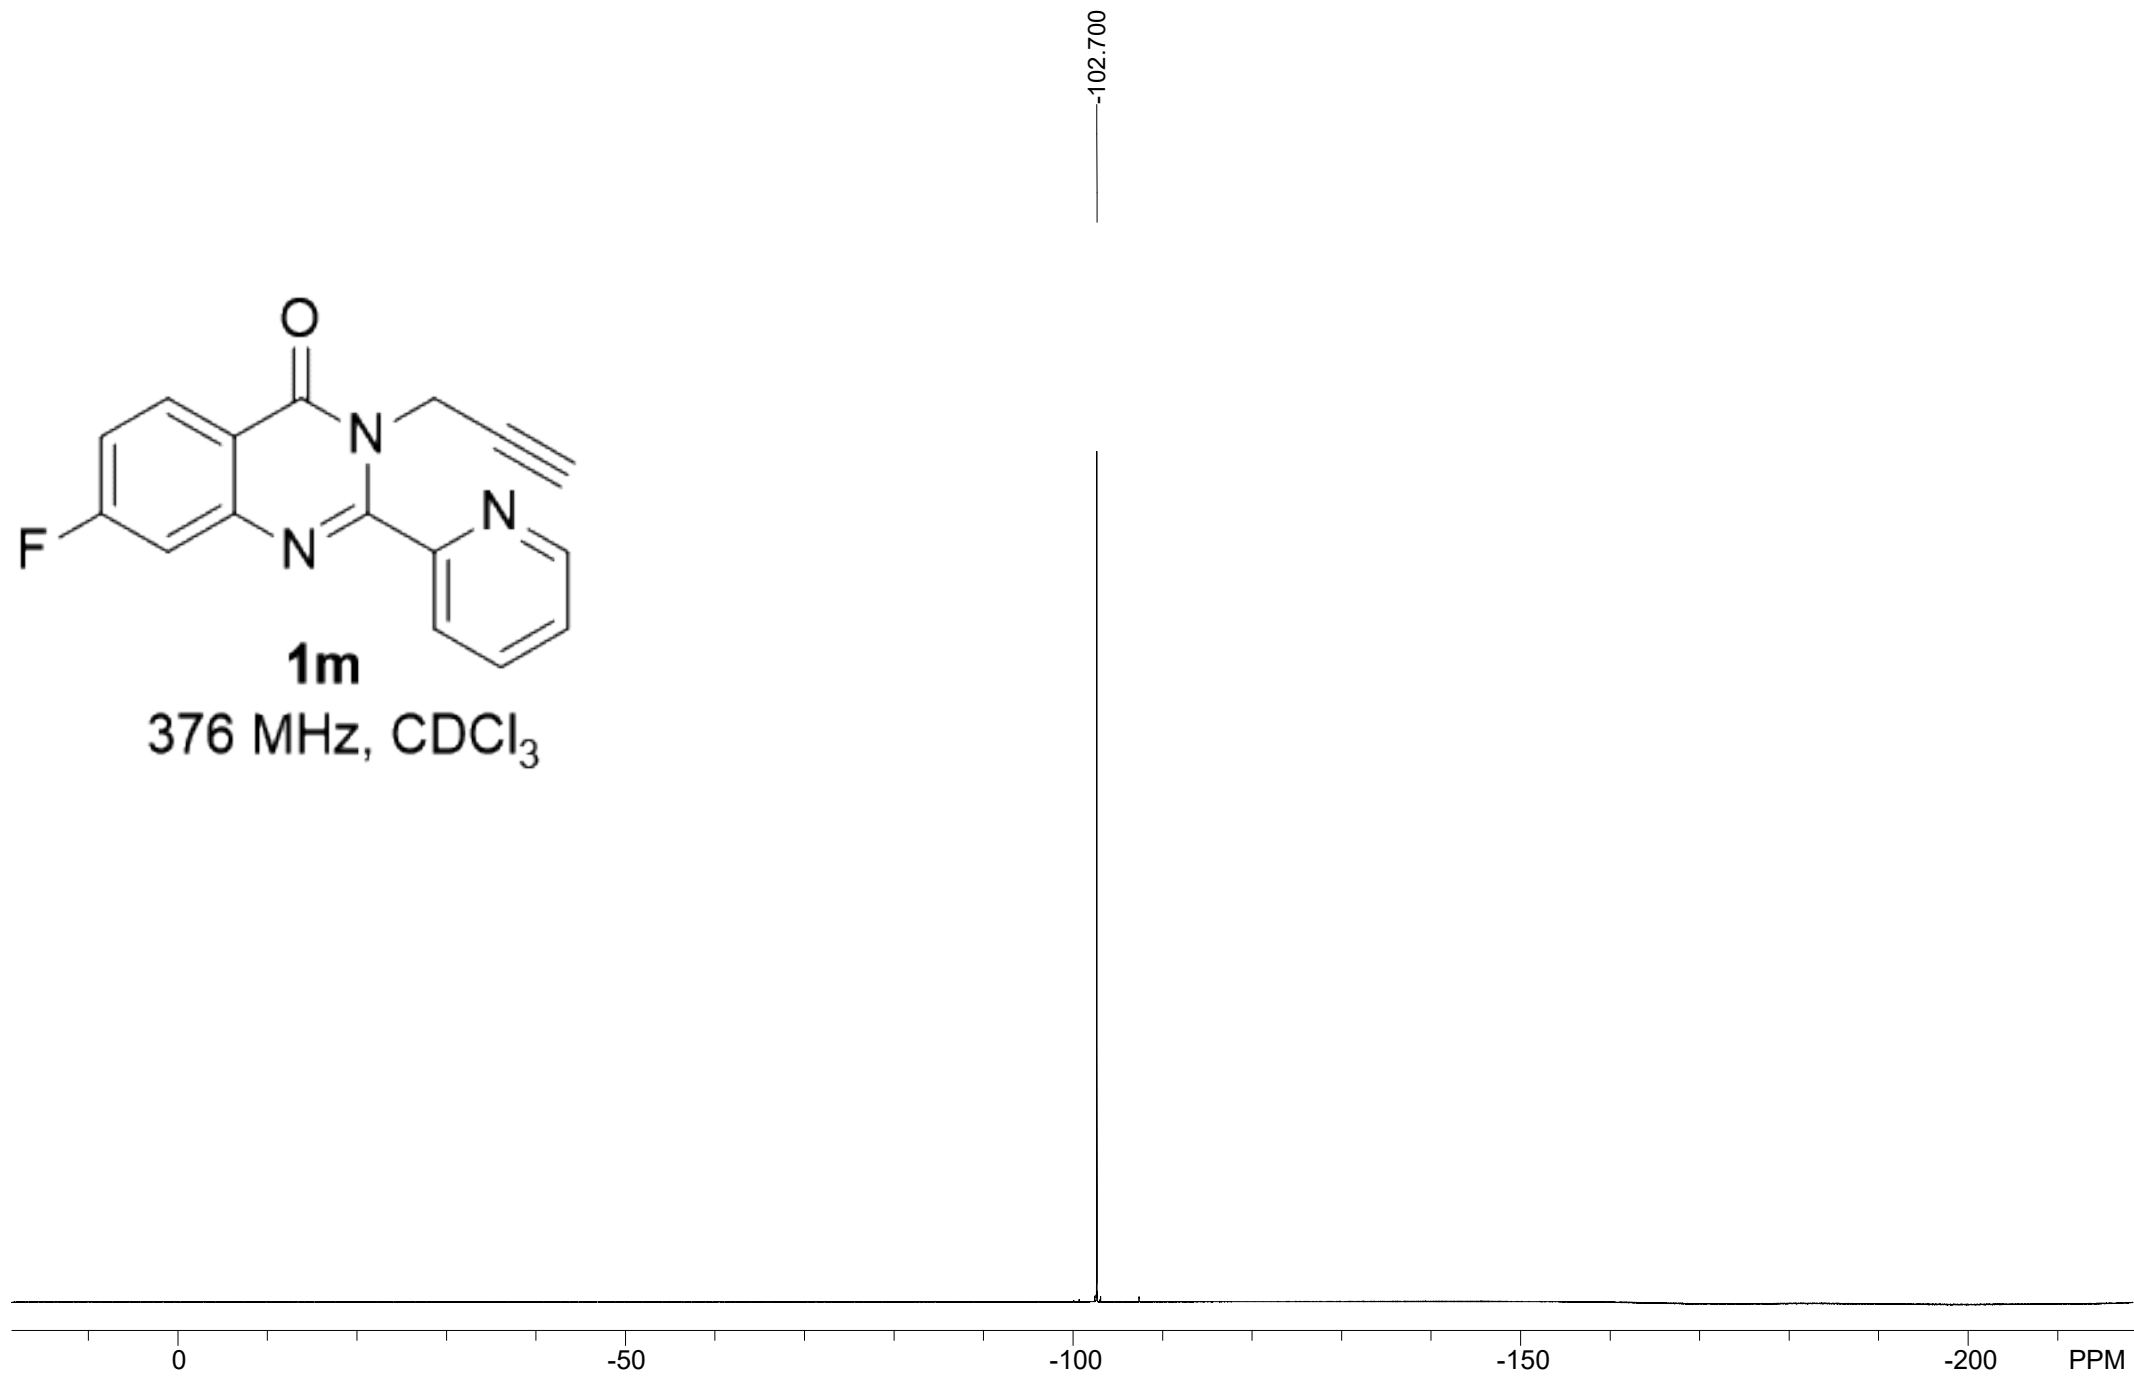

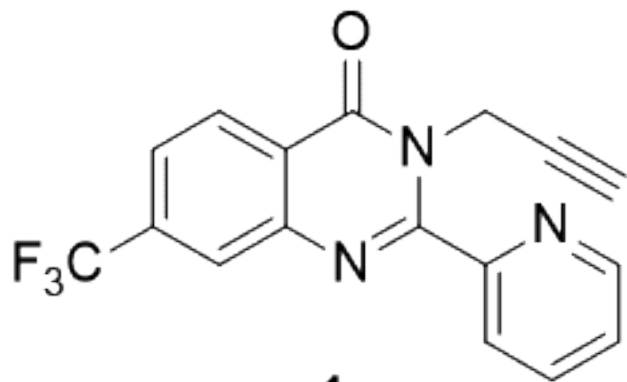

**1n**

400 MHz, CDCl<sub>3</sub>

8.734  
8.722  
8.486  
8.466  
8.050  
7.979  
7.962  
7.945  
7.926  
7.745  
7.724  
7.511  
7.507  
7.495  
7.482  
7.479

5.350  
5.344  
5.293

2.046  
2.040  
2.035

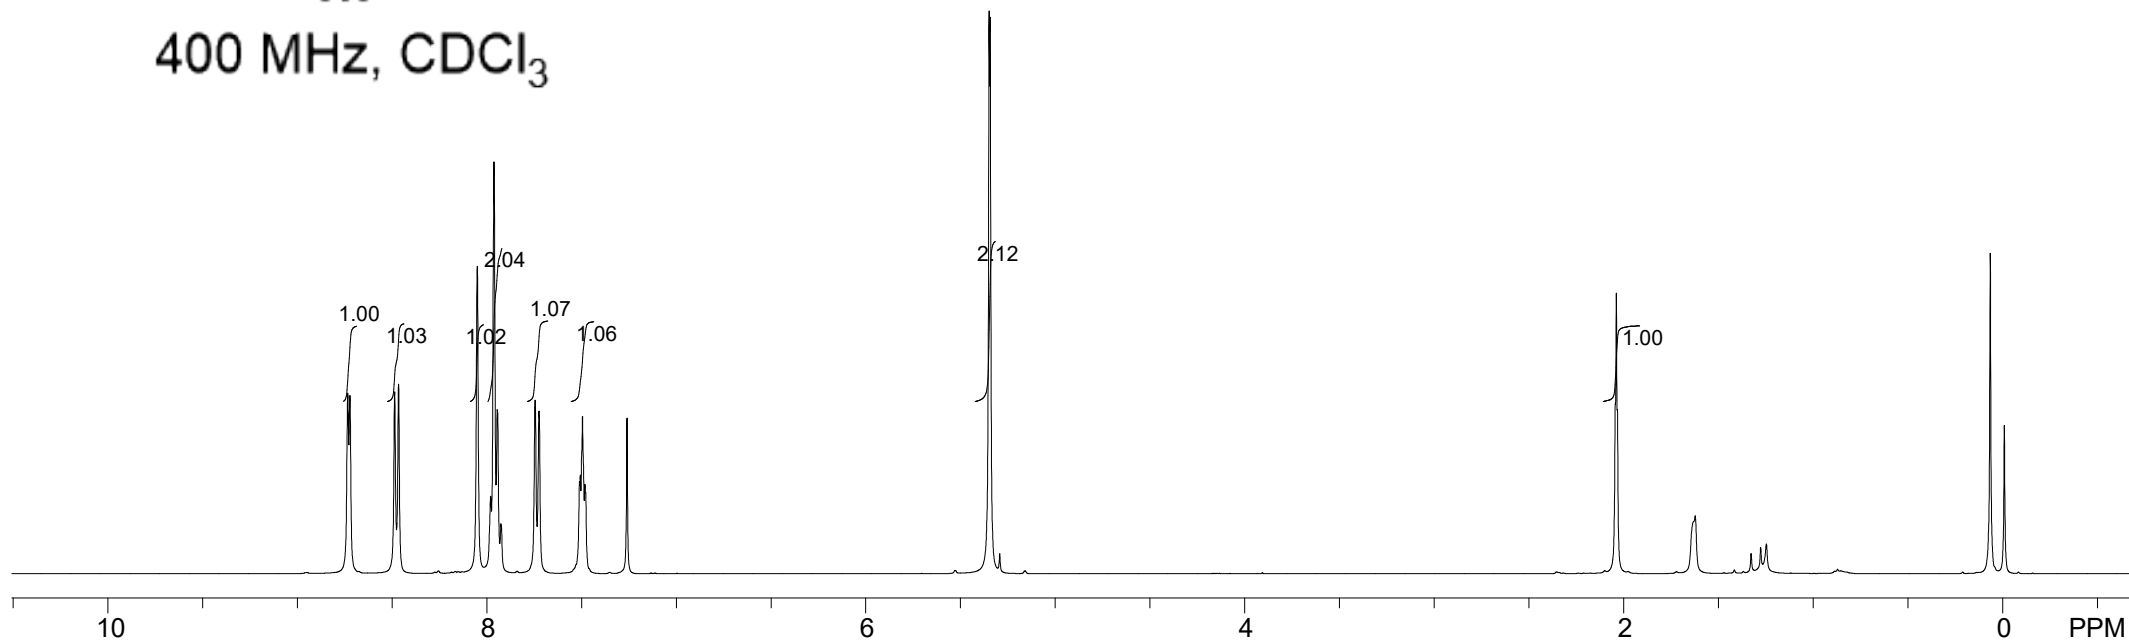

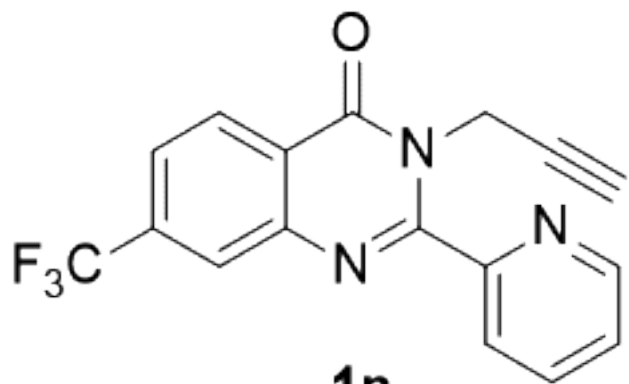

**1n**

100 MHz, CDCl<sub>3</sub>

160.845  
153.692  
152.839  
148.668  
146.918  
137.498  
136.659  
136.338  
136.010  
135.675  
128.347  
125.357  
125.321  
125.277  
125.241  
125.160  
125.095  
124.679  
123.571  
123.542  
123.214  
121.959  
77.911  
77.314  
77.000  
76.679  
71.954  
34.038

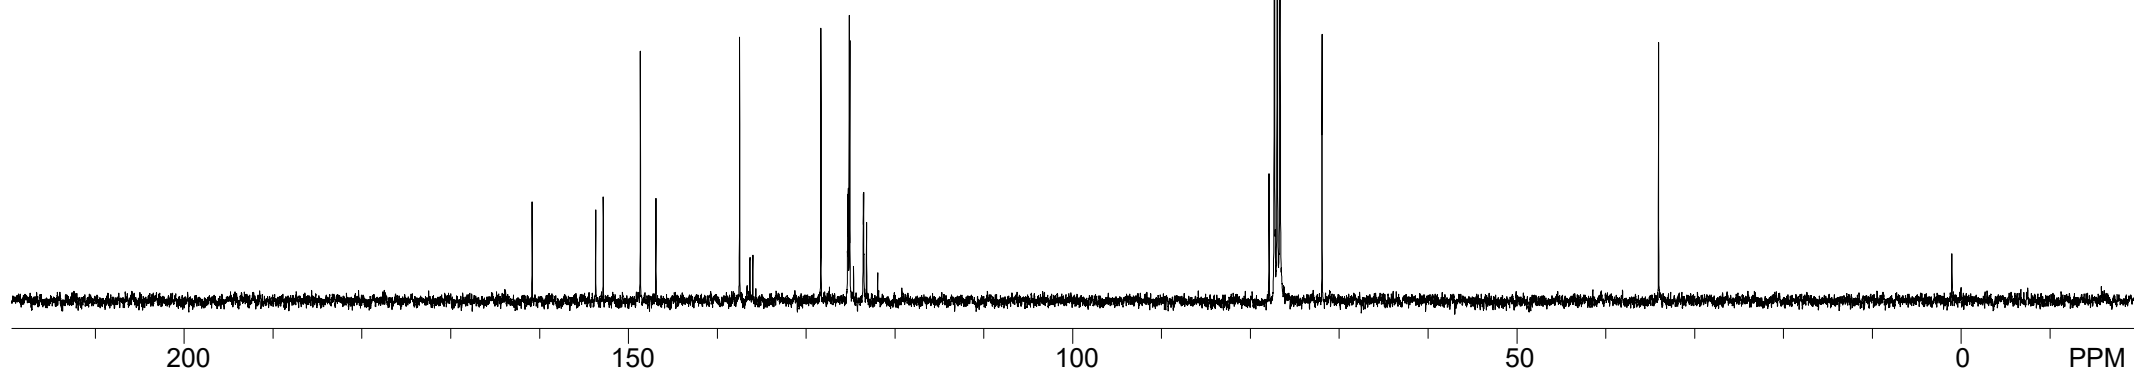

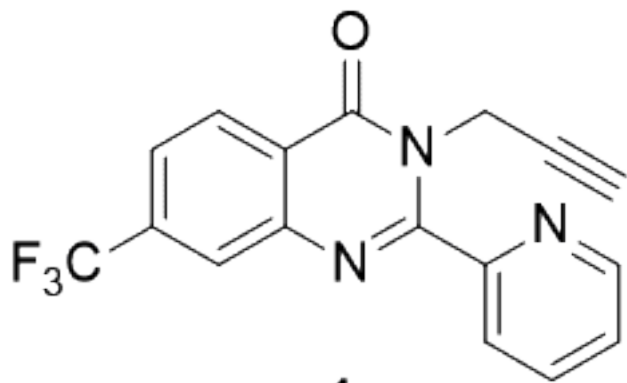

**1n**  
376 MHz, CDCl<sub>3</sub>

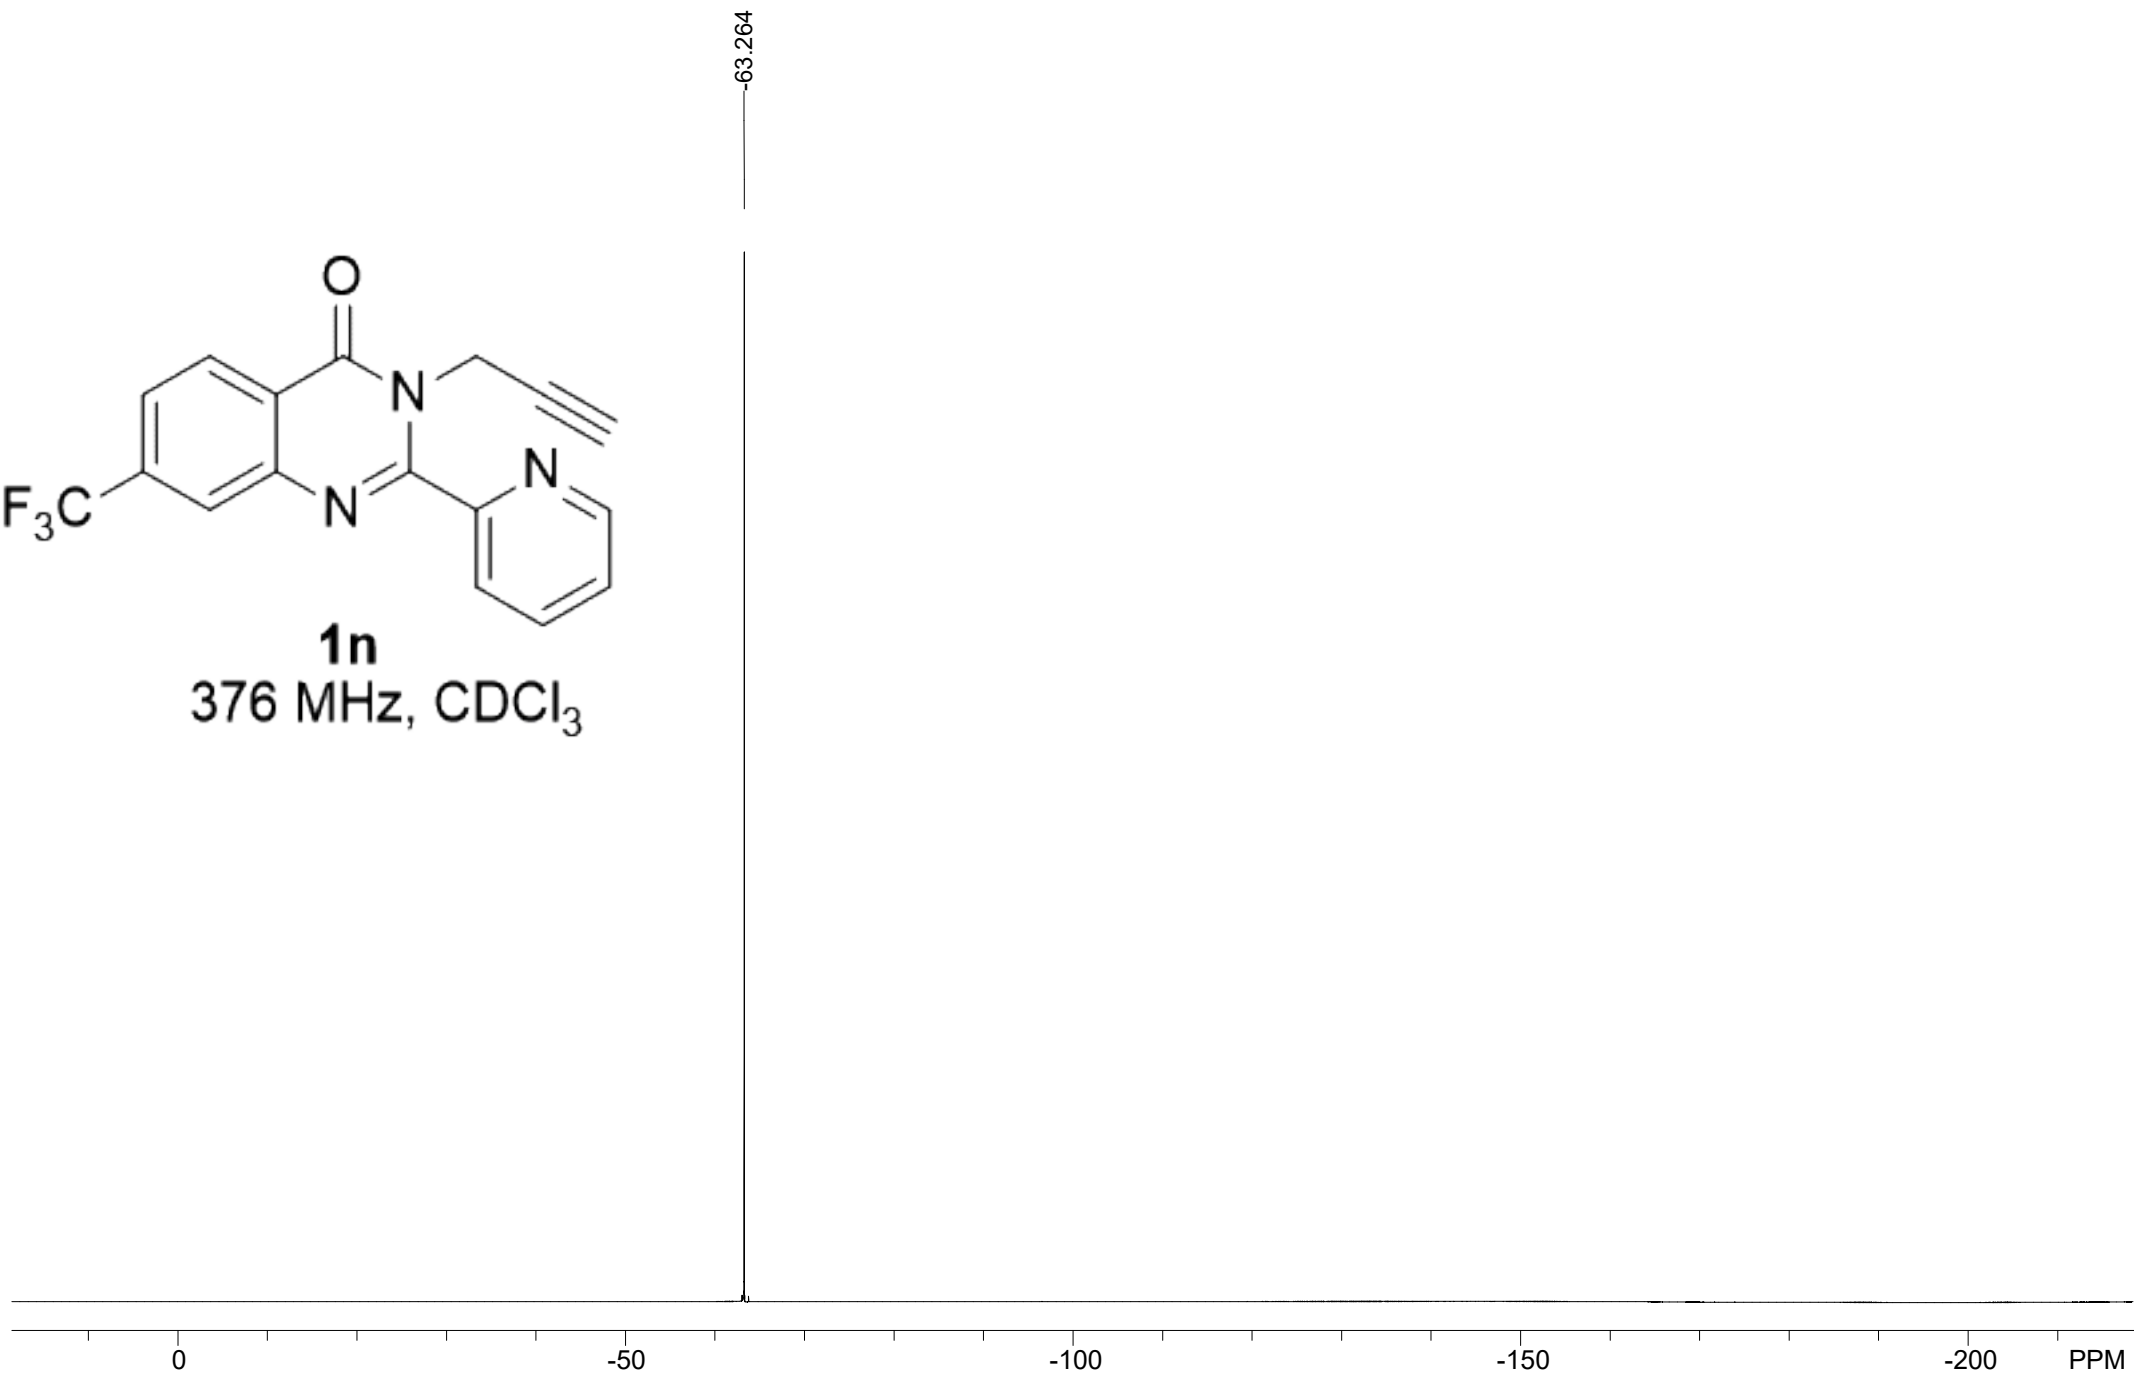

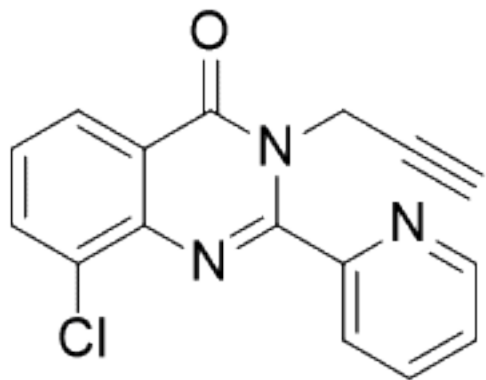

**1o**

400 MHz, CDCl<sub>3</sub>

8.711  
8.700  
8.292  
8.272  
8.106  
8.087  
7.960  
7.942  
7.923  
7.870  
7.851  
7.490  
7.471  
7.459  
7.451  
7.431

5.430  
5.425

2.011

1.05  
1.07  
1.06  
1.09  
1.07  
2.09  
2.00  
1.08

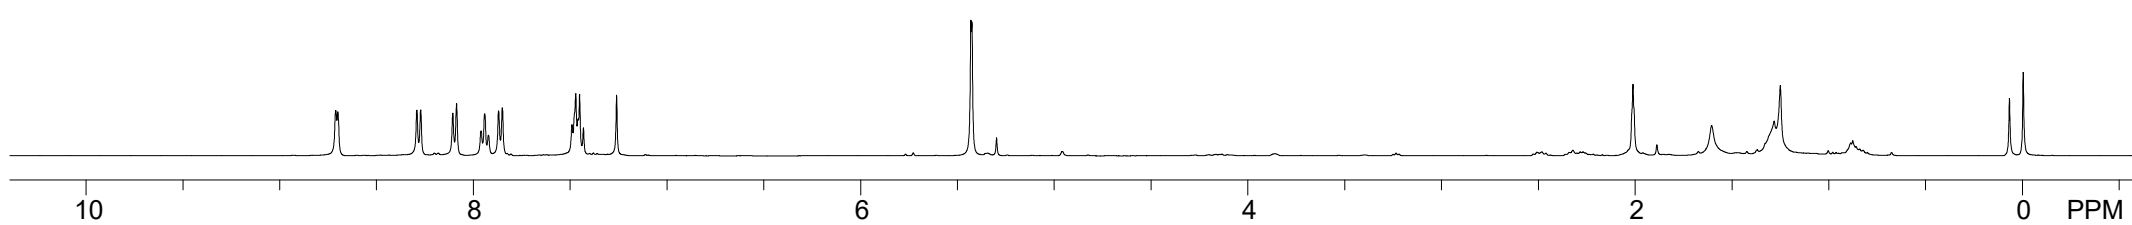

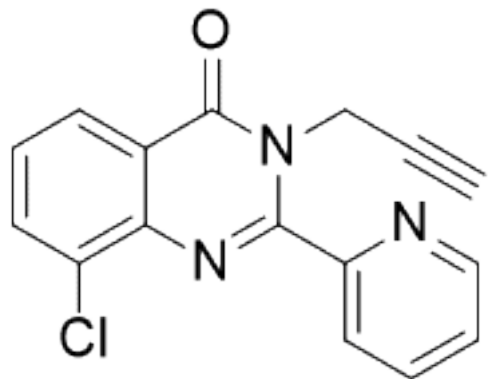

**1o**

100 MHz, CDCl<sub>3</sub>

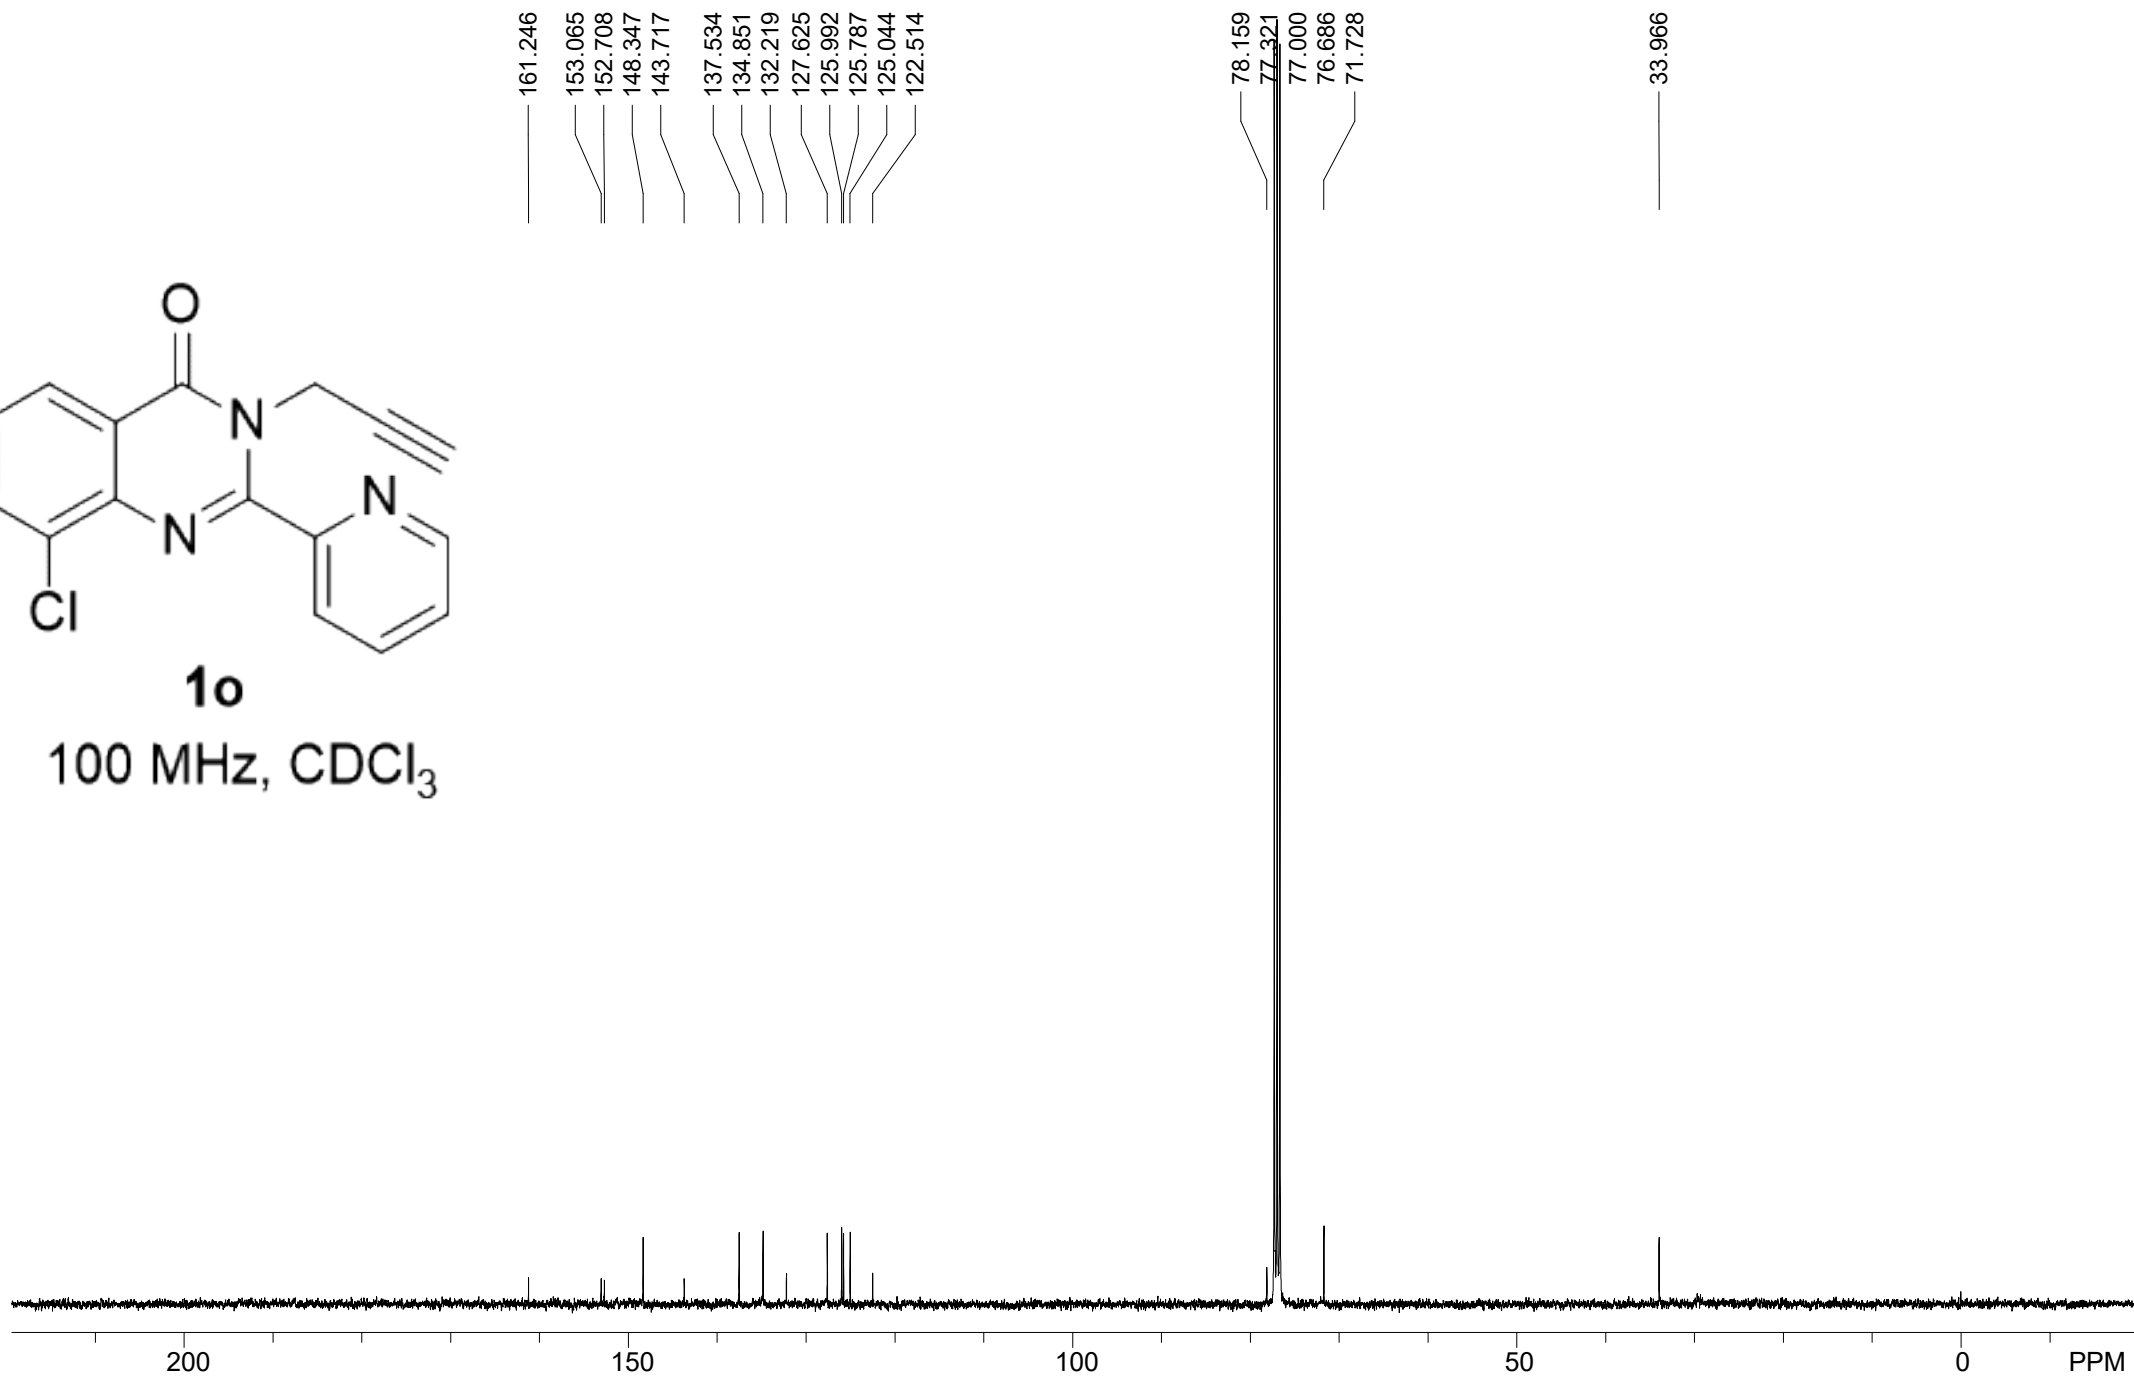

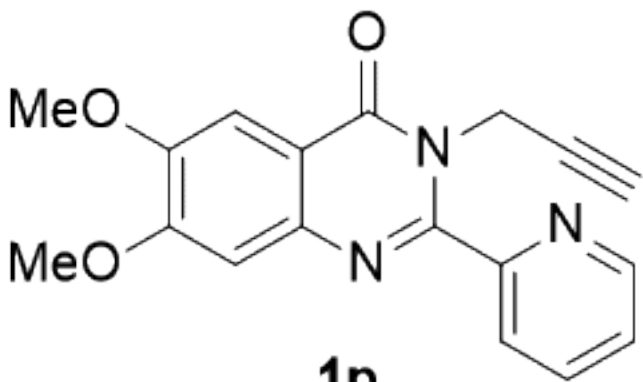

**1p**

400 MHz, CDCl<sub>3</sub>

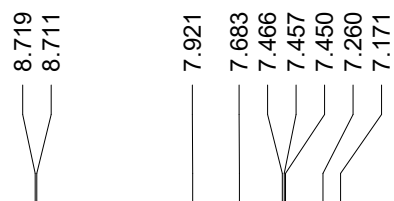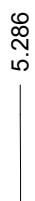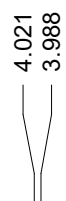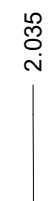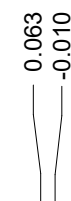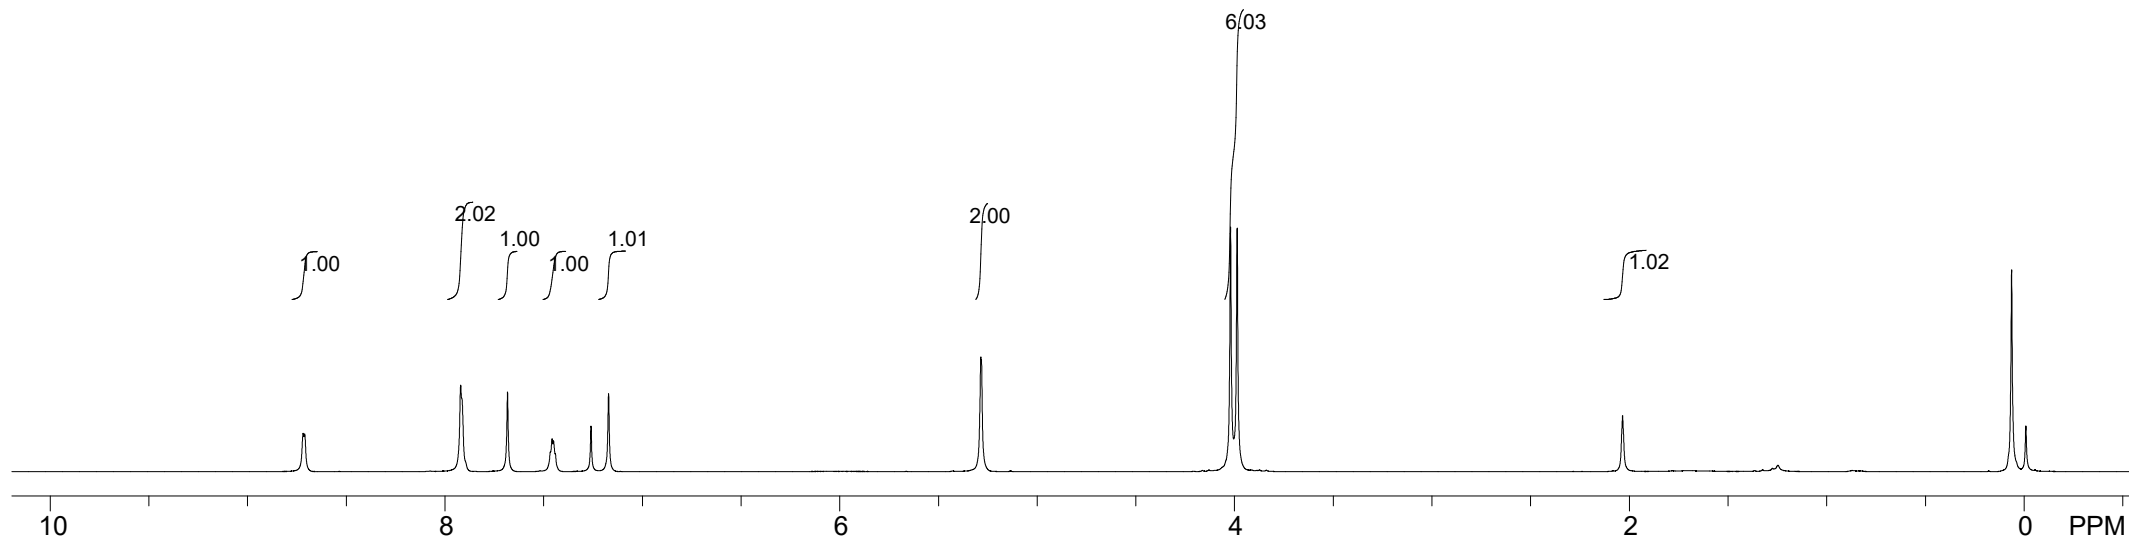

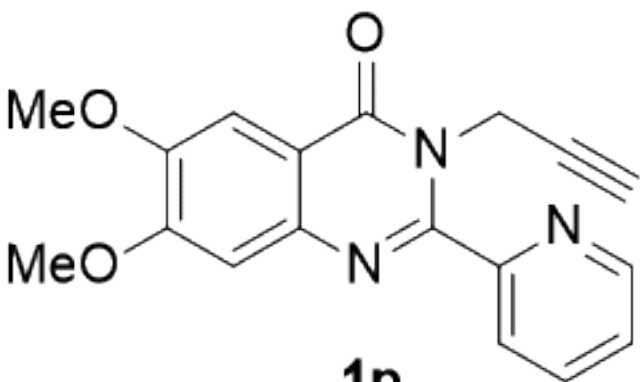

**1p**

100 MHz, CDCl<sub>3</sub>

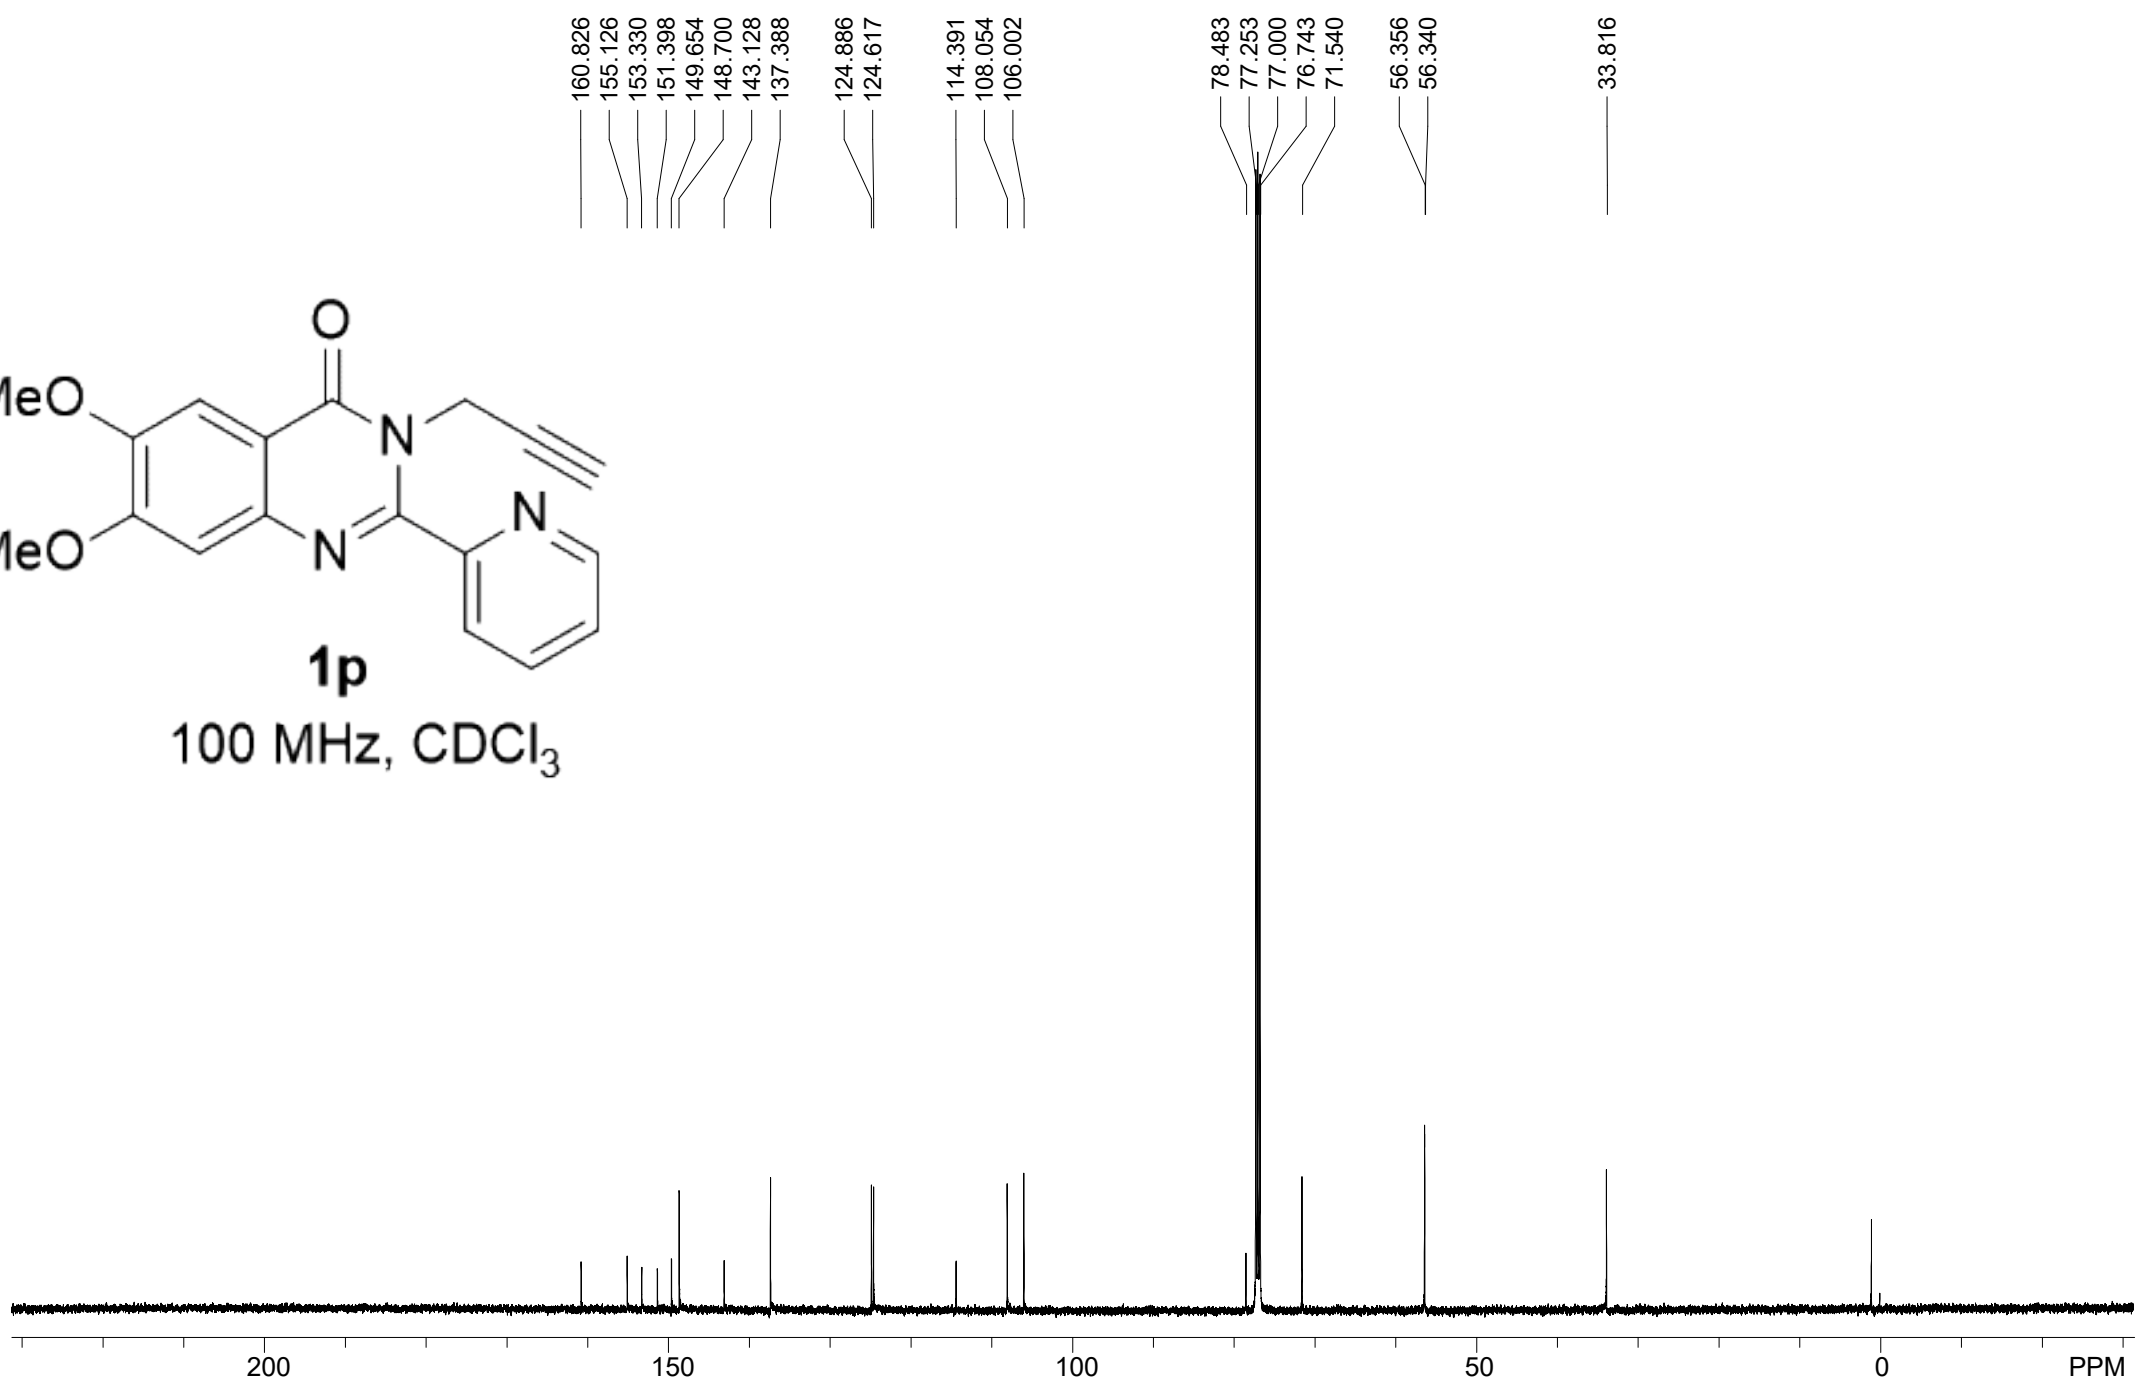



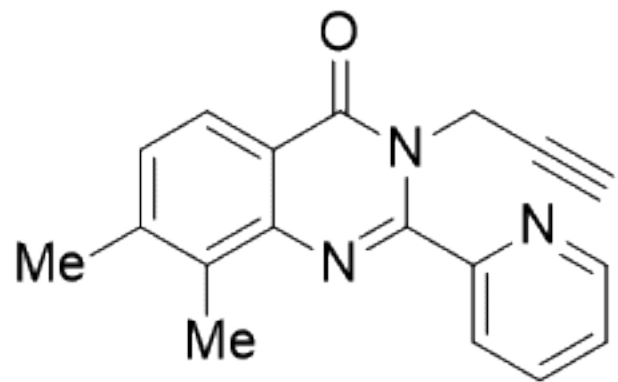

**1q**

400 MHz, CDCl<sub>3</sub>

8.704  
8.693  
8.127  
8.107  
8.028  
8.008  
7.932  
7.915  
7.896  
7.465  
7.452  
7.448  
7.434  
7.347  
7.327

5.390  
5.386

2.566  
2.445

1.984

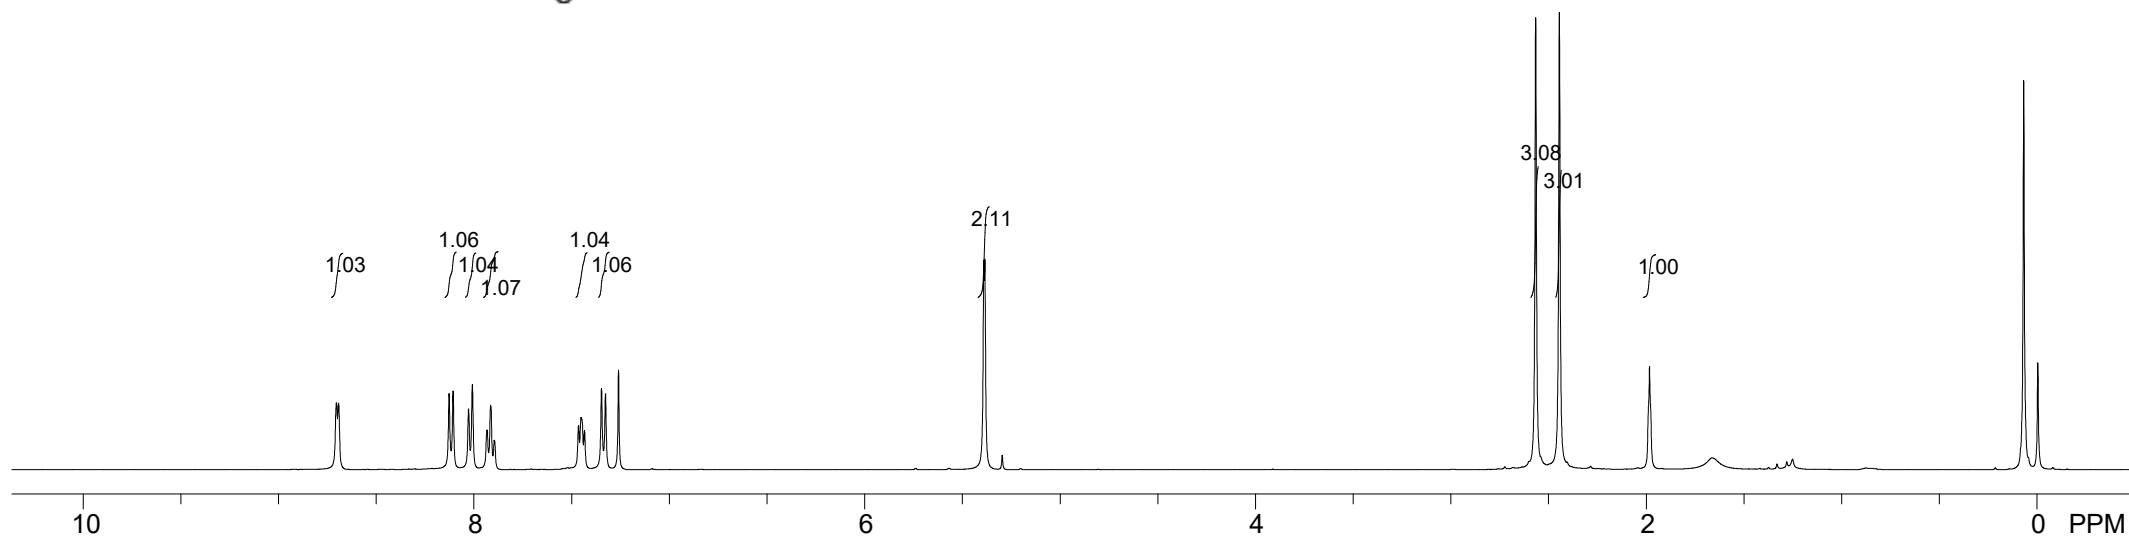

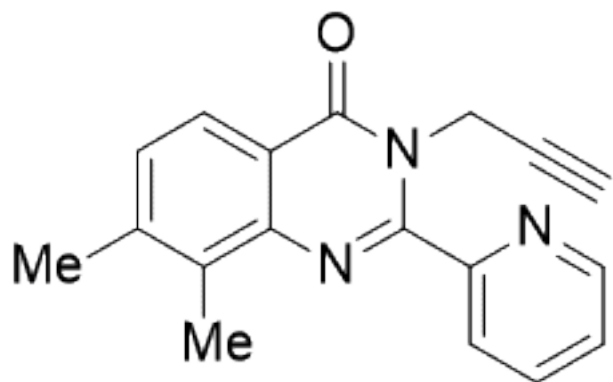

**1q**

100 MHz, CDCl<sub>3</sub>

162.150  
153.882  
150.659  
148.231  
145.212  
143.579  
137.199  
134.275  
129.535  
125.408  
124.533  
123.957  
118.868

78.750  
77.321  
77.000  
76.687  
71.254

33.528  
20.928  
13.024

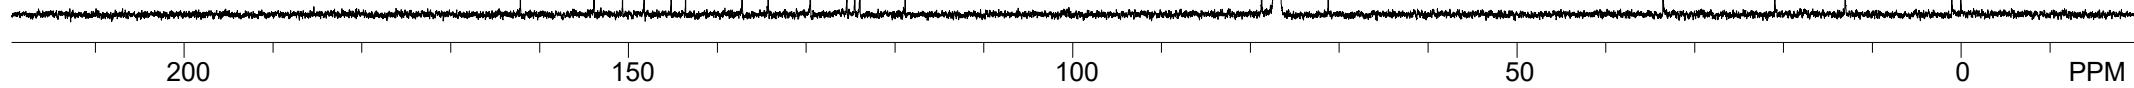

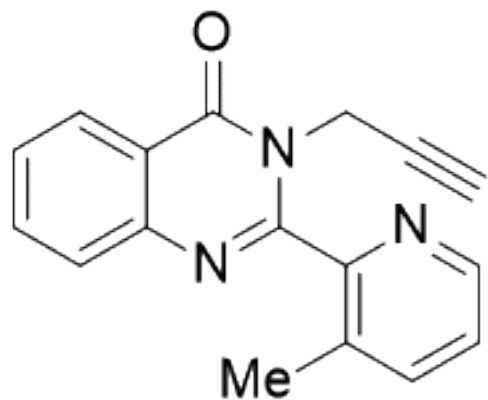

**1r**

400 MHz, CDCl<sub>3</sub>

8.551  
8.541  
8.389  
8.370  
7.808  
7.789  
7.771  
7.740  
7.731  
7.721  
7.711  
7.566  
7.548  
7.530  
7.389  
7.377  
7.370  
7.358  
7.260

4.908

2.426

2.053

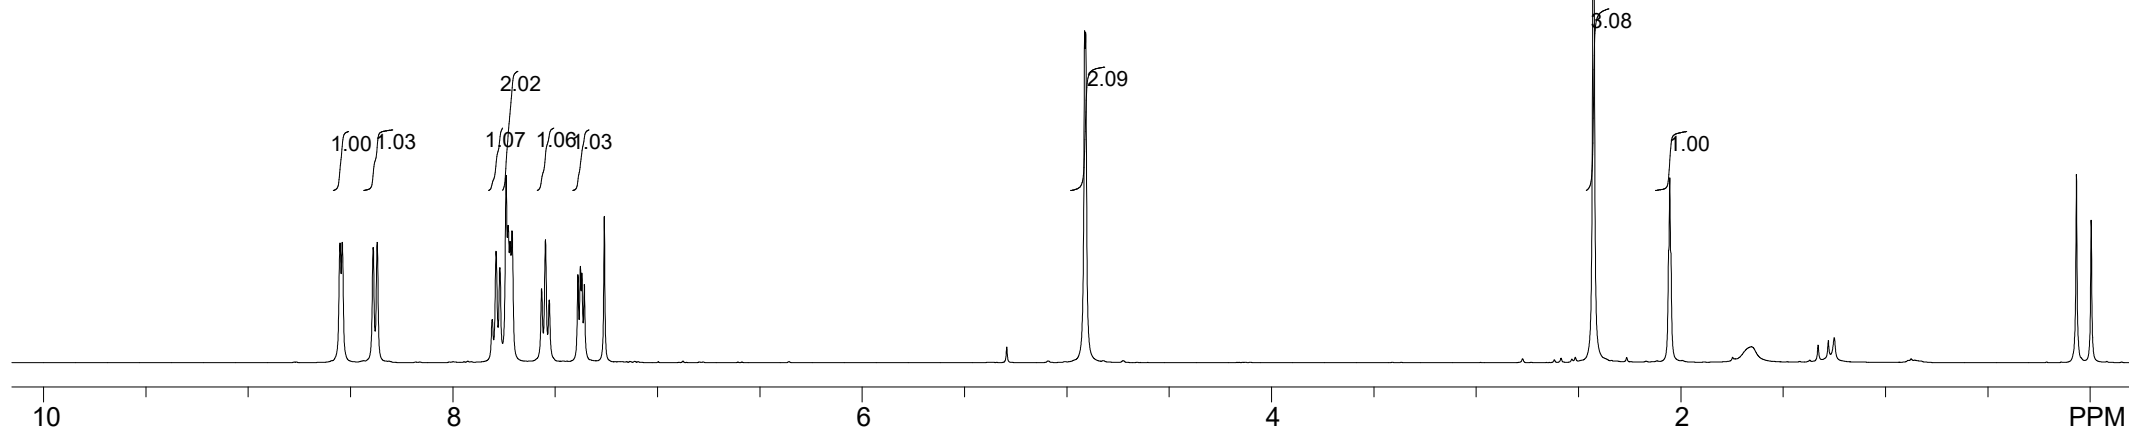

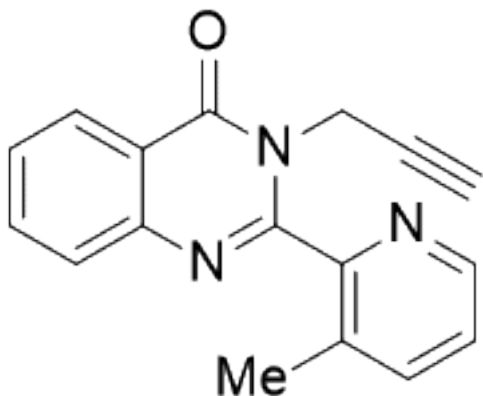

**1r**

100 MHz, CDCl<sub>3</sub>

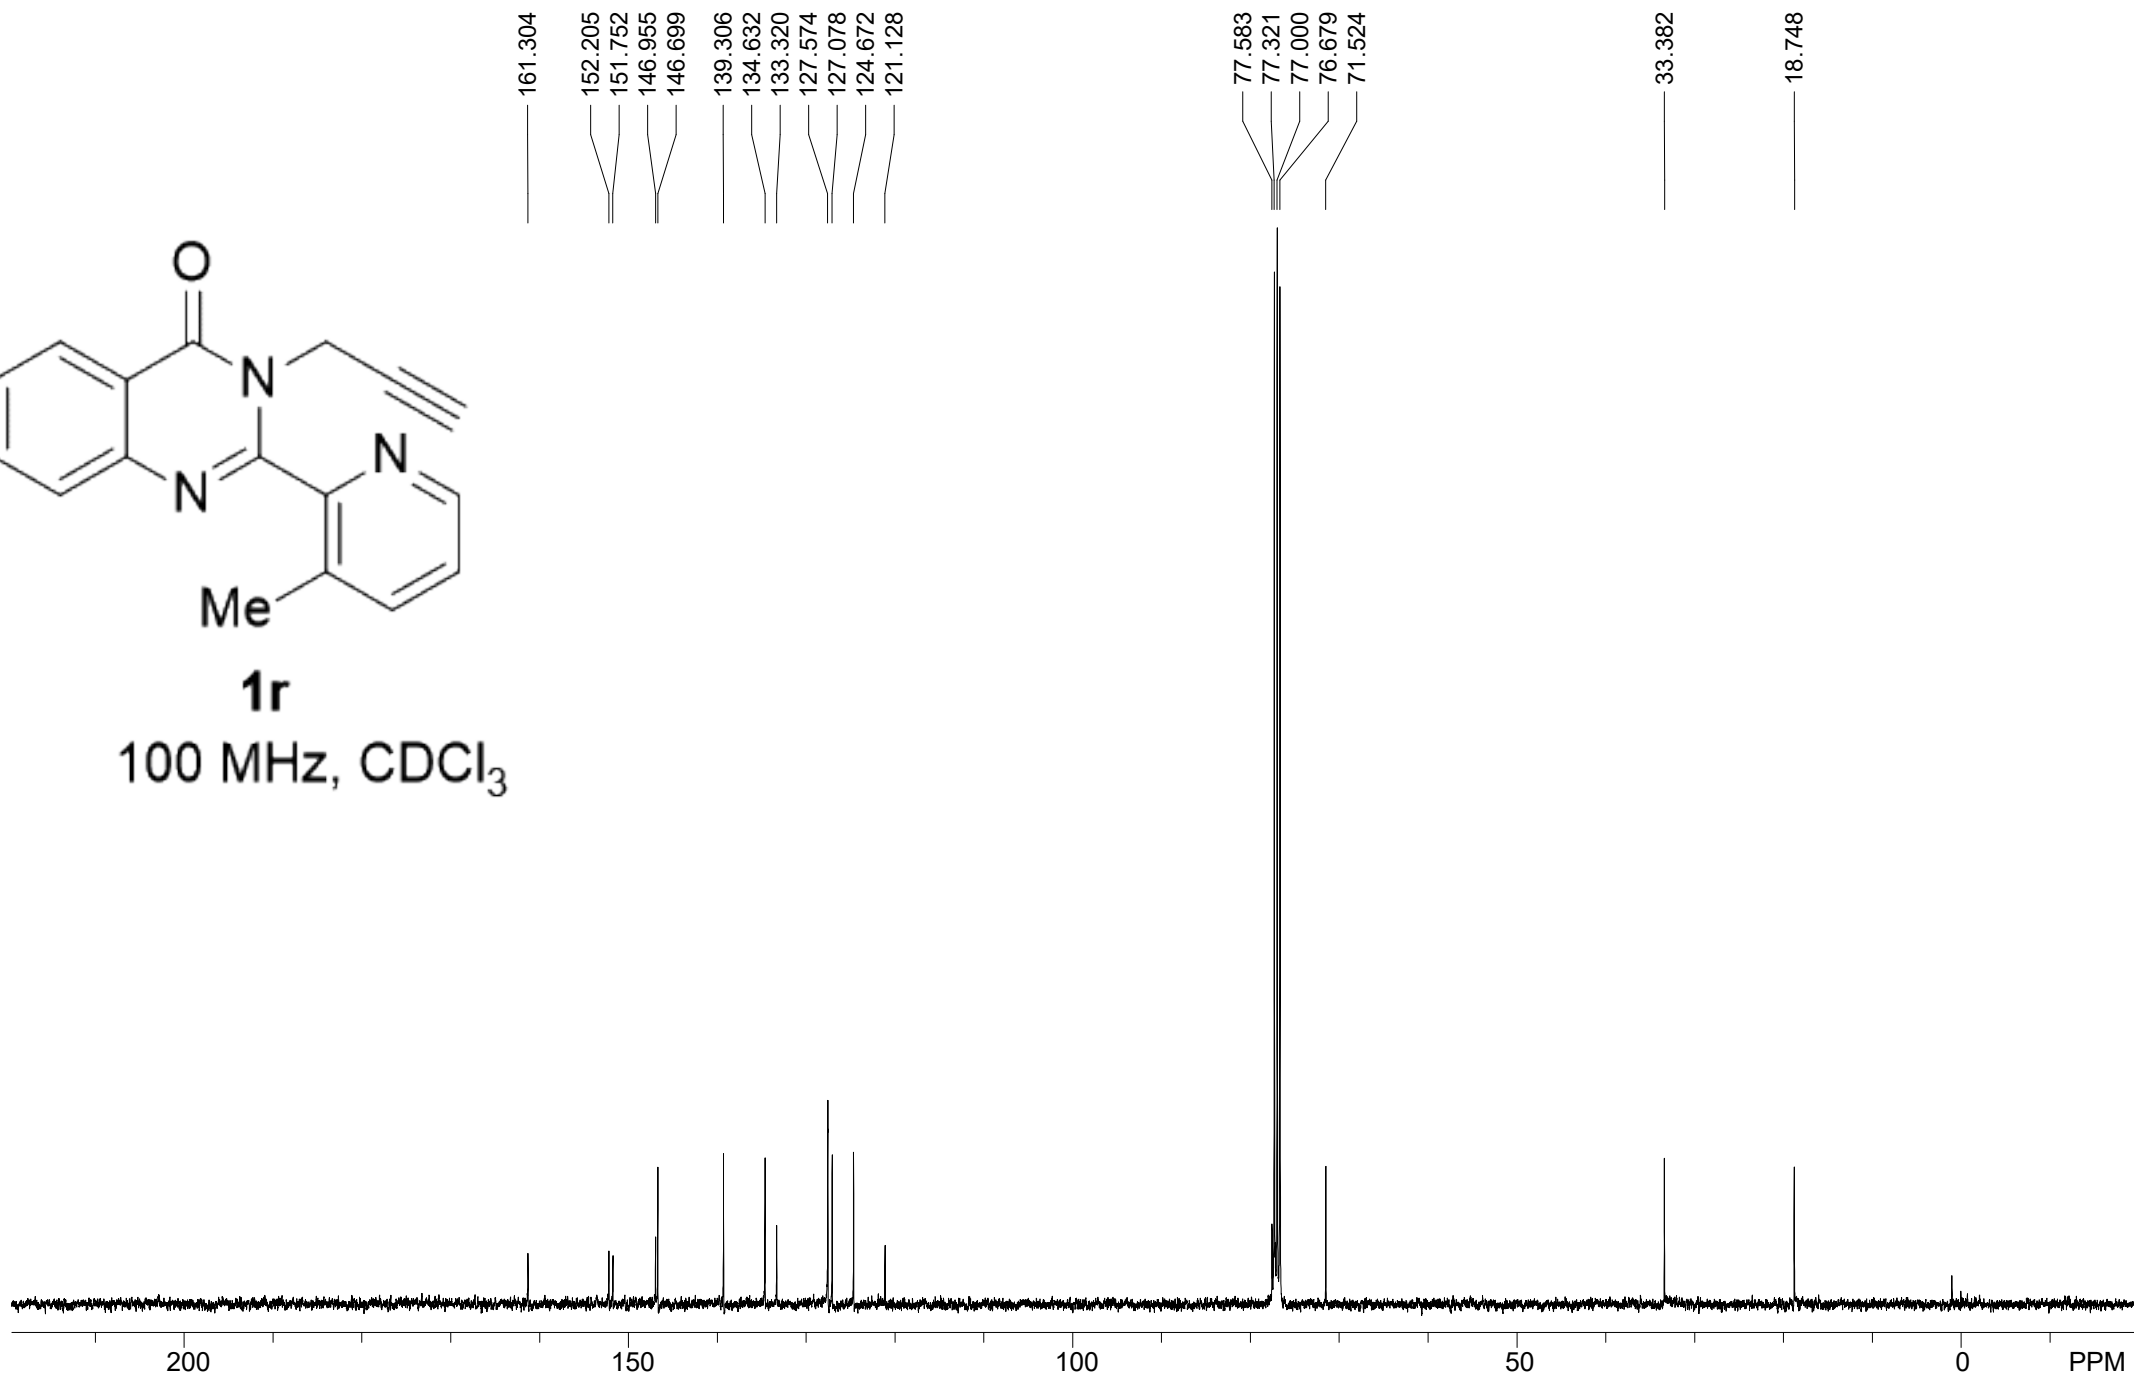

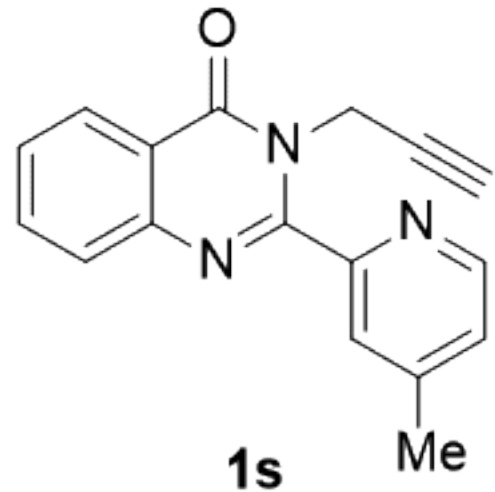

400 MHz, CDCl<sub>3</sub>

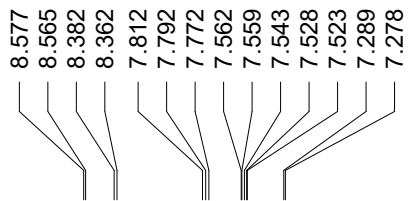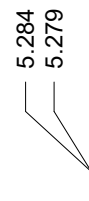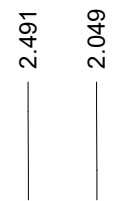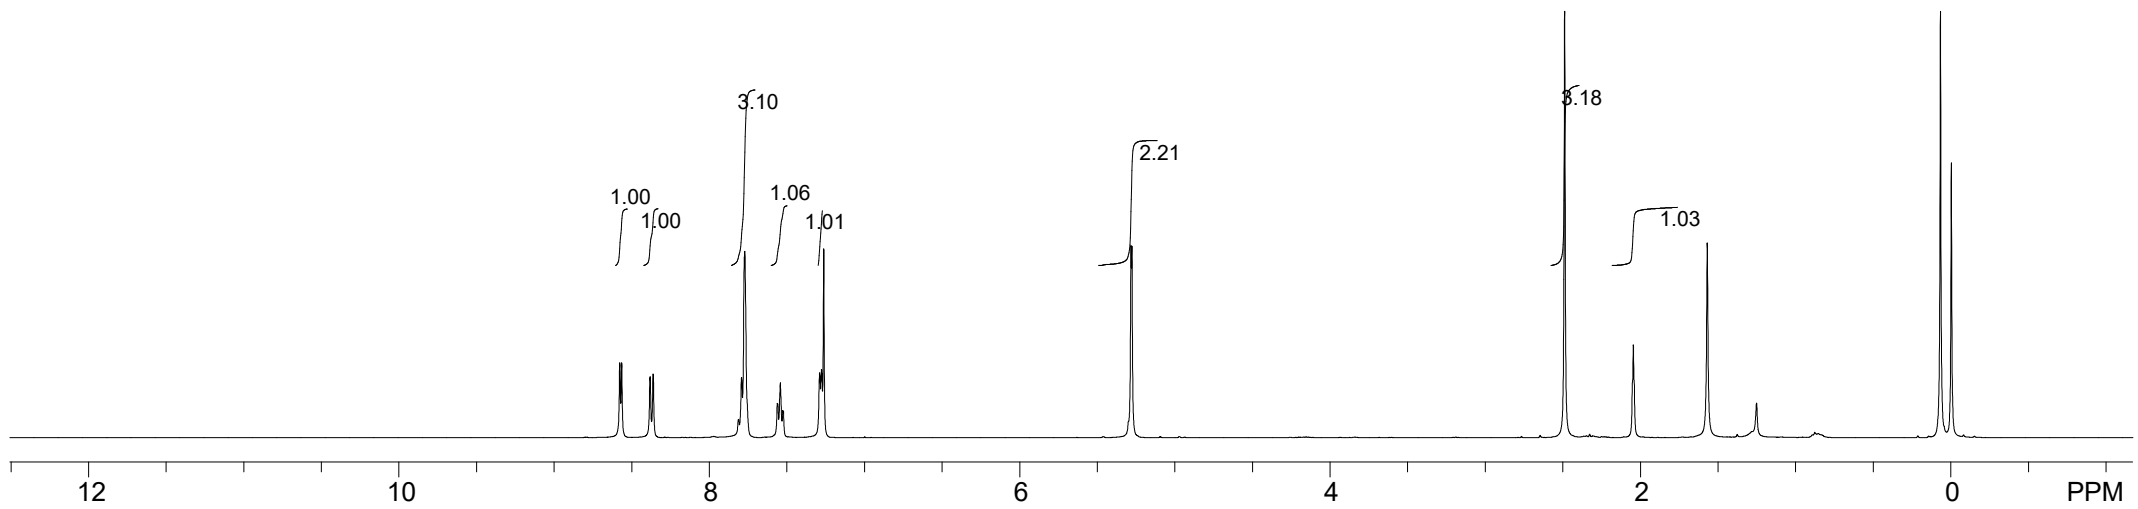

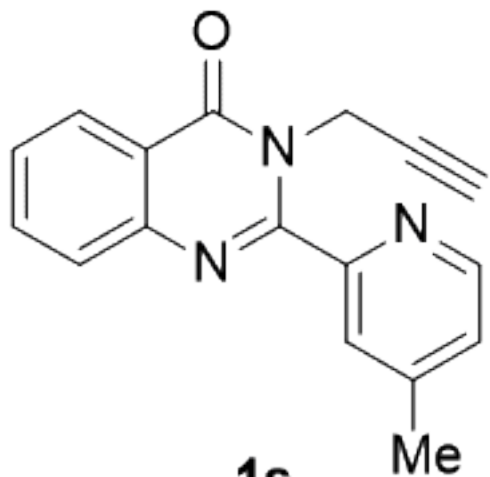

100 MHz, CDCl<sub>3</sub>

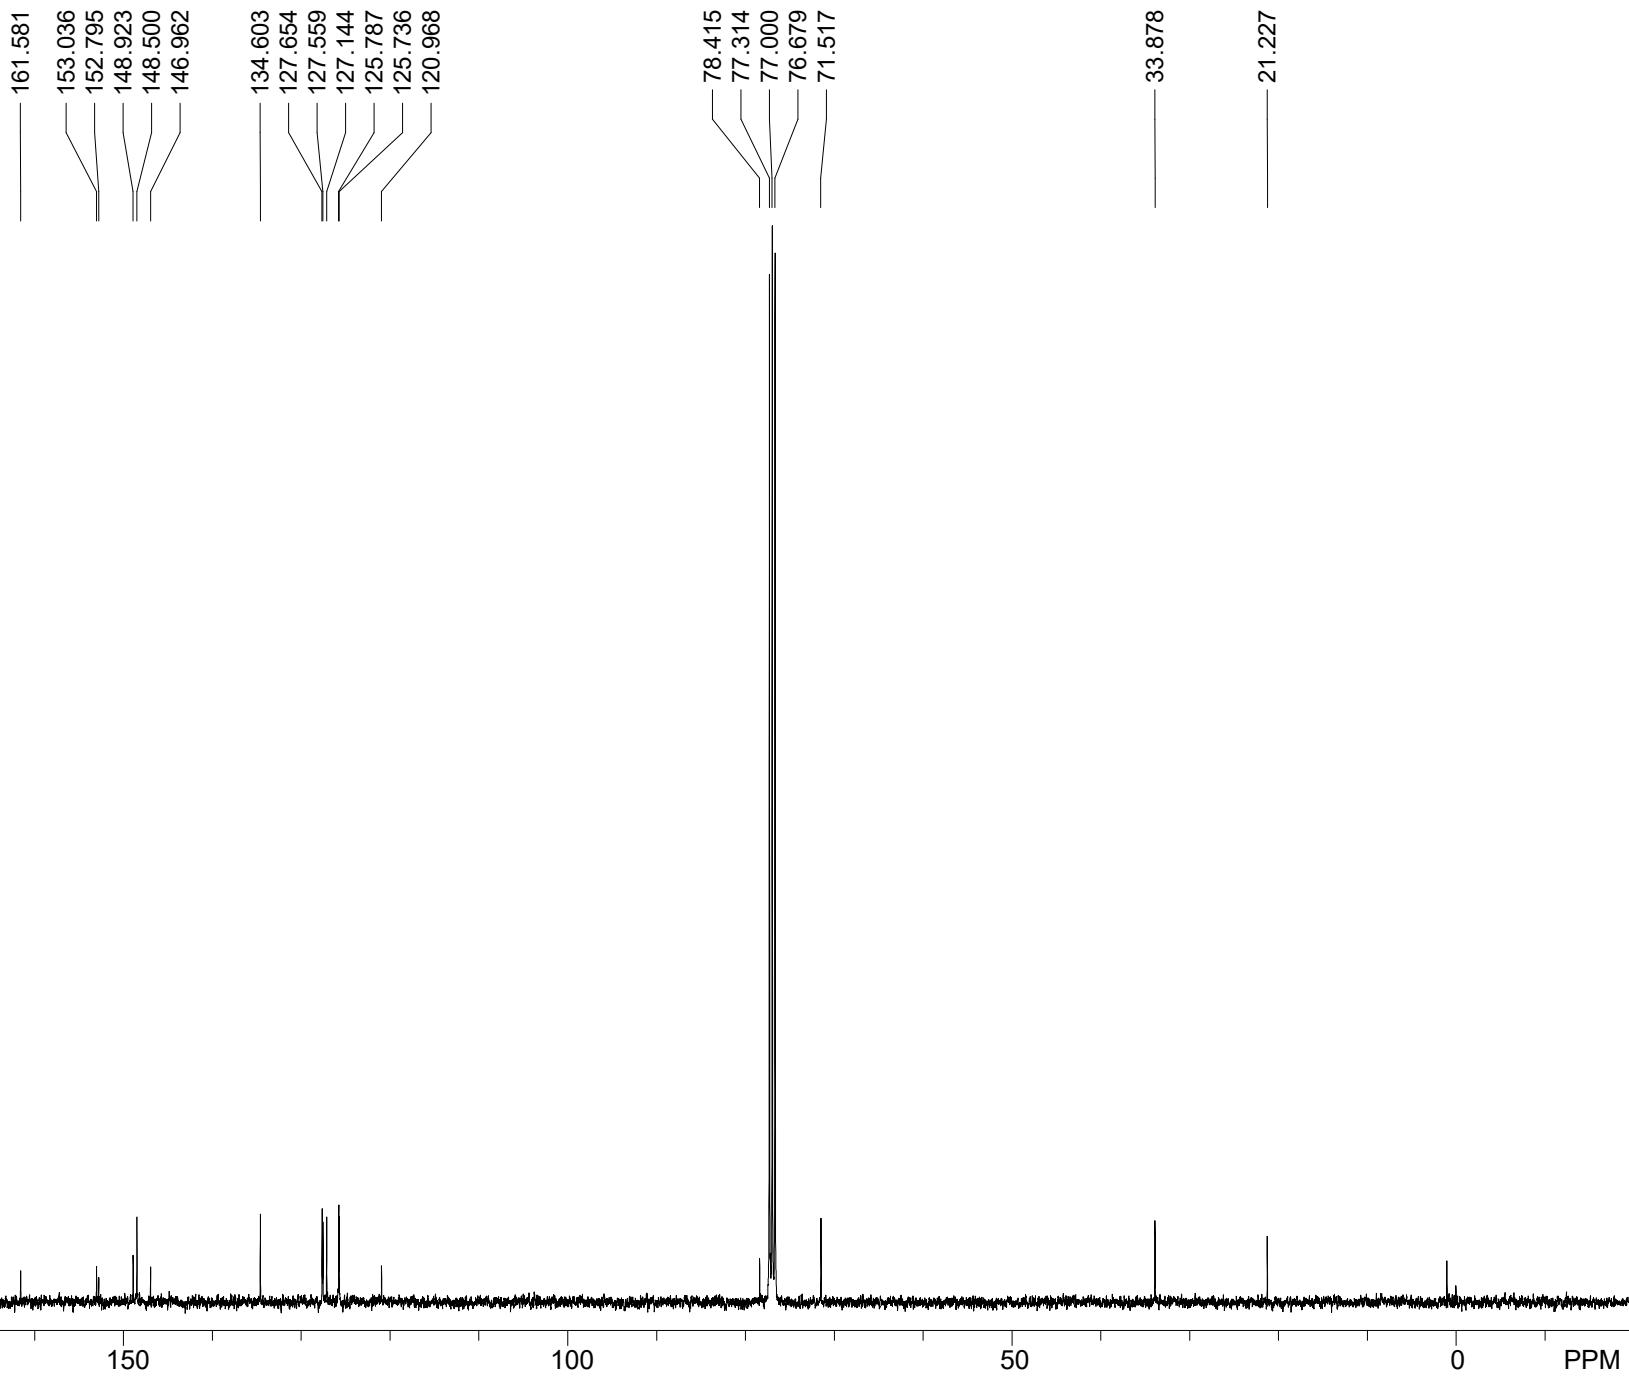

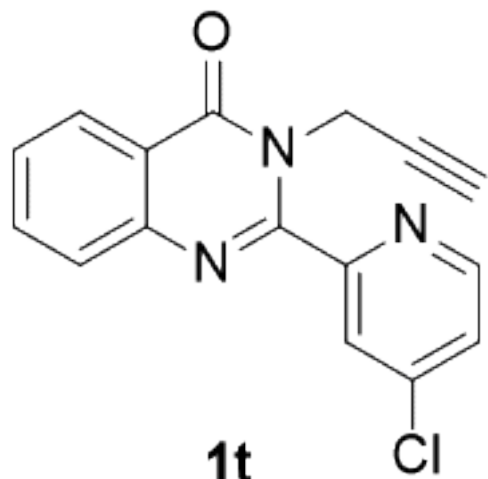

400 MHz, CDCl<sub>3</sub>

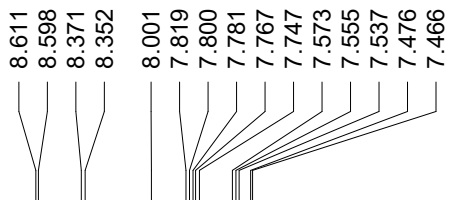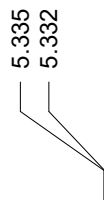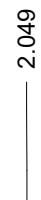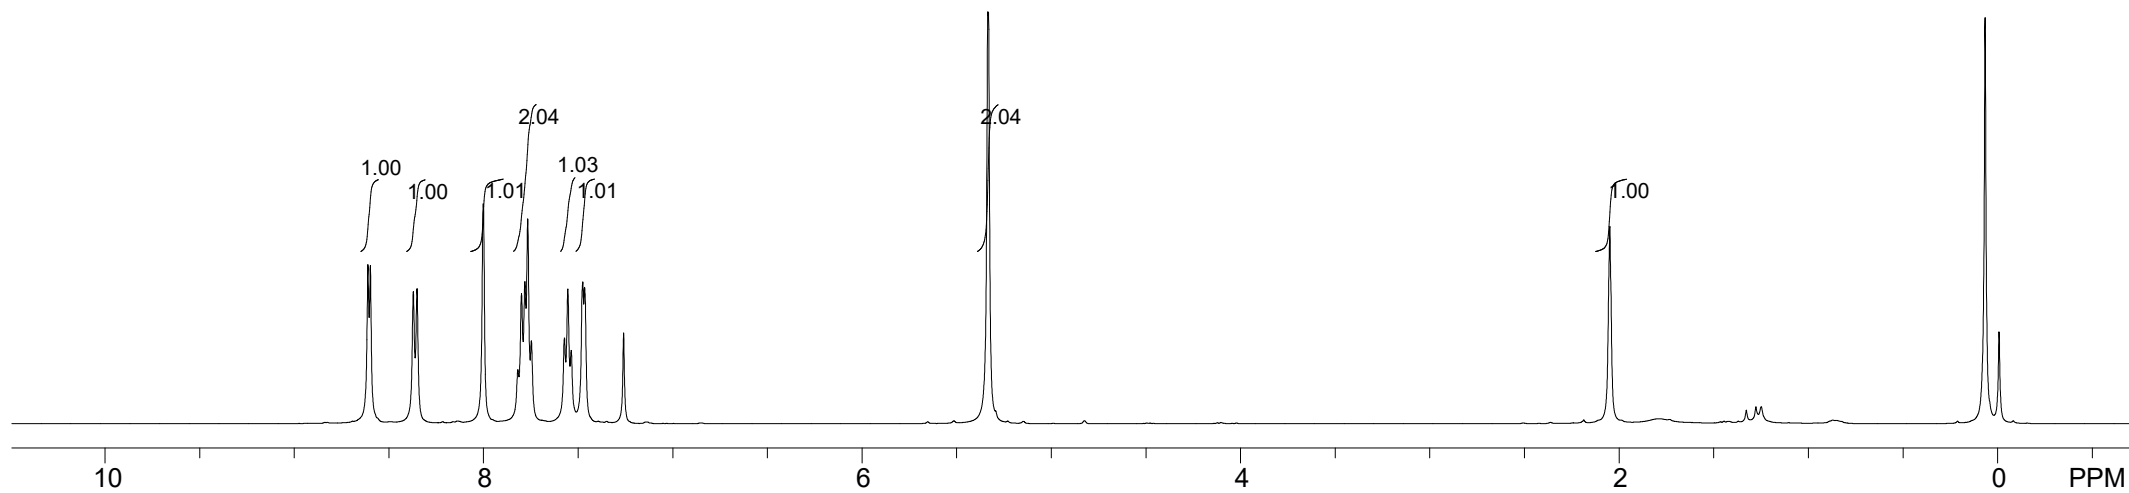

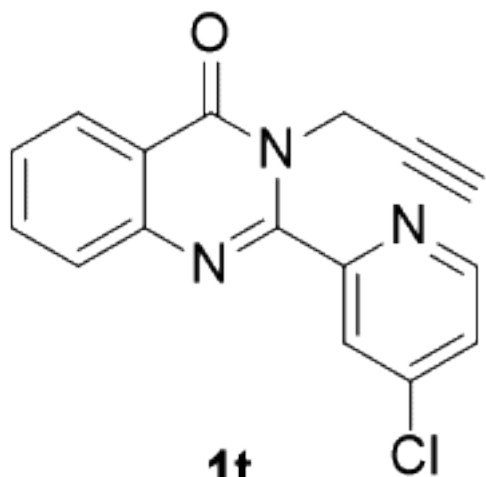

100 MHz, CDCl<sub>3</sub>

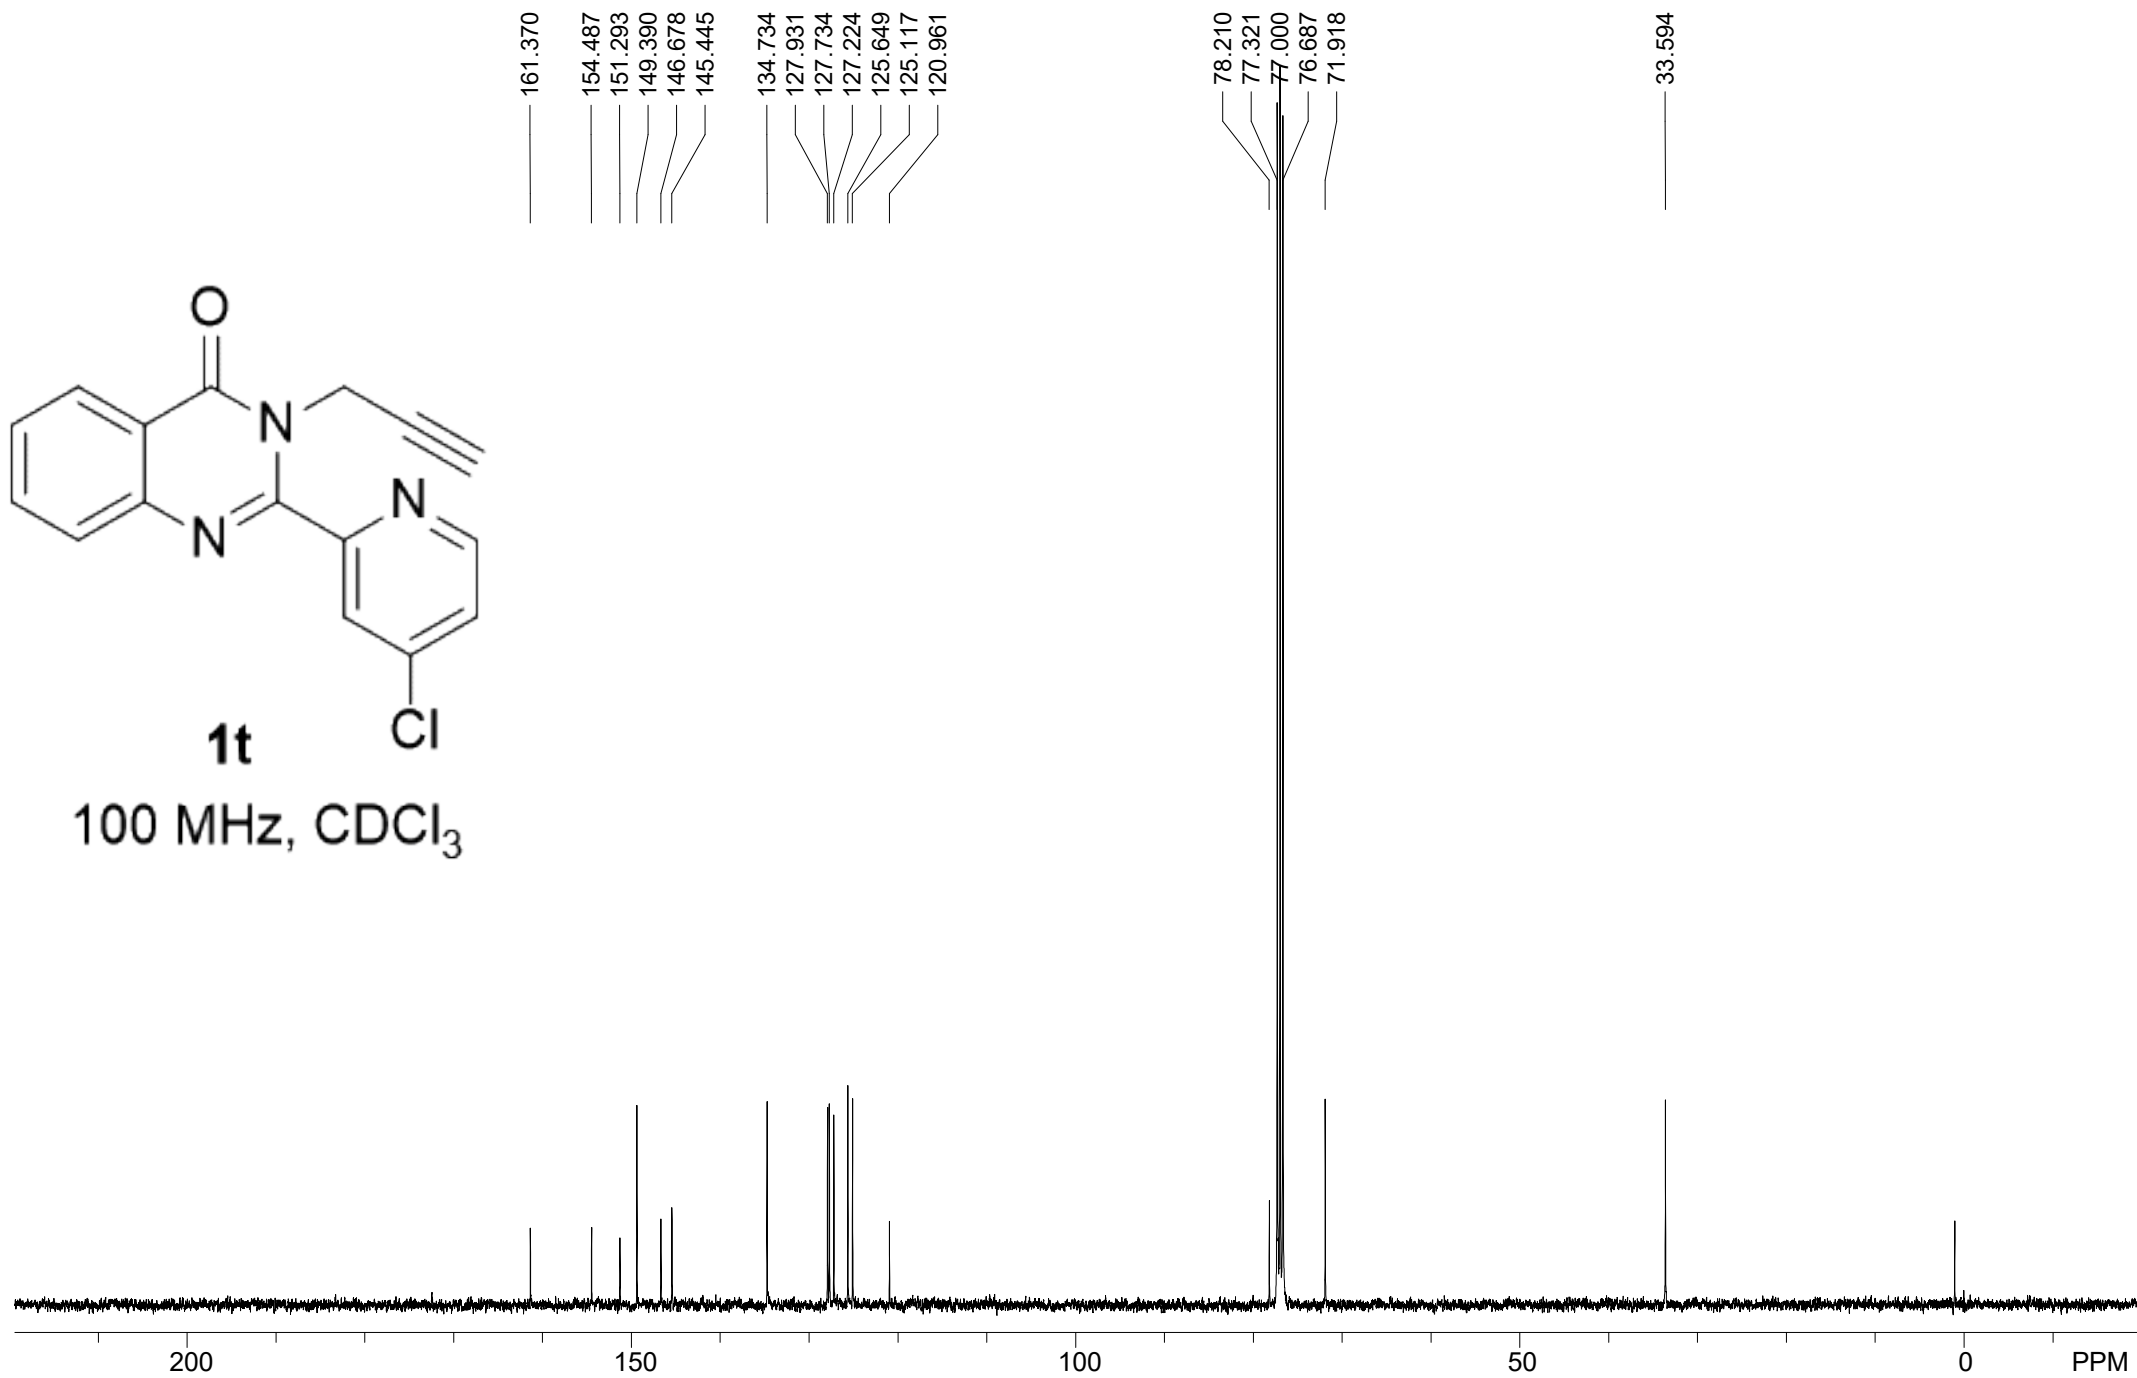



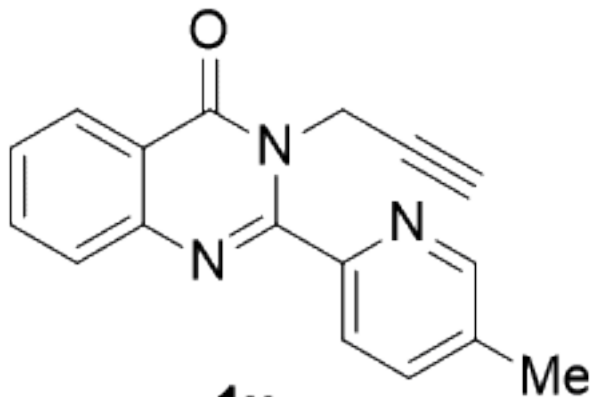

400 MHz, CDCl<sub>3</sub>

8.536  
8.364  
8.344  
7.857  
7.838  
7.792  
7.772  
7.754  
7.726  
7.705  
7.541  
7.538  
7.522  
7.506  
7.502

5.299  
5.294

2.451

2.033

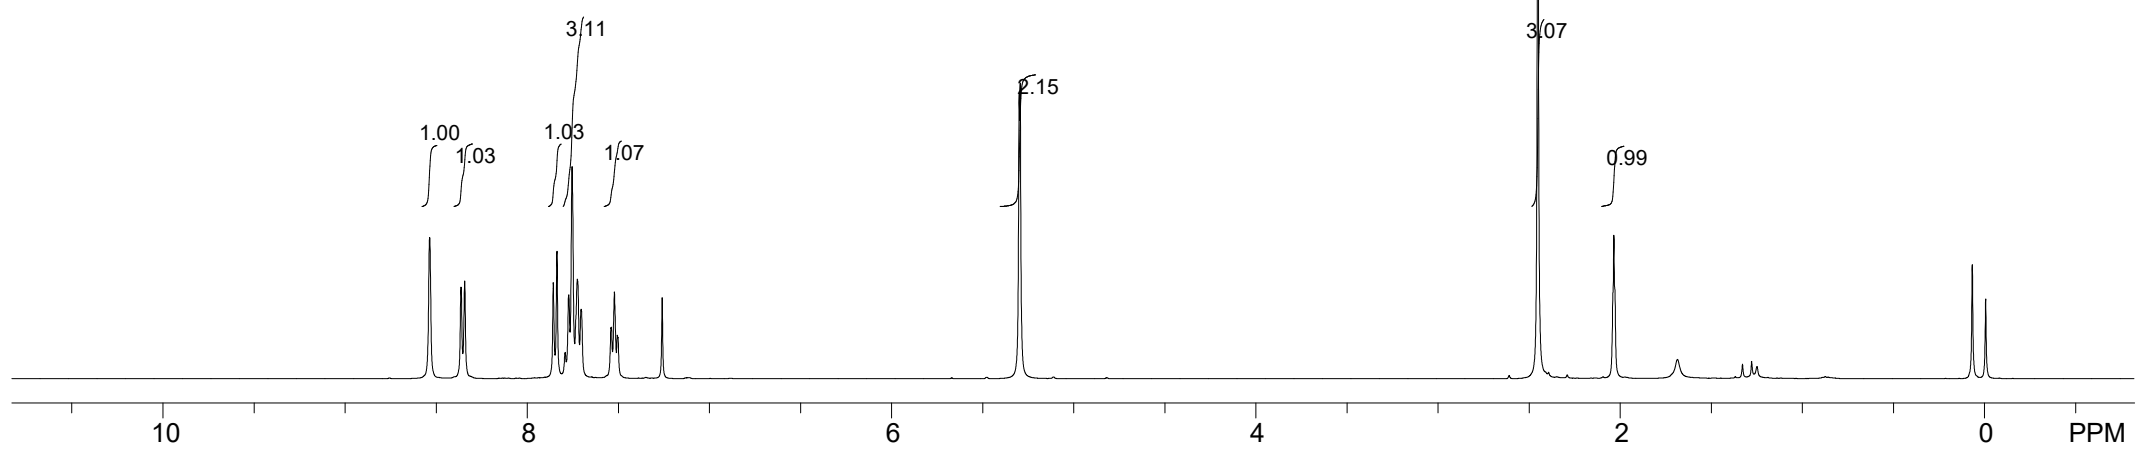

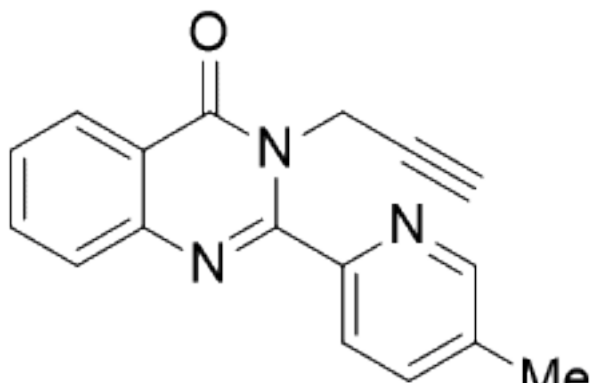

**1u**

100 MHz, CDCl<sub>3</sub>

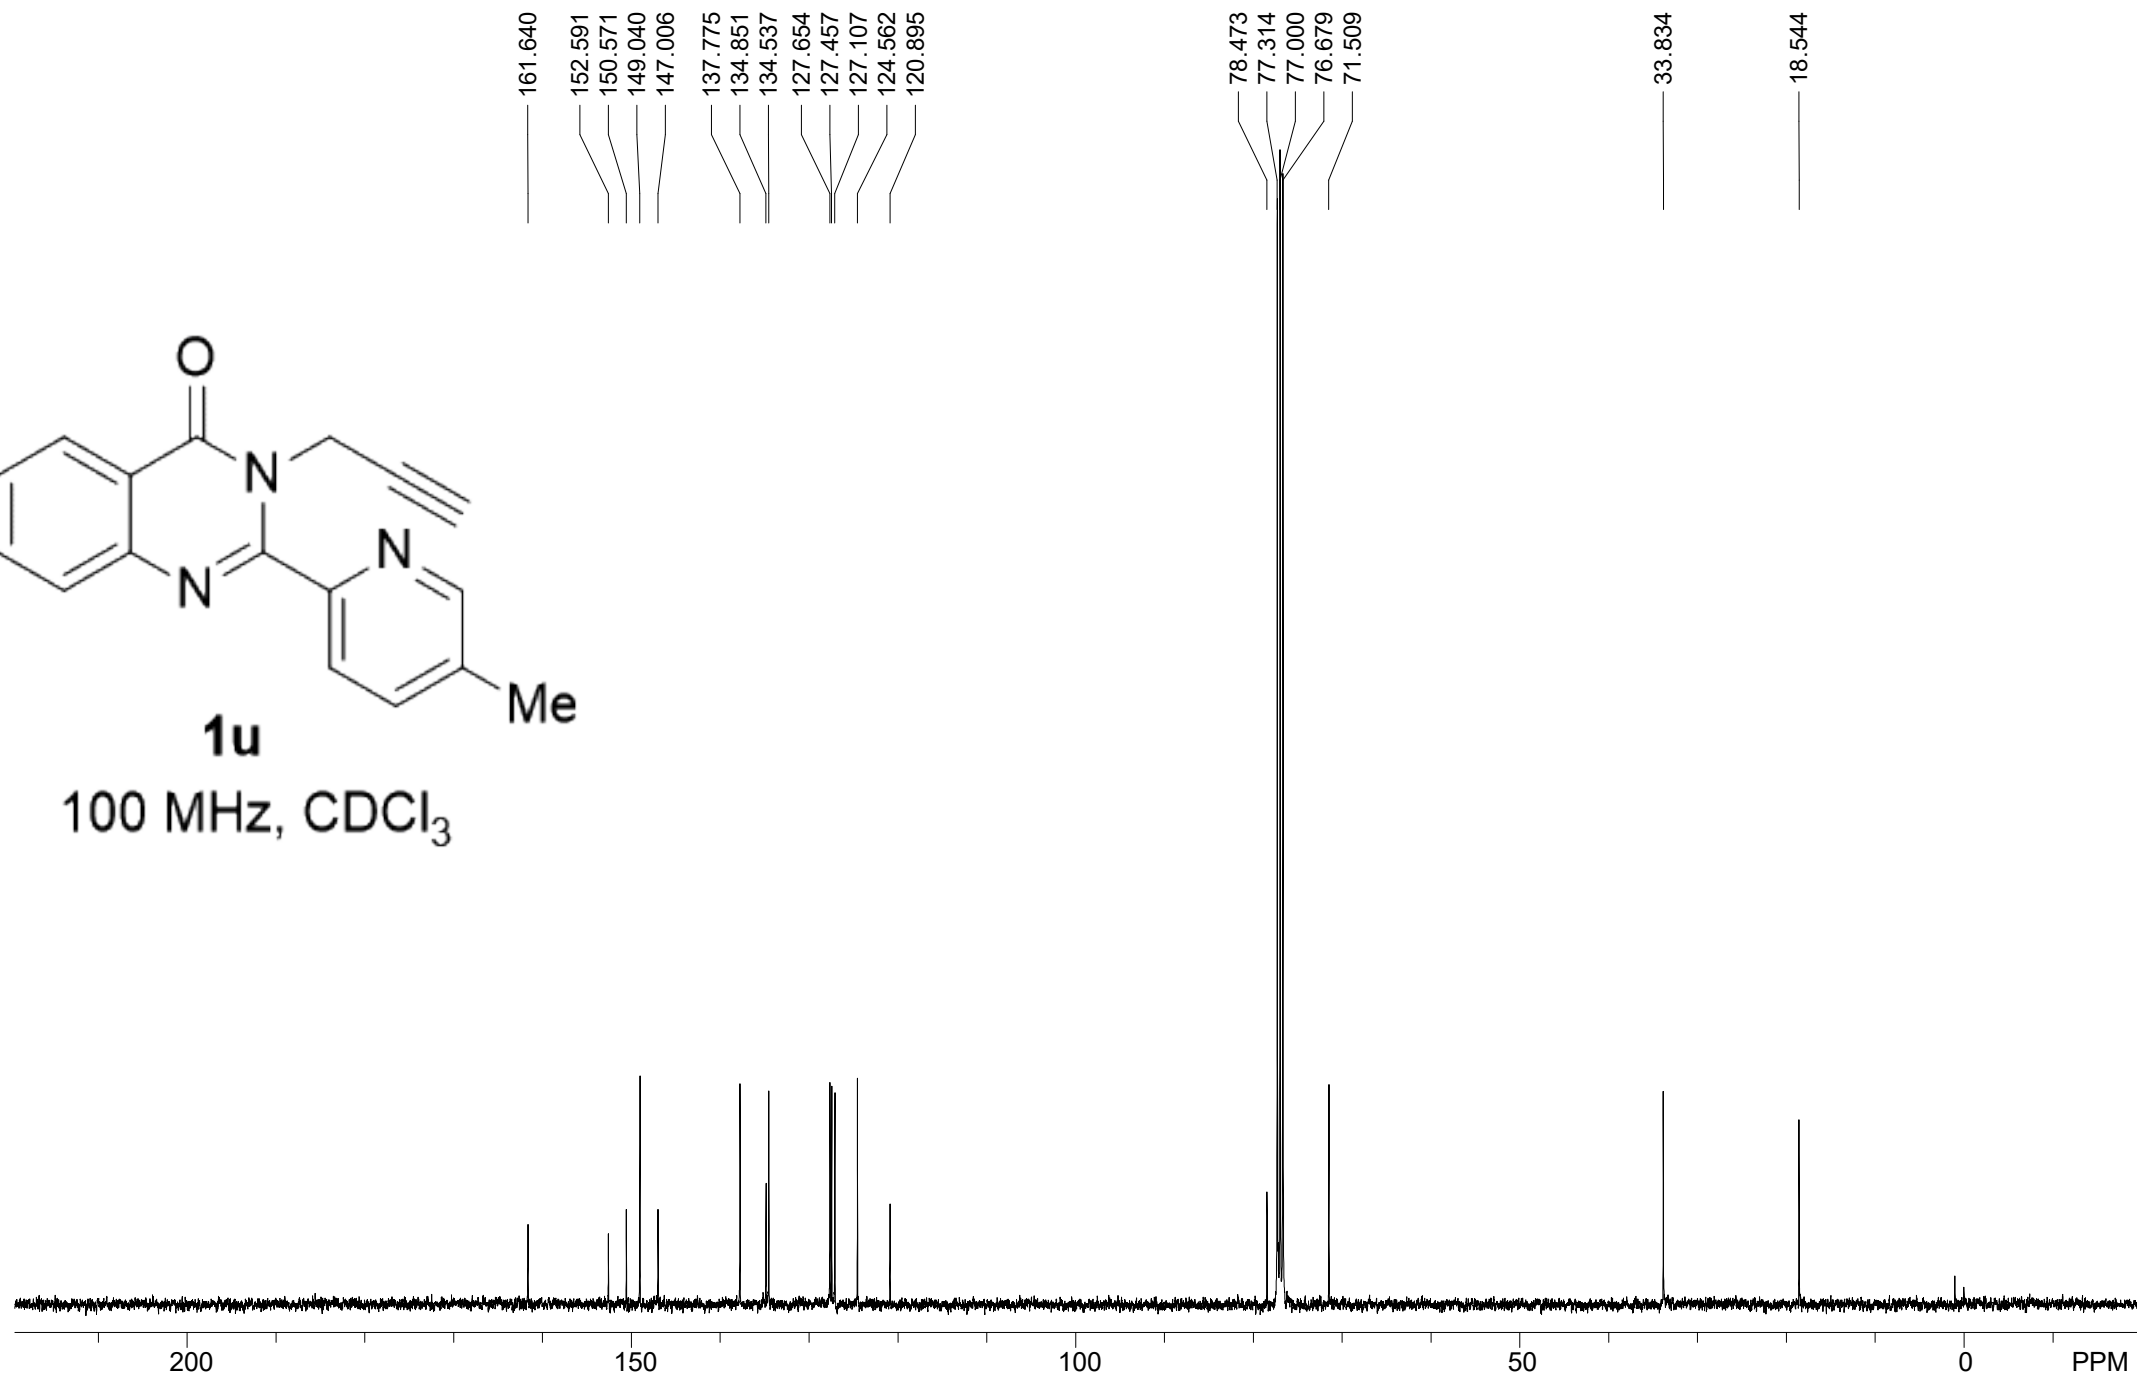

8.753  
8.742  
8.398  
8.378  
7.963  
7.944  
7.918  
7.901  
7.814  
7.793  
7.777  
7.761  
7.569  
7.565  
7.550  
7.534  
7.529  
7.489  
7.476  
7.462  
7.254  
7.236  
7.227  
7.208  
7.191  
7.152  
7.135  
5.572

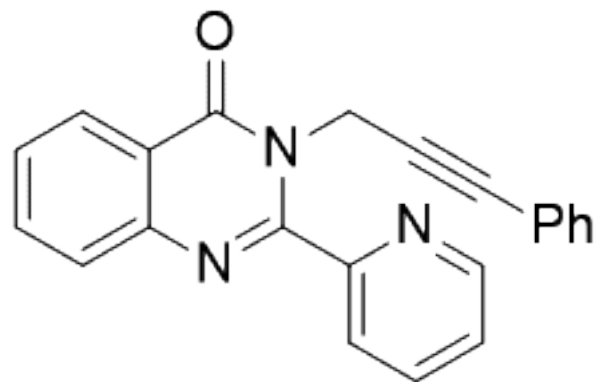

**1v**

400 MHz, CDCl<sub>3</sub>

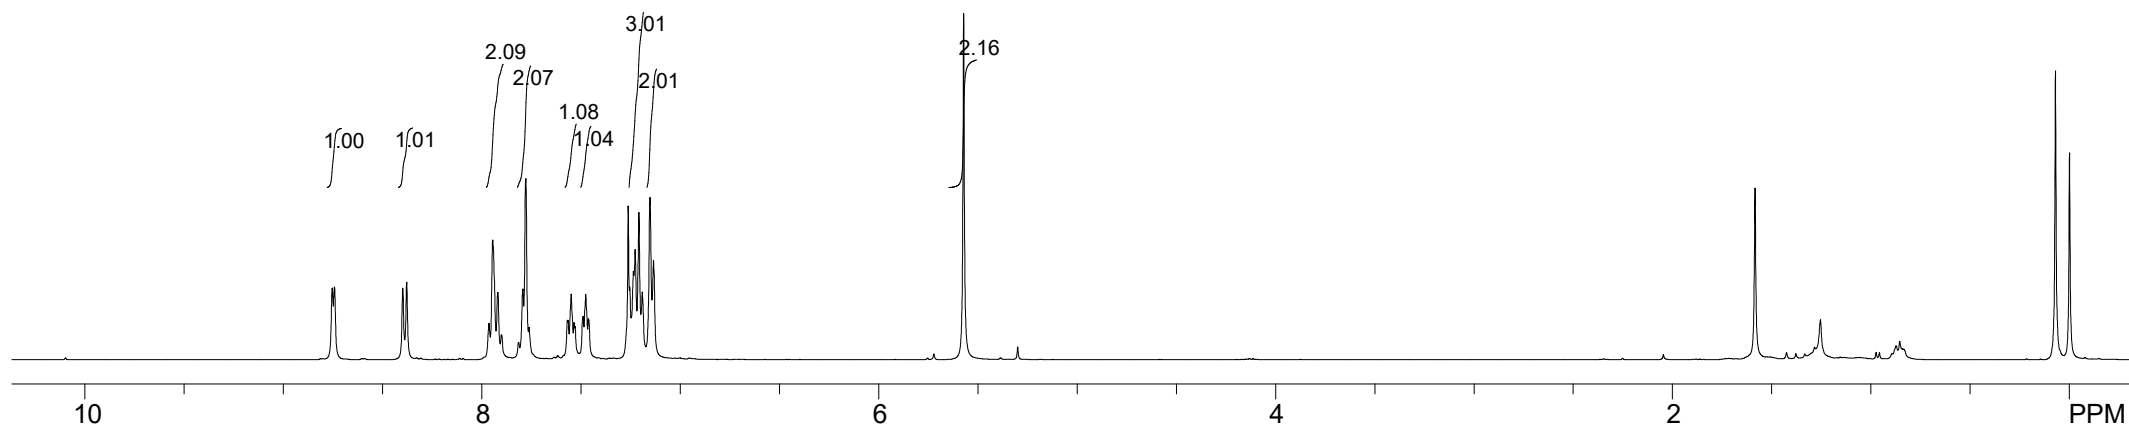

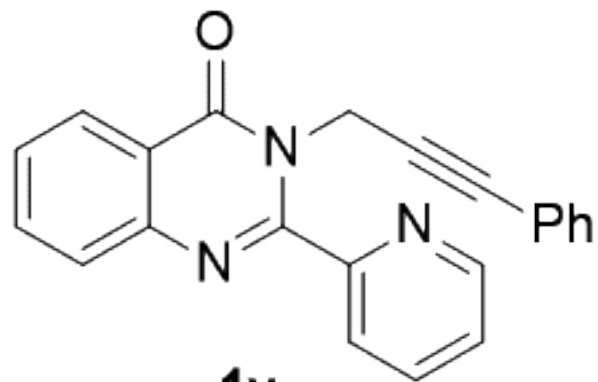

**1v**

100 MHz, CDCl<sub>3</sub>

161.538  
153.634  
152.751  
148.668  
146.977  
137.250  
134.537  
131.664  
128.398  
128.099  
127.683  
127.559  
127.202  
124.949  
124.650  
122.156  
121.012

83.861  
83.322  
77.321  
77.000  
76.687

34.119

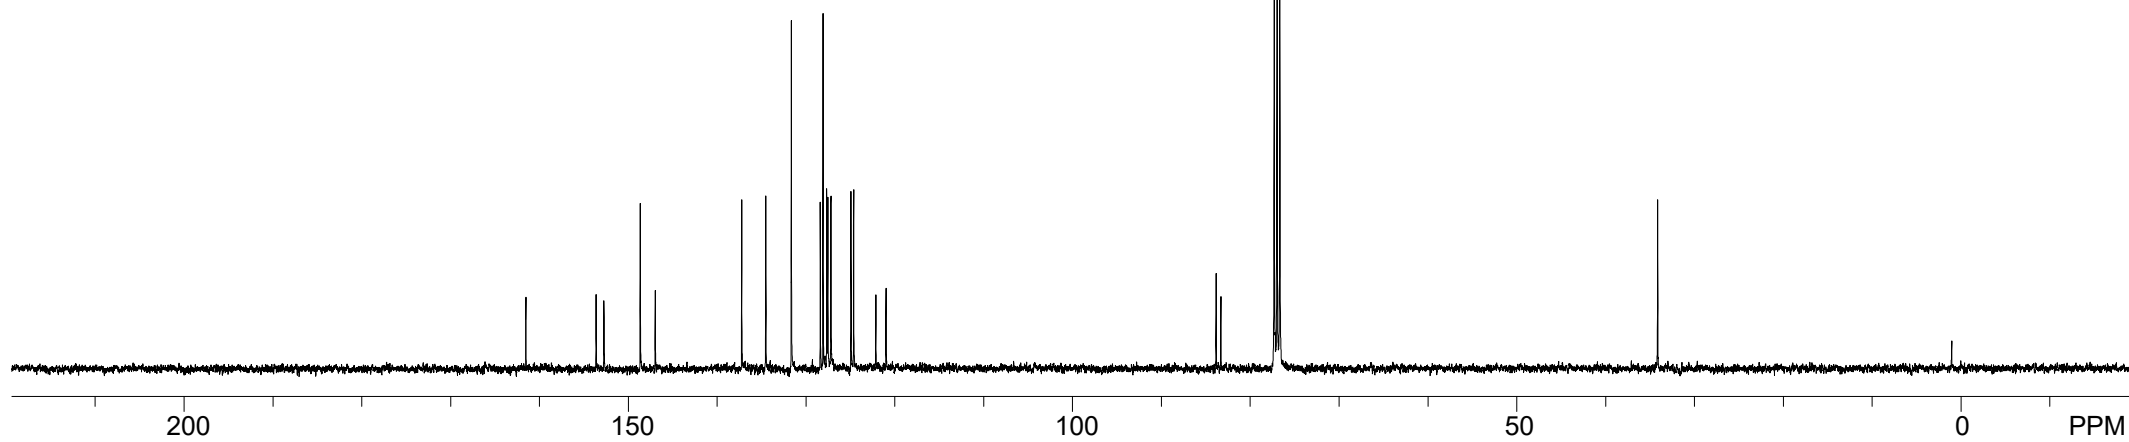

8.743  
8.731  
8.389  
8.369  
7.948  
7.928  
7.904  
7.886  
7.781  
7.767  
7.753  
7.556  
7.552  
7.537  
7.523  
7.517  
7.476  
7.463  
7.449  
7.044  
7.023  
7.016  
6.995  
5.551

2.283

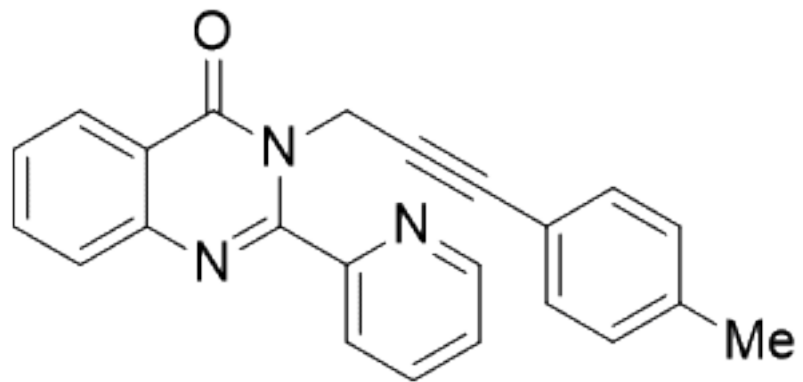

**1w**

400 MHz, CDCl<sub>3</sub>

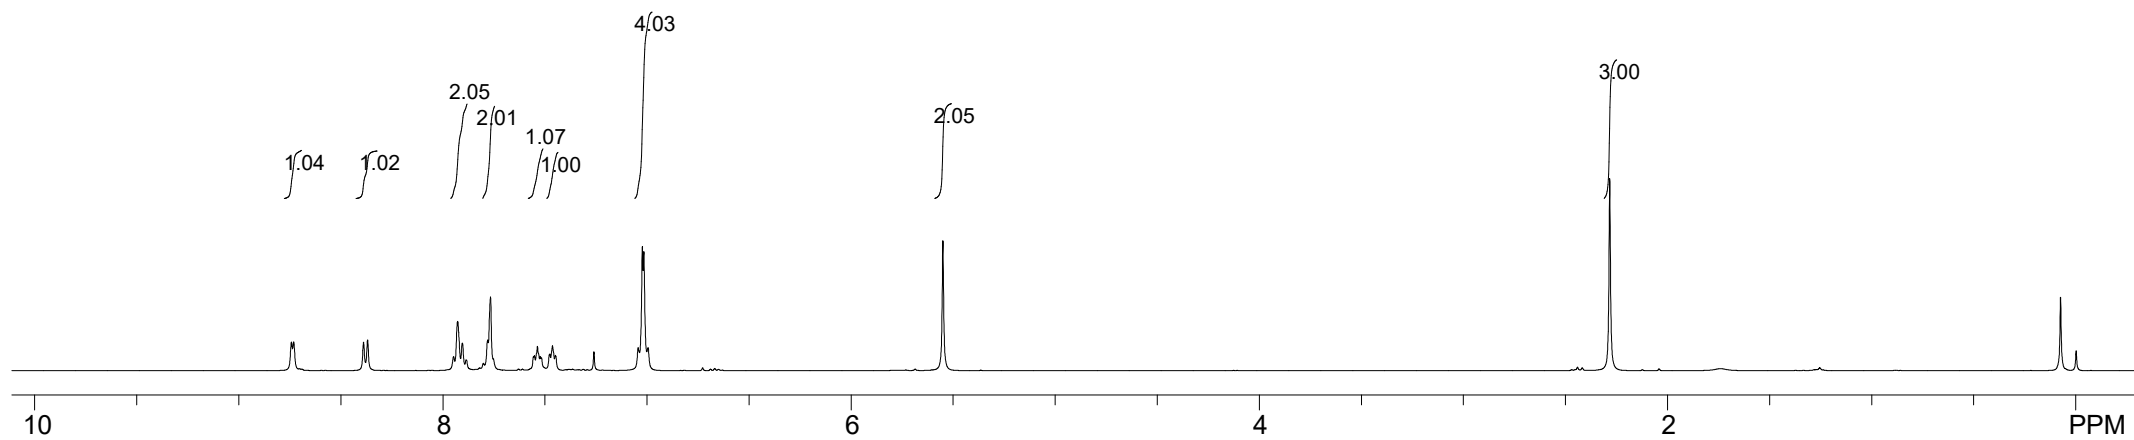

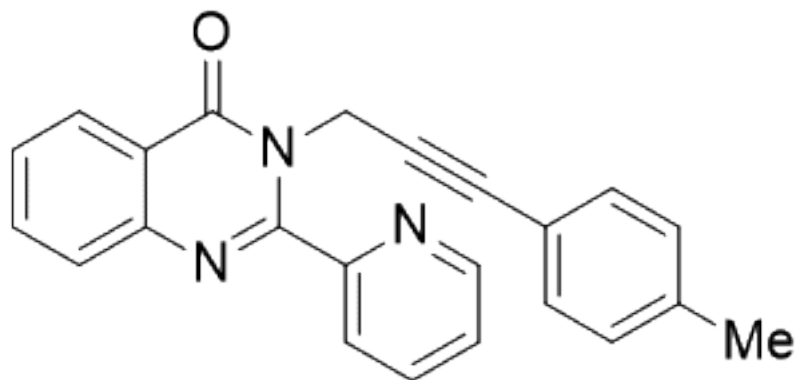

**1w**

100 MHz, CDCl<sub>3</sub>

161.523  
153.656  
152.824  
148.661  
146.977  
138.555  
137.221  
134.501  
131.555  
128.857  
127.661  
127.523  
127.202  
124.934  
124.614  
121.019  
119.050

83.468  
83.125  
77.321  
77.000  
76.687

34.141

21.395

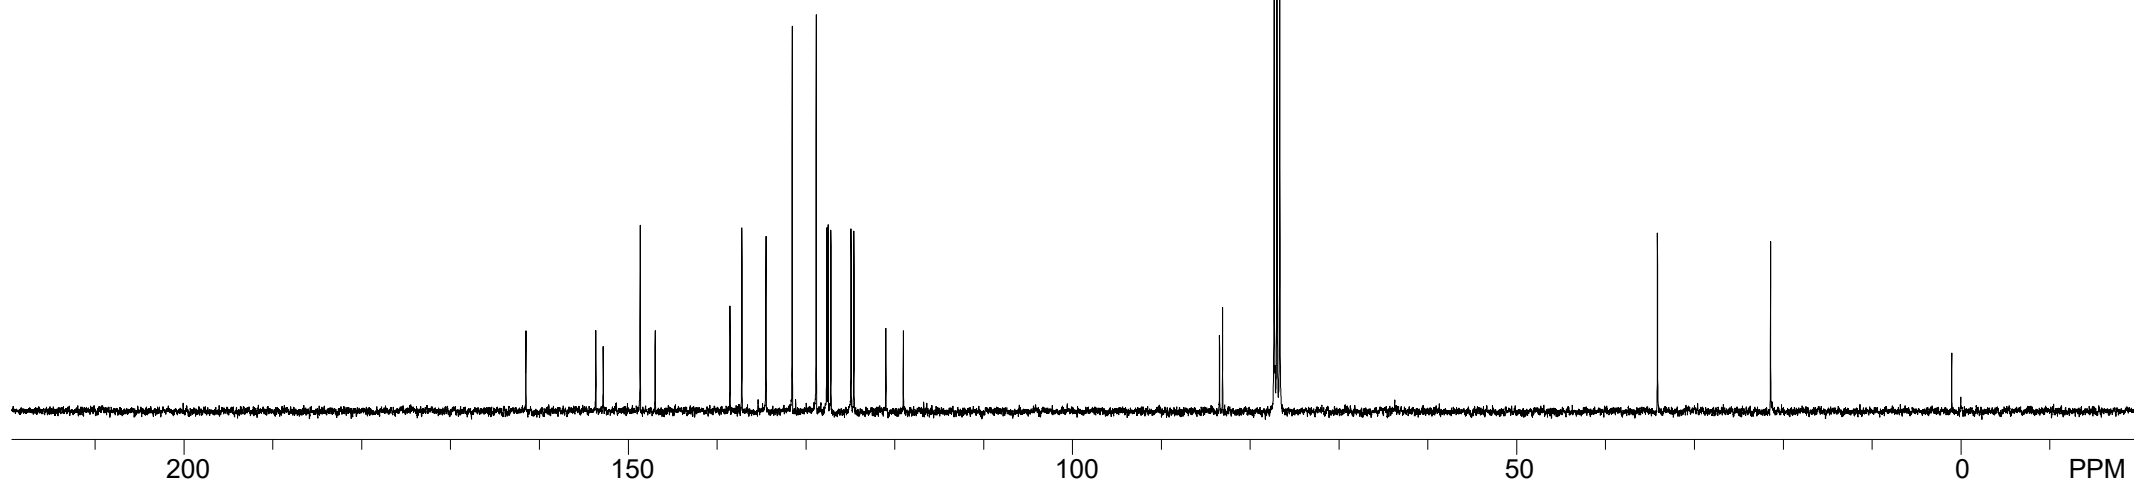

8.757  
8.746  
8.398  
8.379  
7.979  
7.960  
7.943  
7.924  
7.905  
7.803  
7.787  
7.770  
7.578  
7.574  
7.558  
7.543  
7.539  
7.483  
7.463  
7.270  
7.251  
5.609

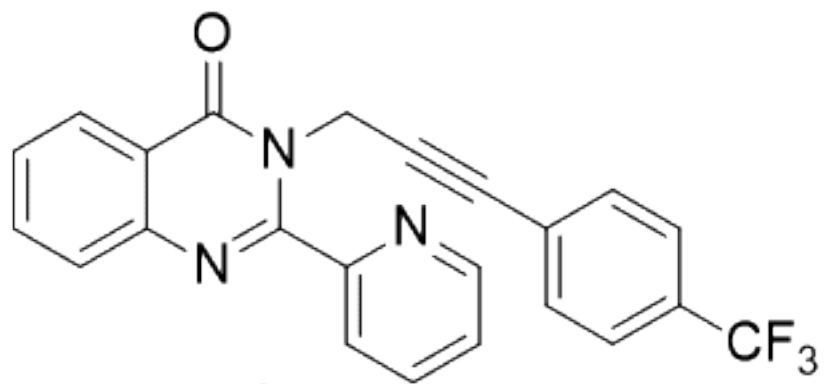

**1x**

400 MHz, CDCl<sub>3</sub>

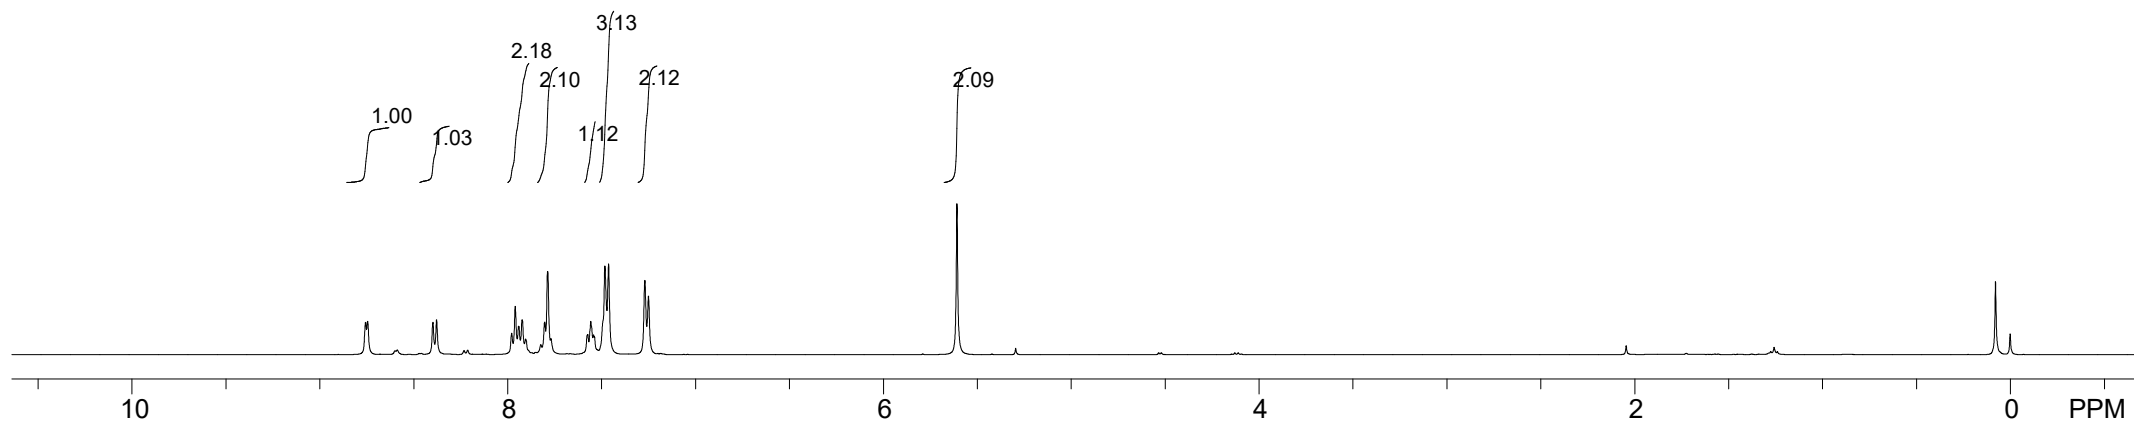

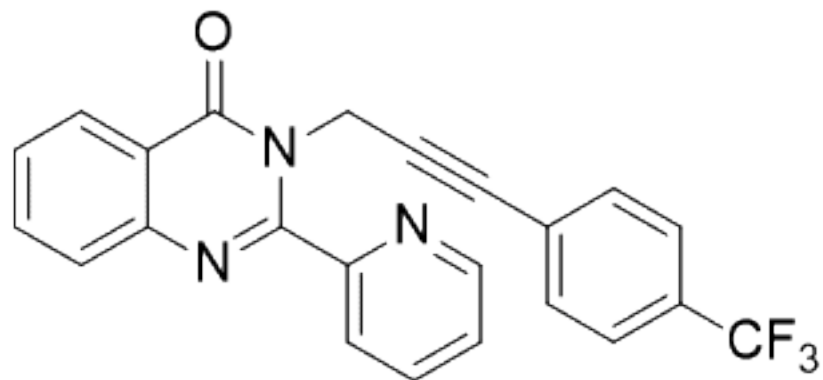

**1x**

100 MHz, CDCl<sub>3</sub>

161.560  
153.539  
152.474  
149.492  
148.683  
146.940  
137.425  
137.323  
137.170  
134.661  
131.898  
130.607  
130.279  
129.958  
129.630  
127.880  
127.742  
127.683  
127.217  
125.999  
125.080  
125.044  
124.971  
124.759  
122.375  
120.946  
86.494  
81.944  
77.321  
77.000  
76.687  
34.126

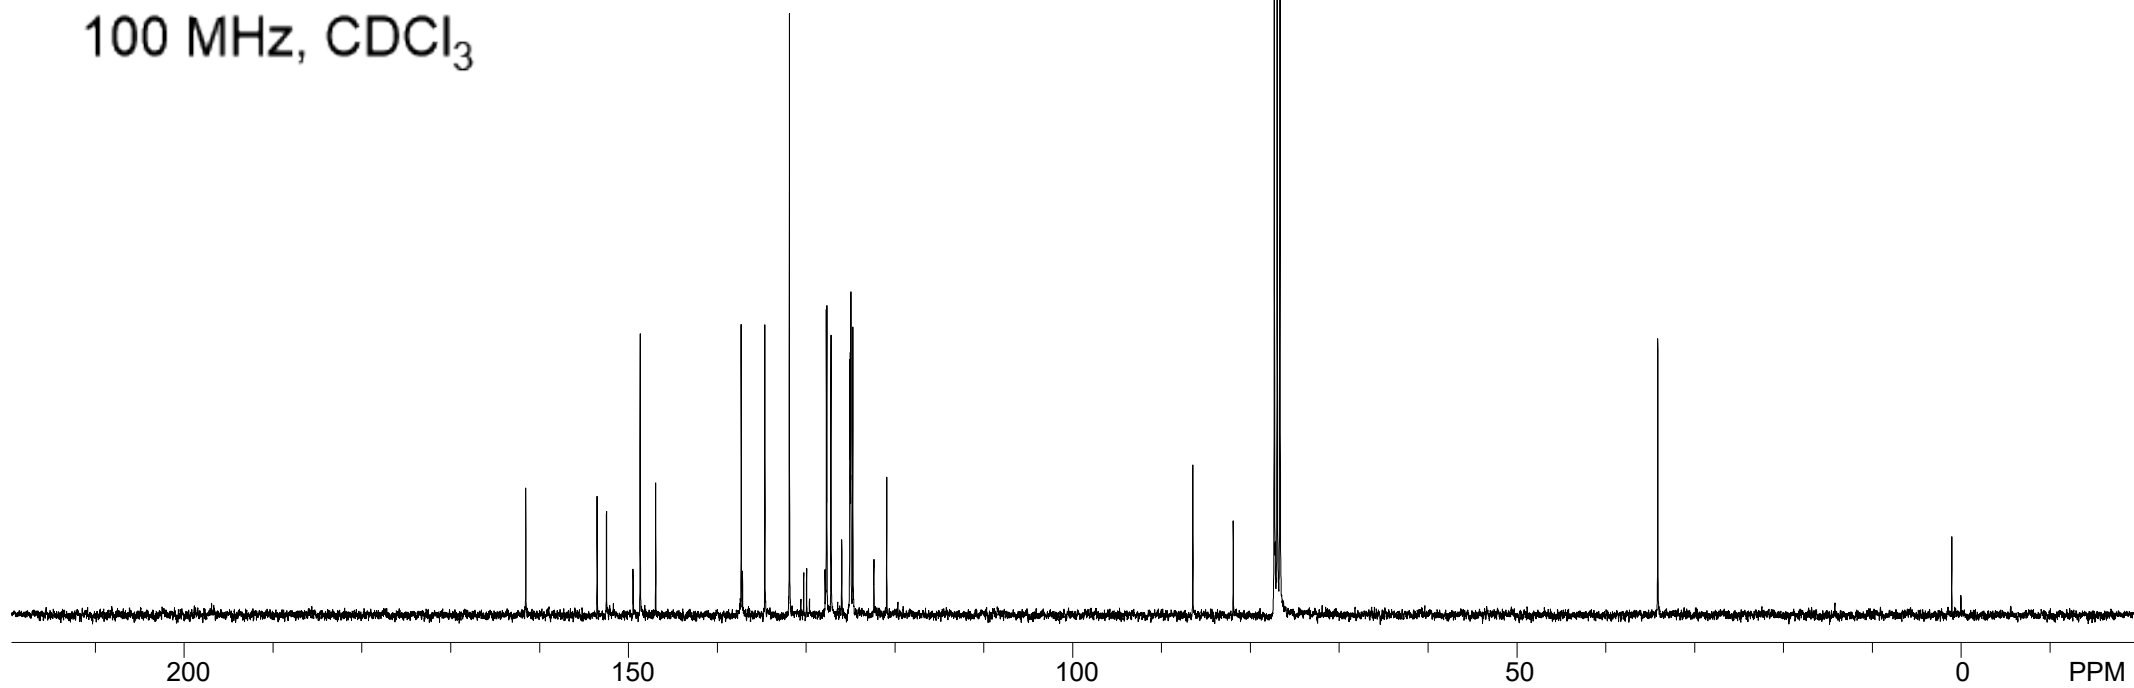



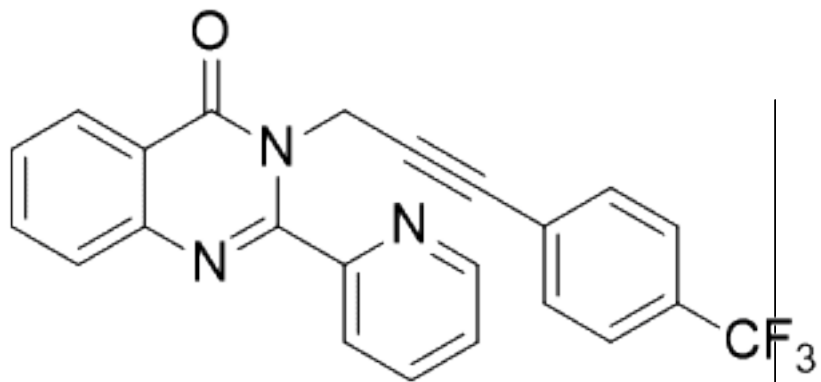

**1x**

376 MHz, CDCl<sub>3</sub>

62.913

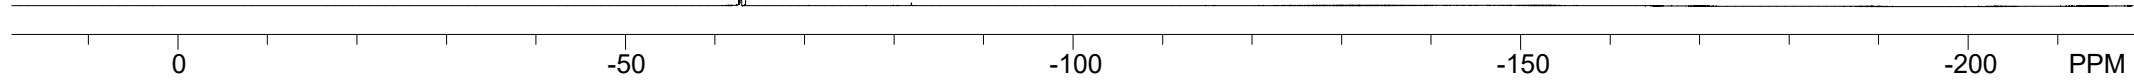

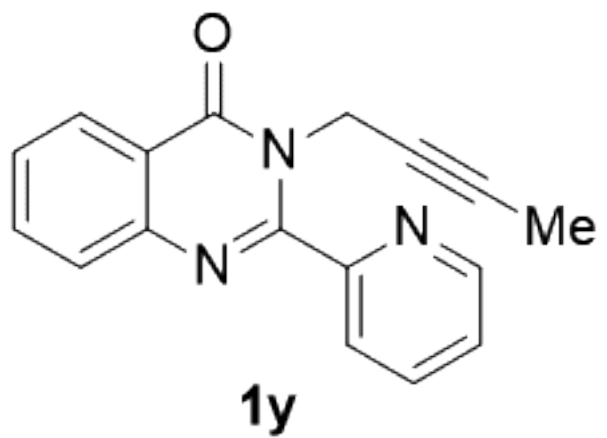

400 MHz, CDCl<sub>3</sub>

8.719  
8.708  
8.374  
8.355  
7.941  
7.922  
7.907  
7.892  
7.795  
7.775  
7.759  
7.742  
7.548  
7.544  
7.528  
7.514  
7.509  
7.489  
7.471  
7.467  
7.455  
7.444  
7.438  
5.177  
5.172

1.602

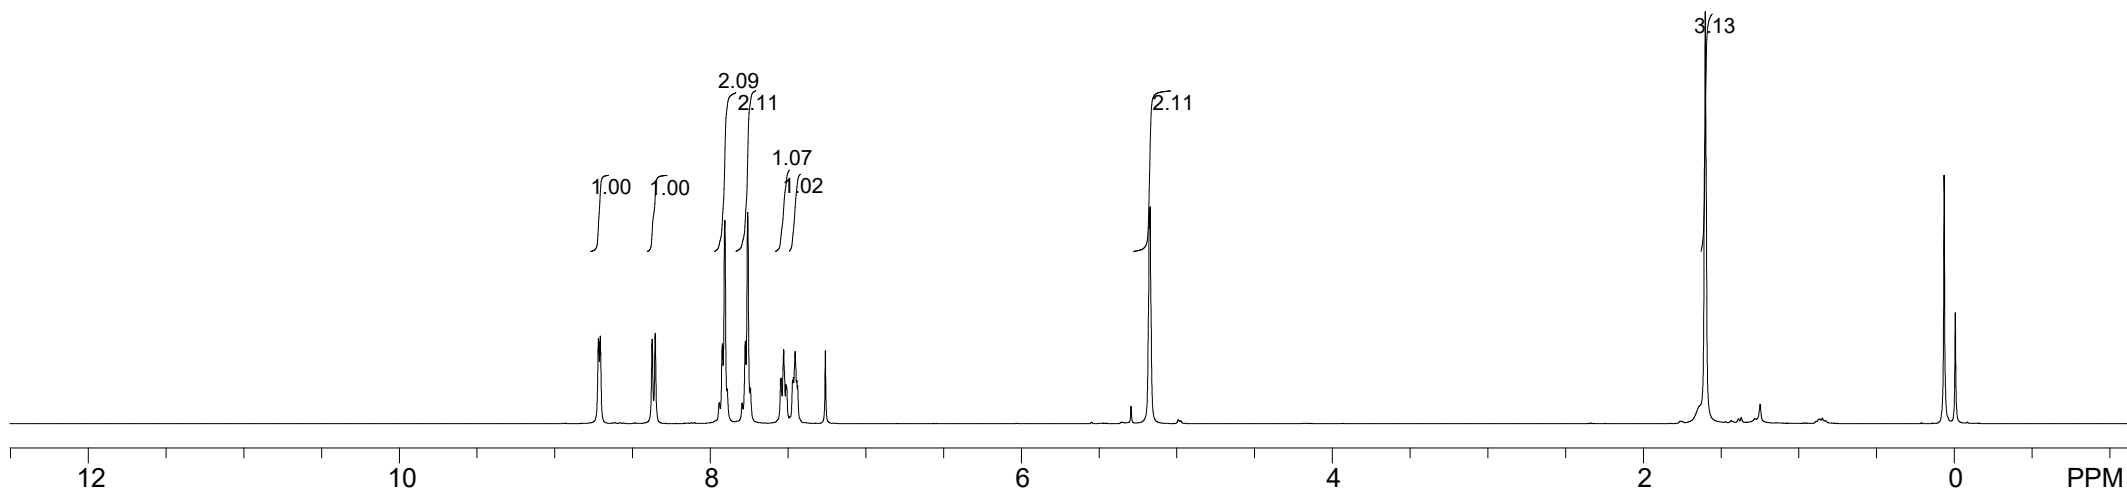

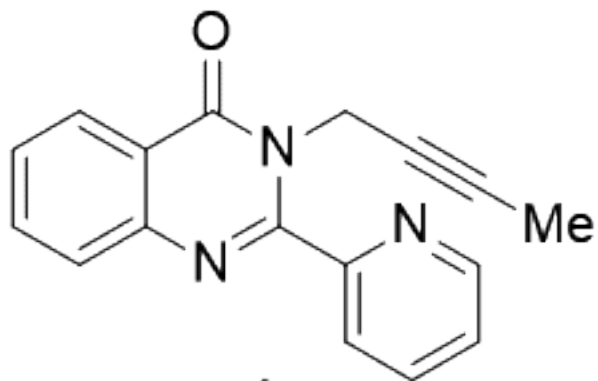

**1y**

100 MHz, CDCl<sub>3</sub>

161.567  
153.539  
152.926  
148.705  
146.991  
137.162  
134.435  
127.618  
127.443  
127.115  
124.738  
124.592  
121.063

79.632  
77.314  
77.000  
76.679  
73.624

34.199

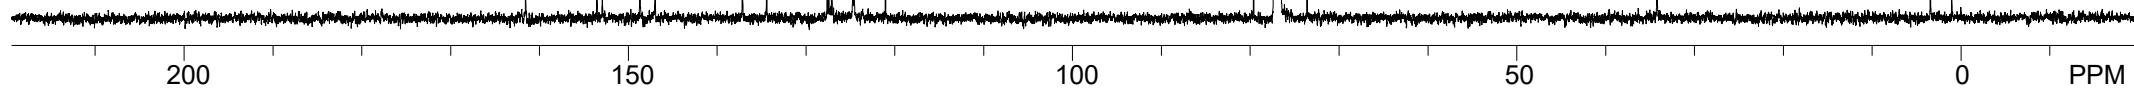

8.711  
8.700  
8.341  
8.320  
7.927  
7.896  
7.785  
7.765  
7.748  
7.729  
7.536  
7.517  
7.501  
7.464  
7.451  
7.445

4.374  
4.356  
4.337

2.800  
2.787  
2.783  
2.770

1.883

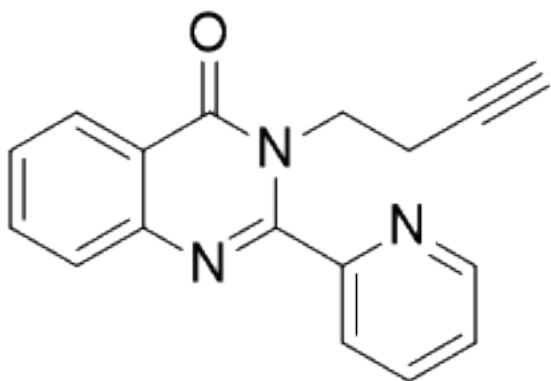

**1z**

400 MHz, CDCl<sub>3</sub>

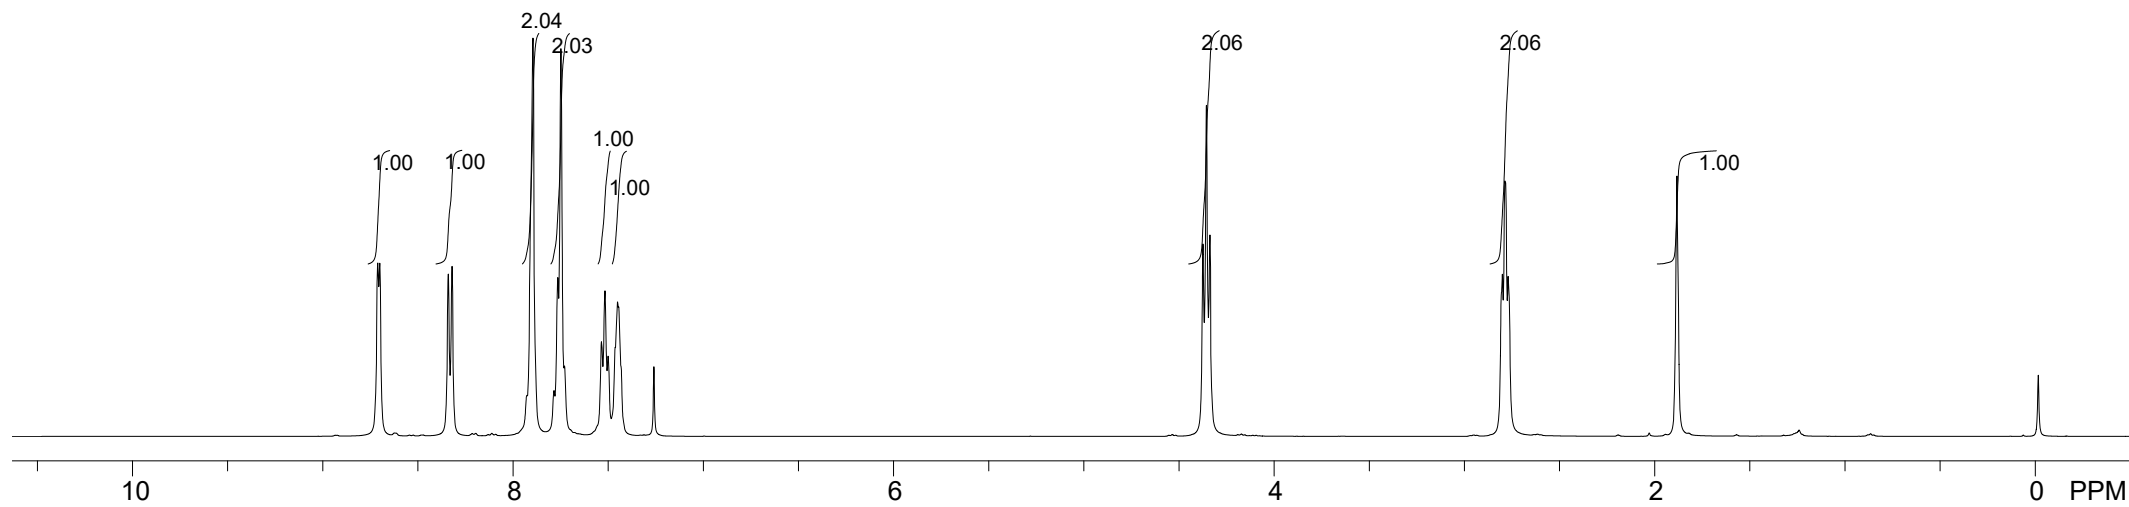

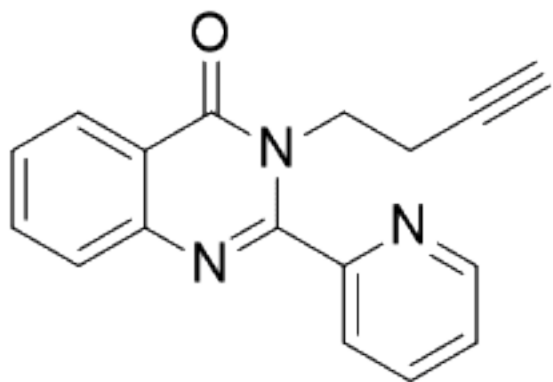

**1z**

100 MHz, CDCl<sub>3</sub>

162.085  
153.670  
153.546  
148.617  
146.874  
137.395  
134.413  
127.530  
127.421  
126.786  
125.131  
124.730  
120.924

80.646  
77.321  
77.000  
76.686  
70.168

44.261

18.354

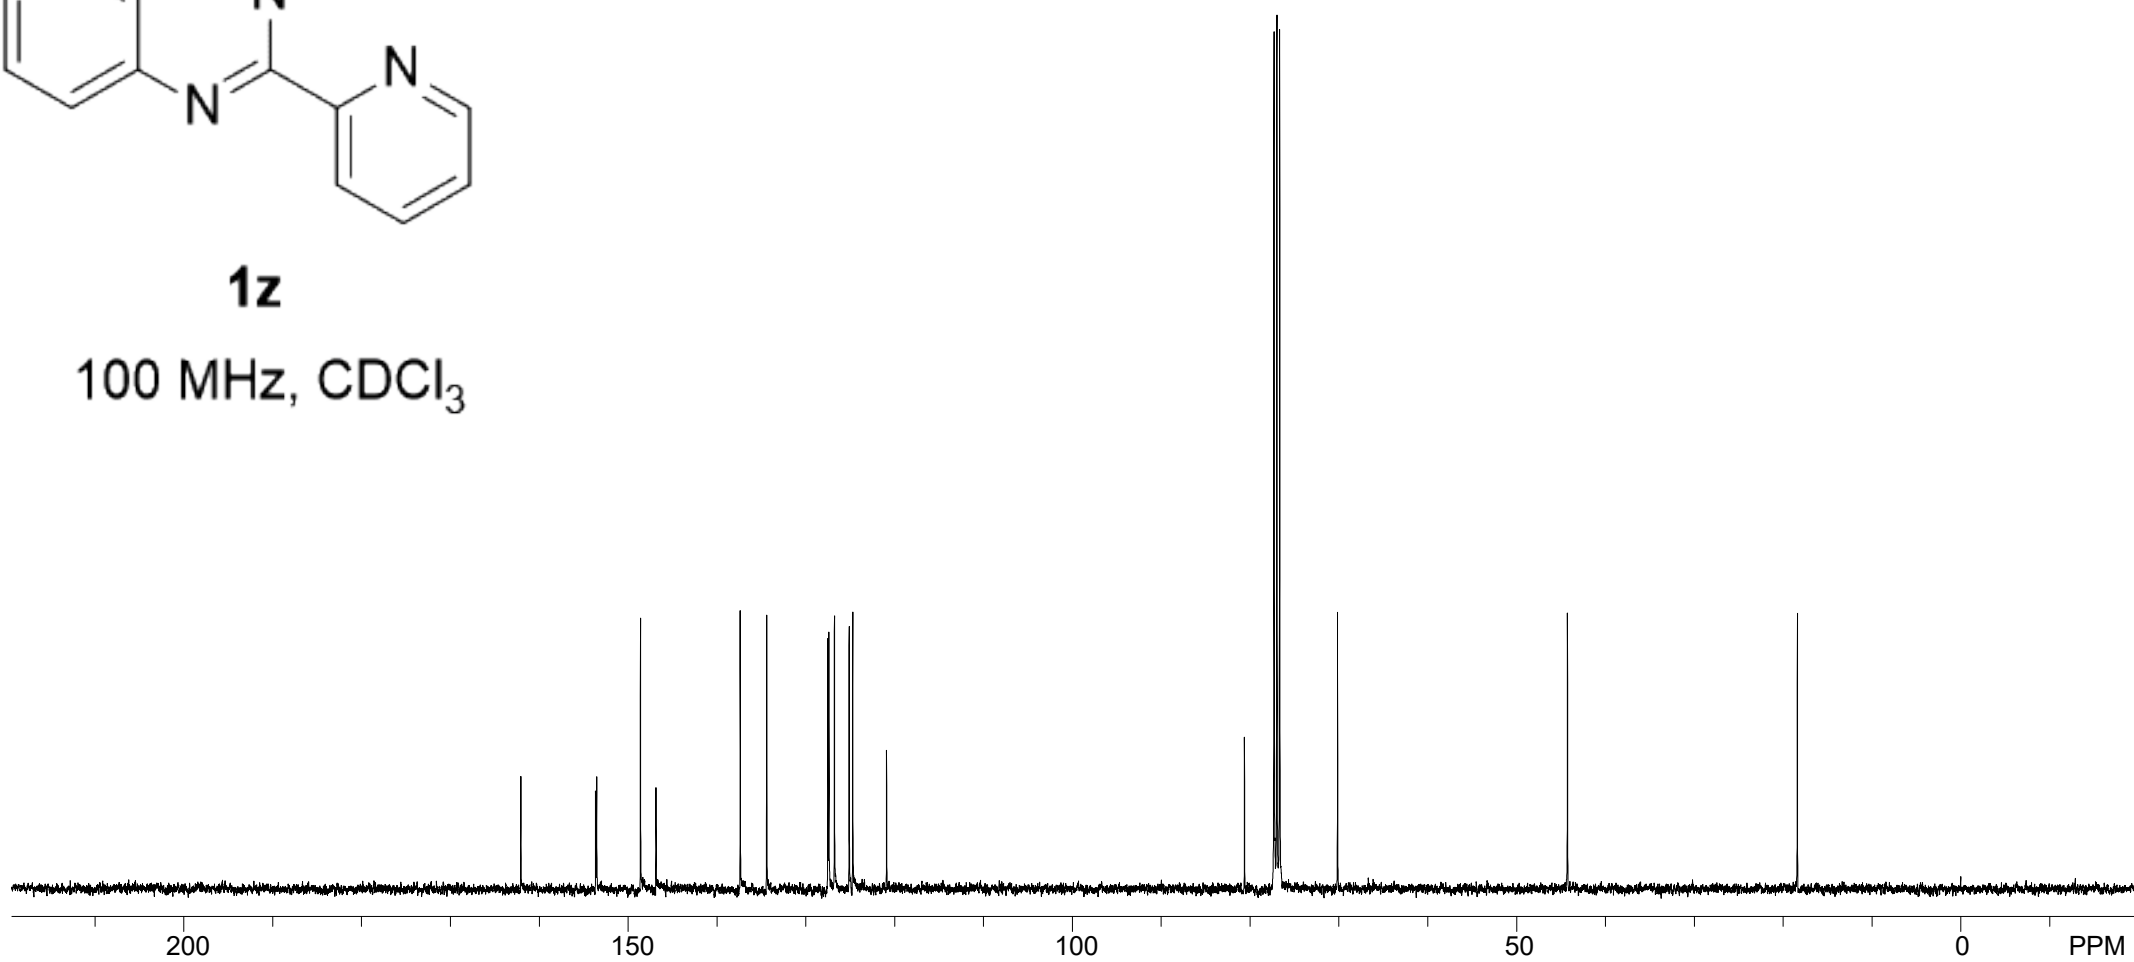

Supplement: d3ob02084c1.pdf [file d3ob02084c1.pdf]
